# Supplementary material for: Sterically controlled isodesmic late-stage C–H iodination of arenes
Source: Royal Society of Chemistry journal article supplement (doi:10.1039/d3sc00801k), 2023-01-01
Supplement: d3sc00801k1.pdf [file d3sc00801k1.pdf]

## Supporting Information

### Sterically Controlled Isodesmic Late-Stage C–H Iodination of Arenes

Mirxan Farizyan,<sup>a</sup> Rita de Jesus,<sup>a,b,‡</sup> Jyotirmoy Dey,<sup>a,b,‡</sup> Manuel van Gemmeren<sup>a,b,\*</sup>

<sup>a</sup>Organisch-Chemisches Institut, Westfälische Wilhelms-Universität Münster,  
Corrensstraße 40, 48149 Münster, Germany

<sup>b</sup>Otto-Diels-Institut für Organische Chemie, Christian-Albrechts-Universität zu Kiel, Otto-  
Hahn-Platz 4, 24118 Kiel, Germany

‡ These authors contributed equally to this work

\* mvangemmeren@oc.uni-kiel.de

## Contents

|          |                                                                                                          |          |
|----------|----------------------------------------------------------------------------------------------------------|----------|
| <b>1</b> | <b>General Experimental Methods</b> .....                                                                | <b>2</b> |
| 2        | Optimization of the Reaction Conditions .....                                                            | 5        |
| 3        | Preparation of Starting Materials. ....                                                                  | 36       |
| 4        | Scope of the Iodination .....                                                                            | 40       |
| 5        | Comparison of Isolated Selectivity and Selectivity of Crude Reaction Mixture<br>(Selected Examples)..... | 132      |
| 6        | Preliminary Mechanistic Studies .....                                                                    | 165      |
| 7        | References.....                                                                                          | 193      |

# **1 General Experimental Methods**

## **Solvents, Reagents and Techniques**

Unless otherwise noted, all reactions were carried out in oven-dried glassware. Reaction temperatures are reported as the temperature of the metal block surrounding the vessel.

The following solvents were dried by distillation over the drying agents indicated in parentheses: HFIP (activated 3Å molecular sieves), toluene (CaH<sub>2</sub>). Additional anhydrous solvents (<50 ppm water) were purchased from Acros Organics, Sigma-Aldrich, or Carl Roth and stored over molecular sieves under an argon atmosphere. For optimal yields of the reported iodination reaction the quality of the HFIP was found to be essential. There is a substantial detrimental influence of water on this reaction and thus HFIP was freshly distilled and utilized within days during the course of this project. A strong and homogeneous stirring was also found to be crucial for the optimal yield and reaction vessels were generally placed on the inner circle of the metal block. Ag<sub>2</sub>O should be powdered and should be in good quality for successfulness of the reaction.

Commercially available chemicals were obtained from ABCR, Acros Organics, Aldrich Chemical Co., Alfa Aesar, Combi-Blocks, Carbolution, Fluorochem, and TCI Europe and used as received unless otherwise stated. The Ag<sub>2</sub>O was obtained from Carbolution and stored in a glove box. Batches for short term use were extracted as required.

## **Chromatography**

Analytical thin layer chromatography (TLC) was performed on silica gel 60 F254 aluminum plates (Merck). Visualization was achieved by exposure to ultraviolet light (254 nm, 366 nm) and/or by staining. For staining the TLC plates were dipped into a solution of KMnO<sub>4</sub> (1 g KMnO<sub>4</sub>, 6 g K<sub>2</sub>CO<sub>3</sub> and 0.1 g KOH in 100 mL H<sub>2</sub>O) and developed with a heat gun if necessary. Flash column chromatography was performed on silica gel (35-70 µm mesh, 60A, Acros) with a positive argon overpressure. For purification of the iodination product, the column must be performed quickly to avoid detrimental effects of diffusion on the separation.

## **Nuclear Magnetic Resonance (NMR) Spectroscopy**

$^1\text{H}$ ,  $^{13}\text{C}$ , and  $^{19}\text{F}$  NMR spectra were recorded at room temperature on a Bruker Avance II 300 MHz, Bruker Avance II 400 MHz, Agilent DD2 500 or Agilent DD2 600 spectrometer. Chemical shifts ( $\delta$ ) of  $^1\text{H}$  and  $^{13}\text{C}$  NMR spectra are given in ppm relative to tetramethylsilane (TMS) using the residual solvent peaks for calibration ( $\text{CDCl}_3$ :  $\delta_{\text{H}} = 7.26$  ppm,  $\delta_{\text{C}} = 77.16$  ppm).<sup>1</sup>  $^{19}\text{F}$  NMR spectra are not externally calibrated and chemical shifts are given relative to the proton residual solvent peaks according to the unified chemical shift scale.<sup>2</sup> Chemical shifts are generally reported with two ( $^1\text{H}$ ) or one (all other nuclei) digits after the decimal point. NMR-data are reported as follows: chemical shift (multiplicity [s = singlet, d = doublet, t = triplet, q = quartet, quint = quintet, sept = septet, m = multiplet, br = broad], coupling constants ( $J$ , Hz) and integration). For the spectra of regioisomeric mixtures, signals clearly assigned to a particular regioisomer are labelled with a superscript at the integration. The number of protons in such cases refers to the number of protons of the respective isomer. The absence of such an index indicates that the signals of all observed regioisomers overlap, the integration given corresponds to the number of protons in each isomer. The  $^{13}\text{C}$  NMR spectra of mixtures are reported as observed. Due to the low signal intensity and potentially an overlap of signals, the number of signals can deviate from the hypothetical value, however, the signals of the major components are clearly recognizable in all cases and correspond to the literature values whenever the respective compounds are literature known. All spectra were processed using the MestReNova program.

## **Mass Spectrometry (MS)**

High resolution mass spectra (HRMS) were recorded on a Bruker Daltonics MicroTof or on a Thermo-Fisher Scientific Orbitrap LTQ XL spectrometer using electrospray ionization (ESI) and on a Exactive GC Orbitrap using electron impact ionization (EI).

## **Infrared Spectroscopy (IR)**

Infrared spectra were recorded neat on a Shimadzu FTIR 8400S or a Varian Associates FTIR 3100 Excalibur spectrometer. The wave numbers ( $\nu$ ) of recorded IR-signals are quoted in  $\text{cm}^{-1}$ .

## **Gas Chromatography with Flame Ionization Detection (GC-FID)**

GC-FID analyses were performed using an Agilent Technologies 7890B setup equipped with an HP5 column (30 m,  $0.32\text{mm} \times 0.25\text{ }\mu\text{m}$ ).



**Gas Chromatography coupled with Mass Spectrometry (GC-MS)**

GC-MS spectra were recorded on an Agilent Technologies 7890A GC-system with an Agilent 5975C VL MSD or an Agilent 5975 inert Mass Selective Detector (EI) and an HP-5MS column (30 m, 0.32mm  $\times$  0.25  $\mu$ m).

## 2 Optimization of the Reaction Conditions

### General procedure for the reactions carried out during optimization (General procedure A):

An oven dried 10 mL Schlenk tube was charged with a Pd-source, an amino acid-derived ligand, a pyridine ligand, a Ag-source, substrate (0.10 mmol), an iodine source and HFIP. The reaction mixture was then placed into the inside circle of a preheated aluminum block with a tightly fitting recess on a magnetic stirrer and stirred (1000 rpm stirring speed) at the indicated temperature until completion of the reaction.

After completion of the reaction, the reaction mixture was allowed to cool to room temperature. A stock solution of 1,3,5-trimethylbenzene in ethyl acetate was added and the reaction mixture was further diluted with ethyl acetate (2 mL). After making the solution homogeneous, an aliquot (500  $\mu$ L) of the resulting solution was filtered over a short silica column using ethyl acetate as the eluent and the resulting sample was subjected to GC-FID analysis. All yields and ratios given during the optimization studies were determined by GC-FID analysis of the crude reaction mixture using 1,3,5-trimethylbenzene as the internal standard.

**Scheme S1:** Preliminary control experiments using toluene (**1c**).

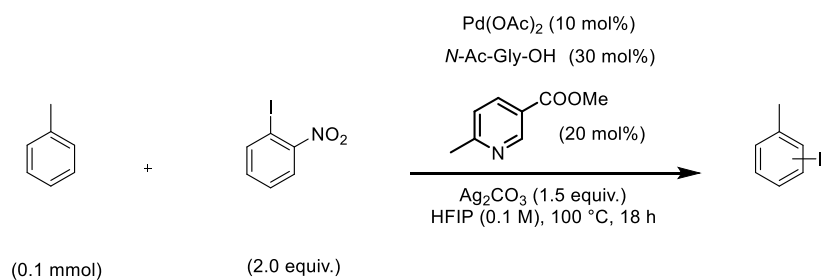

| Entry | Deviation                          | Conv.*/% | Yield*/% | o:m:p*  |
|-------|------------------------------------|----------|----------|---------|
| 1     | none                               | 77       | 32       | 0:69:31 |
| 2     | no Ag <sub>2</sub> CO <sub>3</sub> | 1        | 11       | 0:67:33 |
| 3     | no Pyr-Ligand                      | 70       | 18       | 0:61:39 |
| 4     | no N-Ac-Gly-OH                     | 2        | 5        | 0:65:35 |
| 5     | no Pd(OAc) <sub>2</sub>            |          | -        |         |
| 6     | no catalyst                        |          | -        |         |

\* GC-FID determination using TMB as internal standard

**Scheme S2:** Preliminary silver salt screening.

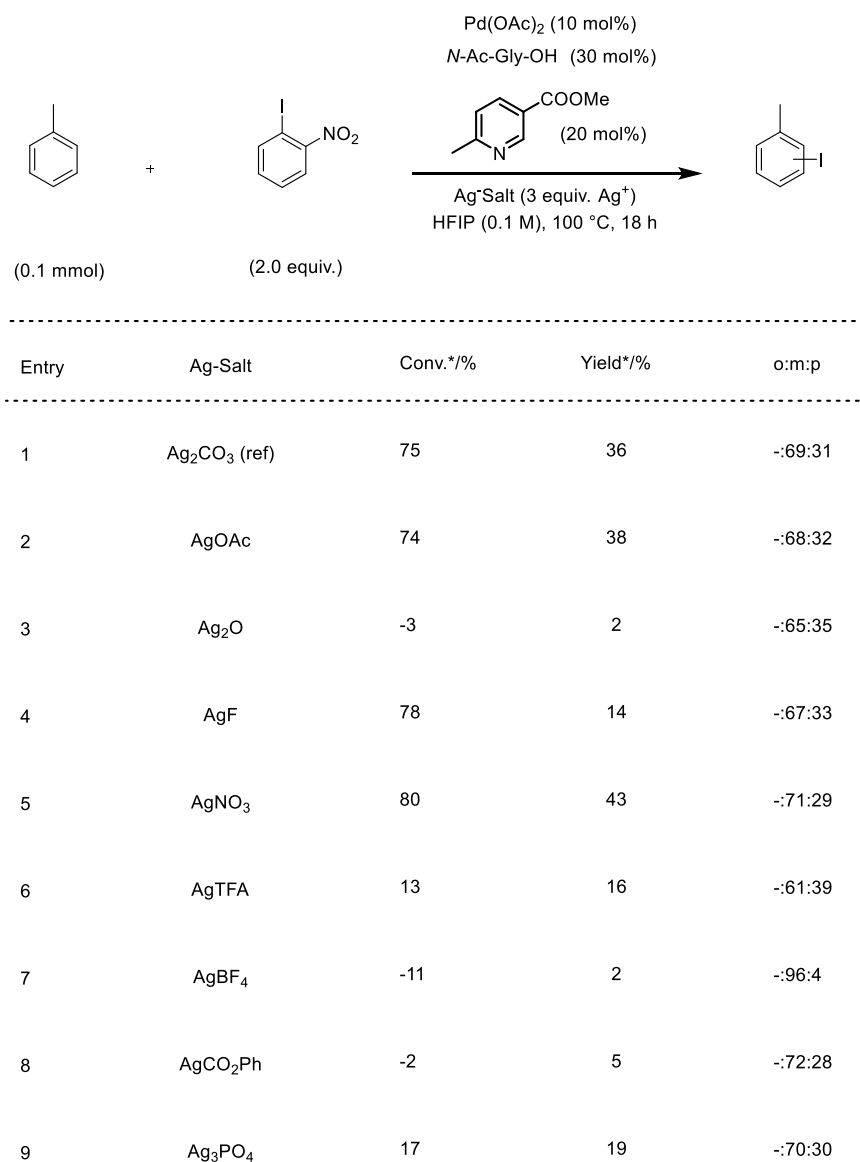

\* GC-FID determination using TMB as internal standard

Note: The silver salt presumably acts as a Lewis acid, e.g. aiding the oxidative addition and/or reductive elimination steps. A further potential role is as a halide scavenger for the iodide freed in the side reaction (biaryl formation) to prevent catalyst poisoning. These roles can be achieved with catalytic amounts of silver ions, which agrees well with the results obtained in the following tables.

**Scheme S3:** Screening of AgOAc amount.

| <div style="text-align: center;"> 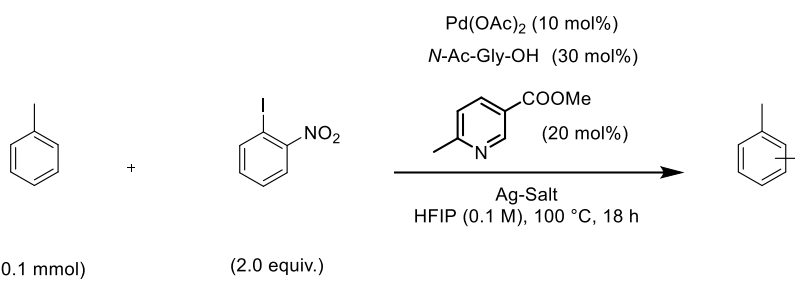 </div> |                |          |          |         |
|-----------------------------------------------------------------------------------------------------------------------------|----------------|----------|----------|---------|
| Entry                                                                                                                       | AgOAc (equiv.) | Conv.*/% | Yield*/% | o:m:p   |
| 1                                                                                                                           | 4.0            | 81       | 30       | 1:67:32 |
| 2                                                                                                                           | 3.5            | 80       | 32       | 1:67:32 |
| 3                                                                                                                           | 3.0            | 78       | 35       | 1:67:32 |
| 4                                                                                                                           | 2.5            | 77       | 37       | 1:67:32 |
| 5                                                                                                                           | 2.0            | 82       | 36       | 1:66:33 |
| 6                                                                                                                           | 1.5            | 77       | 38       | 1:67:32 |
| 7                                                                                                                           | 1.0            | 79       | 39       | 1:66:33 |
| 8                                                                                                                           | 0.5            | 71       | 42       | 1:67:32 |

\* GC-FID determination using TMB as internal standard

**Scheme S4:** Screening of AgNO<sub>3</sub> amount.

| 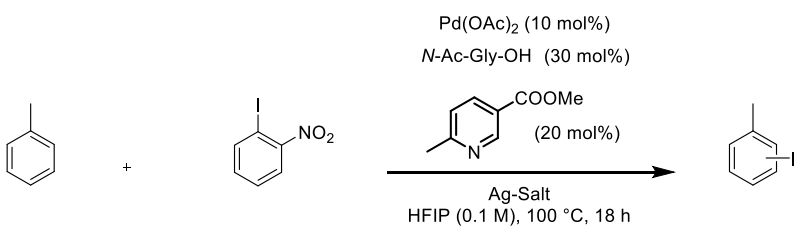 |                            |          |          |         |
|------------------------------------------------------------------------------------|----------------------------|----------|----------|---------|
| (0.1 mmol)                                                                         | (2.0 equiv.)               |          |          |         |
| Entry                                                                              | AgNO <sub>3</sub> (equiv.) | Conv.*/% | Yield*/% | o:m:p   |
| 9                                                                                  | 4.0                        | 84       | 51       | 2:67:31 |
| 10                                                                                 | 3.5                        | 80       | 52       | 2:67:31 |
| 11                                                                                 | 3.0                        | 80       | 46       | 3:68:30 |
| 12                                                                                 | 2.5                        | 85       | 55       | 2:67:31 |
| 13                                                                                 | 2.0                        | 81       | 44       | 3:67:30 |
| 14                                                                                 | 1.5                        | 78       | 47       | 4:69:29 |
| 15                                                                                 | 1.0                        | 74       | 50       | 4:67:29 |
| 16                                                                                 | 0.5                        | 72       | 53       | 3:67:30 |

\* GC-FID determination using TMB as internal standard

**Scheme S5:** Screening of silver salts using *m*-cresol methyl ether (**1a**).

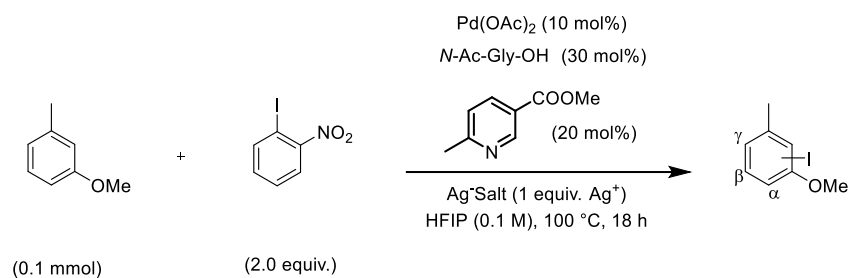

| Entry | Ag-Salt                           | Conv.*/% | Yield*/% | $\alpha$ : $\beta$ : $\gamma$ |
|-------|-----------------------------------|----------|----------|-------------------------------|
| 1     | $\text{Ag}_2\text{CO}_3$          | 47       | 26       | 13:84:3                       |
| 2     | $\text{AgOAc}$                    | 51       | 28       | 13:84:3                       |
| 3     | $\text{AgF}$                      | 52       | 17       | 23:72:5                       |
| 4     | $\text{AgNO}_3$                   | 69       | 19       | 14:82:4                       |
| 5     | $\text{AgTFA}$                    | 27       | 10       | 51:43:6                       |
| 6     | $\text{Ag}_3\text{PO}_4$          | 11       | 6        | 17:78:5                       |
| 7     | $\text{AgNO}_3$ (0.5 equiv., ref) | 65       | 16       | 13:84:3                       |

\* GC-FID determination using mesitylene as internal standard

**Scheme S6:** Screening of Ag<sub>2</sub>CO<sub>3</sub> amount.

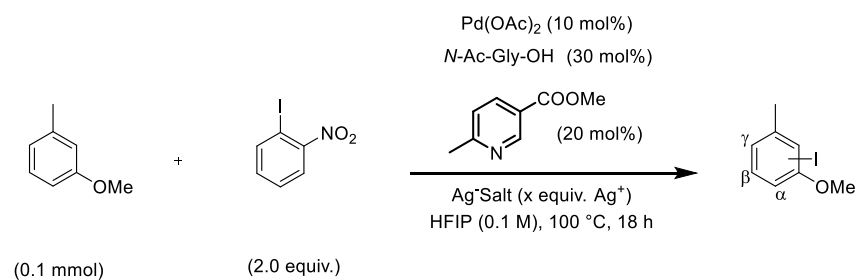

| Entry | Ag <sub>2</sub> CO <sub>3</sub> (equiv.) | Conv.*/% | Yield*/% | α:β:γ   |
|-------|------------------------------------------|----------|----------|---------|
| 1     | 1.0                                      | 50       | 24       | 13:84:3 |
| 2     | 0.25                                     | 45       | 29       | 12:85:3 |
| 3     | 0.15                                     | 39       | 26       | 12:85:3 |
| 4     | 0.05                                     | 25       | 18       | 12:86:3 |

\* GC-FID determination using mesitylene as internal standard

**Scheme S7:** Screening of AgOAc amount.

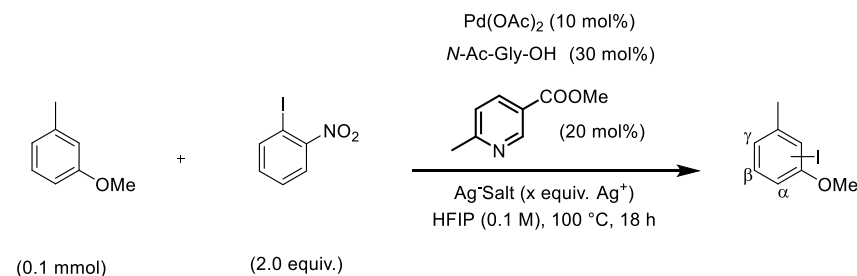

| Entry | AgOAc (equiv.) | Conv.*/% | Yield*/% | α:β:γ   |
|-------|----------------|----------|----------|---------|
| 5     | 2.0            | 52       | 29       | 13:84:3 |
| 6     | 0.5            | 50       | 30       | 13:84:3 |
| 7     | 0.3            | 43       | 28       | 13:84:3 |
| 8     | 0.1            | 30       | 21       | 12:86:3 |

\* GC-FID determination using mesitylene as internal standard



**Scheme S8:** Screening of Pd source.

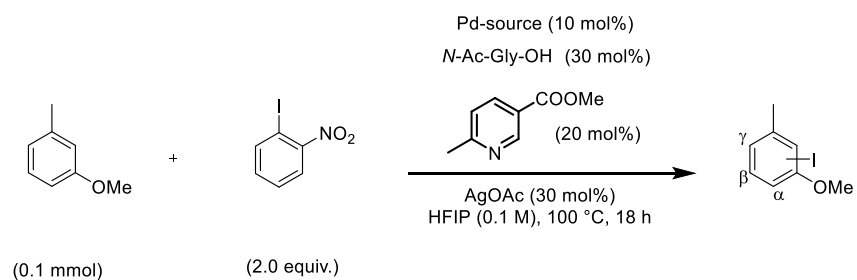

| Entry | Pd-source                                            | Conv.*/% | Yield*/% | $\alpha$ : $\beta$ : $\gamma$ |
|-------|------------------------------------------------------|----------|----------|-------------------------------|
| 1     | Pd(OAc) <sub>2</sub>                                 | 38       | 26       | 13:84:3                       |
| 2     | Pd(TFA) <sub>2</sub>                                 | 39       | 30       | 14:83:3                       |
| 3     | Pd(OPiv) <sub>2</sub>                                | 18       | 11       | 14:83:3                       |
| 4     | Pd(acac) <sub>2</sub>                                | 5        | 3        | 14:86:0                       |
| 5     | Pd(MeCN) <sub>2</sub> Cl <sub>2</sub>                | 30       | 23       | 12:85:3                       |
| 6     | PdCl <sub>2</sub>                                    | 22       | 18       | 12:85:3                       |
| 7     | Pd(PPh <sub>3</sub> ) <sub>4</sub>                   | 1        | 0        | -                             |
| 8     | Pd(PPh <sub>3</sub> ) <sub>2</sub> Cl <sub>2</sub>   | 1        | 0        | -                             |
| 9     | Pd <sub>2</sub> (allyl) <sub>2</sub> Cl <sub>2</sub> | 10       | 2        | 0:75:25                       |
| 10    | Pd(COD)Cl <sub>2</sub>                               | 7        | 0        | -                             |
| 11    | Pd(Ph-CN) <sub>2</sub> Cl <sub>2</sub>               | 18       | 14       | 11:86:3                       |

\* GC-FID determination using mesitylene as internal standard

**Scheme S9:** Screening of bidentate ligands (L1).

|            |              | <p>Pd(OAc)<sub>2</sub> (10 mol%)<br/>L1 (30 mol%)<br/>COOMe (20 mol%)<br/>AgOAc (30 mol%)<br/>HFIP (0.1 M), 100 °C, 18 h</p> |          |          |
|------------|--------------|------------------------------------------------------------------------------------------------------------------------------|----------|----------|
| (0.1 mmol) | (2.0 equiv.) |                                                                                                                              |          |          |
| Entry      | L1           | Conv.*/%                                                                                                                     | Yield*/% | α:β:γ    |
| 1          |              | 39                                                                                                                           | 26       | 13:84:3  |
| 2          |              | 27                                                                                                                           | 15       | 13:83:4  |
| 3          |              | 0                                                                                                                            | 0        | -        |
| 4          |              | 38                                                                                                                           | 25       | 13:83:4  |
| 5          |              | 19                                                                                                                           | 11       | 10:87:3  |
| 6          |              | 23                                                                                                                           | 13       | 36:52:12 |
| 7          |              | 21                                                                                                                           | 13       | 39:48:13 |
| 8          |              | 33                                                                                                                           | 20       | 15:82:4  |
| 9          |              | 17                                                                                                                           | 9        | 14:82:4  |
| 10         |              | 12                                                                                                                           | 6        | 13:87:0  |

\* GC-FID determination using mesitylene as internal standard

**Scheme S10:** Screening of bidentate ligands (L1).

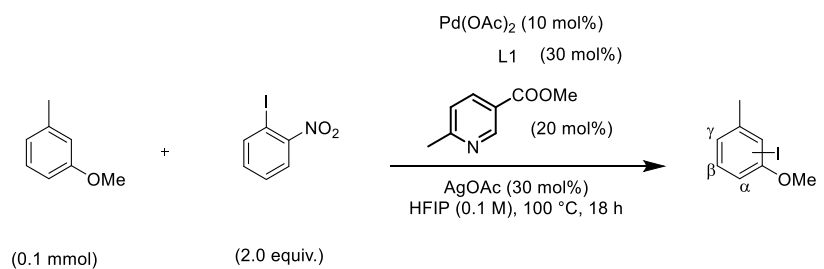

| Entry | L1 | Conv.*/% | Yield*/% | α:β:γ   |
|-------|----|----------|----------|---------|
| 1     |    | 37       | 24       | 13:84:3 |
| 2     |    | 13       | 5        | 14:86:0 |
| 3     |    | 10       | 3        | 14:86:0 |
| 4     |    | 8        | 4        | 14:86:0 |
| 5     |    | 9        | 3        | 12:88:0 |
| 6     |    | 13       | 6        | 15:85:0 |
| 7     |    | 6        | 1        | -       |
| 8     |    | 6        | traces   | -       |
| 9     |    | 6        | 1        | -       |

\* GC-FID determination using mesitylene as internal standard

**Scheme S11:** Screening of bidentate ligands (L1) with lower loading.

|            |              | <p>Pd(OAc)<sub>2</sub> (10 mol%)<br/>L1 (10 mol%)<br/>AgOAc (30 mol%)<br/>HFIP (0.1 M), 100 °C, 18 h</p> |          |          |
|------------|--------------|----------------------------------------------------------------------------------------------------------|----------|----------|
| (0.1 mmol) | (2.0 equiv.) |                                                                                                          |          |          |
| Entry      | L1           | Conv.*/%                                                                                                 | Yield*/% | α:β:γ    |
| 1          |              | 43                                                                                                       | 29       | 14:82:4  |
| 2          |              | 31                                                                                                       | 22       | 15:83:3  |
| 3          |              | 6                                                                                                        | 2        | 17:83:0  |
| 4          |              | 16                                                                                                       | 9        | 25:14:62 |
| 5          |              | 17                                                                                                       | 9        | 18:27:55 |
| 6          |              | 10                                                                                                       | 4        | 50:27:23 |
| 7          |              | 9                                                                                                        | 5        | 54:22:24 |
| 8          |              | 8                                                                                                        | 4        | 22:70:8  |
| 9          |              | 9                                                                                                        | 2        | 12:51:37 |
| 10         |              | 18                                                                                                       | 4        | 13:60:27 |

\* GC-FID determination using mesitylene as internal standard

**Scheme S12:** Rescreening of bidentate ligands (L1) with higher loading.

| 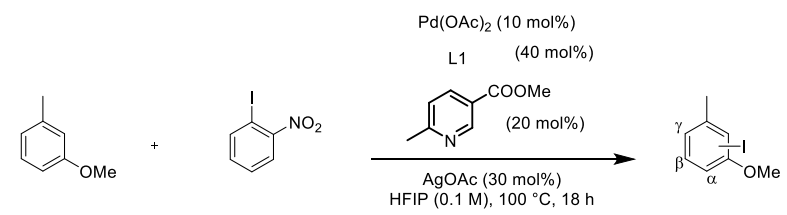 |                                                                                     |              |          |                               |
|------------------------------------------------------------------------------------|-------------------------------------------------------------------------------------|--------------|----------|-------------------------------|
| (0.1 mmol)                                                                         |                                                                                     | (2.0 equiv.) |          |                               |
| Entry                                                                              | L1                                                                                  | Conv.*/%     | Yield*/% | $\alpha$ : $\beta$ : $\gamma$ |
| 1                                                                                  |    | 40           | 26       | 13:84:3                       |
| 2                                                                                  |    | 15           | 7        | 28:72:0                       |
| 3                                                                                  |    | 0            | 0        | -                             |
| 4                                                                                  |  | 16           | 8        | 61:16:22                      |
| 5                                                                                  |  | 20           | 9        | 14:39:46                      |
| 6                                                                                  |  | 4            | 2        | 41:38:21                      |
| 7                                                                                  |  | 9            | 3        | 46:32:22                      |
| 8                                                                                  |  | 4            | 1        | 15:85:0                       |
| 9                                                                                  |  | 7            | 1        | 0:44:56                       |
| 10                                                                                 |  | 6            | 2        | 0:51:49                       |

\* GC-FID determination using mesitylene as internal standard

**Scheme S13:** Rescreening of bidentate ligands (L1) with lower loading.

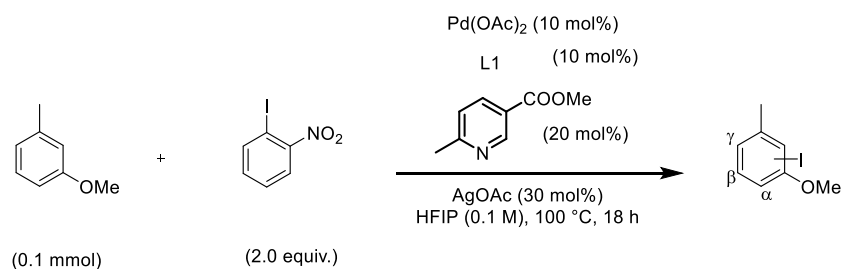

| Entry | L1 | Conv.*/% | Yield*/% | $\alpha$ : $\beta$ : $\gamma$ |
|-------|----|----------|----------|-------------------------------|
| 1     |    | 45       | 31       | 14:82:4                       |
| 2     |    | 26       | 15       | 18:77:6                       |
| 3     |    | 23       | 15       | 19:75:6                       |
| 4     |    | 16       | 8        | 15:81:4                       |
| 5     |    | 13       | 7        | 16:80:4                       |
| 6     |    | 16       | 8        | 15:81:4                       |
| 7     |    | 18       | 9        | 15:81:4                       |

\* GC-FID determination using mesitylene as internal standard

**Scheme S14:** Screening of monodentate ligands (L2).

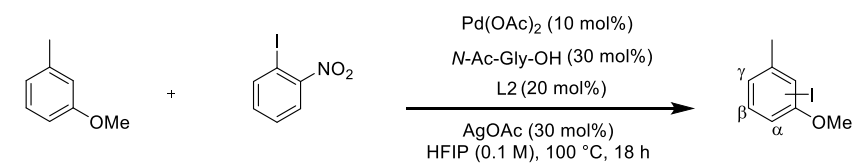

| Entry | L2 | Conv.*/% | Yield*/% | α:β:γ   |
|-------|----|----------|----------|---------|
| 1     |    | 38       | 25       | 13:84:3 |
| 2     |    | 27       | 17       | 16:80:5 |
| 3     |    | 39       | 26       | 12:85:3 |
| 4     |    | 39       | 24       | 14:83:3 |
| 5     |    | 49       | 30       | 13:84:3 |
| 6     |    | 53       | 30       | 12:85:3 |
| 7     |    | 41       | 28       | 12:84:3 |
| 8     |    | 56       | 28       | 12:85:3 |
| 9     |    | 44       | 28       | 10:87:3 |
| 10    |    | 46       | 29       | 10:87:3 |

\* GC-FID determination using mesitylene as internal standard

**Scheme S15:** Screening of monodentate ligands (L2).

| 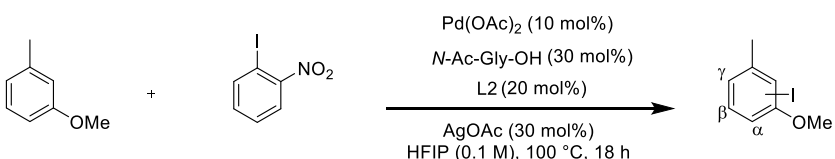 |                                                                                     |              |          |                               |
|------------------------------------------------------------------------------------|-------------------------------------------------------------------------------------|--------------|----------|-------------------------------|
| (0.1 mmol)                                                                         |                                                                                     | (2.0 equiv.) |          |                               |
| Entry                                                                              | L2                                                                                  | Conv.*/%     | Yield*/% | $\alpha$ : $\beta$ : $\gamma$ |
| 1                                                                                  |    | 43           | 28       | 13:84:3                       |
| 2                                                                                  |    | 48           | 29       | 11:86:3                       |
| 3                                                                                  |    | 60           | 34       | 13:83:4                       |
| 4                                                                                  |   | 66           | 35       | 15:80:5                       |
| 5                                                                                  |  | 59           | 34       | 14:82:4                       |
| 6                                                                                  |  | 60           | 33       | 13:83:4                       |
| 7                                                                                  |  | 58           | 33       | 15:82:3                       |

\* GC-FID determination using mesitylene as internal standard.



### Scheme S16: Screening of ligand ratios.

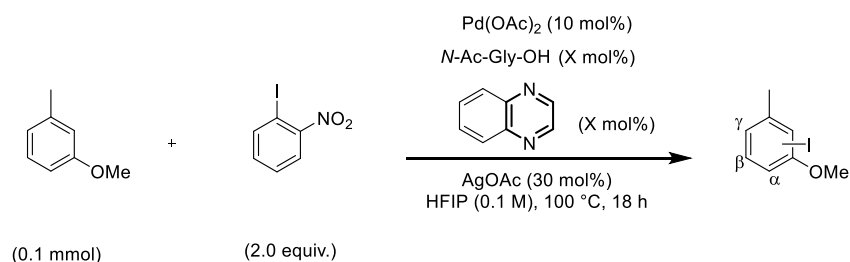

| Entry | Quinoxaline (mol%) | <i>N</i> -Ac-Gly-OH (mol%) | Conv.*/% | Yield*/% | $\alpha$ : $\beta$ : $\gamma$ |
|-------|--------------------|----------------------------|----------|----------|-------------------------------|
| 1     | 10                 | 20                         | 57       | 36       | 15:81:4                       |
| 2     | 10                 | 30                         | 54       | 33       | 13:83:4                       |
| 3     | 10                 | 40                         | 59       | 36       | 13:83:3                       |
| 4     | 10                 | 50                         | 57       | 38       | 13:84:3                       |
| 5     | 20                 | 20                         | 52       | 32       | 11:86:3                       |
| 6     | 20                 | 30                         | 48       | 31       | 11:86:3                       |
| 7     | 20                 | 40                         | 49       | 31       | 10:87:3                       |
| 8     | 20                 | 50                         | 47       | 30       | 10:87:3                       |

\* GC-FID determination using mesitylene as internal standard

### Scheme S17: Screening of *N*-Acetylglycine amount.

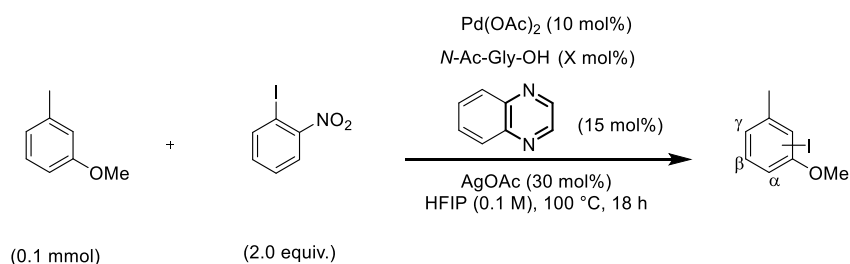

| Entry | <i>N</i> -Ac-Gly-OH (mol%) | Conv.*/% | Yield*/% | $\alpha$ : $\beta$ : $\gamma$ |
|-------|----------------------------|----------|----------|-------------------------------|
| 1     | 20                         | 55       | 35       | 12:84:3                       |
| 2     | 30                         | 54       | 33       | 12:85:3                       |
| 3     | 40                         | 53       | 34       | 11:86:3                       |
| 4     | 50                         | 53       | 33       | 11:87:3                       |

\* GC-FID determination using mesitylene as internal standard

### Scheme S18: Screening of Quinoxaline amount.

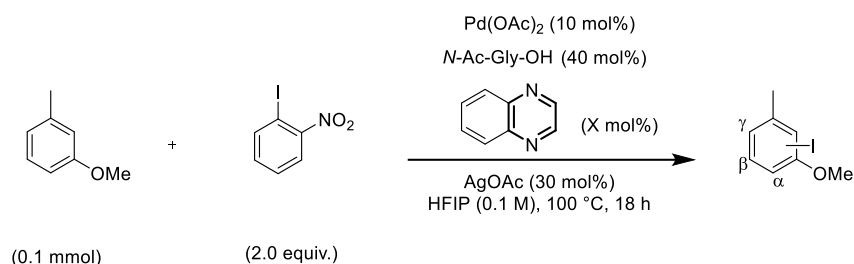

| Entry | Quinoxaline (mol%) | Conv.*/% | Yield*/% | $\alpha:\beta:\gamma$ |
|-------|--------------------|----------|----------|-----------------------|
| 1     | 10                 | 56       | 35       | 13:84:3               |
| 2     | 12                 | 56       | 34       | 12:85:3               |
| 3     | 15                 | 53       | 34       | 11:86:3               |
| 4     | 18                 | 49       | 30       | 10:87:3               |
| 5     | 20                 | 49       | 30       | 10:87:3               |

\* GC-FID determination using mesitylene as internal standard

### Scheme S19: Re-screening of Pd source.

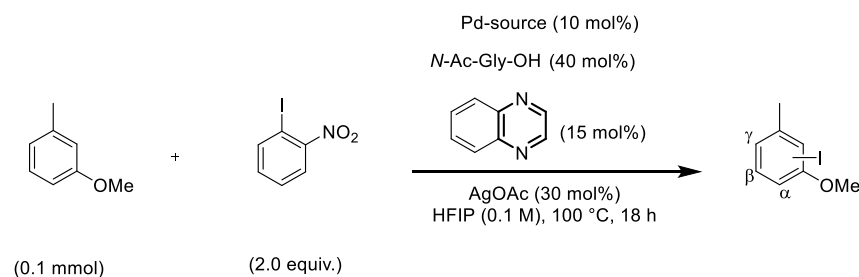

| Entry | Pd-source                             | Conv.*/% | Yield*/% | $\alpha:\beta:\gamma$ |
|-------|---------------------------------------|----------|----------|-----------------------|
| 1     | $\text{Pd}(\text{OAc})_2$             | 53       | 34       | 11:86:3               |
| 2     | $\text{Pd}(\text{TFA})_2$             | 62       | 42       | 11:86:3               |
| 3     | $\text{Pd}(\text{MeCN})_2\text{Cl}_2$ | 43       | 32       | 13:83:4               |

\* GC-FID determination using mesitylene as internal standard

**Scheme S20:** Screening of iodine sources.

| Entry | Iodine-Reagent | Conv.*/% | Yield*/% | $\alpha$ : $\beta$ : $\gamma$ |
|-------|----------------|----------|----------|-------------------------------|
| 1     | (ref)          | 58       | 41       | 11:86:3                       |
| 2     |                |          | n.d      |                               |
| 3     |                |          | traces   | -                             |
| 4     |                |          | n.d.     |                               |
| 5     |                | 48       | 21       | 66:22:12                      |
| 6     |                | 39       | 34       | 0:0:100                       |
| 7     |                | 35       | 21       | 41:50:10                      |
| 8     |                |          | n.d.     |                               |
| 9     |                | 70       | 41       | 23:71:6                       |
| 10    |                | 68       | 44       | 18:77:4                       |
| 11    |                | 20       | 7        | 9:85:6                        |
| 12    |                | 14       | 2        | -                             |

\* GC-FID determination using mesitylene as internal standard

### Scheme S21: Screening of iodine source amount.

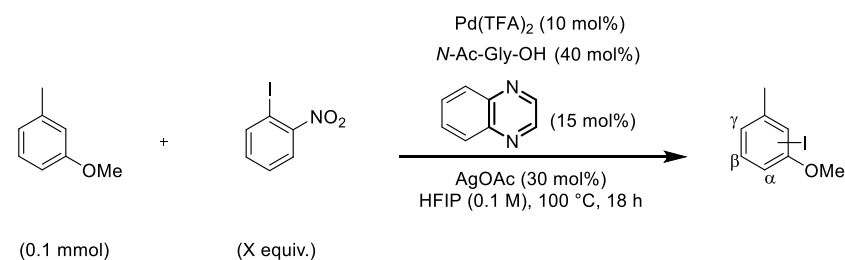

| Entry | Equiv. I-Reagent | Conv.*/% | Yield*/% | $\alpha:\beta:\gamma$ |
|-------|------------------|----------|----------|-----------------------|
| 1     | 1.1              | 49       | 31       | 10:88:3               |
| 2     | 1.3              | 53       | 36       | 10:87:3               |
| 3     | 1.5              | 55       | 37       | 10:87:3               |
| 4     | 1.7              | 58       | 40       | 11:87:3               |
| 5     | 2.0              | 60       | 43       | 11:86:3               |
| 6     | 2.3              | 63       | 44       | 11:85:3               |
| 7     | 2.5              | 68       | 47       | 14:82:4               |
| 8     | 3.0              | 69       | 50       | 14:82:4               |

\* GC-FID determination using mesitylene as internal standard

### Scheme S22: Screening of additives with AgOAc.

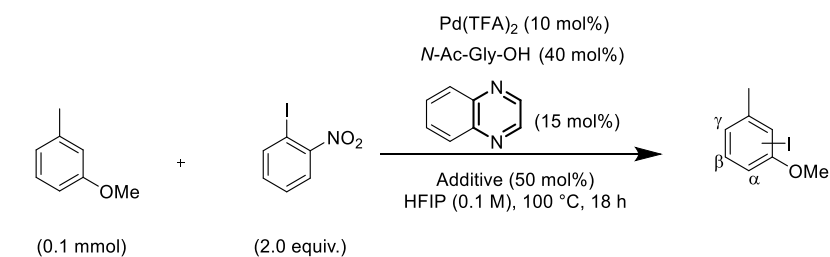

| Entry | Additive(s) with 30 mol% AgOAc                              | Conv.*/% | Yield*/% | $\alpha:\beta:\gamma$ |
|-------|-------------------------------------------------------------|----------|----------|-----------------------|
| 1     | CuOAc (0.5 equiv.)                                          | 51       | 41       | 15:80:5               |
| 2     | Cu(OAc) <sub>2</sub> (0.5 equiv.)                           | 49       | 36       | 14:82:4               |
| 3     | Cu(acac) <sub>2</sub> (0.5 equiv.)                          | 6        | 4        | 13:66:22              |
| 4     | Oxone (0.5 equiv.)                                          | 33       | 22       | 39:47:14              |
| 5     | CsCO <sub>3</sub> (0.5 equiv.)                              | 36       | 21       | 14:82:4               |
| 6     | KTFA (0.5 equiv.)                                           | 58       | 43       | 12:85:3               |
| 7     | KTFA (0.5 equiv.)<br>+<br>Cu(OAc) <sub>2</sub> (1.0 equiv.) | 44       | 33       | 18:77:5               |
| 8     | MnO <sub>2</sub> (0.6 equiv.)                               | 65       | 48       | 11:86:3               |

\* GC-FID determination using mesitylene as internal standard

**Scheme S23:** Screening of MnO<sub>2</sub> amount.

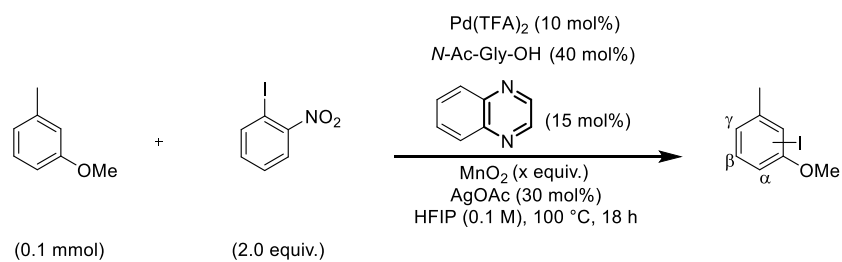

| Entry | Equiv. MnO <sub>2</sub> | Conv.*/% | Yield*/% | α:β:γ   |
|-------|-------------------------|----------|----------|---------|
| 1     | 0 (ref)                 | 60       | 43       | 11:86:3 |
| 2     | 0.25                    | 62       | 45       | 11:86:3 |
| 3     | 0.5                     | 64       | 48       | 11:86:3 |
| 4     | 0.75                    | 60       | 43       | 11:86:3 |
| 5     | 1.0                     | 55       | 39       | 10:87:3 |
| 6     | 1.5                     | 62       | 42       | 11:86:3 |
| 7     | 2.0                     | 63       | 43       | 12:85:3 |
| 8     | 3.0                     | 58       | 40       | 11:86:3 |

\* GC-FID determination using mesitylene as internal standard

**Scheme S24:** Screening of solvent mixtures with HFIP.

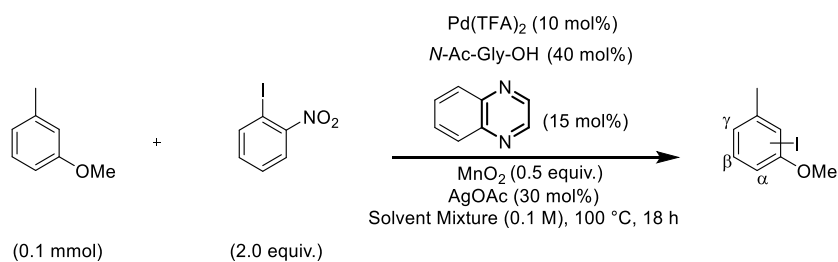

| Entry | Solvent Mixture (1:1)                   | Conv.*/% | Yield*/% | $\alpha$ : $\beta$ : $\gamma$ |
|-------|-----------------------------------------|----------|----------|-------------------------------|
| 1     | HFIP:DCE                                | 30       | 23       | 10:87:3                       |
| 2     | HFIP:MeCN                               | 18       | 2        | -                             |
| 3     | HFIP: $\text{CHCl}_3$                   | 33       | 26       | 11:86:3                       |
| 4     | HFIP:DMSO                               | 15       | 0        | -                             |
| 5     | HFIP: $\text{CF}_3\text{CH}_2\text{OH}$ | 50       | 34       | 16:80:4                       |
| 6     | HFIP:DMA                                | 12       | 1        | 0:67:33                       |
| 7     | HFIP:DME                                | 19       | 9        | 11:85:4                       |
| 8     | HFIP:EtOAc                              | 21       | 10       | 10:86:4                       |
| 9     | HFIP: <sup>t</sup> Amyl-OH              | 10       | 1        | -                             |
| 10    | HFIP:Acetone                            | 6        | 0        | -                             |
| 11    | HFIP:DMF                                | 9        | 0        | -                             |
| 12    | HFIP (ref)                              | 64       | 45       | 10:87:3                       |

\* GC-FID determination using mesitylene as internal standard

### Scheme S25: Screening of reaction concentration.

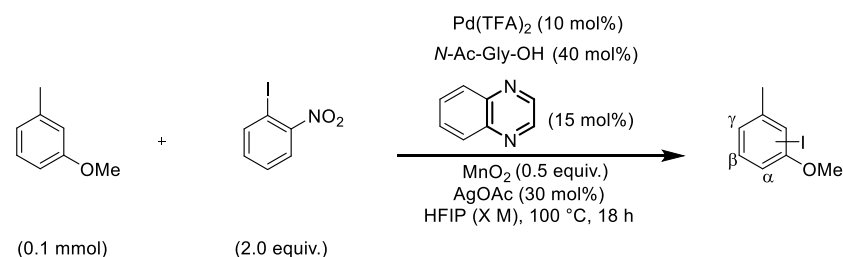

| Entry | Concentration (M)  | Conv.*/% | Yield*/% | $\alpha$ : $\beta$ : $\gamma$ |
|-------|--------------------|----------|----------|-------------------------------|
| 1     | 0.2 (0.5 mL)       | 73       | 49       | 13:82:4                       |
| 2     | 0.14 (0.7 mL)      | 64       | 45       | 11:86:3                       |
| 3     | 0.11 (0.9 mL)      | 65       | 46       | 12:84:3                       |
| 4     | 0.1 (1.0 mL) (ref) | 64       | 45       | 11:86:3                       |
| 5     | 0.09 (1.1 mL)      | 65       | 47       | 11:84:5                       |
| 6     | 0.083 (1.2 mL)     | 62       | 44       | 11:86:3                       |
| 7     | 0.077 (1.3 mL)     | 65       | 47       | 12:85:3                       |
| 8     | 0.071 (1.4 mL)     | 65       | 46       | 12:85:3                       |
| 9     | 0.067 (1.5 mL)     | 61       | 45       | 11:86:3                       |
| 10    | 0.05 (2.0 mL)      | 51       | 36       | 10:87:3                       |

\* GC-FID determination using mesitylene as internal standard

### Scheme S26: Screening of reaction time.

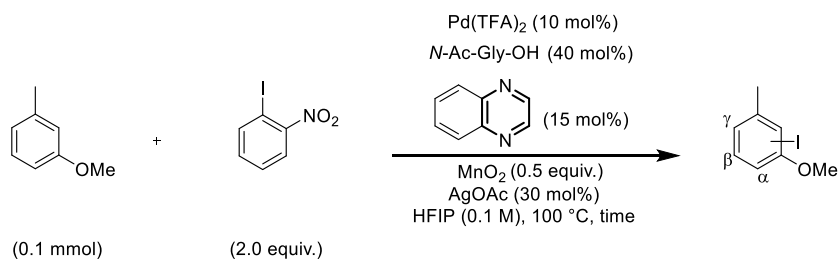

| Entry | Time/h | Conv.*/% | Yield*/% | $\alpha$ : $\beta$ : $\gamma$ |
|-------|--------|----------|----------|-------------------------------|
| 1     | 6      | 39       | 26       | 11:85:3                       |
| 2     | 10     | 44       | 31       | 11:86:3                       |
| 3     | 18     | 66       | 47       | 11:86:3                       |
| 4     | 24     | 72       | 48       | 13:84:3                       |
| 5     | 30     | 72       | 51       | 12:84:3                       |
| 6     | 48     | 77       | 51       | 13:84:4                       |
| 7     | 72     | 79       | 52       | 12:84:4                       |

\* GC-FID determination using mesitylene as internal standard

**Scheme S27:** Screening of reaction temperature.

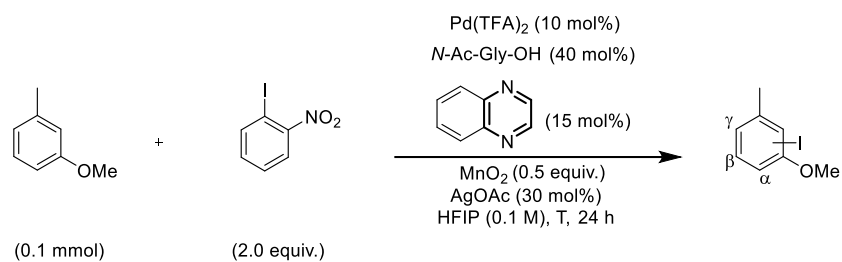

| Entry | T/ °C     | Conv.*/% | Yield*/% | $\alpha$ : $\beta$ : $\gamma$ |
|-------|-----------|----------|----------|-------------------------------|
| 1     | 60        | 19       | 13       | 12:84:3                       |
| 2     | 70        | 35       | 23       | 11:86:3                       |
| 3     | 80        | 48       | 35       | 11:87:3                       |
| 4     | 80**      | 73       | 50       | 9:88:3                        |
| 5     | 90        | 60       | 41       | 10:87:3                       |
| 6     | 100 (ref) | 68       | 48       | 10:87:3                       |
| 7     | 110       | 71       | 49       | 13:83:4                       |
| 8     | 120       | 75       | 51       | 17:78:5                       |
| 9     | 100***    | 71       | 48       | 13:83:3                       |

\* GC-FID determination using mesitylene as internal standard

\*\* Reaction performed with 72 h reaction time.

\*\*\* 0.067 M, 48 h



### Scheme S28: Re-screening of silver salts.

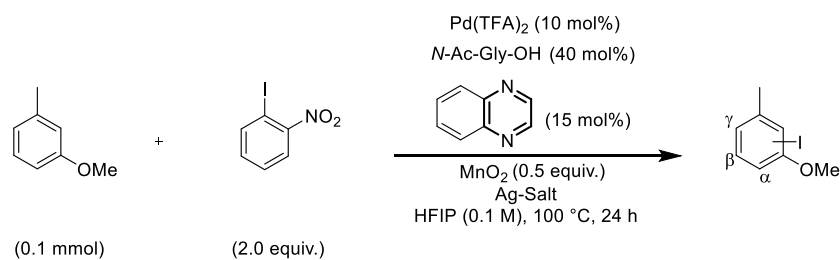

| Entry | Ag-Salt                                       | Conv.*/% | Yield*/% | $\alpha$ : $\beta$ : $\gamma$ |
|-------|-----------------------------------------------|----------|----------|-------------------------------|
| 1     | AgOAc (0.3 equiv.) (ref)                      | 72       | 50       | 13:83:4                       |
| 2     | Ag <sub>2</sub> CO <sub>3</sub> (0.15 equiv.) | 73       | 50       | 12:84:3                       |
| 3     | Ag <sub>2</sub> CO <sub>3</sub> (0.3 equiv.)  | 74       | 44       | 11:86:3                       |
| 4     | AgF (0.3 equiv.)                              | 69       | 47       | 11:86:3                       |
| 5     | AgNO <sub>3</sub> (0.3 equiv.)                | 81       | 20       | 17:78:5                       |
| 6     | Ag <sub>2</sub> O (0.15 equiv.)               | 71       | 50       | 12:85:3                       |
| 7     | Ag <sub>2</sub> O (0.3 equiv.)                | 67       | 42       | 11:87:3                       |
| 8     | Ag <sub>3</sub> PO <sub>4</sub> (0.1 equiv.)  | 32       | 25       | 32:59:9                       |
| 9     | Ag <sub>3</sub> PO <sub>4</sub> (0.3 equiv.)  | 34       | 26       | 38:51:11                      |

\* GC-FID determination using mesitylene as internal standard

### Scheme S29: Screening of Ag<sub>2</sub>O amount.

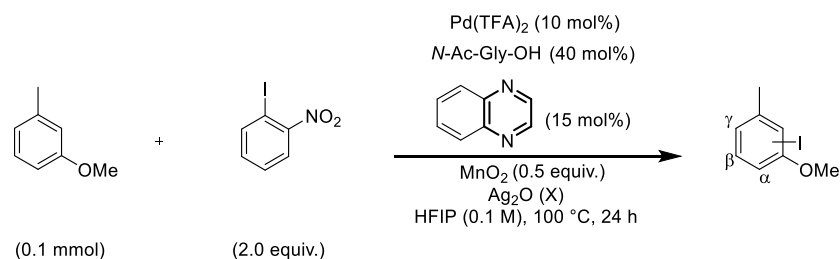

| Entry | Amount Ag <sub>2</sub> O (equiv.) | Conv.*/% | Yield*/% | $\alpha$ : $\beta$ : $\gamma$ |
|-------|-----------------------------------|----------|----------|-------------------------------|
| 1     | 0.05                              | 50       | 40       | 18:77:5                       |
| 2     | 0.1                               | 63       | 47       | 11:87:3                       |
| 3     | 0.15                              | 68       | 50       | 11:87:3                       |
| 4     | 0.2                               | 68       | 45       | 10:87:3                       |
| 5     | 0.25                              | 70       | 45       | 11:86:3                       |

\* GC-FID determination using mesitylene as internal standard

**Scheme S30:** Screening of reaction time at lower temperature.

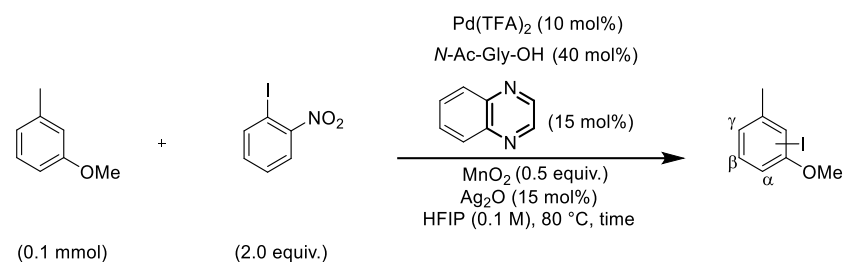

| Entry | Time/h | Conv.*/% | Yield*/% | $\alpha$ : $\beta$ : $\gamma$ |
|-------|--------|----------|----------|-------------------------------|
| 1     | 24     | 49       | 36       | 10:87:3                       |
| 2     | 48     | 68       | 47       | 10:88:2                       |
| 3     | 72     | 74       | 50       | 9:88:2                        |

\* GC-FID determination using mesitylene as internal standard

**Scheme S31:** Screening of iodine reagent amount.

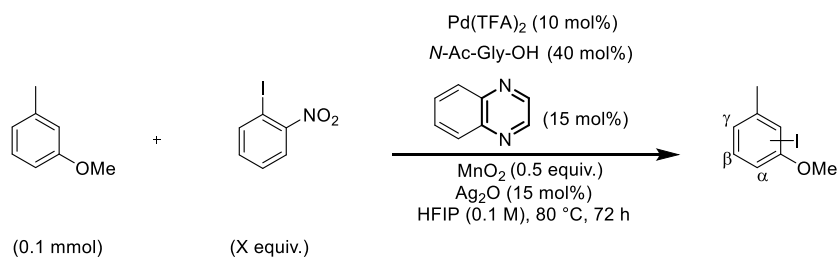

| Entry | I-Reagent/ Equiv. | Conv.*/% | Yield*/% | $\alpha$ : $\beta$ : $\gamma$ |
|-------|-------------------|----------|----------|-------------------------------|
| 1     | 2.0               | 74       | 50       | 11:86:3                       |
| 2     | 2.5               | 73       | 51       | 11:86:3                       |
| 3     | 3.0               | 78       | 54       | 11:86:3                       |
| 4     | 3.5               | 79       | 54       | 10:87:3                       |
| 5     | 4.0               | 80       | 55       | 11:85:3                       |
| 6     | 2.0**             | 78       | 49       | 11:86:3                       |

\* GC-FID determination using mesitylene as internal standard

\*\* Concentration: 0.2 M

### Scheme S32: Control experiments with MnO<sub>2</sub>.

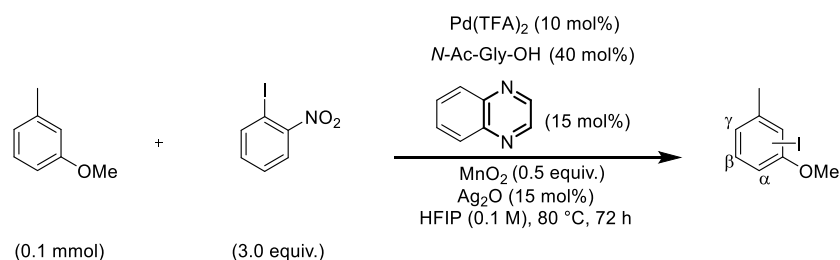

| Entry | Changes                  | Conv.*/% | Yield*/% | $\alpha$ : $\beta$ : $\gamma$ |
|-------|--------------------------|----------|----------|-------------------------------|
| 1     | none (ref)               | 76       | 54       | 10:87:3                       |
| 2     | w/o Pd(TFA) <sub>2</sub> | 4        | 0        | -                             |
| 3     | w/o N-Ac-Gly-OH          | 18       | 10       | 63:0:37                       |
| 4     | w/o Quinoxaline          | 53       | 37       | 49:7:44                       |
| 5     | w/o ligands              | 34       | 28       | 17:1:82                       |
| 6     | w/o MnO <sub>2</sub>     | 76       | 53       | 11:86:3                       |
| 7     | w/o Ag <sub>2</sub> O    | 27       | 21       | 58:29:13                      |
| 8     | 15 mol% catalyst         | 83       | 56       | 10:87:3                       |
| 9     | x1.5 amount of reagents  | 81       | 56       | 9:89:2                        |

\* GC-FID determination using mesitylene as internal standard

### Scheme S33: Control experiments without MnO<sub>2</sub>.

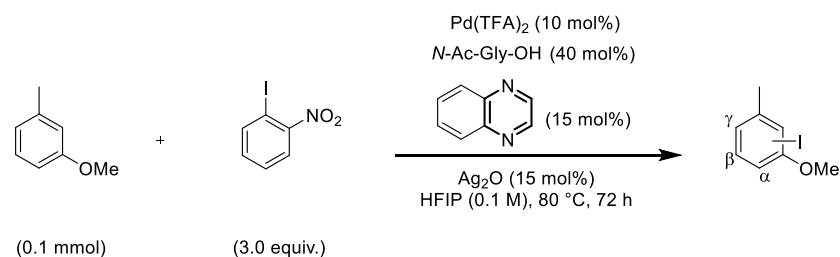

| Entry | Changes                  | Conv.*/% | Yield*/% | $\alpha$ : $\beta$ : $\gamma$ |
|-------|--------------------------|----------|----------|-------------------------------|
| 1     | none (ref)               | 80       | 54       | 11:86:3                       |
| 2     | w/o Pd(TFA) <sub>2</sub> | 0        | 0        | -                             |
| 3     | w/o N-Ac-Gly-OH          | 19       | 12       | 59:0:41                       |
| 4     | w/o Quinoxaline          | 54       | 39       | 46:6:48                       |
| 5     | w/o Ag <sub>2</sub> O    | 21       | 18       | 62:25:13                      |

\* GC-FID determination using mesitylene as internal standard

**Scheme S34:** Reaction using toluene (**1c**).

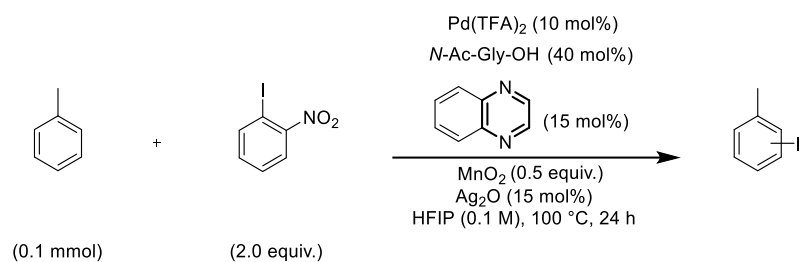

| Entry | Changes                                                       | Conv.*/% | Yield*/% | o:m:p   |
|-------|---------------------------------------------------------------|----------|----------|---------|
| 1     | none                                                          | 90       | 52       | 0:67:33 |
| 2     | no $\text{MnO}_2$                                             | 88       | 52       | 0:67:33 |
| 3     | $\text{AgNO}_3$ (0.5 equiv.) instead of $\text{Ag}_2\text{O}$ | 92       | 42       | 0:67:33 |

**Scheme S35:** Screening of silver salts.

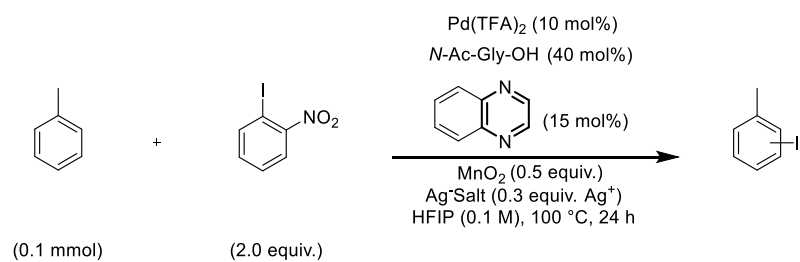

| Entry | Ag-Salt                  | Conv.*/% | Yield*/% | o:m:p   |
|-------|--------------------------|----------|----------|---------|
| 1     | $\text{Ag}_2\text{O}$    | 92       | 47       | 0:67:33 |
| 2     | $\text{AgOAc}$           | 91       | 49       | 0:66:34 |
| 3     | $\text{Ag}_2\text{CO}_3$ | 91       | 51       | 0:67:33 |
| 4     | $\text{AgNO}_3$          | 87       | 45       | 0:67:33 |

**Scheme S36:** Screening of reaction time using Ag<sub>2</sub>O and Ag<sub>2</sub>CO<sub>3</sub>.

(0.1 mmol)                      (2.0 equiv.)

| Entry | Conditions                             | Conv.*/% | Yield*/% | o:m:p   |
|-------|----------------------------------------|----------|----------|---------|
| 1     | Ag <sub>2</sub> O; 24 h                | 73       | 51       | 0:69:31 |
| 2     | Ag <sub>2</sub> O; 48 h                | 83       | 55       | 0:69:31 |
| 3     | Ag <sub>2</sub> O; 72 h                | 91       | 50       | 0:68:32 |
| 4     | Ag <sub>2</sub> CO <sub>3</sub> ; 24 h | 75       | 52       | 0:69:31 |
| 5     | Ag <sub>2</sub> CO <sub>3</sub> ; 48 h | 83       | 52       | 0:68:32 |
| 6     | Ag <sub>2</sub> CO <sub>3</sub> ; 72 h | 93       | 46       | 0:67:33 |

**Scheme S37:** Screening of iodine reagent amount.

(0.1 mmol)                      (X equiv.)

| Entry | Changes | Conv.*/% | Yield*/% | o:m:p   |
|-------|---------|----------|----------|---------|
| 1     | 1.2     | 83       | 48       | 0:69:31 |
| 2     | 1.5     | 87       | 50       | 0:69:31 |
| 3     | 2.0**   | 87       | 54       | 0:68:32 |

\* GC-FID determination using mesitylene as internal standard  
 \*\* 70 °C

**Scheme S38:** Screening of temperature, reaction time and iodine reagent amount.

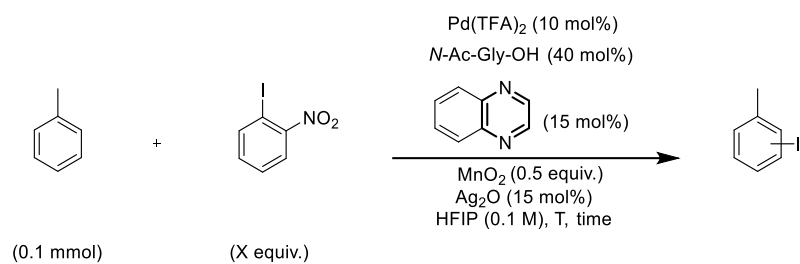

| Entry | Conditions              | Conv.*/% | Yield*/% | o:m:p   |
|-------|-------------------------|----------|----------|---------|
| 1     | 80 °C, 72 h, 3.0 equiv. | 95       | 40       | 0:66:34 |
| 2     | 80 °C, 48 h, 3.0 equiv. | 93       | 52       | 0:66:34 |
| 3     | 80 °C, 48 h, 2.0 equiv. | 90       | 52       | 0:68:32 |
| 4     | 70 °C, 48 h, 2.0 equiv. | 83       | 56       | 0:68:32 |
| 5     | 70 °C, 48 h, 3.0 equiv. | 83       | 55       | 0:68:32 |
| 6     | 70 °C, 72 h, 3.0 equiv. | 90       | 53       | 0:67:33 |
| 7     | 70 °C, 72 h, 2.0 equiv. | 86       | 55       | 0:69:31 |

\* GC-FID determination using mesitylene as internal standard.

**Scheme S39:** Reaction using ethyl benzoate (**1h**).

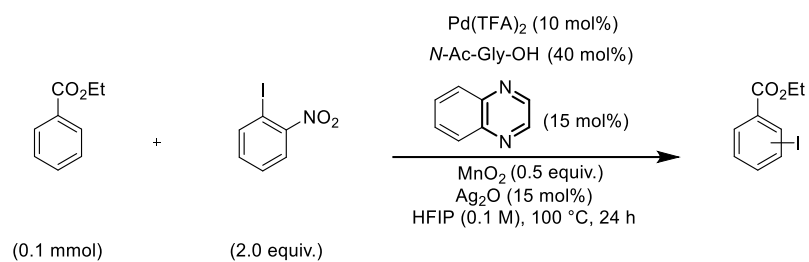

| Entry | Changes                                                     | Conv.*/% | Yield*/% | m:p   |
|-------|-------------------------------------------------------------|----------|----------|-------|
| 1     | none                                                        | 59       | 27       | 73:27 |
| 2     | no MnO <sub>2</sub>                                         | 59       | 27       | 73:27 |
| 3     | AgNO <sub>3</sub> (0.5 equiv.) instead of Ag <sub>2</sub> O | 39       | 23       | 73:27 |

**Scheme S40:** Screening of silver salts.

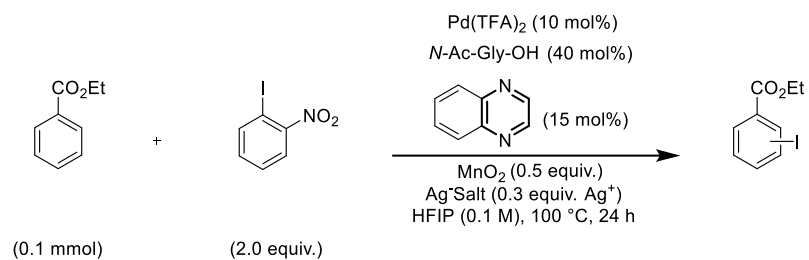

| Entry | Ag-Salt                         | Conv.*/% | Yield*/% | m:p   |
|-------|---------------------------------|----------|----------|-------|
| 1     | Ag <sub>2</sub> O               | 59       | 29       | 72:28 |
| 2     | AgOAc                           | 56       | 28       | 73:27 |
| 3     | Ag <sub>2</sub> CO <sub>3</sub> | 60       | 28       | 72:28 |
| 4     | AgNO <sub>3</sub>               | 50       | 27       | 75:25 |

**Scheme S41:** Screening of temperature and reaction time.

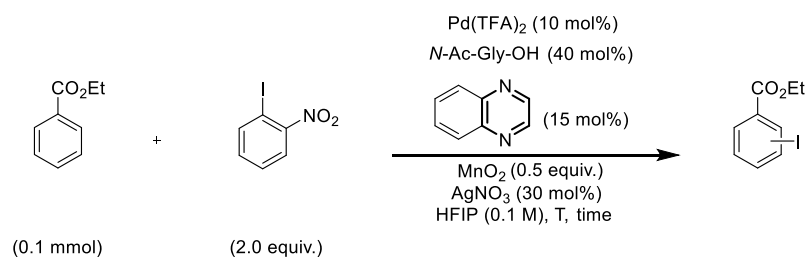

| Entry | Conditions   | Conv.*/% | Yield*/% | m:p   |
|-------|--------------|----------|----------|-------|
| 1     | 90 °C; 48 h  | 47       | 27       | 74:26 |
| 2     | 90 °C; 72 h  | 57       | 31       | 76:24 |
| 3     | 100 °C; 48 h | 58       | 31       | 74:26 |
| 4     | 100 °C; 72 h | 63       | 31       | 73:27 |

\* GC-FID determination using mesitylene as internal standard

**Scheme S42:** Screening of temperature and iodine reagent amount.

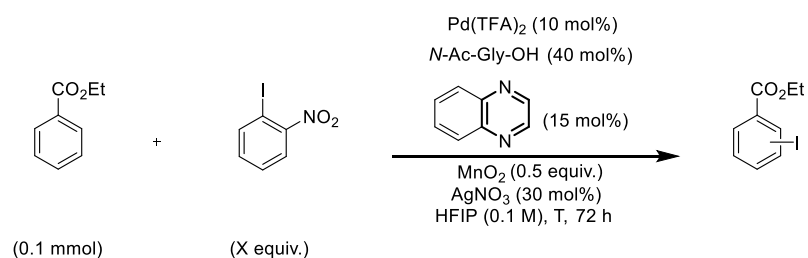

| Entry | Conditions         | Conv.*/% | Yield*/% | m:p   |
|-------|--------------------|----------|----------|-------|
| 1     | 100 °C; 4.0 equiv. | 66       | 37       | 73:27 |
| 2     | 100 °C; 5.0 equiv. | 70       | 36       | 73:27 |
| 3     | 110 °C; 4.0 equiv. | 67       | 34       | 71:29 |
| 4     | 110 °C; 5.0 equiv. | 69       | 35       | 71:29 |
| 5     | 120 °C; 4.0 equiv. | 66       | 34       | 72:28 |
| 6     | 120 °C; 5.0 equiv. | 62       | 33       | 70:30 |

\* GC-FID determination using mesitylene as internal standard



### 3 Preparation of Starting Materials.

#### a) *N*-(3-methylphenethyl)dodecanamide (**1u**):

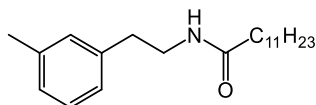

At 0 °C dodecanoyl chloride (481 mg, 2.20 mmol, 1.1 equiv.) was added dropwise to a mixture of 2-(m-tolyl)ethan-1-amine (270 mg, 2.00 mmol, 1.0 equiv.) and NEt<sub>3</sub> (334 μL, 2.40 mmol, 1.2 equiv.) in CH<sub>2</sub>Cl<sub>2</sub> (0.5 M). The reaction mixture was then stirred at 50 °C overnight. After allowing to cool to room temperature, water (20 mL) was added, and the resulting mixture was extracted with CH<sub>2</sub>Cl<sub>2</sub> (3 × 20 mL). The combined organic layers were dried over MgSO<sub>4</sub>, filtered and concentrated under reduced pressure. Purification via silica gel column chromatography using EtOAc : pentane = 3:7 as the eluent delivered the target compound **1u** as colorless solid (600 mg, 1.89 mmol, 94%).

**<sup>1</sup>H NMR (CDCl<sub>3</sub>, 400 MHz):** δ = 7.20 (t, J = 7.5 Hz, 1H), 7.04 (d, J = 7.6 Hz, 1H), 7.02-6.96 (m, 2H), 5.44 (s, NH), 3.57-3.43 (m, 2H), 2.77 (t, J = 6.9 Hz, 2H), 2.33 (s, 3H), 2.13-2.08 (m, 2H), 1.66-1.50 (m, 2H), 1.34-1.18 (m, 16H), 0.91-0.84 (m, 3H) ppm.

**<sup>13</sup>C NMR (CDCl<sub>3</sub>, 100 MHz):** δ = 173.3, 139.0, 138.4, 129.7, 128.6, 127.4, 125.9, 40.6, 37.0, 35.8, 32.1, 29.8, 29.7, 29.6, 29.5(1), 29.4(7), 29.4, 25.9, 22.8, 21.5, 14.3 ppm.

**HRMS (ESI pos) m/z:** Calcd for C<sub>21</sub>H<sub>35</sub>NONa<sup>+</sup> 340.2611, Found 340.2604.

**IR (cm<sup>-1</sup>):** 3308, 2919, 2851, 1637, 1545, 1507, 699.

**$^1\text{H}$  NMR spectrum in  $\text{CDCl}_3$ :**

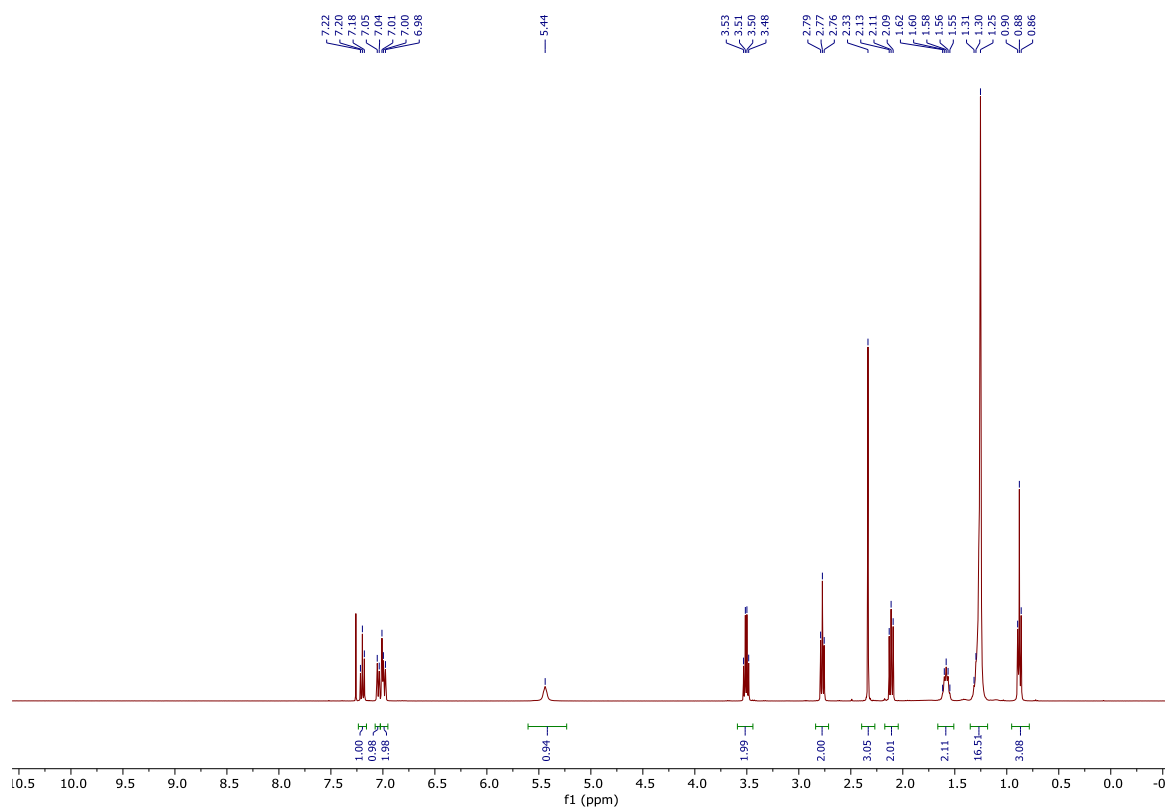

**$^{13}\text{C}$  NMR spectrum in  $\text{CDCl}_3$ :**

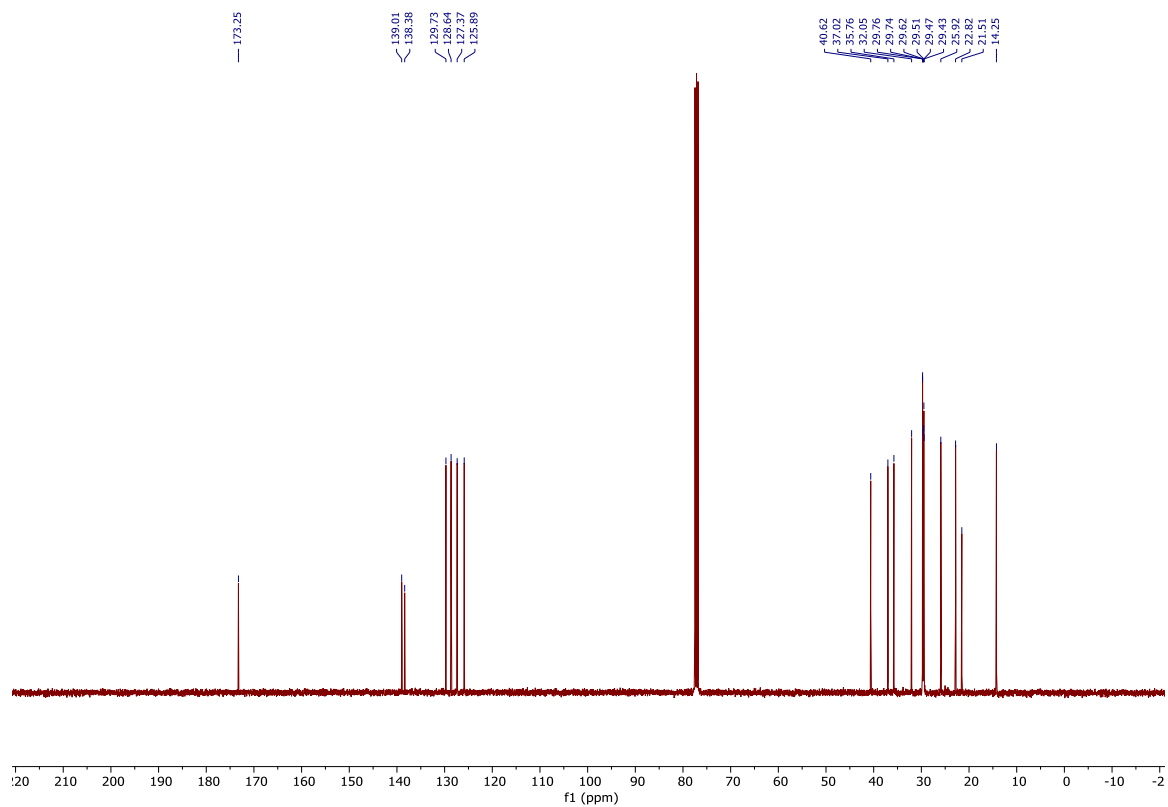

**b) 1-isopropyl-4-methyl-2-((3-methylbenzyl)oxy)benzene (1am):**

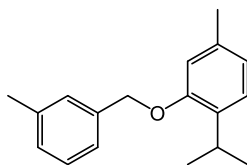

An oven dried 50 mL Schlenk tube was charged with NaH (60% in mineral oil, 104 mg, 2.60 mmol, 1.3 equiv.) and a THF:CH<sub>2</sub>Cl<sub>2</sub> mixture (5:1, 10 mL). Thymol (300 mg, 2.00 mmol, 1.0 equiv.) was added slowly and the reaction mixture was stirred for 15 minutes. After cooling to 0 °C 1-(iodomethyl)-3-methylbenzene (557 mg, 2.40 mmol, 1.2 equiv.) was added dropwise. The reaction mixture was then stirred at 50 °C and 16 h. After allowing to cool to room temperature, water (20 mL) was added, and the resulting mixture was extracted with CH<sub>2</sub>Cl<sub>2</sub> (3 × 20 mL). The combined organic layers were dried over MgSO<sub>4</sub>, filtered and concentrated under reduced pressure. Purification via silica gel column chromatography using EtOAc : pentane = 3:7 as the eluent delivered the target compound **1u** as colorless oil (470 mg, 1.85 mmol, 93%).

**<sup>1</sup>H NMR (CDCl<sub>3</sub>, 400 MHz):** δ = 7.33-7.25 (m, 3H), 7.17-7.12 (m, 2H), 6.81-6.75 (m, 2H), 5.04 (s, 2H), 3.39 (hept, J = 6.9 Hz, 1H), 2.40 (s, 3H), 2.34 (s, 3H), 1.24 (d, J = 6.9 Hz, 6H) ppm.

**<sup>13</sup>C NMR (CDCl<sub>3</sub>, 100 MHz):** δ = 156.1, 138.3, 137.7, 136.5, 134.5, 128.5(7), 128,5(5), 128.0, 126.1, 124.4, 121.6, 112.9, 70.2, 26.7, 23.0, 21.6, 21.5 ppm.

**HRMS (EI pos) m/z:** Calcd for C<sub>18</sub>H<sub>22</sub>O<sup>+</sup> 254.1665, Found 254.1665.

**IR (cm<sup>-1</sup>):** 2959, 1610, 1490, 1506, 1457, 1288, 1255, 1166, 1026, 809, 763, 692.

**$^1\text{H}$  NMR spectrum in  $\text{CDCl}_3$ :**

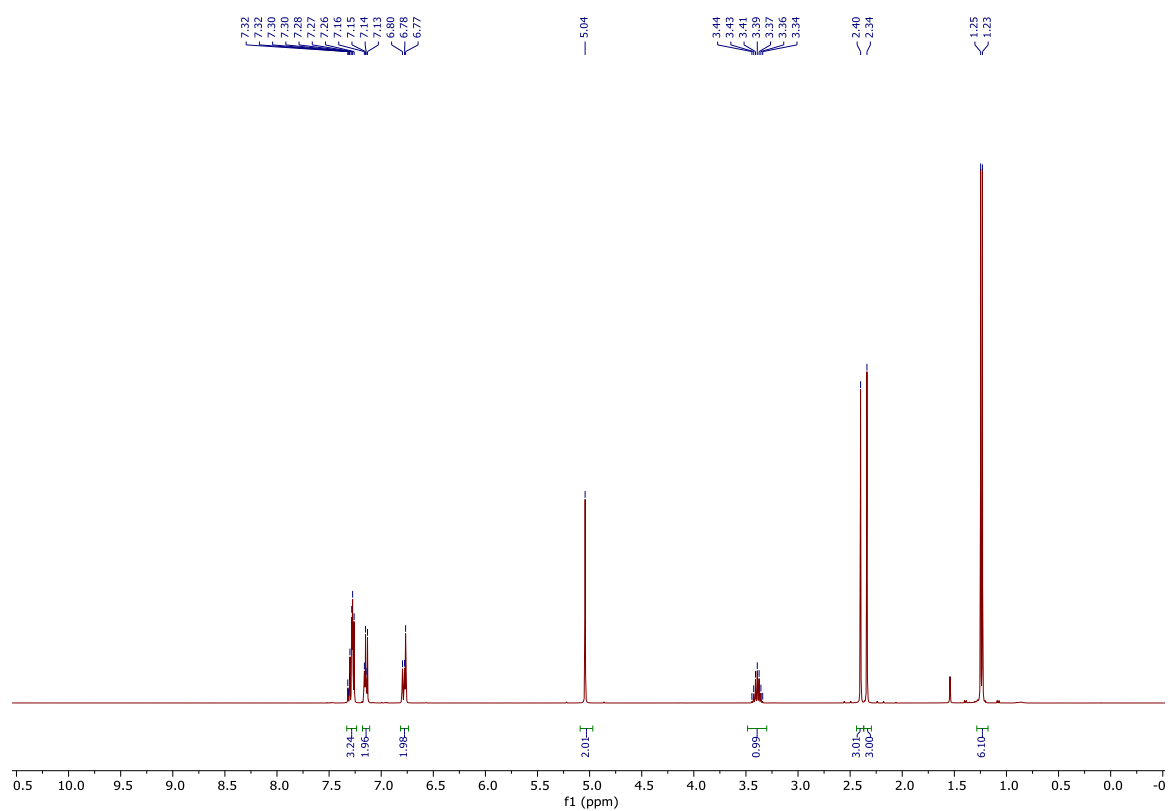

**$^{13}\text{C}$  NMR spectrum in  $\text{CDCl}_3$ :**

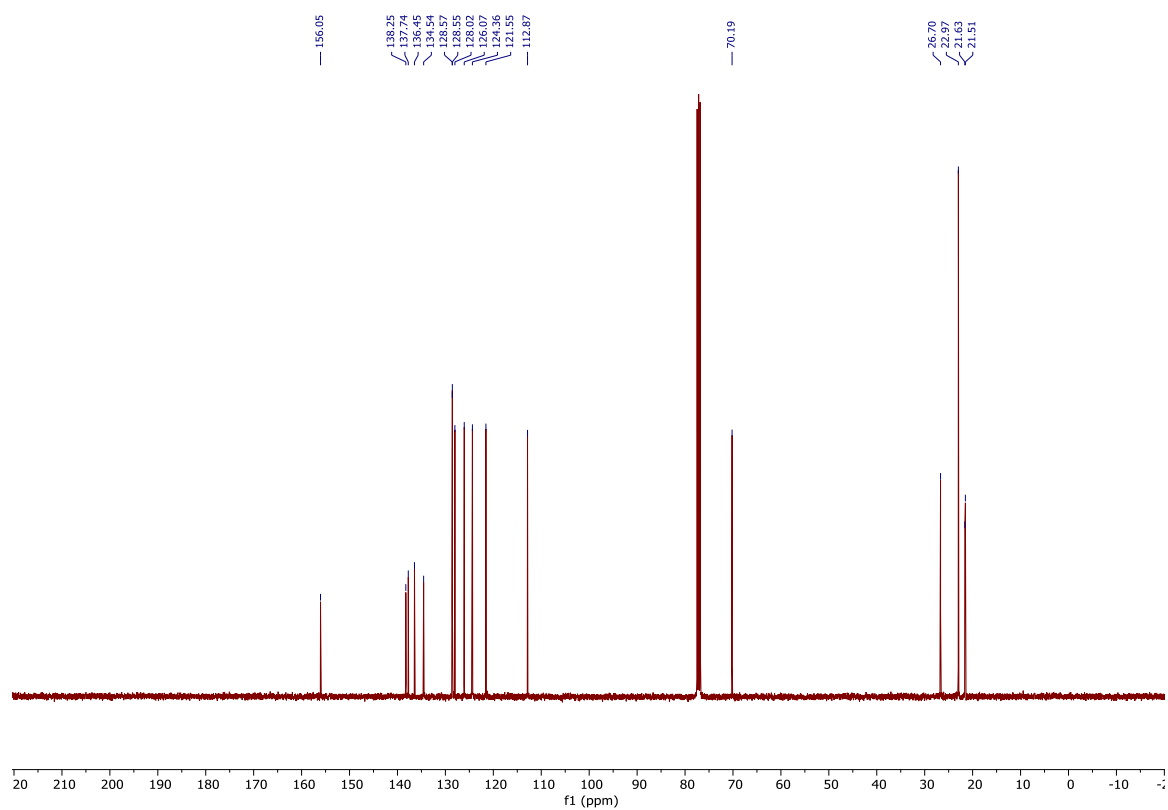

## 4 Scope of the Iodination

### **General procedure B: Iodination of arenes**

An oven dried 10 mL Schlenk tube was charged with Pd(TFA)<sub>2</sub> (6.64 mg, 0.020 mmol, 10 mol%), quinoxaline (3.90 mg, 0.030 mmol, 15 mol%), *N*-acetyl-glycine (9.36 mg, 0.080 mmol, 40 mol%), Ag<sub>2</sub>O (6.96 mg, 0.030 mmol, 15 mol%), the arene substrate (0.200 mmol, 1 equiv.), and 1-iodo-2-nitrobenzene (150 mg, 0.600 mmol, 3.0 equiv.), followed by HFIP (2.0 mL). The reaction vessel was tightly sealed and placed into the inside circle of an aluminum block (preheated to 80 °C) with a tightly fitting recess on a magnetic stirrer. The reaction mixture was stirred with 1000 rpm speed at this temperature for 72 h. After completion of the reaction, the mixture was allowed to cool to room temperature, transferred into a 100 mL round-bottom flask, and concentrated under reduced pressure. The product was then purified according to the procedure described for the respective substrate.

**1-iodo-3-methoxy-5-methylbenzene (3a)**

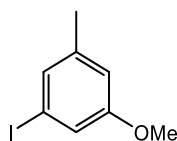

Following the general procedure B, using 1-iodo-2-nitrobenzene (**2**) (150 mg, 0.600 mmol, 3.0 equiv.), 1-methoxy-3-methylbenzene (**1a**) (24.4 mg, 0.200 mmol), and purification via silica column chromatography using pentane:CH<sub>2</sub>Cl<sub>2</sub> = 20:1 as the eluent, the target compound **3a** was obtained as a colorless liquid (24.7 mg, 50%). The assignment of the compound was achieved by comparison with the literature.<sup>3</sup>

**<sup>1</sup>H NMR (CDCl<sub>3</sub>, 400 MHz):**  $\delta$  = 7.14 (s, 1H), 7.05 (s, 2H), 6.67 (s, 1H), 3.76 (s, 3H), 2.28 (s, 3H) ppm.

**<sup>13</sup>C NMR (CDCl<sub>3</sub>, 100 MHz):**  $\delta$  = 160.2, 141.4, 130.8, 120.1, 114.9, 94.3, 55.5, 21.2 ppm.

Due to coelution of  $\alpha$ - and  $\gamma$ -isomers with remaining substrate **1a** and diiodinated arene **1a** only  $\beta$ -iodinated product was been isolated.

**$^1\text{H}$  NMR spectrum in  $\text{CDCl}_3$ :**

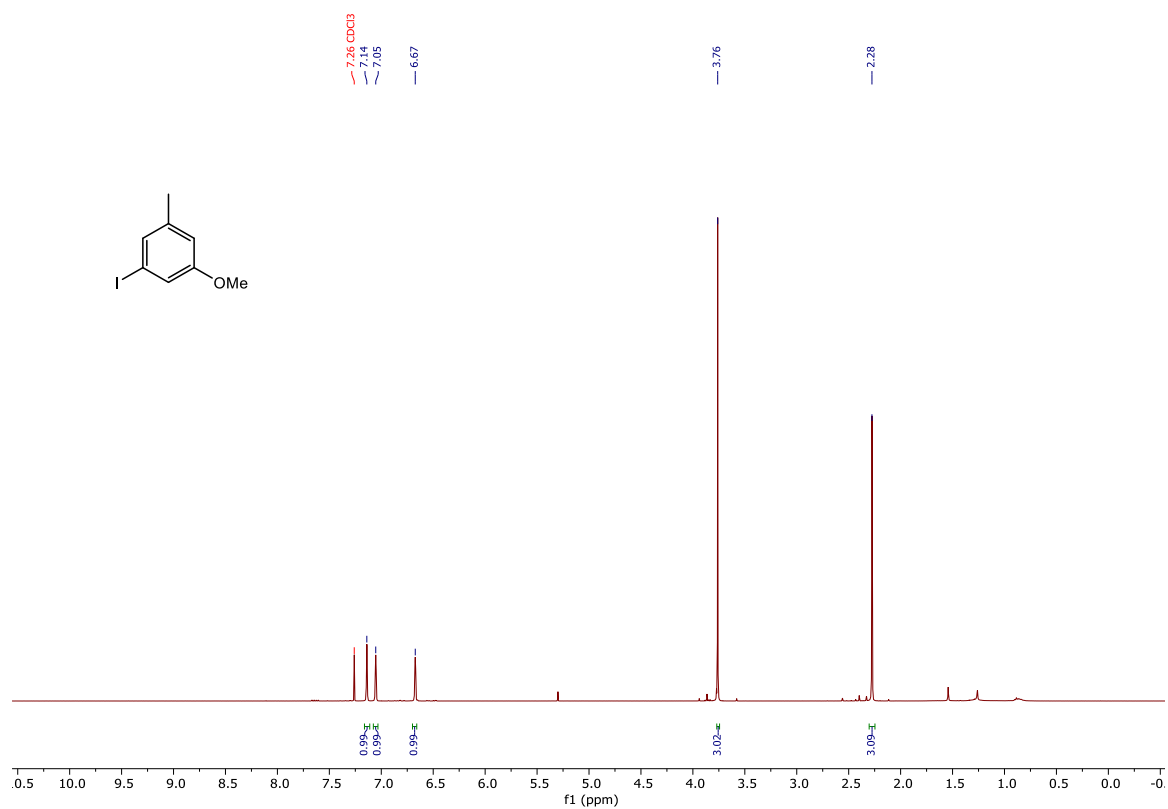

**$^{13}\text{C}$  NMR spectrum in  $\text{CDCl}_3$ :**

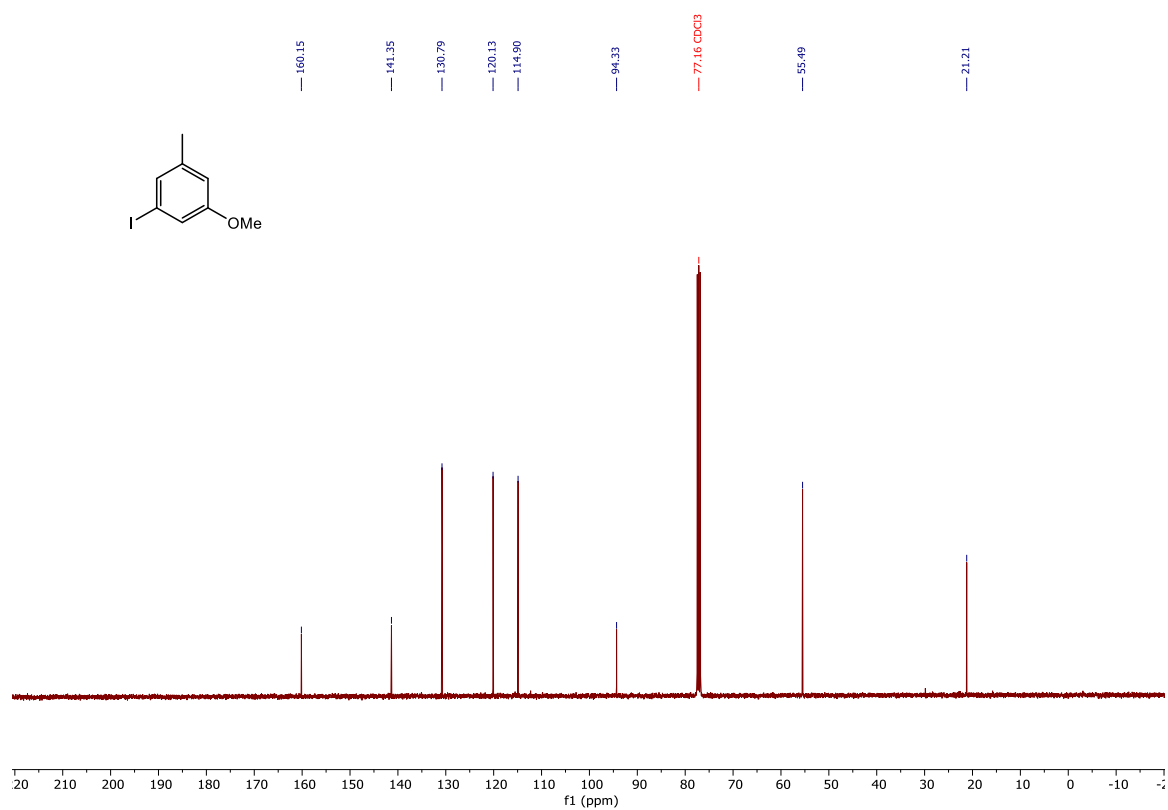

**1-iodo-2-methoxy-4-methylbenzene (3a'- $\alpha$ ), 1-iodo-3-methoxy-5-methylbenzene (3a'- $\beta$ )  
and 1-iodo-4-methoxy-2-methylbenzene (3a'- $\gamma$ )**

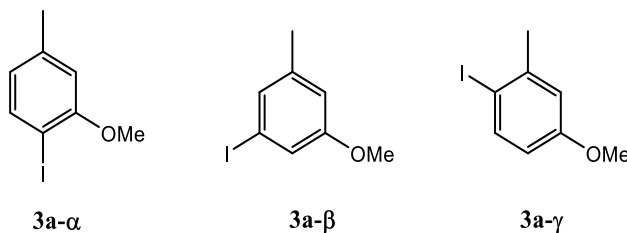

Following the general procedure B, using 1-iodo-2-nitrobenzene (**2**) (150 mg, 0.600 mmol, 3.0 equiv.), 1-methoxy-3-methylbenzene (**1a**) (24.4 mg, 0.200 mmol), and purification via silica column chromatography using pentane:CH<sub>2</sub>Cl<sub>2</sub> = 20:1 as the eluent, the target compound **3a** was obtained as a colorless liquid (27.4 mg, 55%,  $\alpha$ : $\beta$ : $\gamma$  = 12:85:3). The assignment of the compound was achieved by comparison with the literature.<sup>3</sup>

**<sup>1</sup>H NMR (CDCl<sub>3</sub>, 400 MHz):**  $\delta$  = 7.66 (d,  $J$  = 8.7 Hz, 1H <sup>$\gamma$</sup> ), 7.62 (d,  $J$  = 7.9 Hz, 1H <sup>$\alpha$</sup> ), 7.14 (s, 1H <sup>$\beta$</sup> ), 7.05 (s, 1H <sup>$\beta$</sup> ), 6.82 (d,  $J$  = 2.9 Hz, 1H <sup>$\gamma$</sup> ), 6.67 (s, 1H <sup>$\beta$</sup> ), 6.66-6.65 (m, 1H <sup>$\alpha$</sup> ), 6.57- 6.56 (m, 1H <sup>$\alpha$</sup> ), 6.48 (dd,  $J$  = 8.7, 2.9, 1H <sup>$\gamma$</sup> ), 3.86 (s, 3H <sup>$\alpha$</sup> ), 3.77 (s, 3H <sup>$\gamma$</sup> ), 3.76 (s, 3H <sup>$\beta$</sup> ), 2.40 (s, 3H <sup>$\gamma$</sup> ), 2.33 (s, 3H <sup>$\alpha$</sup> ), 2.28 (s, 3H <sup>$\beta$</sup> ) ppm.

**<sup>13</sup>C NMR (CDCl<sub>3</sub>, 100 MHz):**  $\delta$  = 160.1, 158.0, 141.3, 140.0, 139.5, 139.1, 130.8, 123.5, 120.1, 116.0, 114.9, 113.5, 112.2, 111.1, 94.3, 82.0, 56.3, 55.5, 55.4, 28.4, 21.6, 21.2 ppm.

Product contains 6% diiodinated arene **1a**.



**$^1\text{H}$  NMR spectrum in  $\text{CDCl}_3$ :**

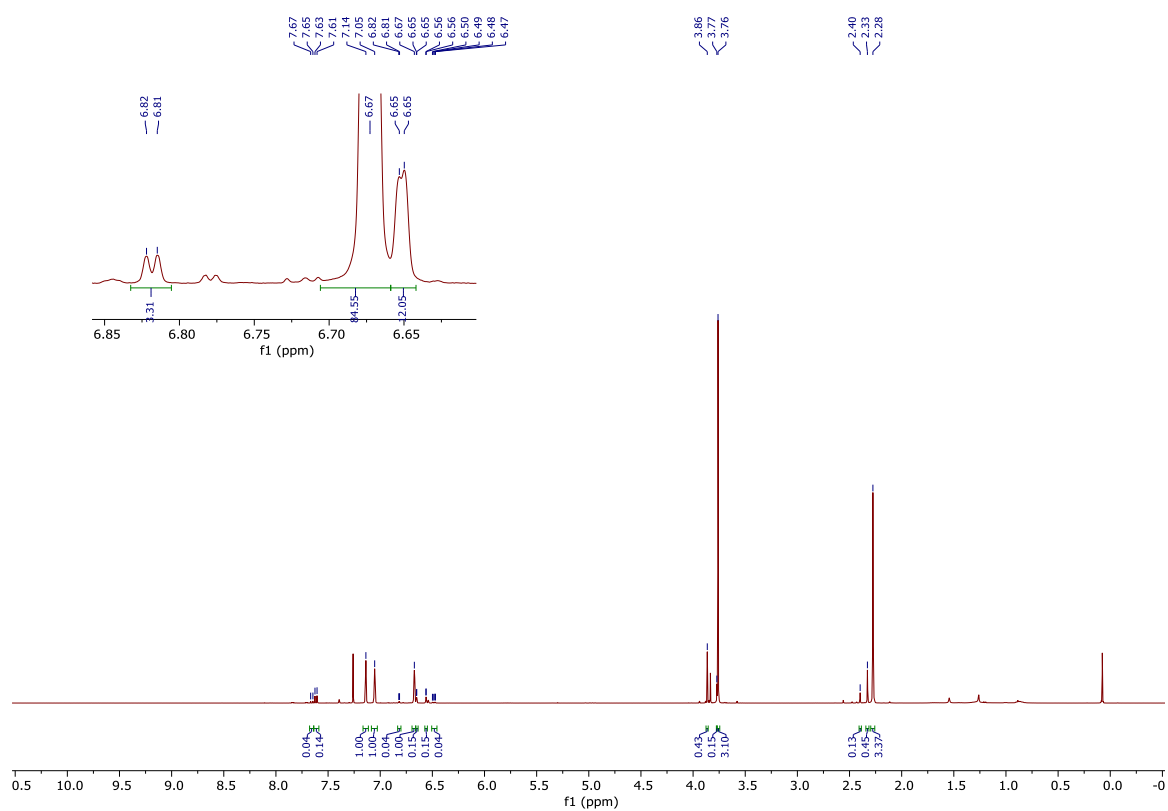

**$^{13}\text{C}$  NMR spectrum in  $\text{CDCl}_3$ :**

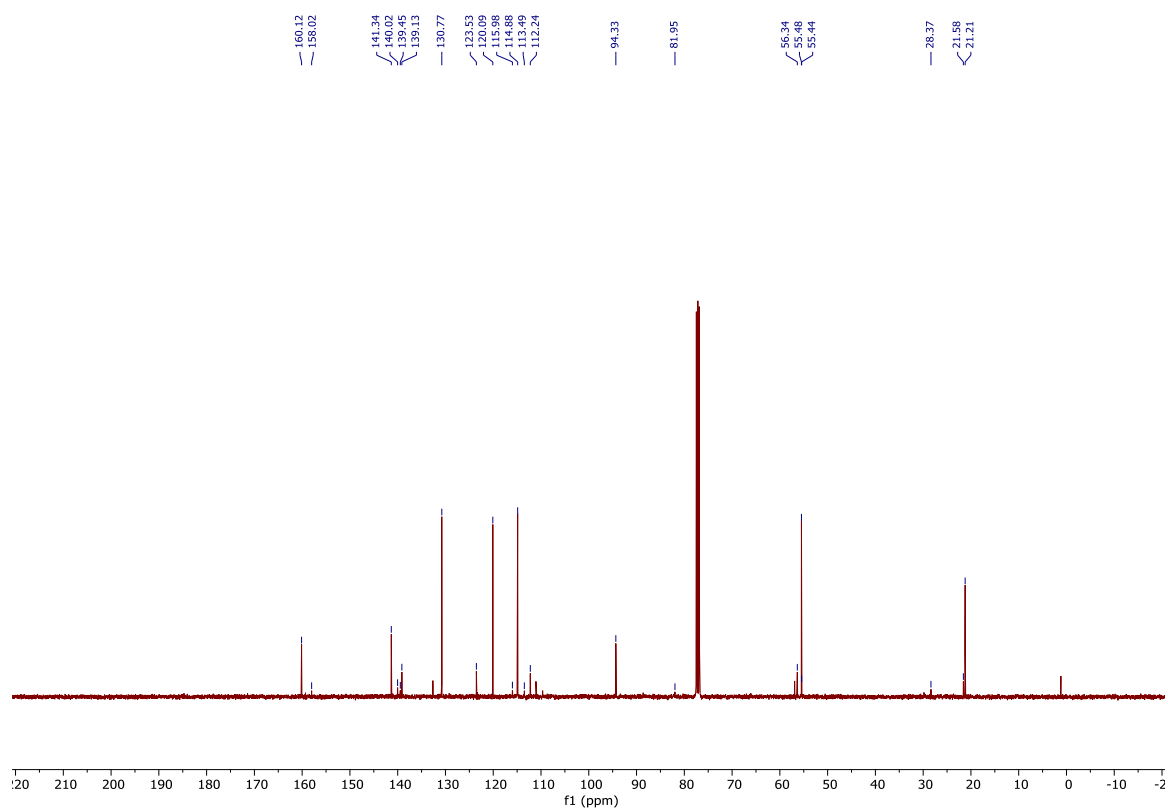

### 2-iodonaphthalene (**3b**)

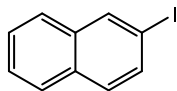

Following the general procedure B, using 1-iodo-2-nitrobenzene (**2**) (150 mg, 0.600 mmol, 3.0 equiv.), naphthalene (**1b**) (25.6 mg, 0.200 mmol), and purification via silica column chromatography using pentane as the eluent, the target compound **3b** was obtained as a yellow liquid (18.3 mg, 36%). The assignment of the compound was achieved by comparison with the literature.<sup>4</sup>

**<sup>1</sup>H NMR (CDCl<sub>3</sub>, 400 MHz):**  $\delta$  = 8.24 (s, 1H), 7.82-7.77 (m, 1H), 7.75-7.69 (m, 2H), 7.58 (d,  $J$  = 8.6 Hz, 1H), 7.54-7.46 (m, 2H) ppm.

**<sup>13</sup>C NMR (CDCl<sub>3</sub>, 100 MHz):**  $\delta$  = 136.8, 135.2, 134.5, 132.3, 129.6, 128.0, 127.0, 126.8, 126.6, 91.6 ppm.

**$^1\text{H}$  NMR spectrum in  $\text{CDCl}_3$ :**

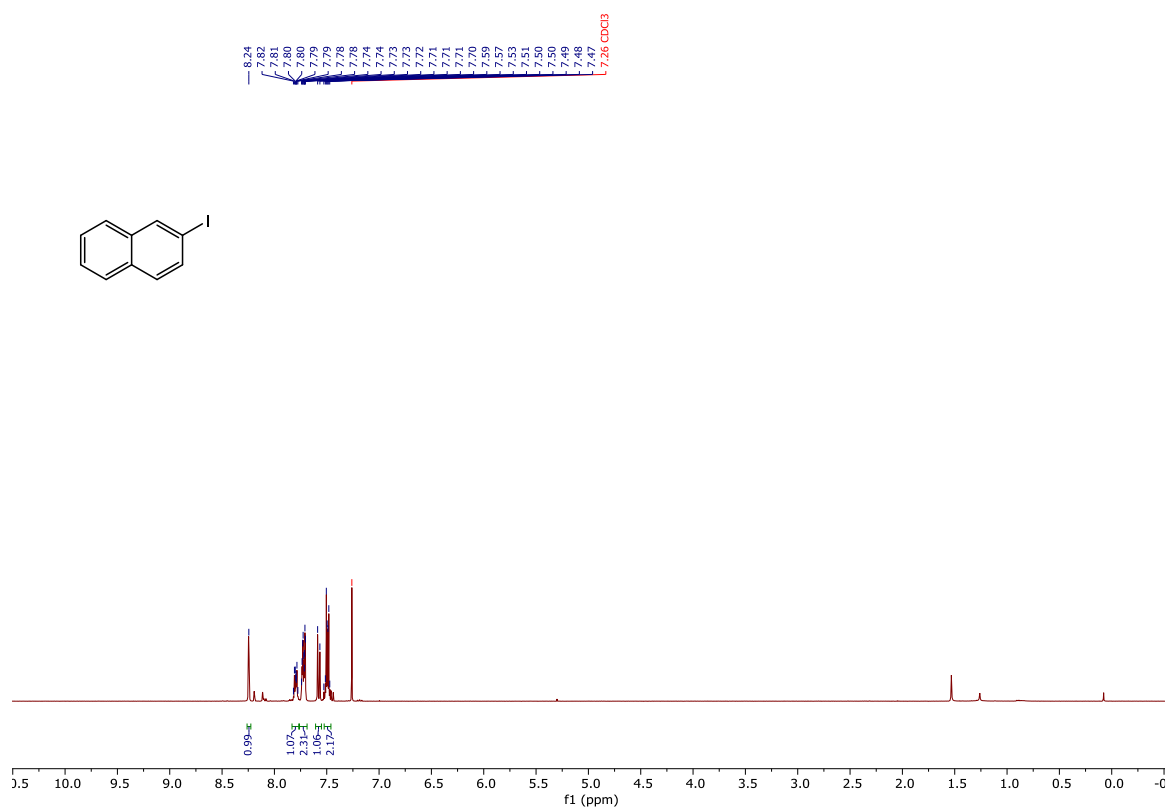

**$^{13}\text{C}$  NMR spectrum in  $\text{CDCl}_3$ :**

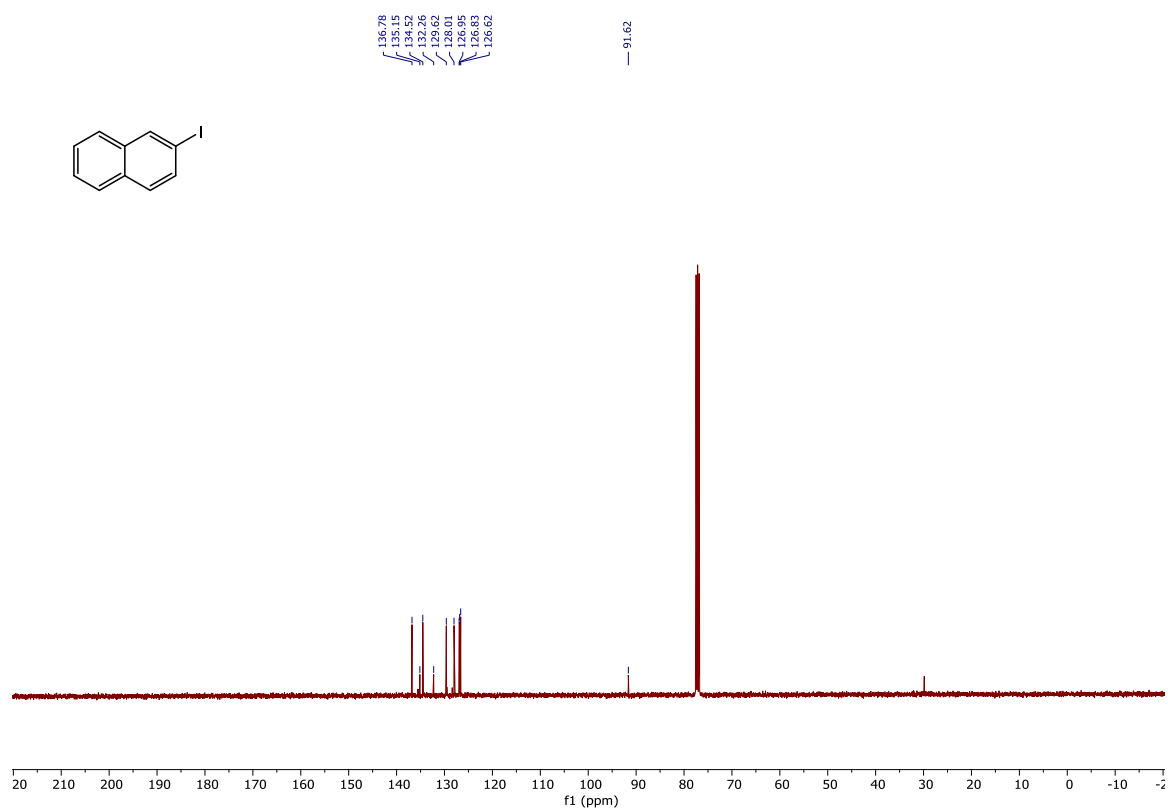

**1-iodo-3-methylbenzene (3c-meta) and 1-iodo-4-methylbenzene (3c-para)**

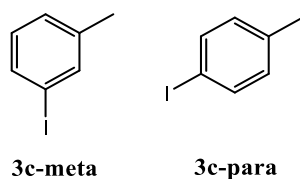

Following the general procedure B<sup>[a]</sup>, using 1-iodo-2-nitrobenzene (**2**) (100 mg, 0.400 mmol, 2.0 equiv.), toluene (**1c**) (25.6 mg, 0.200 mmol), and purification via silica column chromatography using pentane as the eluent, the target compound **3c** was obtained as a colorless liquid (23.6 mg, 54%, m:p = 68:32). The assignment of **3c-meta** and **3c-para** was achieved by comparison with the literature.<sup>4,5</sup>

**<sup>1</sup>H NMR (CDCl<sub>3</sub>, 400 MHz):**  $\delta$  = 7.59-7.53 (m, 1H<sup>m</sup> + 2H<sup>p</sup>), 7.52-7.47 (m, 1H<sup>m</sup>), 7.13 (d,  $J$  = 7.7 Hz, 1H<sup>m</sup>), 6.99 (t,  $J$  = 7.7 Hz, 1H<sup>m</sup>), 6.93 (d,  $J$  = 7.6, 2H<sup>p</sup>), 2.30 (s, 3H<sup>m</sup>), 2.30 (s, 3H<sup>p</sup>) ppm.

**<sup>13</sup>C NMR (CDCl<sub>3</sub>, 100 MHz):**  $\delta$  = 140.4, 138.2, 137.6, 137.4, 134.6, 131.3, 130.1, 128.5, 94.5, 90.3, 21.2, 20.7 ppm.

[a] Reaction was performed at 70 °C and 48 h reaction time.

# <sup>1</sup>H NMR spectrum in CDCl<sub>3</sub>:

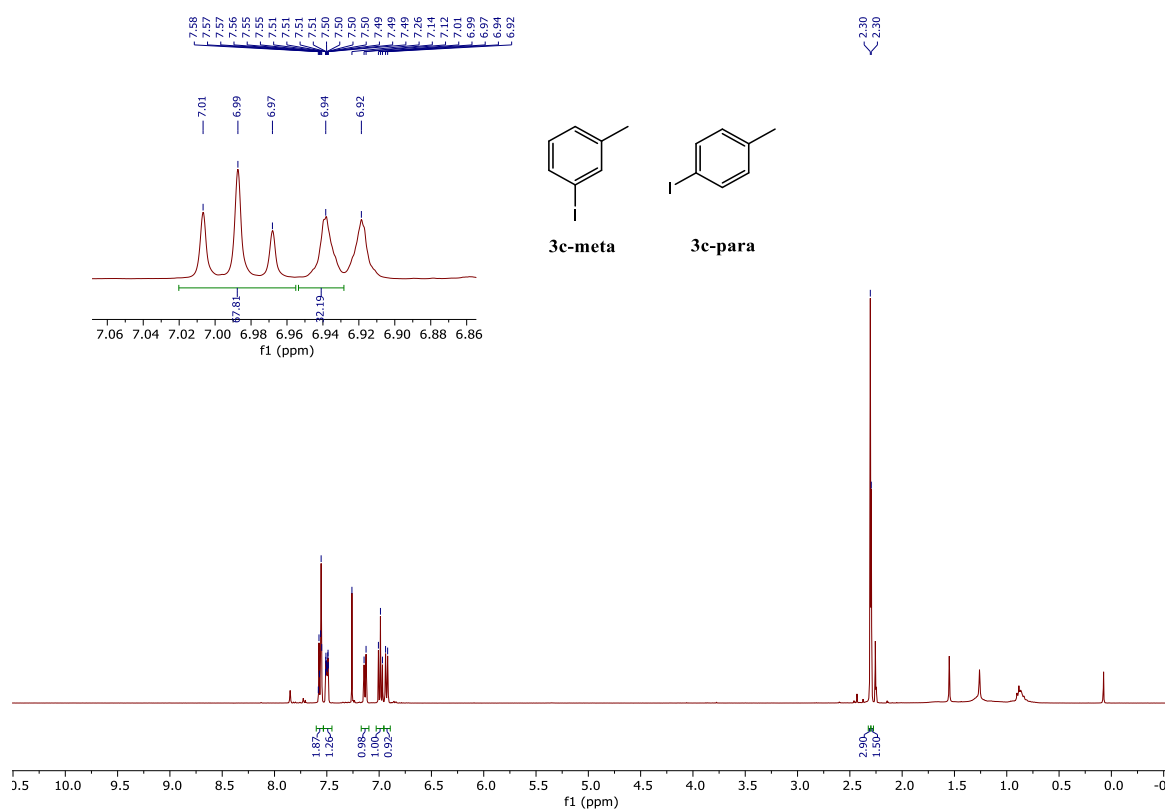

# <sup>13</sup>C NMR spectrum in CDCl<sub>3</sub>:

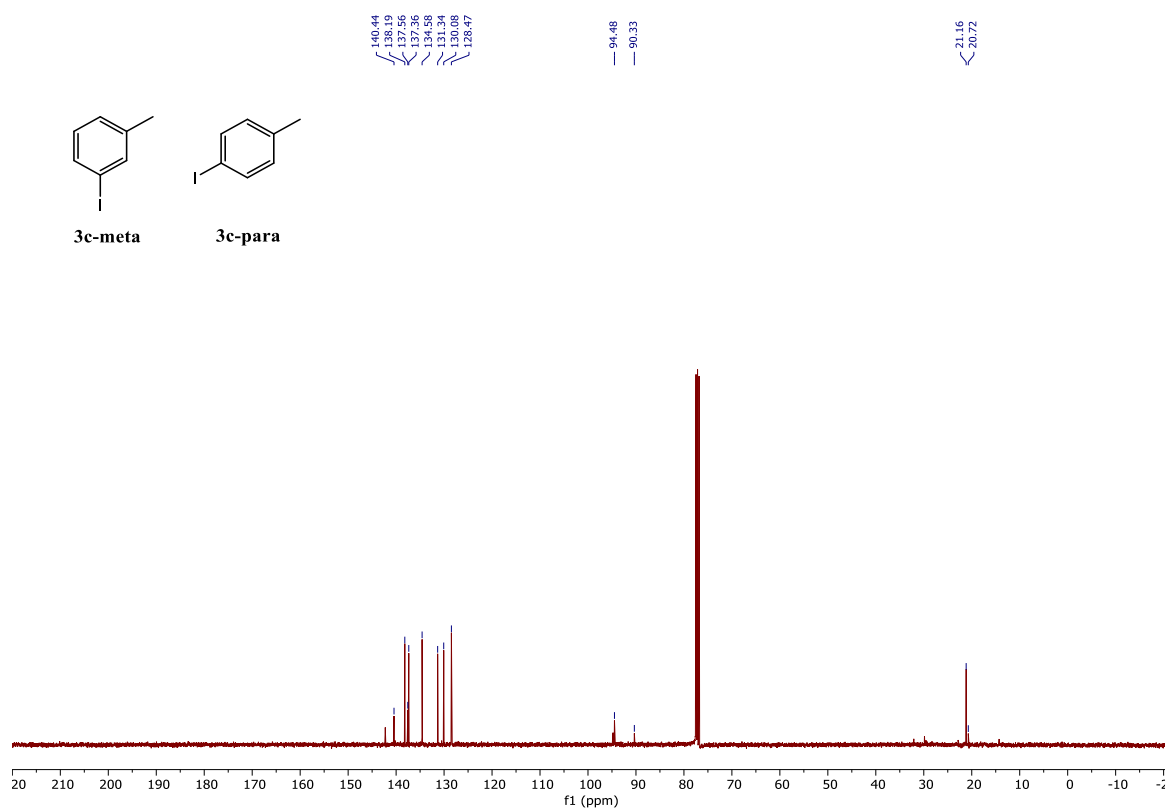

**1-iodo-3-propylbenzene (3d-meta) and 1-iodo-4-propylbenzene (3d-para)**

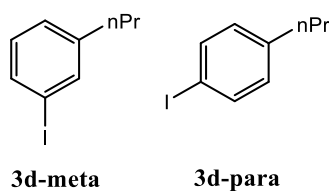

Following the general procedure B<sup>[a]</sup>, using 1-iodo-2-nitrobenzene (**2**) (100 mg, 0.400 mmol, 2.0 equiv.), propylbenzene (**1d**) (24.0 mg, 0.200 mmol), and purification via silica column chromatography using pentane as the eluent, the target compound **3d** was obtained as a colorless liquid (31.5 mg, 64%, m:p = 72:28).

**<sup>1</sup>H NMR (CDCl<sub>3</sub>, 400 MHz):**  $\delta$  = 7.61-7.56 (m, 2H<sup>p</sup>), 7.56-7.47 (m, 2H<sup>m</sup>), 7.16-7.11 (m, 1H<sup>m</sup>), 7.01 (t,  $J$  = 7.7 Hz, 1H<sup>m</sup>), 6.96-6.90 (m, 2H<sup>p</sup>), 2.56-2.43 (m, 2H<sup>m</sup>+2H<sup>p</sup>), 1.68-1.56 (m, 2H<sup>m</sup>+2H<sup>p</sup>), 0.98-0.87 (m, 3H<sup>m</sup> + 3H<sup>p</sup>) ppm.

**<sup>13</sup>C NMR (CDCl<sub>3</sub>, 100 MHz):**  $\delta$  = 145.3, 137.6, 137.4, 137.0, 134.9, 130.8, 130.1, 127.9, 94.5, 90.7, 37.7(1), 37.6(5), 24.5, 24.3, 13.9, 13.8 ppm.

**HRMS (EI pos) m/z:** Calcd for C<sub>9</sub>H<sub>11</sub>I<sup>+</sup> 245,9905, Found 245,9907.

[a] Reaction was performed at 70 °C and 48 h reaction time.

# <sup>1</sup>H NMR spectrum in CDCl<sub>3</sub>:

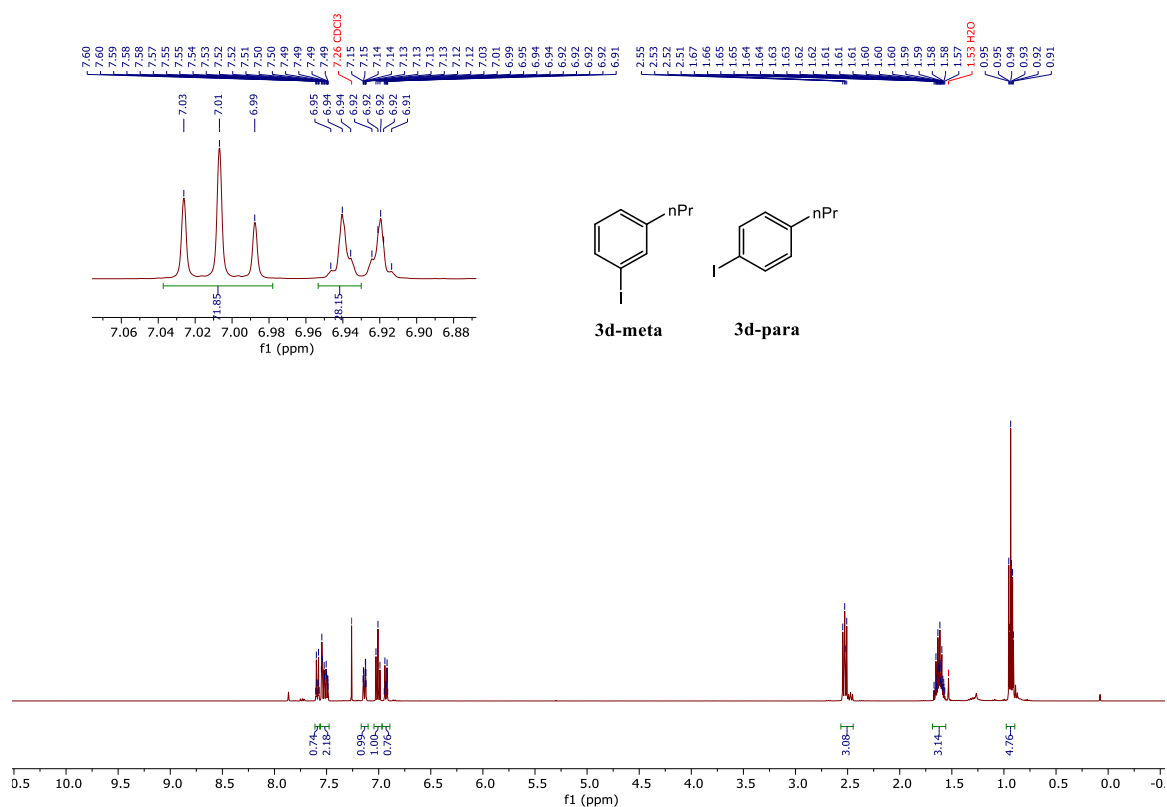

# <sup>13</sup>C NMR spectrum in CDCl<sub>3</sub>:

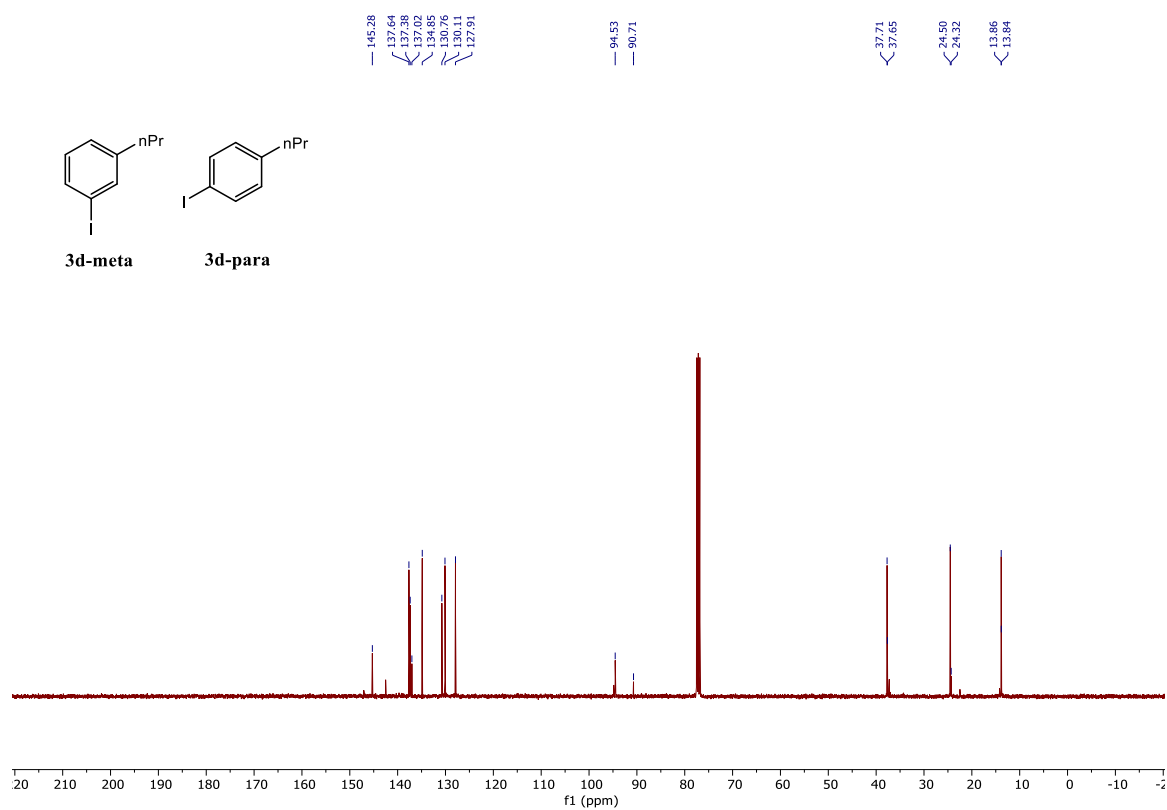

***tert*-butyl(3-iodophenyl)dimethylsilane (3e-meta) and *tert*-butyl(4-iodophenyl)dimethylsilane (3e-para)**

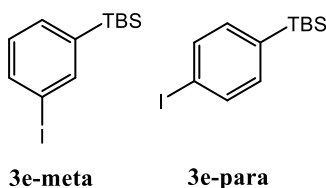

Following the general procedure B<sup>[a]</sup>, using 1-iodo-2-nitrobenzene (**2**) (100 mg, 0.400 mmol, 2.0 equiv.), *tert*-butyldimethyl(phenyl)silane (**1e**) (38.5 mg, 0.200 mmol), and purification via silica column chromatography using pentane as the eluent, the target compound **3e** was obtained as a colorless oil (30.6 mg, 48%, m:p = 82:18).

**<sup>1</sup>H NMR (CDCl<sub>3</sub>, 400 MHz):**  $\delta$  = 7.81-7.79 (m, 1H<sup>m</sup>), 7.71-7.67 (m, 1H<sup>m</sup>+2H<sup>p</sup>), 7.45 (dt,  $J$  = 7.3, 1.1 Hz, 1H<sup>m</sup>), 7.25-7.20 (m, 2H<sup>p</sup>), 7.09 (t,  $J$  = 7.6 Hz, 1H<sup>m</sup>), 0.89-0.86 (m, 9H<sup>m</sup>+ 9H<sup>p</sup>), 0.27-0.24 (m, 6H<sup>m</sup>+6H<sup>p</sup>) ppm.

**<sup>13</sup>C NMR (CDCl<sub>3</sub>, 100 MHz):**  $\delta$  = 143.1, 142.0, 141.7, 137.8, 136.7, 136.3, 133.5, 129.6, 96.0, 95.4, 26.6, 26.5, 17.0, 16.9, -6.1, -6.2 ppm.

**HRMS (EI pos) m/z:** Calcd for C<sub>12</sub>H<sub>19</sub>ISi<sup>+</sup> 318.0295, Found 318.0295.

Due to coelution of the para-isomer with substrate **1e** as well as with di-iodinated substrate a meta to para ratio significantly different from the expected statistical meta to para ratio of 2:1 resulted.

[a] Reaction was performed at 70 °C and 48 h reaction time.



# <sup>1</sup>H NMR spectrum in CDCl<sub>3</sub>:

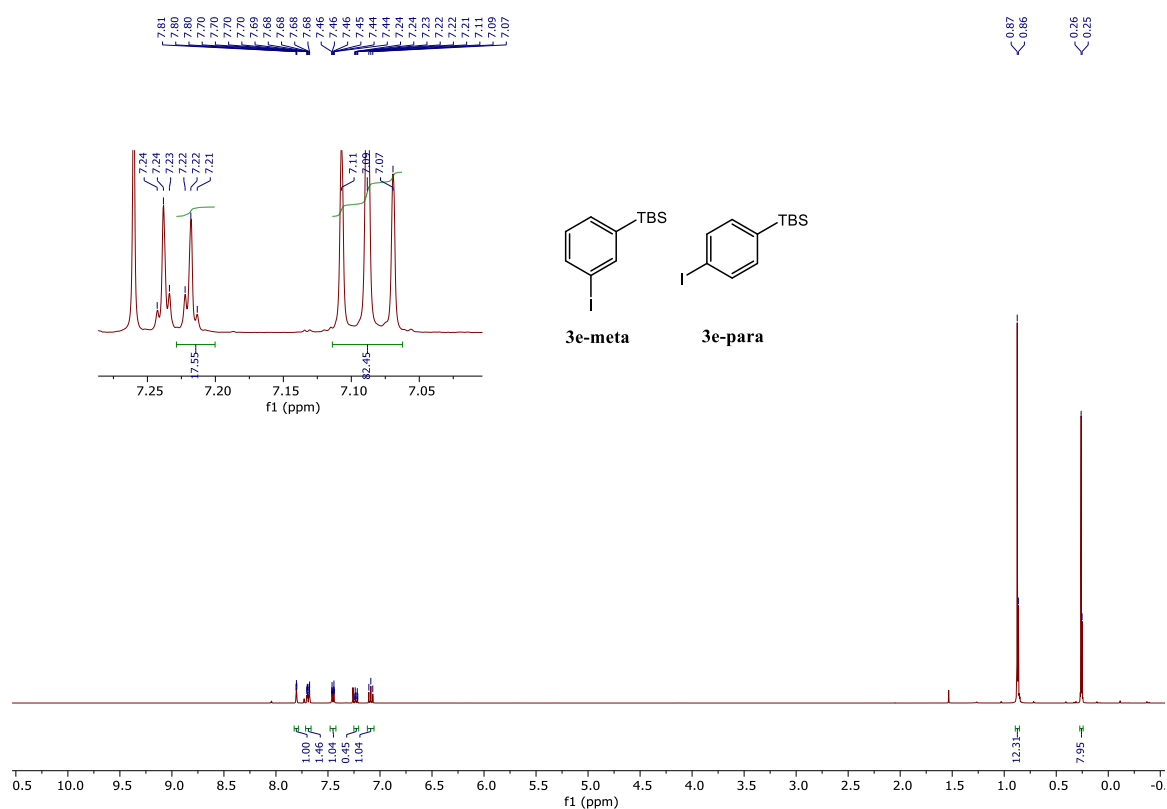

# <sup>13</sup>C NMR spectrum in CDCl<sub>3</sub>:

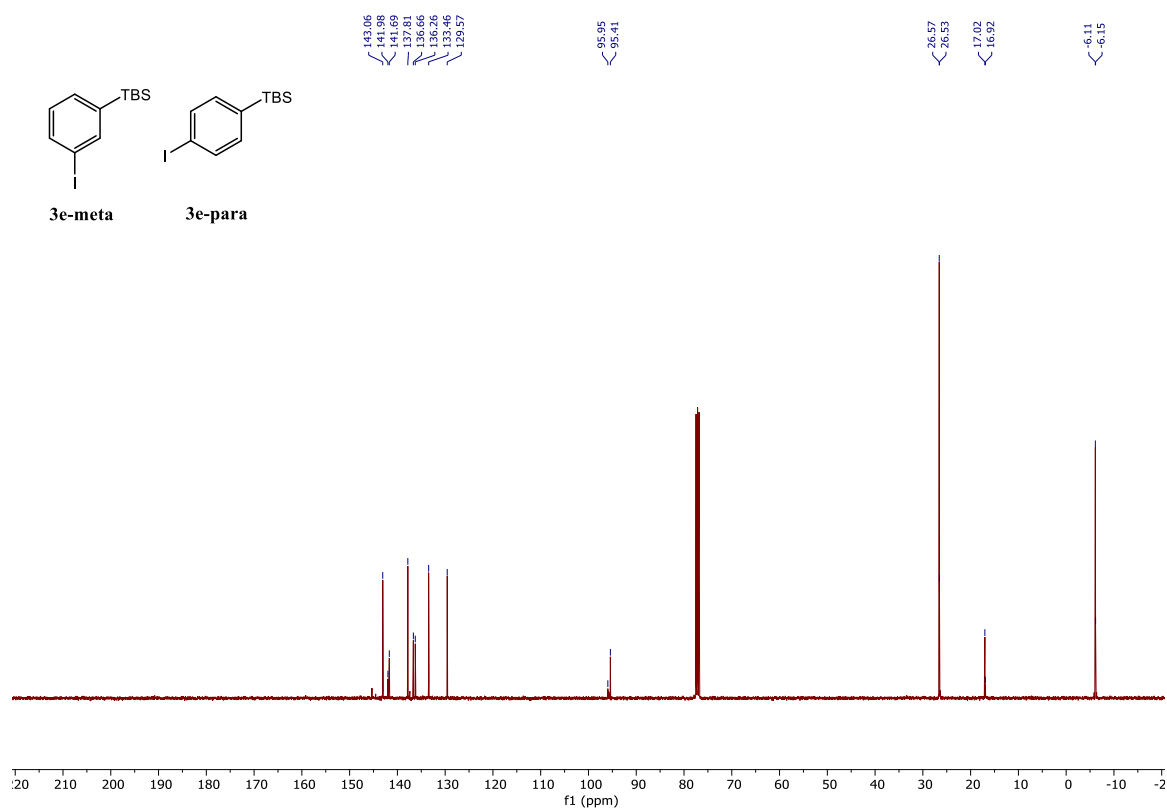

**1-chloro-3-iodobenzene (3f-meta) and 1-chloro-4-iodobenzene (3f-para)**

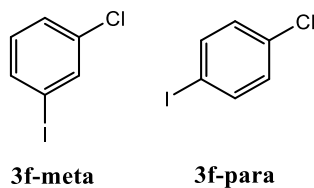

Following the general procedure B, using 1-iodo-2-nitrobenzene (**2**) (150 mg, 0.600 mmol, 3.0 equiv.), chlorobenzene (**1f**) (22.5 mg, 0.200 mmol), and purification via silica column chromatography using pentane as the eluent, the target compound **3f** was obtained as a colorless liquid (23.3 mg, 49%, m:p = 62:38). ). The assignment of **3f-meta** and **3f-para** was achieved by comparison with the literature.<sup>4,6</sup>

**<sup>1</sup>H NMR (CDCl<sub>3</sub>, 400 MHz):**  $\delta$  = 7.72 (t,  $J$  = 1.8 Hz, 1H<sup>m</sup>), 7.63-7.57 (m, 1H<sup>m</sup>+2H<sup>p</sup>), 7.34-7.30 (m, 1H<sup>m</sup>), 7.11-7.06 (m, 2H<sup>p</sup>), 7.03 (t,  $J$  = 8.0 Hz, 1H<sup>m</sup>) ppm.

**<sup>13</sup>C NMR (CDCl<sub>3</sub>, 100 MHz):**  $\delta$  = 138.9, 137.3, 135.8, 135.2, 134.4, 131.1, 130.7, 128.1, 94.2, 91.3 ppm.

# <sup>1</sup>H NMR spectrum in CDCl<sub>3</sub>:

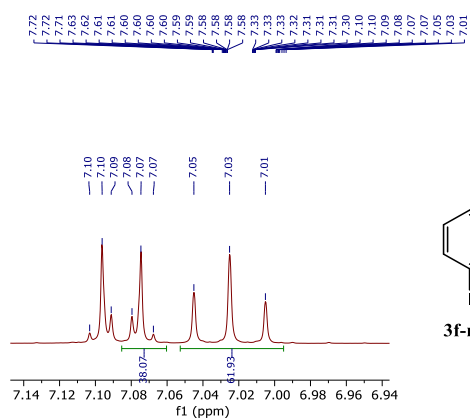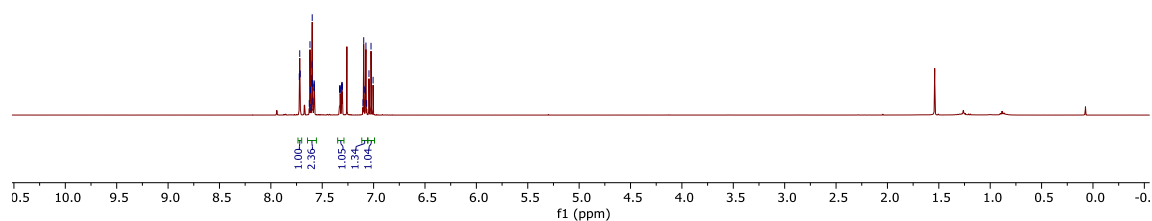

# <sup>13</sup>C NMR spectrum in CDCl<sub>3</sub>:

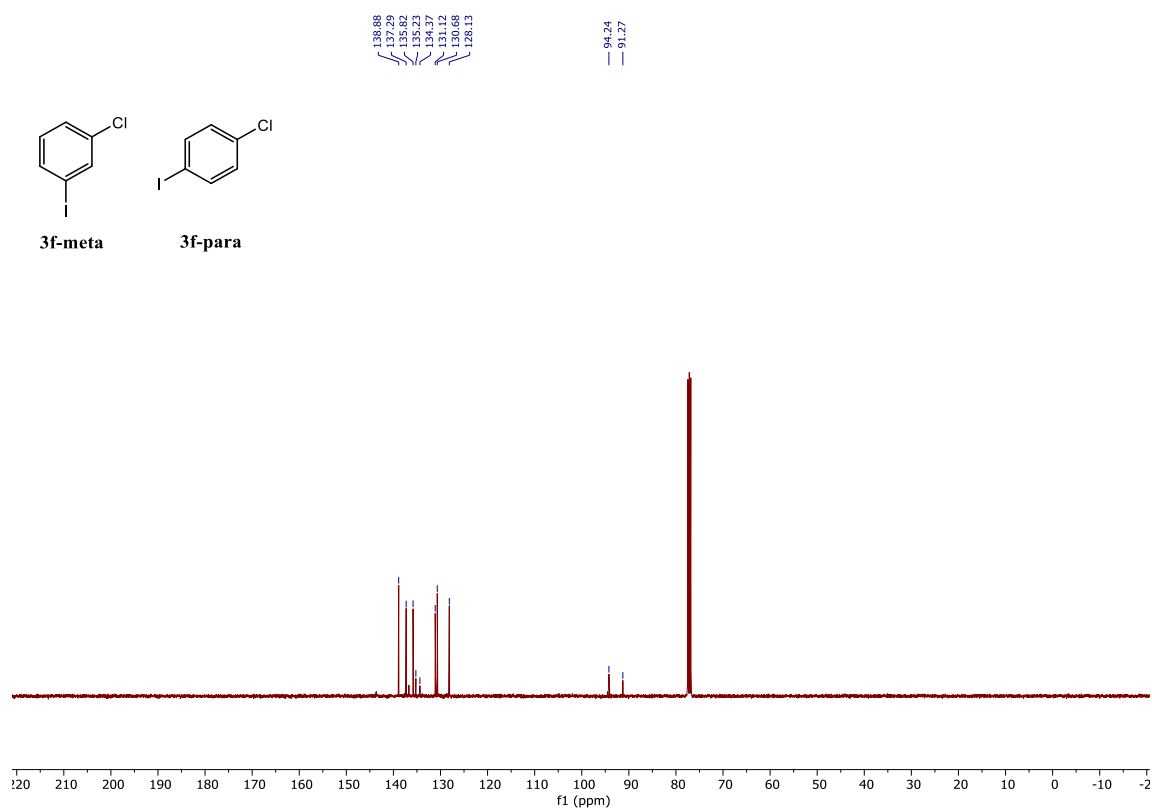

**1-bromo-3-iodobenzene (3g-meta) and 1-bromo-4-iodobenzene (3g-para)**

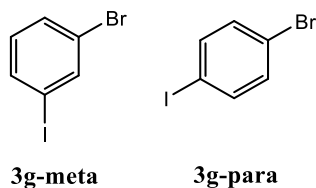

Following the general procedure B, using 1-iodo-2-nitrobenzene (**2**) (150 mg, 0.600 mmol, 3.0 equiv.), bromobenzene (**1g**) (31.4 mg, 0.200 mmol), and purification via silica column chromatography using pentane as the eluent, the target compound **3g** was obtained as a colorless liquid (30.8 mg, 55%, m:p = 67:33). The assignment of **3g-meta** and **3g-para** was achieved by comparison with the literature.<sup>6,7</sup>

**<sup>1</sup>H NMR (CDCl<sub>3</sub>, 400 MHz):**  $\delta$  = 7.87 (t,  $J$  = 1.8 Hz, 1H<sup>m</sup>), 7.65-7.62 (m, 1H<sup>m</sup>), 7.57-7.52 (m, 2H<sup>p</sup>), 7.49-7.45 (m, 1H<sup>m</sup>), 7.25-7.21 (m, 2H<sup>p</sup>), 6.97 (t,  $J$  = 8.0 Hz, 1H<sup>m</sup>) ppm.

**<sup>13</sup>C NMR (CDCl<sub>3</sub>, 100 MHz):**  $\delta$  = 139.9, 139.2, 136.2, 133.6, 131.5, 131.0, 123.3, 122.4, 94.6, 92.2 ppm.

# <sup>1</sup>H NMR spectrum in CDCl<sub>3</sub>:

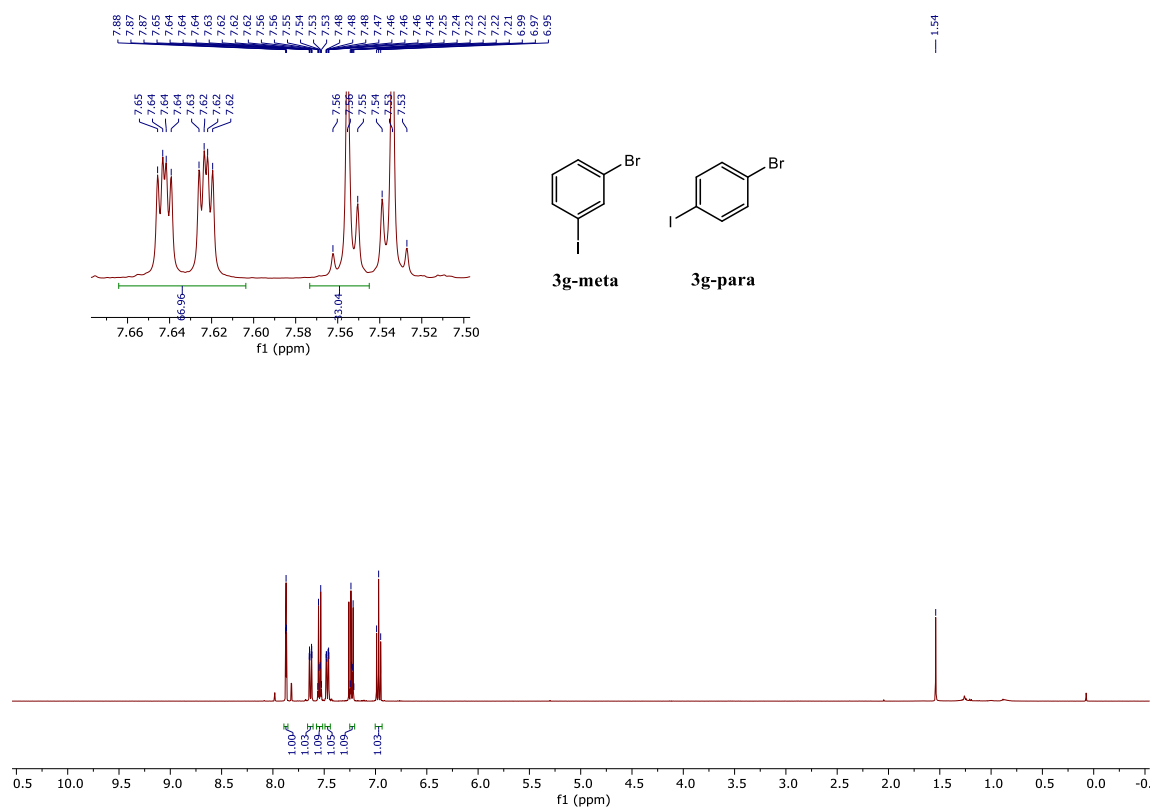

# <sup>13</sup>C NMR spectrum in CDCl<sub>3</sub>:

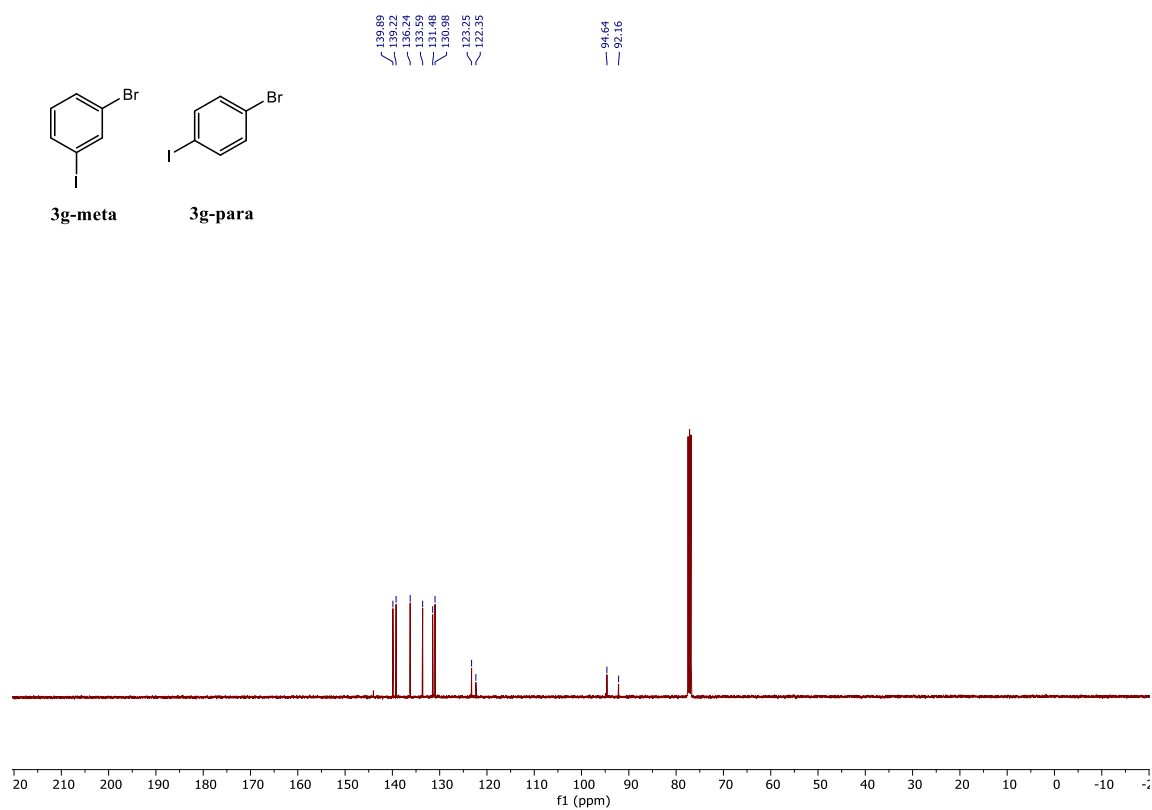

**ethyl 3-iodobenzoate (3h-meta) and ethyl 4-iodobenzoate (3h-para)**

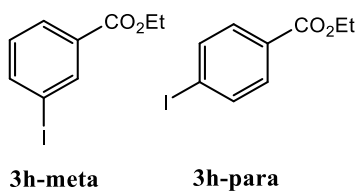

Following the general procedure B<sup>[a]</sup>, using 1-iodo-2-nitrobenzene (**2**) (200 mg, 0.800 mmol, 4.0 equiv.), ethyl benzoate (**1h**) (30.0 mg, 0.200 mmol), and purification via silica column chromatography using pentane:CH<sub>2</sub>Cl<sub>2</sub> = 4:1 as the eluent, the target compound **3h** was obtained as a yellow oil (19.3 mg, 35%, m:p = 75:25). The assignment of **3h-meta** and **3h-para** was achieved by comparison with the literature.<sup>6,8</sup>

**<sup>1</sup>H NMR (CDCl<sub>3</sub>, 400 MHz):**  $\delta$  = 8.38 (t,  $J$  = 1.7 Hz, 1H<sup>m</sup>), 8.03-7.99 (m, 1H<sup>m</sup>), 7.90-7.86 (m, 1H<sup>m</sup>), 7.82-7.73 (m, 4H<sup>p</sup>), 7.18 (t,  $J$  = 7.8 Hz, 1H<sup>m</sup>), 4.43-4.33 (m, 2H<sup>m</sup>+2H<sup>p</sup>), 1.44-1.36 (m, 3H<sup>m</sup>+3H<sup>p</sup>) ppm.

**<sup>13</sup>C NMR (CDCl<sub>3</sub>, 100 MHz):**  $\delta$  = 166.3, 165.3, 141.8, 138.6, 137.8, 132.6, 131.2, 130.2, 130.1, 128.9, 100.7, 93.9, 61.5, 61.4, 14.4, 14.3 ppm.

[a] Reaction was performed at 100 °C and with 30 mol% AgNO<sub>3</sub> instead of 15 mol% Ag<sub>2</sub>O.

# <sup>1</sup>H NMR spectrum in CDCl<sub>3</sub>:

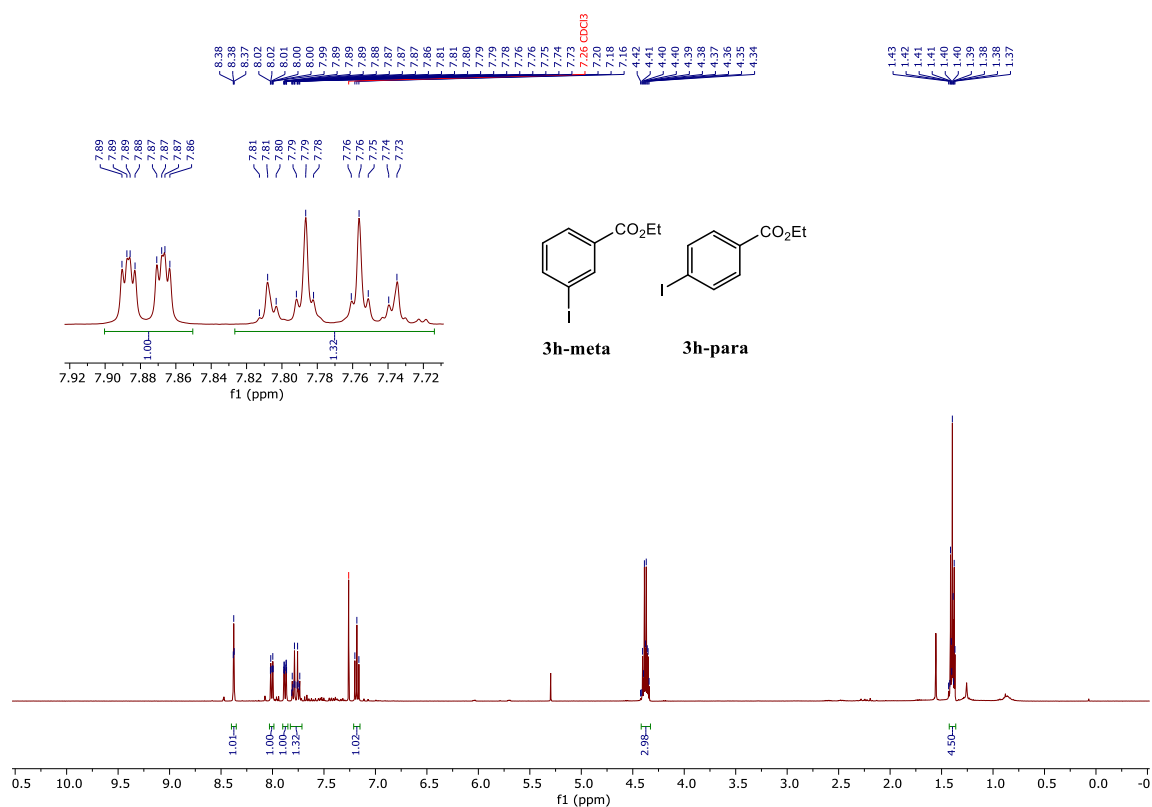

# <sup>13</sup>C NMR spectrum in CDCl<sub>3</sub>:

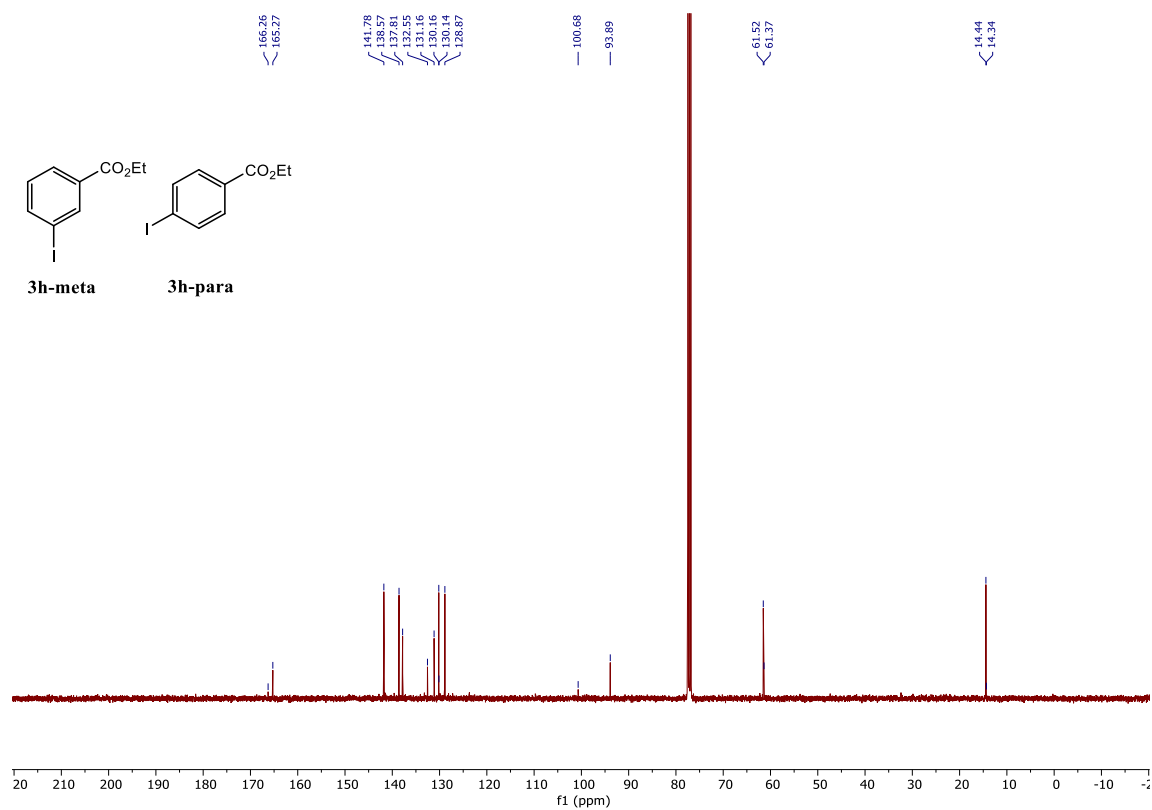

#### 4-iodo-1,2-dimethylbenzene (**3i**)

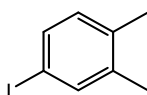

Following the general procedure B<sup>[a]</sup>, using 1-iodo-2-nitrobenzene (**2**) (100 mg, 0.400 mmol, 2.0 equiv.), *ortho*-xylene (**1i**) (21.2 mg, 0.200 mmol), and purification via silica column chromatography using pentane as the eluent, the target compound **3i** was obtained as a colorless liquid (24.2 mg, 52%). The assignment of the compound was achieved by comparison with the literature.<sup>9</sup>

**<sup>1</sup>H NMR (CDCl<sub>3</sub>, 400 MHz):**  $\delta$  = 7.47 (s, 1H), 7.41 (d,  $J$  = 7.9 Hz, 1H), 6.87 (d,  $J$  = 7.9 Hz, 1H), 2.21 (s, 3H), 2.20 (s, 3H) ppm.

**<sup>13</sup>C NMR (CDCl<sub>3</sub>, 100 MHz):**  $\delta$  = 139.2, 138.3, 136.3, 134.9, 131.6, 90.7, 19.6, 19.5 ppm.

[a] Reaction was performed at 70 °C and 48 h reaction time.



**$^1\text{H}$  NMR spectrum in  $\text{CDCl}_3$ :**

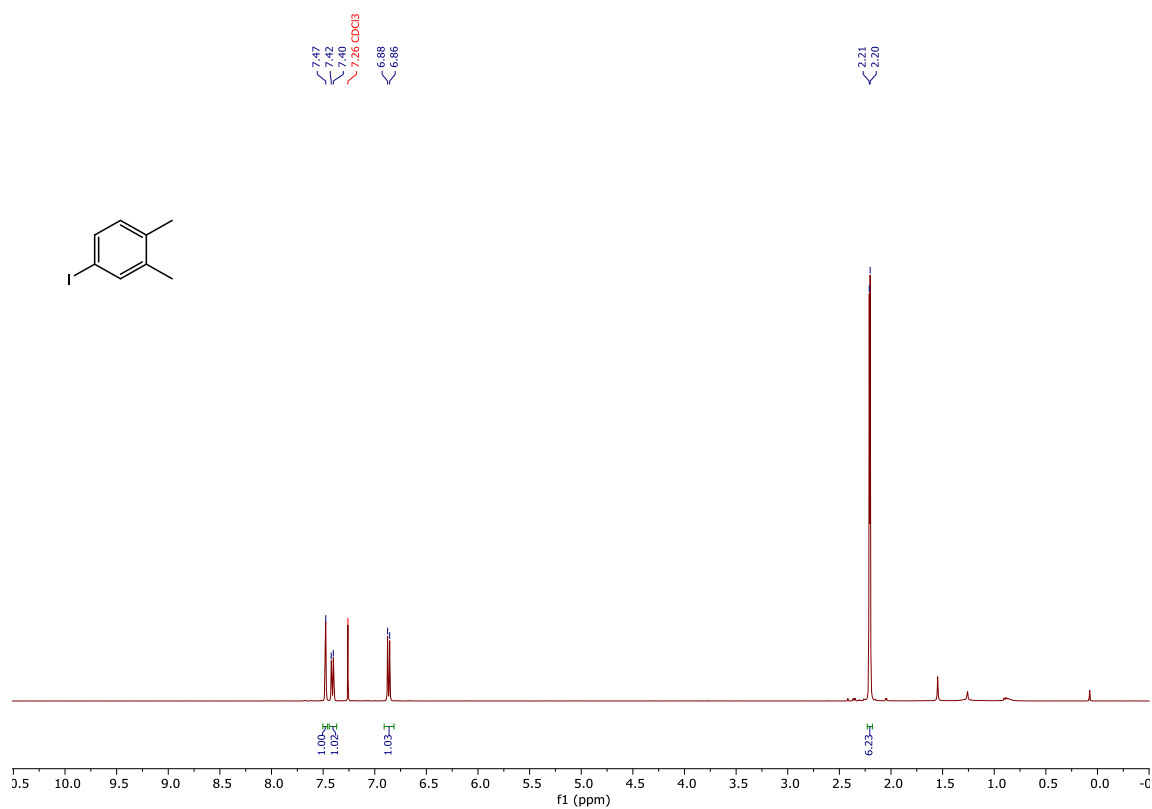

**$^{13}\text{C}$  NMR spectrum in  $\text{CDCl}_3$ :**

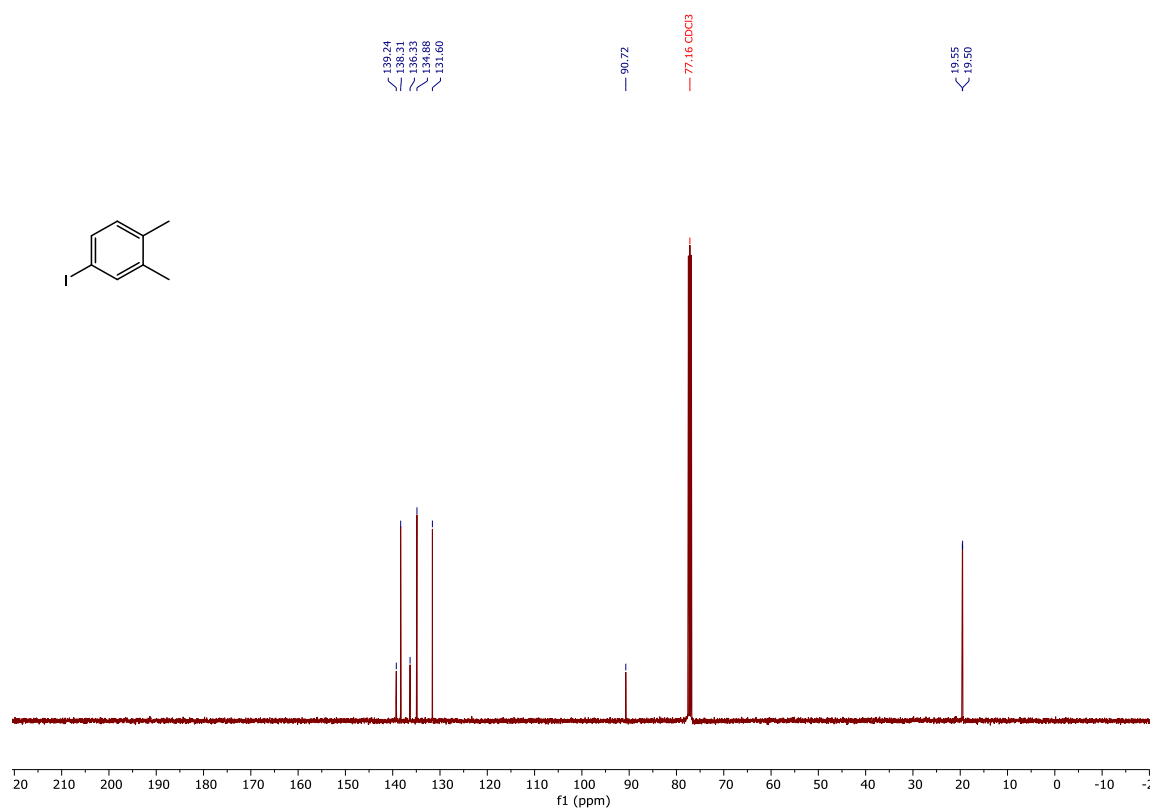

**4-iodo-*N,N*-diisopropyl-2-methylbenzamide (3j-β) and 5-iodo-*N,N*-diisopropyl-2-methylbenzamide (3j-β')**

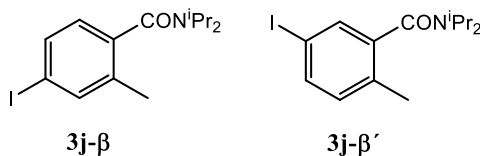

Following the general procedure B, using 1-iodo-2-nitrobenzene (**2**) (150 mg, 0.600 mmol, 3.0 equiv.), *N,N*-diisopropyl-2-methylbenzamide (**1j**) (43.9 mg, 0.200 mmol), and purification via silica column chromatography using pentane:Et<sub>2</sub>O = 4:1 as the eluent, the target compound **3j** was obtained as a colorless solid (38.0 mg, 55%, β:β' = 46:54).

**<sup>1</sup>H NMR (CDCl<sub>3</sub>, 400 MHz):** δ = 7.57 (s, 1H<sup>β'</sup>), 7.56-7.48 (m, 1H<sup>β</sup> + 1H<sup>β'</sup>), 7.40 (d, *J* = 1.9 Hz, 1H<sup>β</sup>), 6.94 (d, *J* = 8.1 Hz, 1H<sup>β</sup>), 6.83 (d, *J* = 8.0 Hz, 1H<sup>β'</sup>), 3.70-3.57 (m, 1H<sup>β</sup> + 1H<sup>β'</sup>), 3.55-3.43 (m, 1H<sup>β</sup> + 1H<sup>β'</sup>), 2.26 (s, 3H<sup>β'</sup>), 2.25 (s, 3H<sup>β</sup>), 1.60-1.51 (m, 6H<sup>β</sup> + 6H<sup>β'</sup>), 1.17-1.03 (m, 6H<sup>β</sup> + 6H<sup>β'</sup>) ppm.

**<sup>13</sup>C NMR (CDCl<sub>3</sub>, 100 MHz):** δ = 169.8, 168.8, 140.9, 139.3, 138.2, 137.2, 136.2, 135.0, 133.4, 132.5, 126.4, 125.7, 93.8, 90.6, 51.0(0), 50.9(5), 46.0(0), 45.9(7), 30.5, 21.0, 20.8(8), 20.8(5), 20.8, 20.7, 20.6(2), 20.6(0), 18.5(9), 18.5(6) ppm.

**HRMS (ESI pos) m/z:** Calcd for C<sub>14</sub>H<sub>20</sub>NOINa<sup>+</sup> 368.0482, Found 368.0480.

# <sup>1</sup>H NMR spectrum in CDCl<sub>3</sub>:

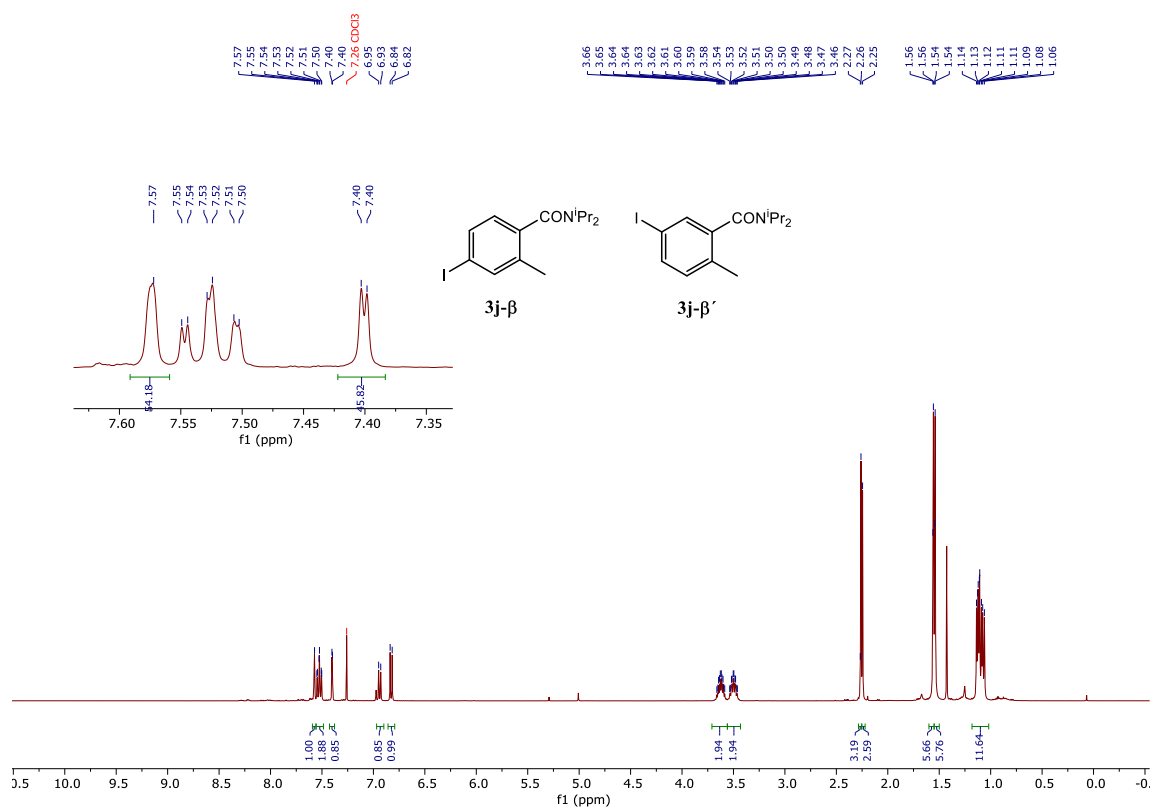

# <sup>13</sup>C NMR spectrum in CDCl<sub>3</sub>:

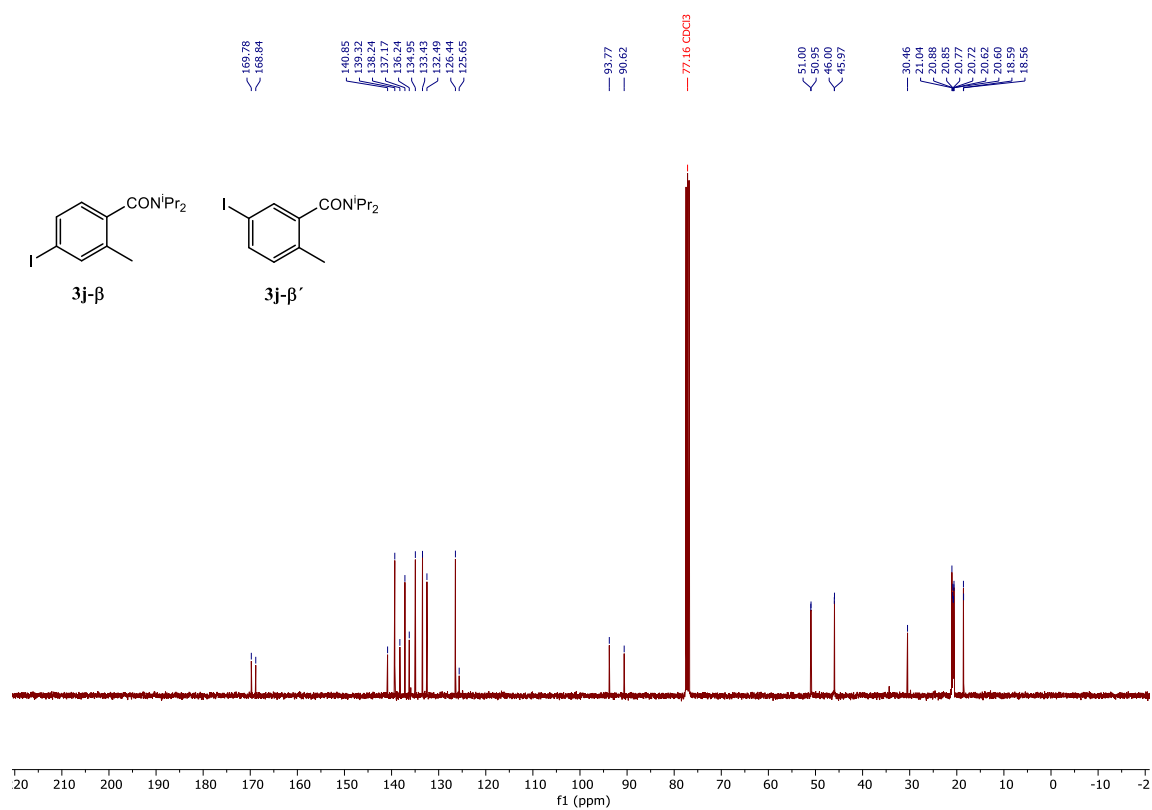

**4-iodo-*N,N*-diisopropyl-2-methylbenzamide (3j'-β) and 5-iodo-*N,N*-diisopropyl-2-methylbenzamide (3j'-β')**

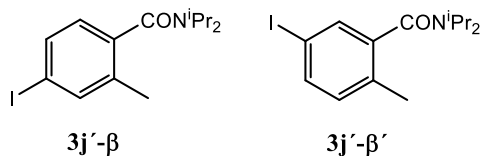

Following the general procedure B<sup>[a]</sup>, using 1-iodo-2-nitrobenzene (**2**) (200 mg, 0.800 mmol, 4.0 equiv.), *N,N*-diisopropyl-2-methylbenzamide (**1j**) (43.9 mg, 0.200 mmol), and purification via silica column chromatography using pentane:Et<sub>2</sub>O = 4:1 as the eluent, the target compound **3j'** was obtained as a colorless solid (39.4 mg, 57%, β:β' = 53:47).

**<sup>1</sup>H NMR (CDCl<sub>3</sub>, 400 MHz):** δ = 7.57 (s, 1H<sup>β'</sup>), 7.56-7.49 (m, 1H<sup>β</sup> + 1H<sup>β'</sup>), 7.40 (d, *J* = 1.9 Hz, 1H<sup>β</sup>), 6.94 (d, *J* = 8.1 Hz, 1H<sup>β</sup>), 6.83 (d, *J* = 7.9 Hz, 1H<sup>β'</sup>), 3.68-3.56 (m, 1H<sup>β</sup> + 1H<sup>β'</sup>), 3.55-3.45 (m, 1H<sup>β</sup> + 1H<sup>β'</sup>), 2.26 (s, 3H<sup>β'</sup>), 2.25 (s, 3H<sup>β</sup>), 1.56-1.53 (m, 6H<sup>β</sup> + 6H<sup>β'</sup>), 1.15-1.04 (m, 6H<sup>β</sup> + 6H<sup>β'</sup>) ppm.

**<sup>13</sup>C NMR (CDCl<sub>3</sub>, 100 MHz):** δ = 169.8, 168.8, 140.9, 139.3, 138.2, 137.2, 136.2, 135.0, 133.4, 132.5, 126.4, 125.7, 93.8, 90.6, 51.0(0), 50.9(5), 46.0(1), 45.9(7), 30.5, 21.0, 20.8(8), 20.8(5), 20.8, 20.7, 20.6(2), 20.6(0), 18.5(9), 18.5(6) ppm.

**HRMS (ESI pos) m/z:** Calcd for C<sub>14</sub>H<sub>20</sub>NOiNa<sup>+</sup> 368.0482, Found 368.0480.

[a] Reaction was performed at 100 °C and with 30 mol% AgNO<sub>3</sub> instead of 15 mol% Ag<sub>2</sub>O.

# <sup>1</sup>H NMR spectrum in CDCl<sub>3</sub>:

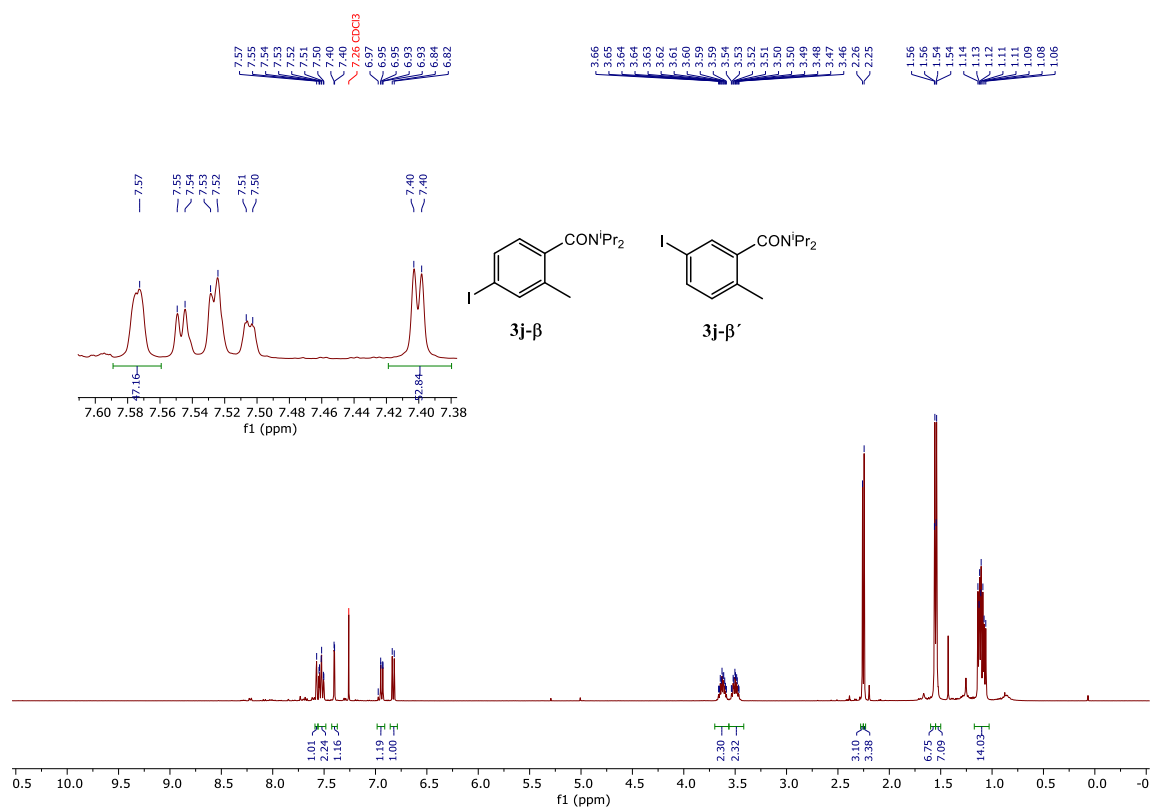

# <sup>13</sup>C NMR spectrum in CDCl<sub>3</sub>:

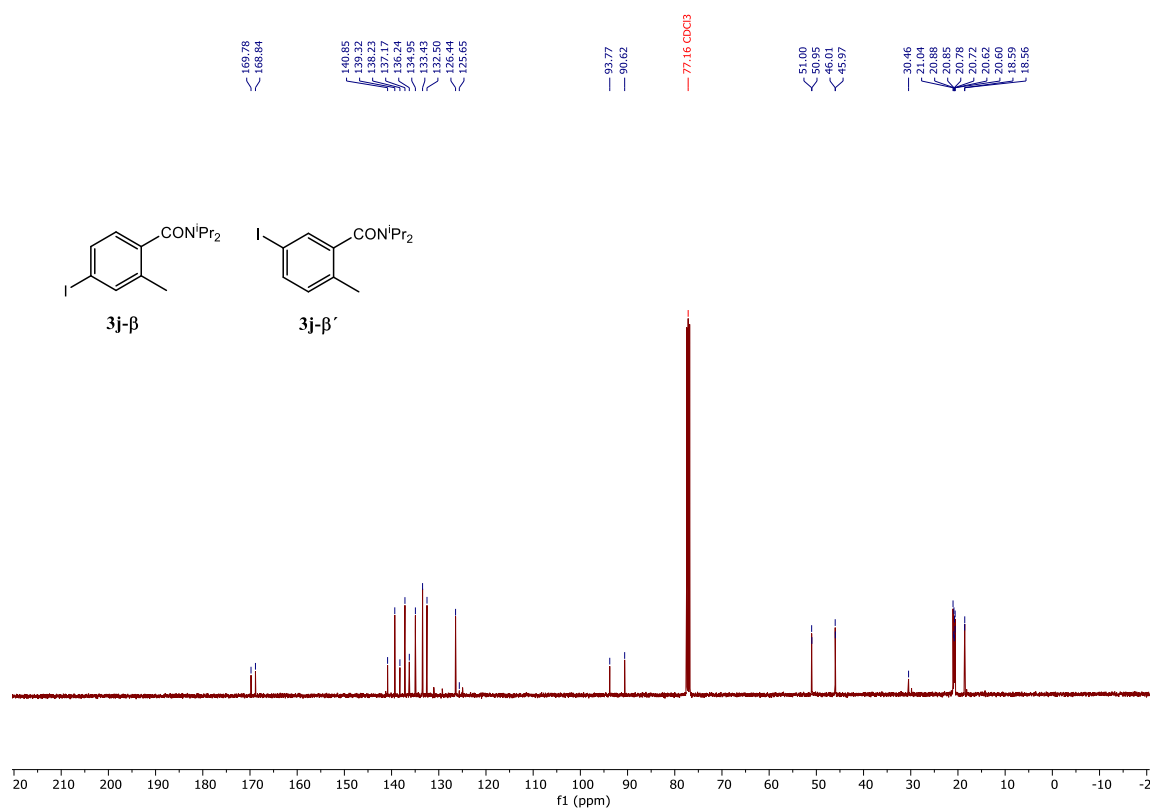

**ethyl 4-iodo-2-methylbenzoate (3k- $\beta$ ) and ethyl 5-iodo-2-methylbenzoate (3k- $\beta'$ )**

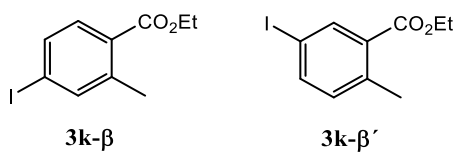

Following the general procedure B<sup>[a]</sup>, using 1-iodo-2-nitrobenzene (**2**) (200 mg, 0.800 mmol, 4.0 equiv.), ethyl 2-methylbenzoate (**1k**) (32.8 mg, 0.200 mmol), and purification via silica column chromatography using pentane:CH<sub>2</sub>Cl<sub>2</sub> = 3:1 as the eluent, the target compound **3k** was obtained as a yellow oil (23.8 mg, 41%,  $\beta$ : $\beta'$  = 38:62).

**<sup>1</sup>H NMR (CDCl<sub>3</sub>, 400 MHz):**  $\delta$  = 8.20 (d,  $J$  = 2.0 Hz, 1H $^{\beta'}$ ), 7.69 (dd,  $J$  = 8.1, 2.0 Hz, 1H $^{\beta'}$ ), 7.66-7.52 (m, 3H $^{\beta}$ ), 6.98 (d,  $J$  = 8.1 Hz, 1H $^{\beta'}$ ), 4.41-4.29 (m, 2H $^{\beta}$ +2H $^{\beta'}$ ), 2.54 (s, 3H $^{\beta}$ ), 2.53 (s, 3H $^{\beta'}$ ), 1.42-1.36 (m, 3H $^{\beta}$ +3H $^{\beta'}$ ) ppm.

**<sup>13</sup>C NMR (CDCl<sub>3</sub>, 100 MHz):**  $\delta$  = 167.3, 166.3, 144.1, 142.2, 140.7(0), 140.6(5), 139.8, 139.2, 135.1, 133.6, 132.0, 129.6, 99.4, 90.0, 61.2, 61.1, 21.5, 21.4, 14.5, 14.4 ppm.

**HRMS (ESI pos) m/z:** Calcd for C<sub>10</sub>H<sub>11</sub>O<sub>2</sub>INa<sup>+</sup> 312.9696, Found 312.9697.

[a] Reaction was performed at 100 °C and with 30 mol% AgNO<sub>3</sub> instead of 15 mol% Ag<sub>2</sub>O.

# <sup>1</sup>H NMR spectrum in CDCl<sub>3</sub>:

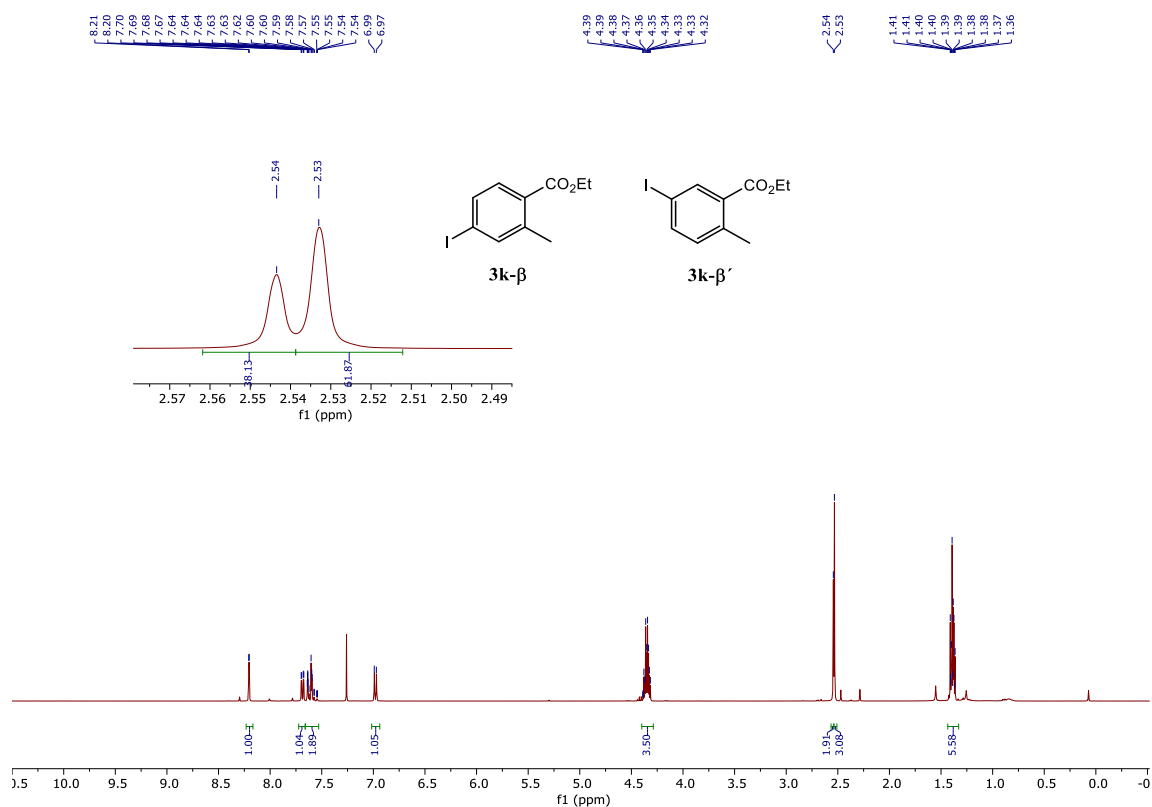

# <sup>13</sup>C NMR spectrum in CDCl<sub>3</sub>:

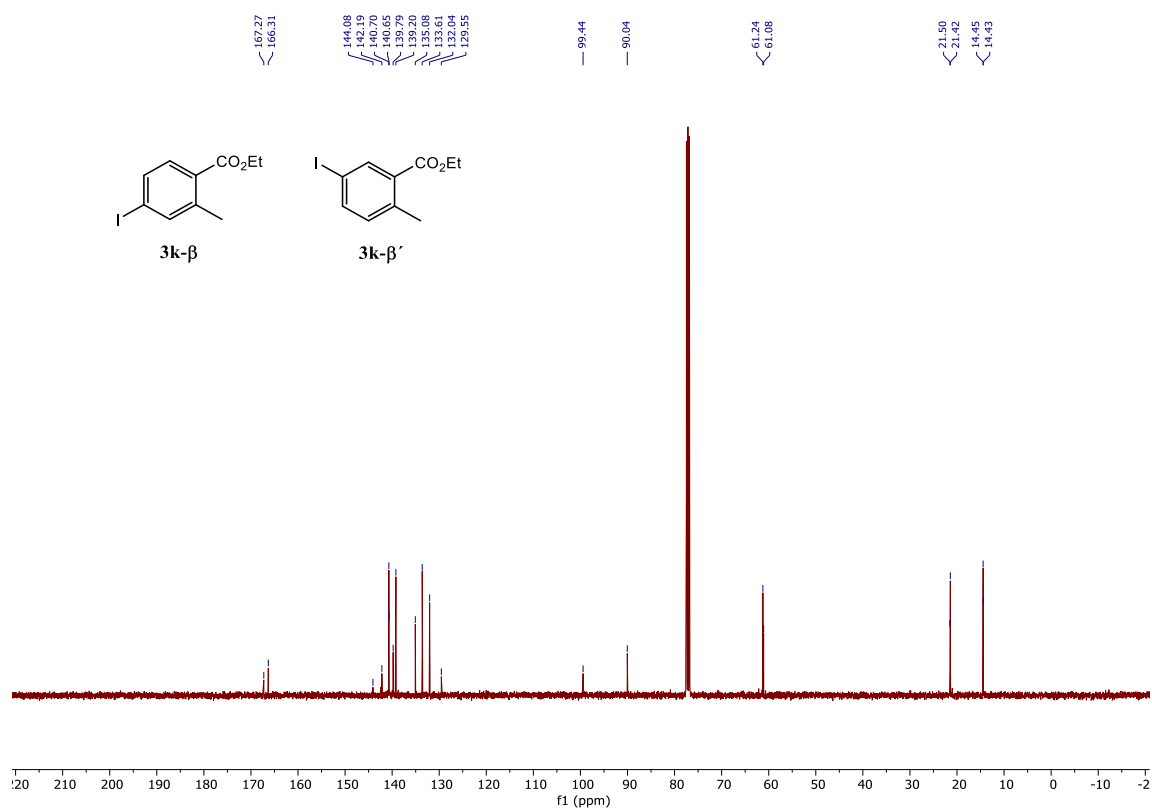

**1-iodo-3,5-dimethylbenzene (3l)**

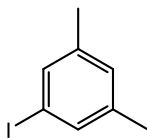

Following the general procedure B, using 1-iodo-2-nitrobenzene (**2**) (150 mg, 0.600 mmol, 3.0 equiv.), *meta*-xylene (**1l**) (21.2 mg, 0.200 mmol), and purification via silica column chromatography using pentane as the eluent, the target compound **3l** was obtained as a colorless liquid (27.6 mg, 60%). The assignment of the compound was achieved by comparison with the literature.<sup>3</sup>

**<sup>1</sup>H NMR (CDCl<sub>3</sub>, 400 MHz):**  $\delta$  = 7.35 (s, 2H), 6.94 (s, 1H), 2.26 (s, 6H) ppm.

**<sup>13</sup>C NMR (CDCl<sub>3</sub>, 100 MHz):**  $\delta$  = 140.1, 135.2, 129.5, 94.4, 21.0 ppm.



**$^1\text{H}$  NMR spectrum in  $\text{CDCl}_3$ :**

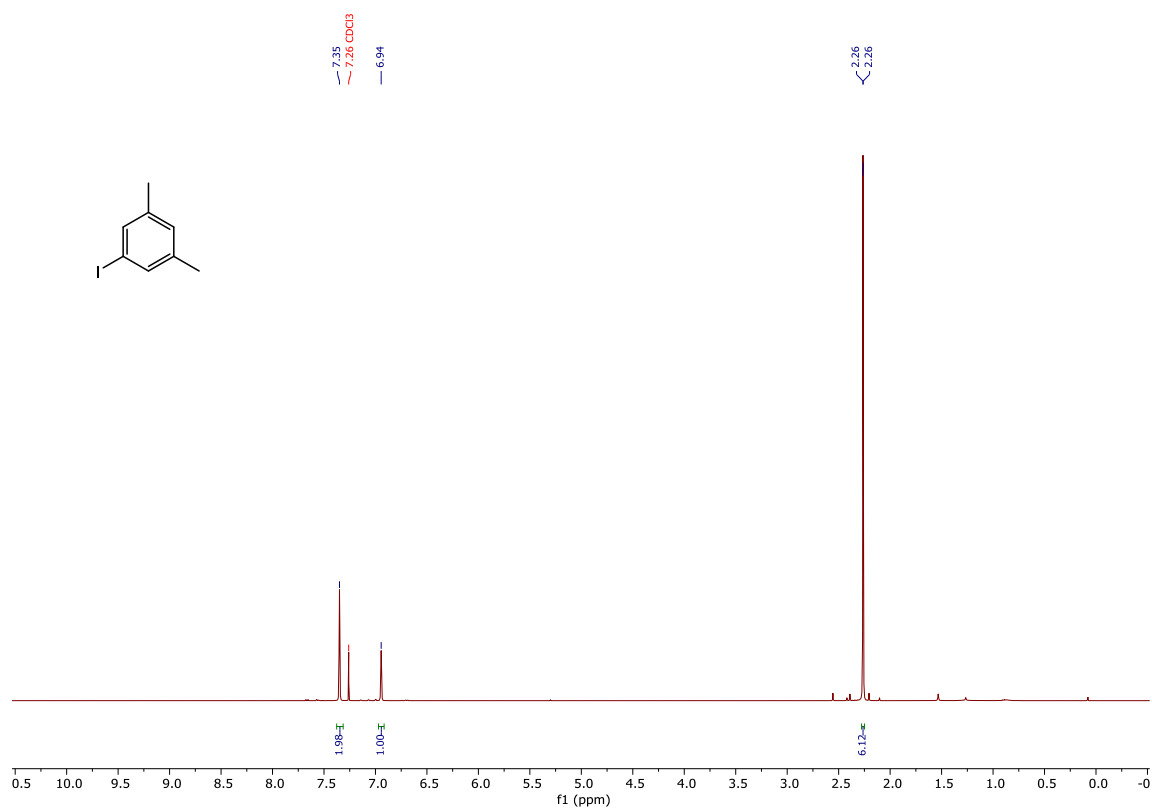

**$^{13}\text{C}$  NMR spectrum in  $\text{CDCl}_3$ :**

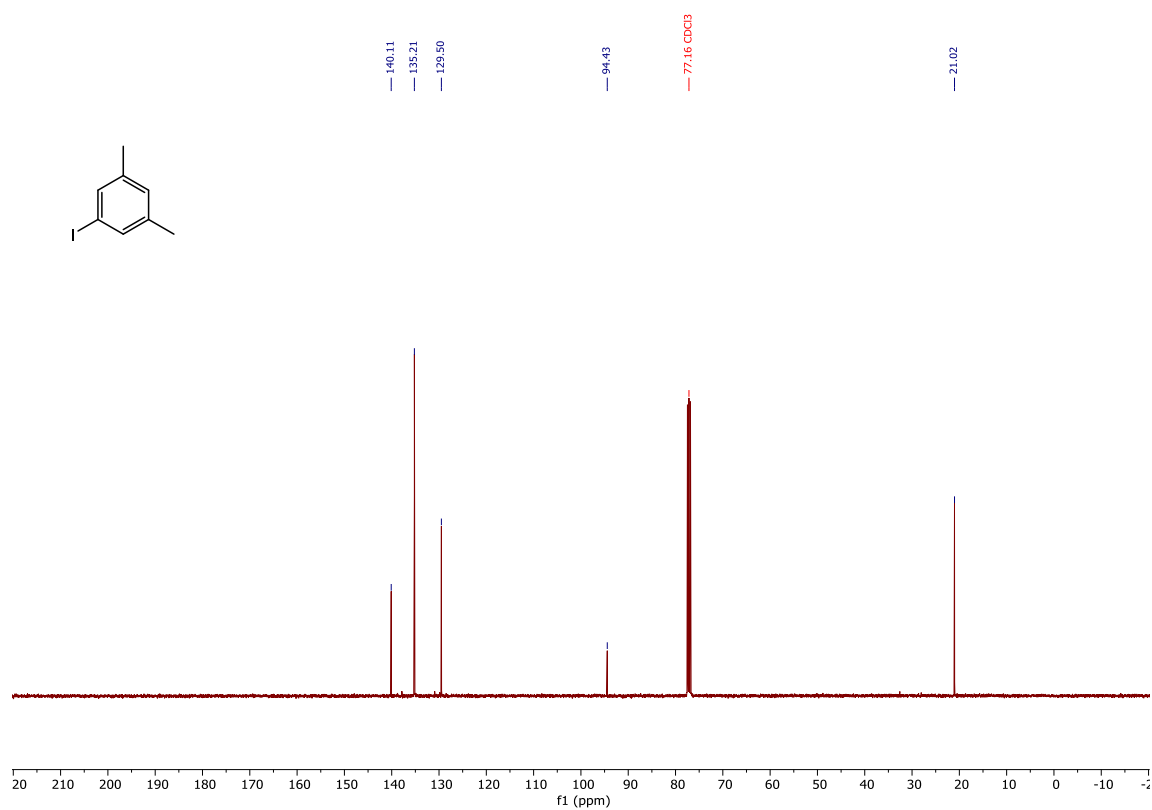

**1-iodo-3,5-dimethylbenzene (3I')**



Following the general procedure B, using 1-iodo-2-nitrobenzene (**2**) (2.250 g, 9.000 mmol, 3.0 equiv.), *meta*-xylene (**11**) (318.6 mg, 3.000 mmol), and purification via silica column chromatography using pentane as the eluent, the target compound **3I'** was obtained as a colorless liquid (480 mg, 69%). The assignment of the compound was achieved by comparison with the literature.<sup>3</sup>

**<sup>1</sup>H NMR (CDCl<sub>3</sub>, 400 MHz):**  $\delta$  = 7.35 (s, 2H), 6.93 (s, 1H), 2.26 (s, 6H) ppm.

**<sup>13</sup>C NMR (CDCl<sub>3</sub>, 100 MHz):**  $\delta$  = 139.9, 135.1, 129.4, 94.5, 21.0 ppm.

**$^1\text{H}$  NMR spectrum in  $\text{CDCl}_3$ :**

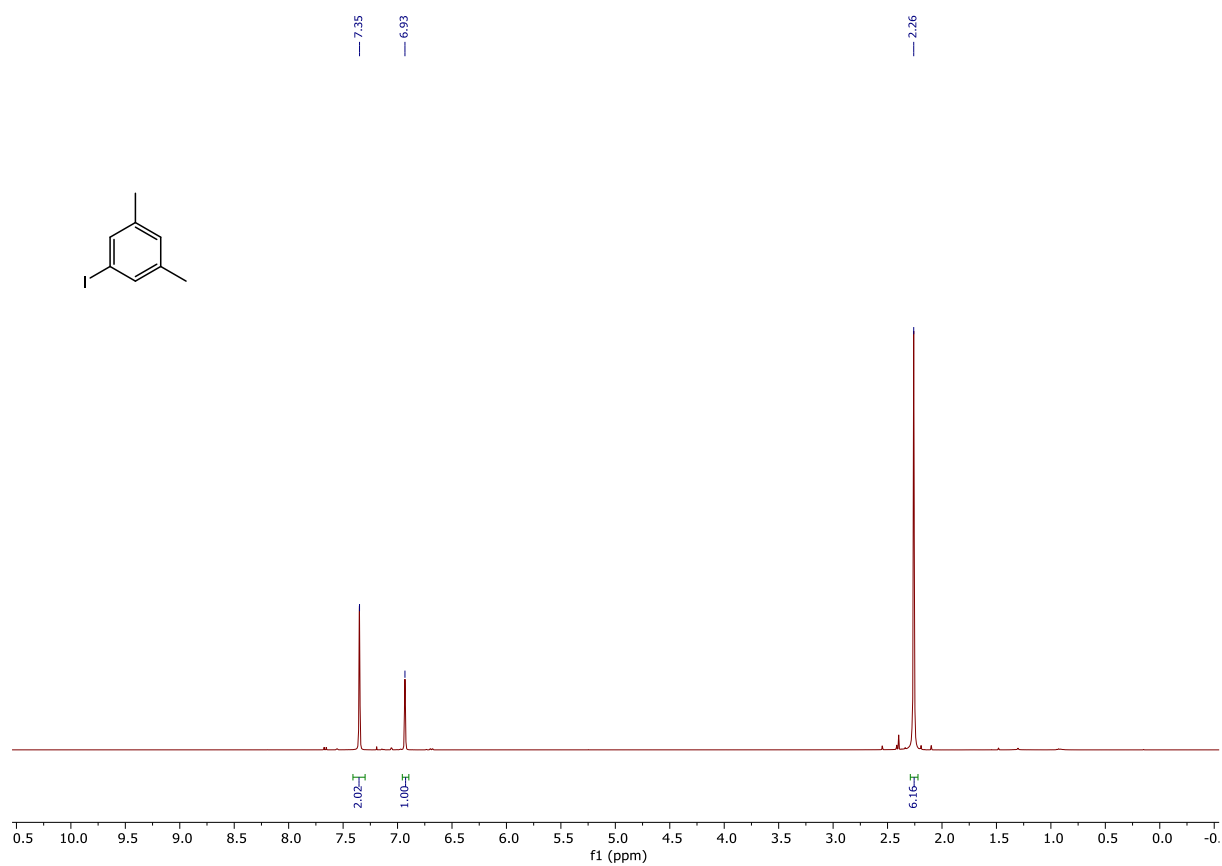

**$^{13}\text{C}$  NMR spectrum in  $\text{CDCl}_3$ :**

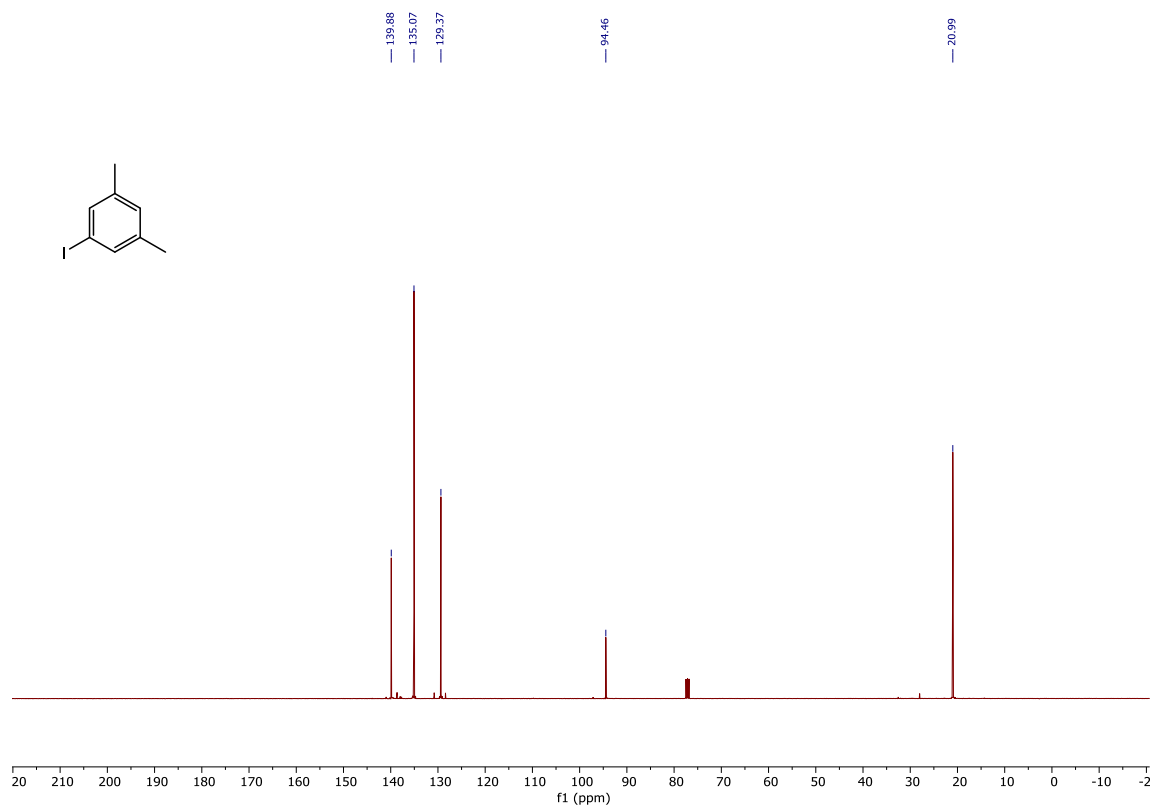

**1-fluoro-3-iodo-5-methylbenzene (3m)**

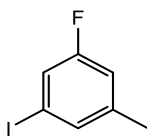

Following the general procedure B, using 1-iodo-2-nitrobenzene (**2**) (150 mg, 0.600 mmol, 3.0 equiv.), 1-fluoro-3-methylbenzene (**1m**) (22.0 mg, 0.200 mmol), and purification via silica column chromatography using pentane as the eluent, the target compound **3m** was obtained as a colorless liquid (23.3 mg, 49%).

**<sup>1</sup>H NMR (CDCl<sub>3</sub>, 400 MHz):**  $\delta$  = 7.33 (s, 1H), 7.24 (d,  $J$  = 8.0 Hz, 1H), 6.85 (d,  $J$  = 9.6 Hz, 1H), 2.31 (s, 3H) ppm.

**<sup>13</sup>C NMR (CDCl<sub>3</sub>, 100 MHz):**  $\delta$  = 162.4 (d,  $J$  = 250.8 Hz), 142.2 (d,  $J$  = 7.8 Hz), 134.2 (d,  $J$  = 2.9 Hz), 122.0 (d,  $J$  = 23.7 Hz), 115.9 (d,  $J$  = 20.8 Hz), 93.4 (d,  $J$  = 8.7 Hz), 21.0 (d,  $J$  = 1.8 Hz) ppm.

**<sup>19</sup>F NMR (CDCl<sub>3</sub>, 375 MHz):**  $\delta$  = -112.0 ppm.

**HRMS (EI pos) m/z:** Calcd for C<sub>7</sub>H<sub>6</sub>FI<sup>+</sup> 235,9498, Found 235,9495.

**$^1\text{H}$  NMR spectrum in  $\text{CDCl}_3$ :**

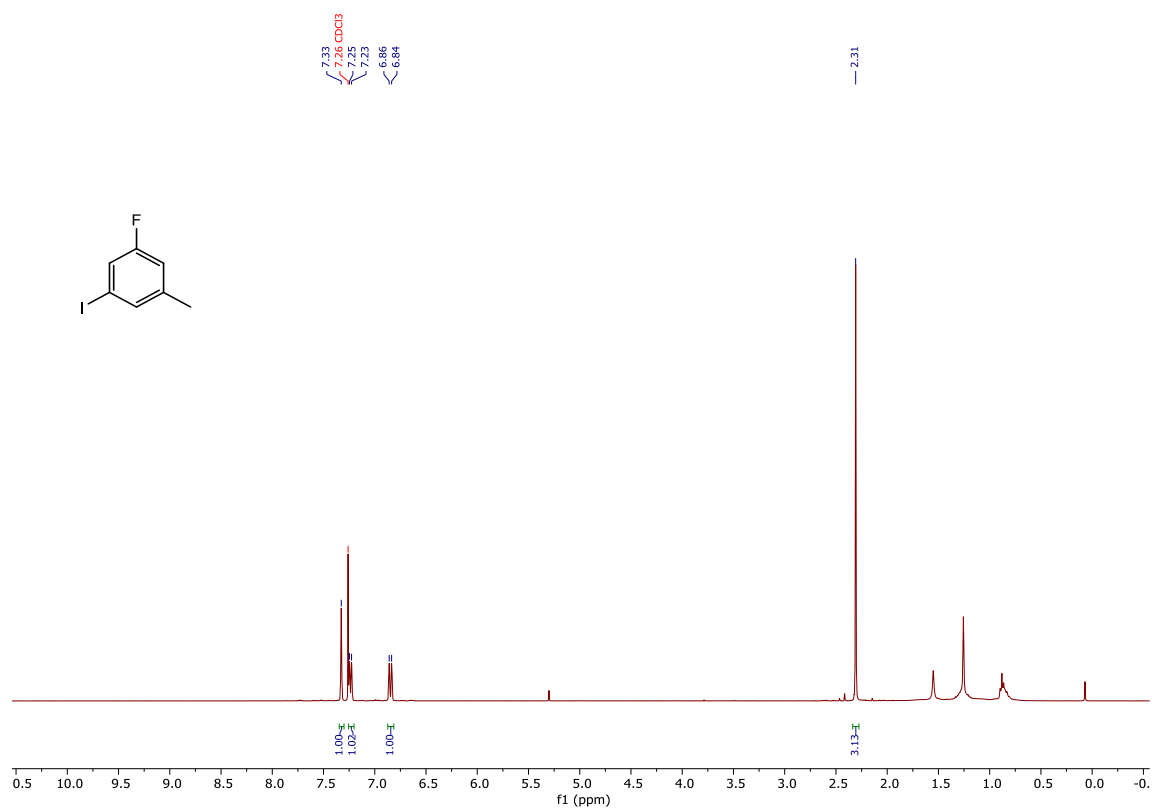

**$^{13}\text{C}$  NMR spectrum in  $\text{CDCl}_3$ :**

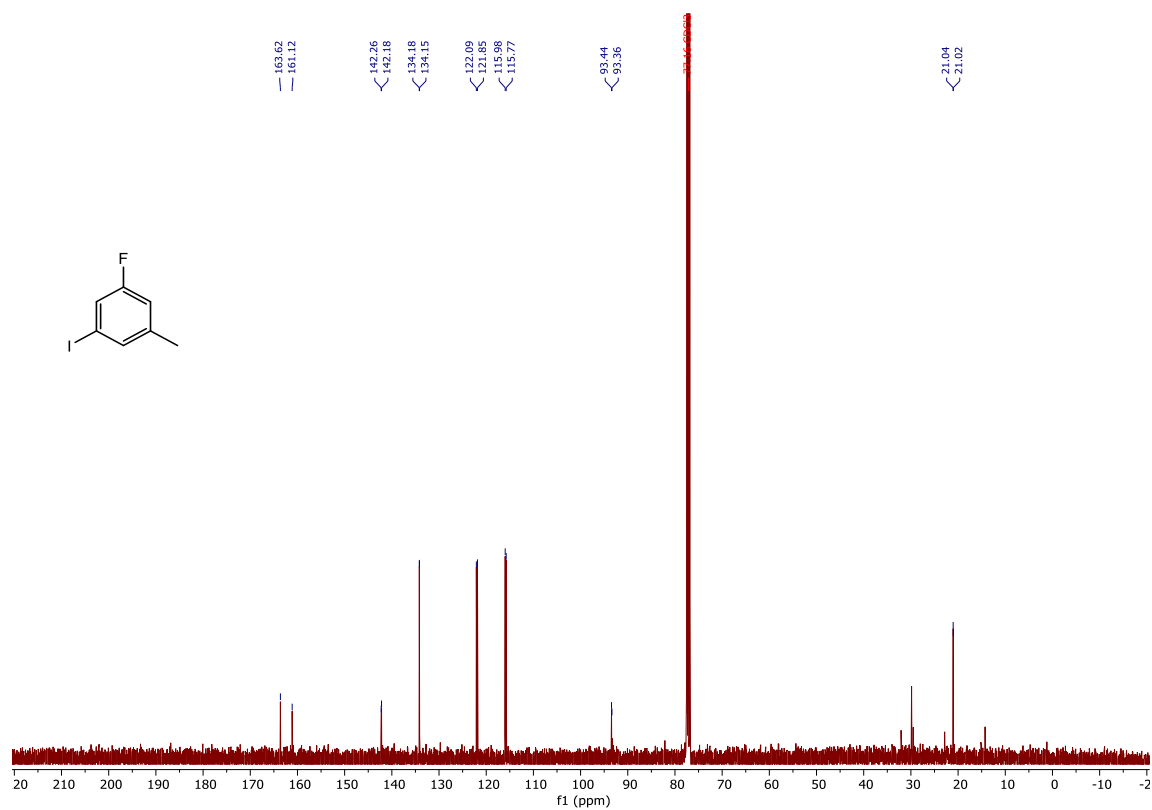

**$^{19}\text{F}$  NMR spectrum in  $\text{CDCl}_3$ :**

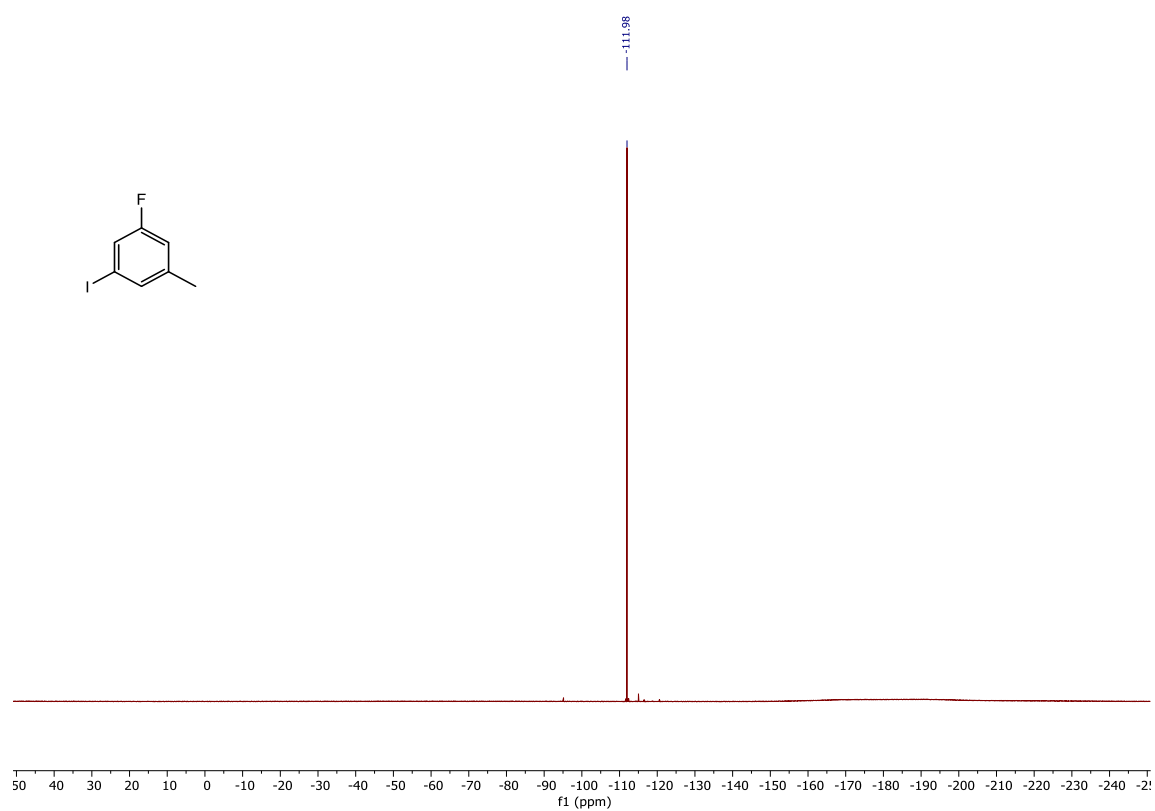

**1-chloro-3-iodo-5-methylbenzene (3n)**

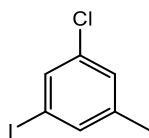

Following the general procedure B, using 1-iodo-2-nitrobenzene (**2**) (150 mg, 0.600 mmol, 3.0 equiv.), 1-chloro-3-methylbenzene (**1n**) (25.3 mg, 0.200 mmol), and purification via silica column chromatography using pentane as the eluent, the target compound **3n** was obtained as a colorless liquid (27.8 mg, 55%). The assignment of the compound was achieved by comparison with the literature.<sup>10</sup>

**<sup>1</sup>H NMR (CDCl<sub>3</sub>, 400 MHz):**  $\delta$  = 7.51 (s, 1H), 7.43 (s, 1H), 7.13 (s, 1H), 2.29 (s, 3H) ppm.

**<sup>13</sup>C NMR (CDCl<sub>3</sub>, 100 MHz):**  $\delta$  = 141.7, 136.5, 134.8, 134.2, 128.9, 94.0, 20.9 ppm.

**$^1\text{H}$  NMR spectrum in  $\text{CDCl}_3$ :**

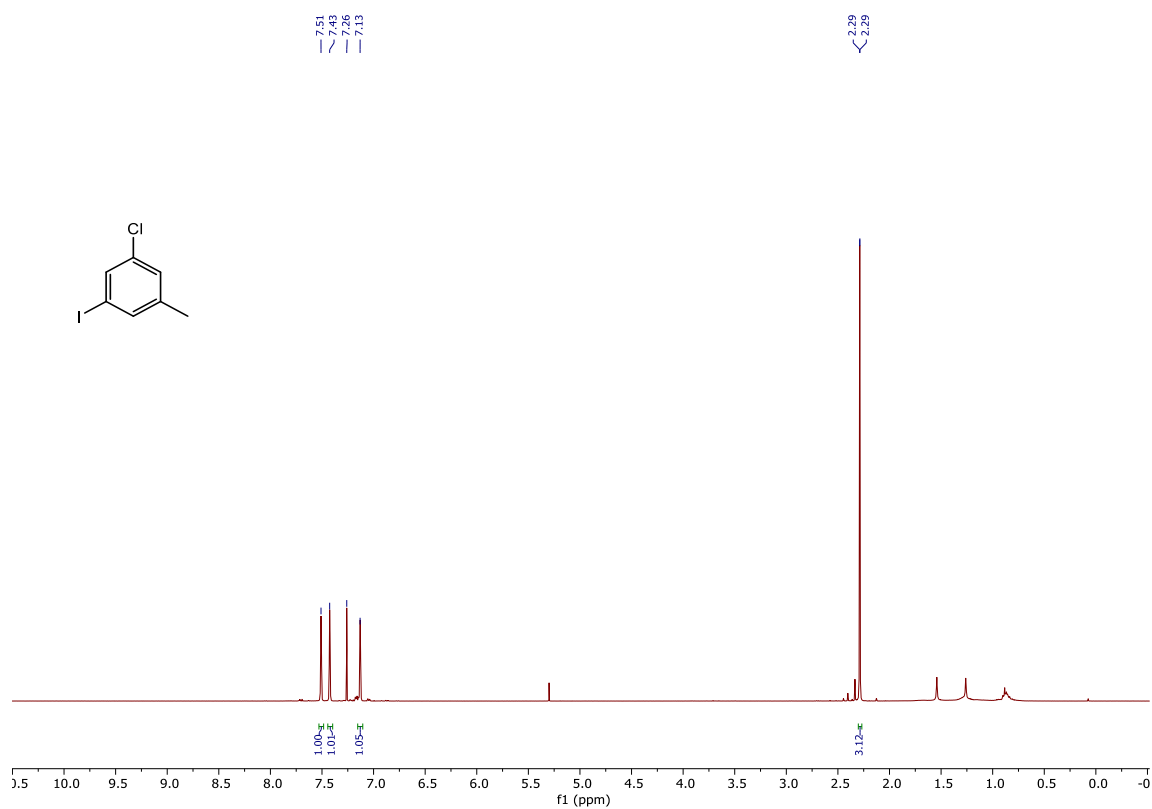

**$^{13}\text{C}$  NMR spectrum in  $\text{CDCl}_3$ :**

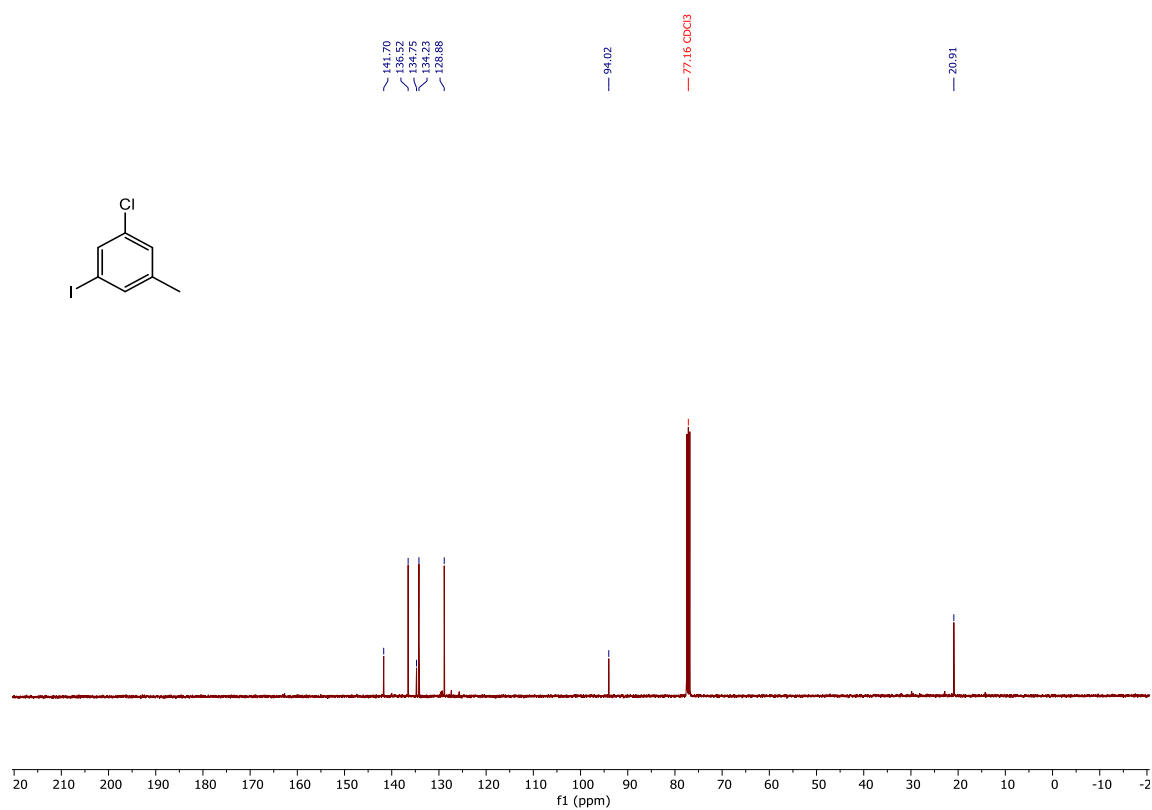



**1-bromo-3-iodo-5-methylbenzene (3o)**

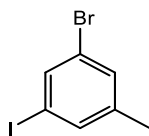

Following the general procedure B, using 1-iodo-2-nitrobenzene (**2**) (150 mg, 0.600 mmol, 3.0 equiv.), 1-bromo-3-methylbenzene (**1o**) (34.2 mg, 0.200 mmol), and purification via silica column chromatography using pentane as the eluent, the target compound **3o** was obtained as a colorless liquid (36.8 mg, 62%).

**<sup>1</sup>H NMR (CDCl<sub>3</sub>, 400 MHz):**  $\delta$  = 7.66 (s, 1H), 7.47 (s, 1H), 7.29 (s, 1H), 2.28 (s, 3H) ppm.

**<sup>13</sup>C NMR (CDCl<sub>3</sub>, 100 MHz):**  $\delta$  = 142.1, 137.0, 136.8, 131.7, 122.8, 94.4, 20.9 ppm.

**HRMS (EI pos) m/z:** Calcd for C<sub>7</sub>H<sub>6</sub>BrI<sup>+</sup> 295.8692, Found 295.8691.

**IR (cm<sup>-1</sup>):** 1579, 1546, 1424, 842, 724, 667, 559.

**$^1\text{H}$  NMR spectrum in  $\text{CDCl}_3$ :**

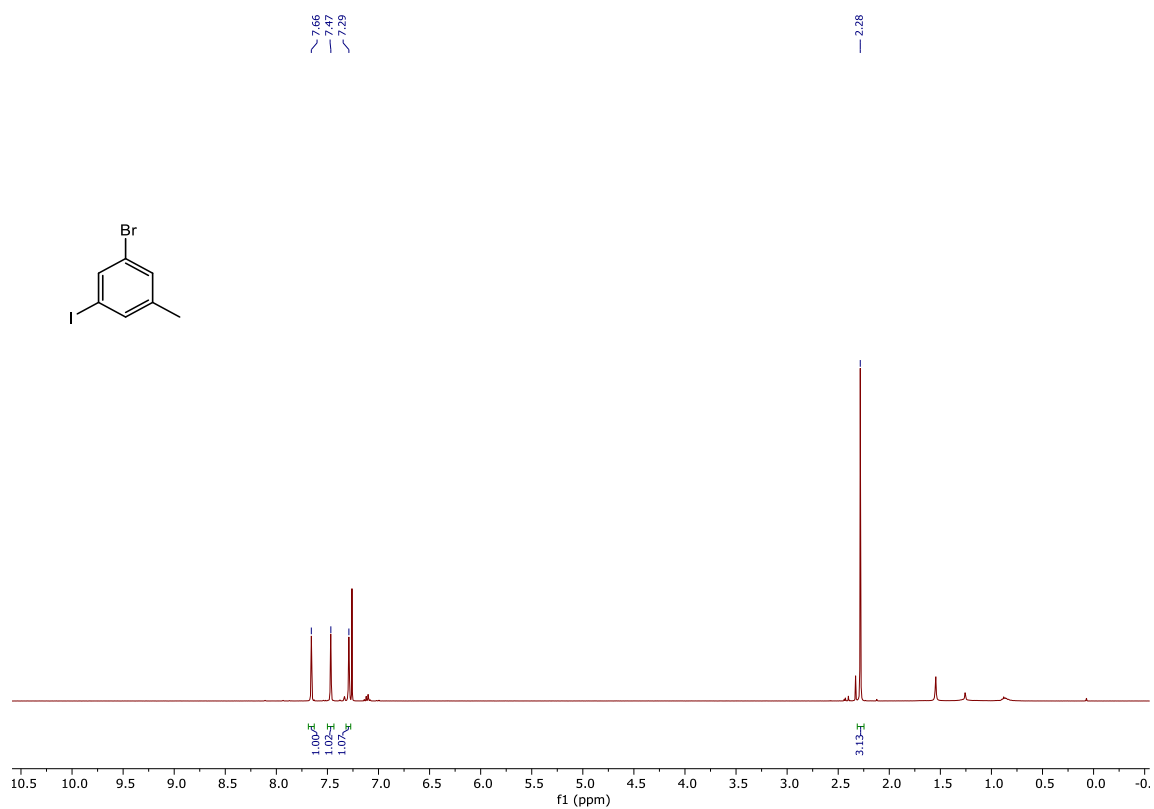

**$^{13}\text{C}$  NMR spectrum in  $\text{CDCl}_3$ :**

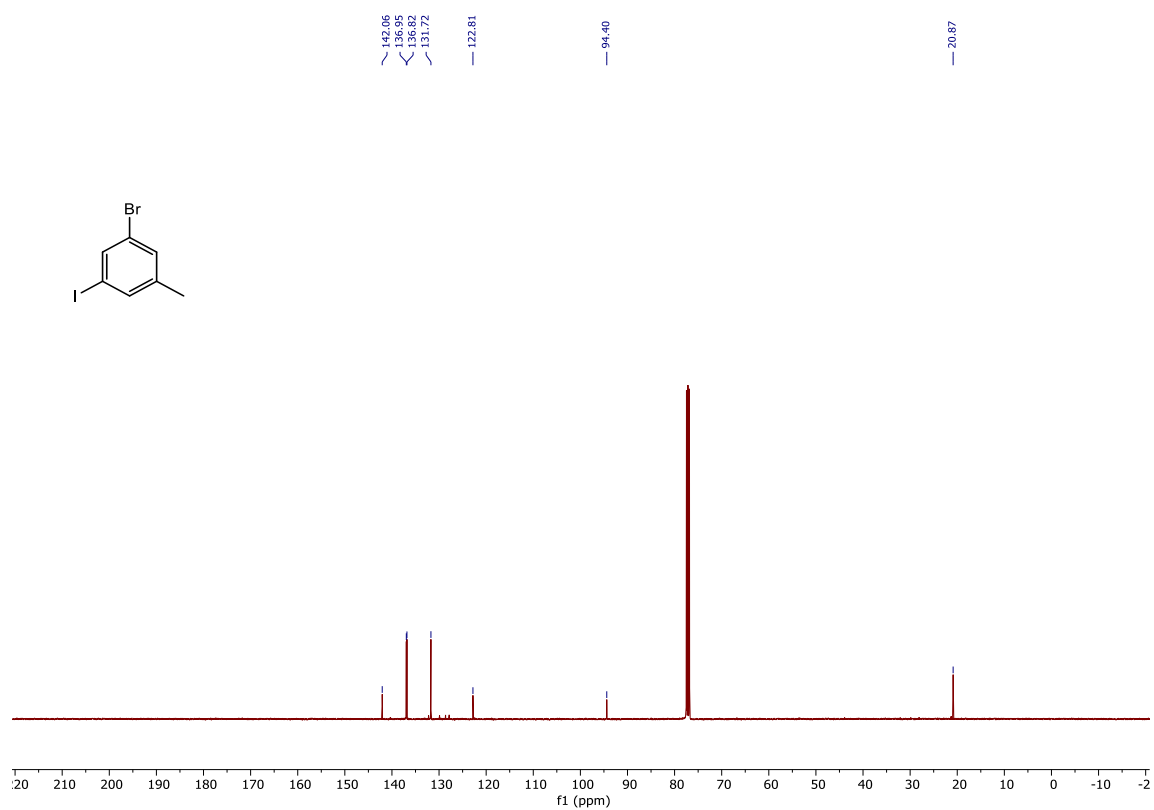

**1-bromo-3-chloro-5-iodobenzene (3p)**

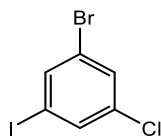

Following the general procedure B, using 1-iodo-2-nitrobenzene (**2**) (150 mg, 0.600 mmol, 3.0 equiv.), 1-bromo-3-chlorobenzene (**1p**) (38.3 mg, 0.200 mmol), and purification via silica column chromatography using pentane as the eluent, the target compound **3p** was obtained as a colorless liquid (13.3 mg, 21%). The assignment of the compound was achieved by comparison with the literature.<sup>3</sup>

**<sup>1</sup>H NMR (CDCl<sub>3</sub>, 400 MHz):**  $\delta$  = 7.76 (t,  $J$  = 1.6 Hz, 1H), 7.66-7.64 (m, 1H), 7.49 (t,  $J$  = 1.8 Hz, 1H) ppm.

**<sup>13</sup>C NMR (CDCl<sub>3</sub>, 100 MHz):**  $\delta$  = 138.3, 136.1, 135.8, 131.2, 123.3, 94.2 ppm.

**<sup>1</sup>H NMR spectrum in CDCl<sub>3</sub>:**

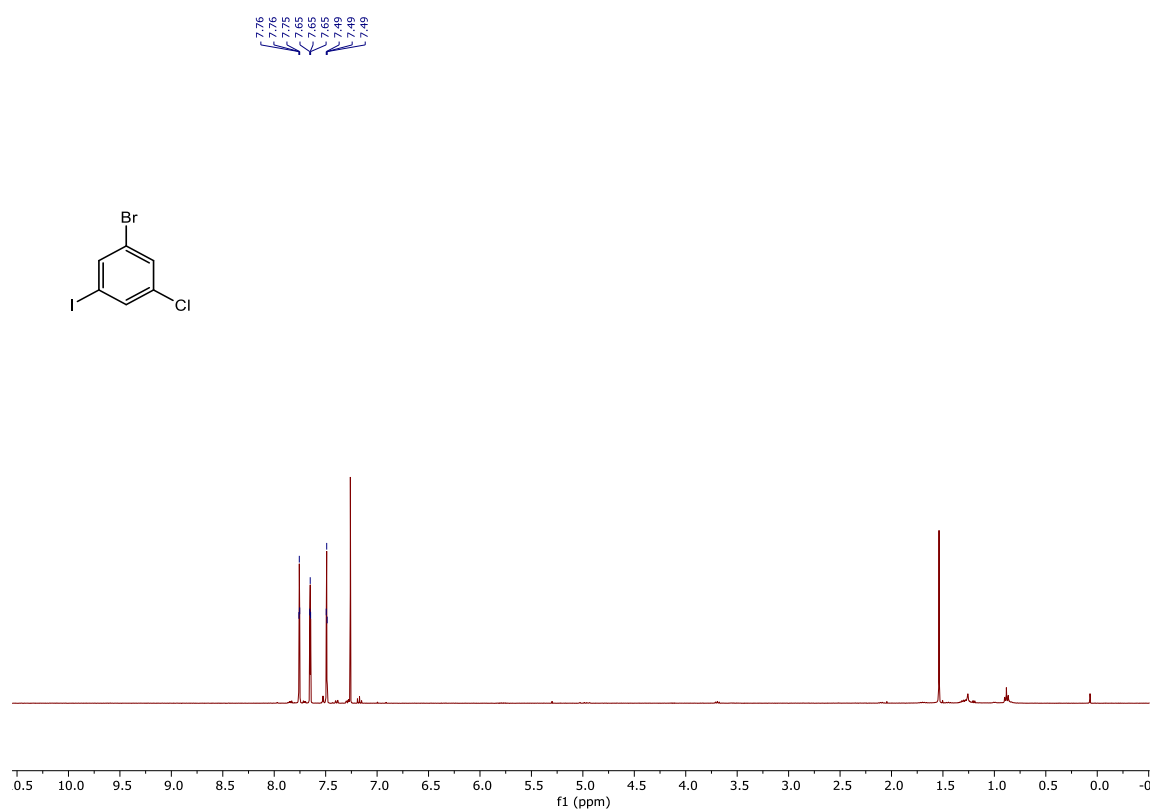

**$^{13}\text{C}$  NMR spectrum in  $\text{CDCl}_3$ :**

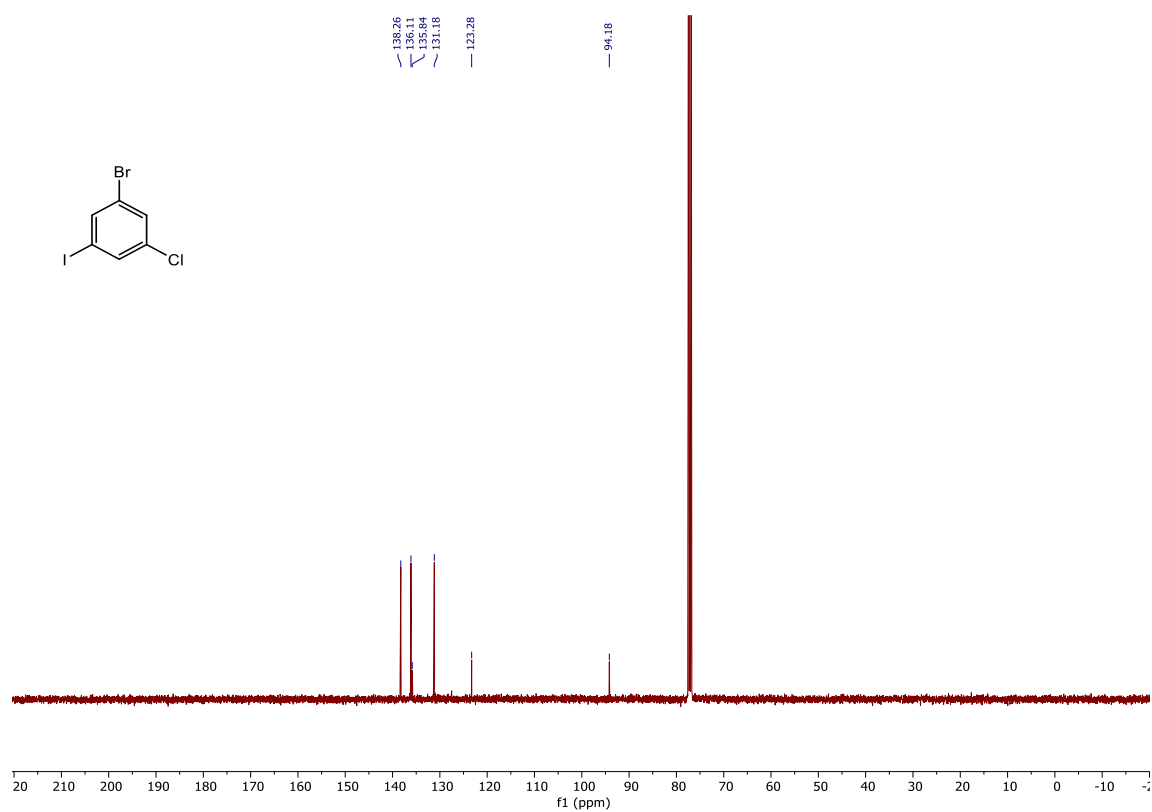

**2-(2-iodo-5-methylphenyl)isoindoline-1,3-dione (3q- $\alpha$ ) and 2-(3-iodo-5-methylphenyl)isoindoline-1,3-dione (3q- $\beta$ )**

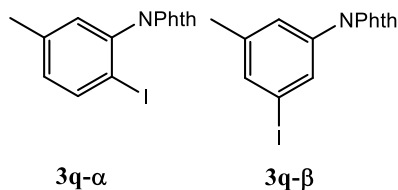

Following the general procedure B, using 1-iodo-2-nitrobenzene (**2**) (150 mg, 0.600 mmol, 3.0 equiv.), 2-(*m*-tolyl)isoindoline-1,3-dione (**1q**) (47.5 mg, 0.200 mmol), and purification via silica column chromatography using pentane:CH<sub>2</sub>Cl<sub>2</sub> = 1:1 as the eluent, the target compound **3q** was obtained as a colorless solid (26.1 mg, 36%,  $\alpha$ : $\beta$  = 22:78).

**<sup>1</sup>H NMR (CDCl<sub>3</sub>, 400 MHz):**  $\delta$  = 8.00-7.92 (m, 2H <sup>$\alpha$</sup> +2H <sup>$\beta$</sup> ), 7.85-7.77 (m, 3H <sup>$\alpha$</sup> +2H <sup>$\beta$</sup> ), 7.61-7.58 (m, 2H <sup>$\beta$</sup> ), 7.23 (s, 1H <sup>$\beta$</sup> ), 7.13 (d,  $J$  = 2.1 Hz, 1H <sup>$\alpha$</sup> ), 7.02 (dd,  $J$  = 8.2, 2.1 Hz, 1H <sup>$\alpha$</sup> ), 2.38 (s, 3H <sup>$\beta$</sup> ), 2.37 (s, 3H <sup>$\alpha$</sup> ) ppm.

**<sup>13</sup>C NMR (CDCl<sub>3</sub>, 100 MHz):**  $\delta$  = 167.1, 166.8, 141.1, 140.0, 139.6, 138.1, 135.0, 134.7, 134.6, 132.6(2), 132.6, 132.2, 132.1, 131.8, 131.1, 126.9, 124.1, 124.0, 94.8, 93.7, 21.1, 21.0 ppm.

**HRMS (ESI pos) m/z:** Calcd for C<sub>15</sub>H<sub>10</sub>NO<sub>2</sub>INa<sup>+</sup> 385.9648, Found 385.9646.

# <sup>1</sup>H NMR spectrum in CDCl<sub>3</sub>:

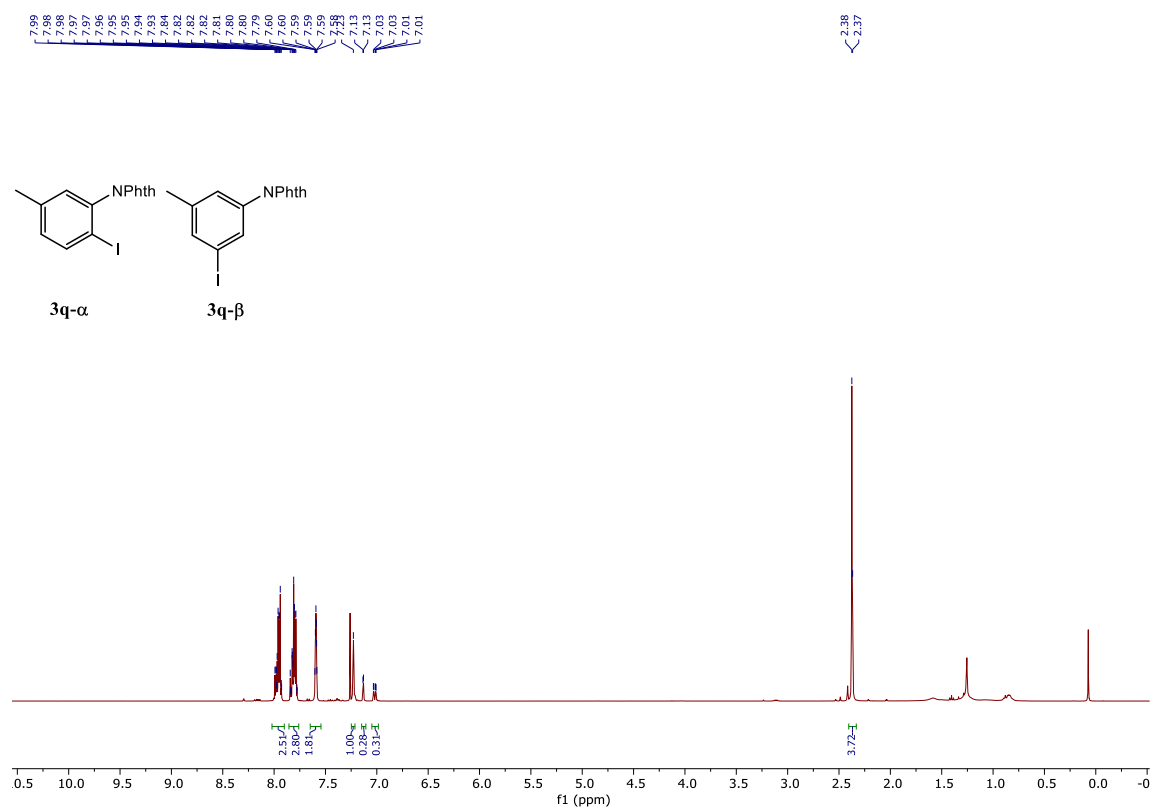

# <sup>13</sup>C NMR spectrum in CDCl<sub>3</sub>:

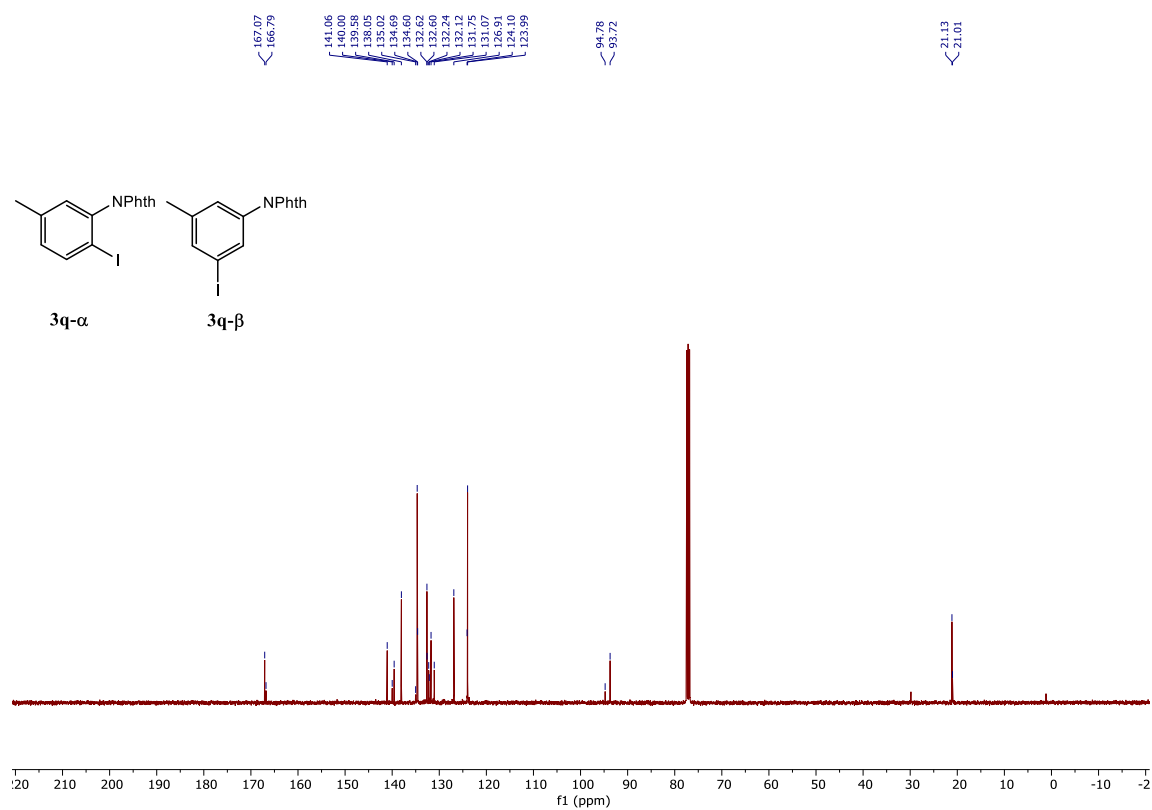

**1-iodo-2-(2-methoxyethyl)-4-methylbenzene (3r- $\alpha$ ) and 1-iodo-3-(2-methoxyethyl)-5-methylbenzene (3r- $\beta$ )**

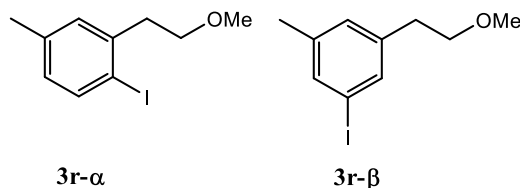

Following the general procedure B, using 1-iodo-2-nitrobenzene (**2**) (150 mg, 0.600 mmol, 3.0 equiv.), 1-(2-methoxyethyl)-3-methylbenzene (**1r**) (30.0 mg, 0.200 mmol), and purification via silica column chromatography using pentane:CH<sub>2</sub>Cl<sub>2</sub> = 1:1 as the eluent, the target compound **3r** was obtained as a colorless liquid (40.0 mg, 73%,  $\alpha$ : $\beta$  = 20:80).

**<sup>1</sup>H NMR (CDCl<sub>3</sub>, 400 MHz):**  $\delta$  = 7.67 (d,  $J$  = 8.0 Hz, 1H <sup>$\alpha$</sup> ), 7.39 (s, 1H <sup>$\beta$</sup> ), 7.38 (s, 1H <sup>$\beta$</sup> ), 7.08 (d,  $J$  = 1.8 Hz, 1H <sup>$\alpha$</sup> ), 6.99 (s, 1H <sup>$\beta$</sup> ), 6.73 (dd,  $J$  = 8.0, 1.8 Hz, 1H <sup>$\alpha$</sup> ), 3.60-3.54 (m, 2H <sup>$\alpha$</sup> +2H <sup>$\beta$</sup> ), 3.38 (s, 3H <sup>$\alpha$</sup> ), 3.35 (s, 3H <sup>$\beta$</sup> ), 2.98 (t,  $J$  = 7.2 Hz, 2H <sup>$\alpha$</sup> ), 2.78 (t,  $J$  = 6.9 Hz, 2H <sup>$\beta$</sup> ), 2.28-2.27 (m, 3H <sup>$\alpha$</sup> +3H <sup>$\beta$</sup> ) ppm.

**<sup>13</sup>C NMR (CDCl<sub>3</sub>, 100 MHz):**  $\delta$  = 141.3, 141.2, 140.3, 139.3, 138.4, 136.1, 134.9, 131.2, 129.3(2), 129.2(8), 96.7, 94.5, 73.3, 72.2, 58.8(4), 58.8(2), 40.8, 35.8, 21.1, 21.0 ppm.

**HRMS (ESI pos) m/z:** Calcd for C<sub>10</sub>H<sub>13</sub>OINa<sup>+</sup> 298.9903, Found 298.9905.

# <sup>1</sup>H NMR spectrum in CDCl<sub>3</sub>:

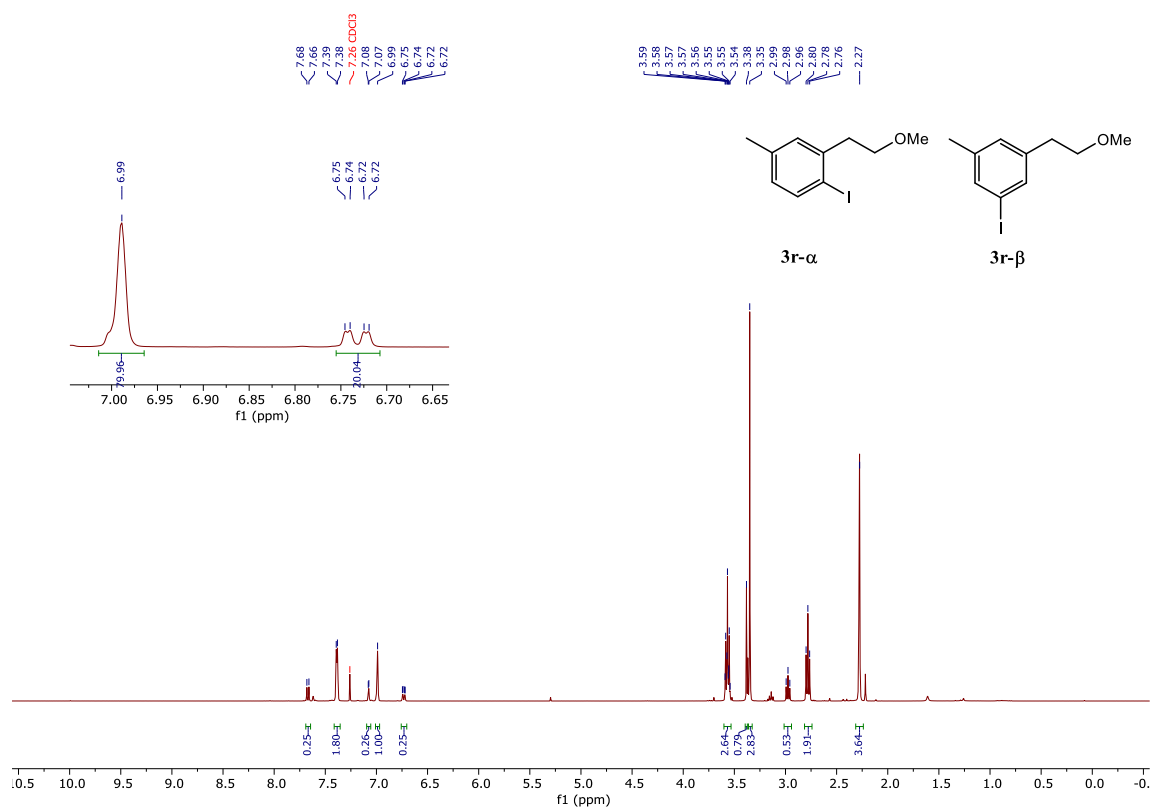

# <sup>13</sup>C NMR spectrum in CDCl<sub>3</sub>:

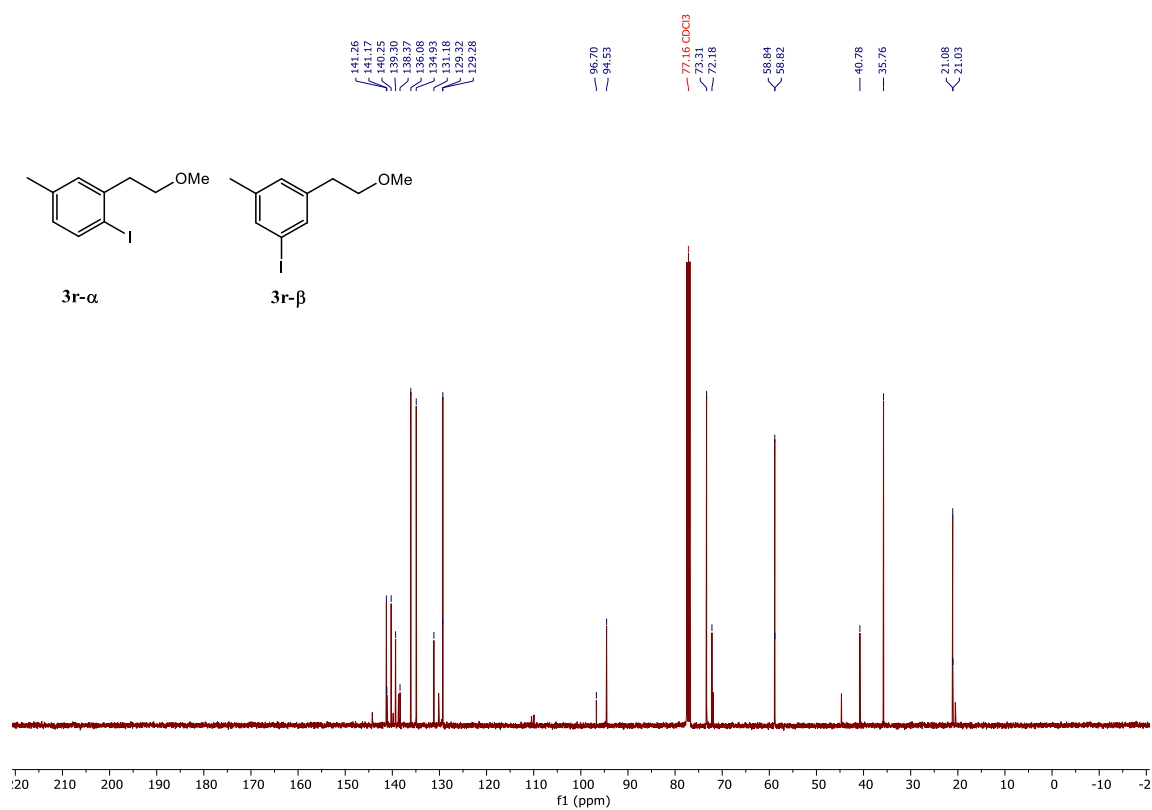



**2-iodo-5-methylbenzyl acetate (3s- $\alpha$ ) and 3-iodo-5-methylbenzyl acetate (3s- $\beta$ )**

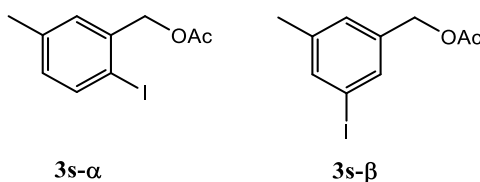

Following the general procedure B, using 1-iodo-2-nitrobenzene (**2**) (150 mg, 0.600 mmol, 3.0 equiv.), 3-methylbenzyl acetate (**1s**) (32.8 mg, 0.200 mmol), and purification via silica column chromatography using pentane:CH<sub>2</sub>Cl<sub>2</sub> = 1:1 as the eluent, the target compound **3s** was obtained as a colorless liquid (38.9 mg, 67%,  $\alpha$ : $\beta$  = 8:92).

**<sup>1</sup>H NMR (CDCl<sub>3</sub>, 400 MHz):**  $\delta$  = 7.71 (d,  $J$  = 8.0 Hz, 1H <sup>$\alpha$</sup> ), 7.50 (s, 2H <sup>$\beta$</sup> ), 7.19 (s, 1H <sup>$\alpha$</sup> ), 7.11 (s, 1H <sup>$\beta$</sup> ), 6.85 (d,  $J$  = 8.0 Hz, 1H <sup>$\alpha$</sup> ), 5.09 (s, 2H <sup>$\alpha$</sup> ), 5.00 (s, 2H <sup>$\beta$</sup> ), 2.33-2.28 (m, 3H <sup>$\alpha$</sup> +3H <sup>$\beta$</sup> ), 2.14 (s, 3H <sup>$\alpha$</sup> ), 2.11 (s, 3H <sup>$\beta$</sup> ) ppm.

**<sup>13</sup>C NMR (CDCl<sub>3</sub>, 100 MHz):**  $\delta$  = 170.9, 170.8, 140.6, 139.4, 138.6, 138.0(3), 138.0(1), 134.2, 131.0, 130.7, 128.4, 94.5, 94.4, 70.2, 65.4, 21.1(2), 21.0(8), 21.0(6) ppm.

**HRMS (ESI pos) m/z:** Calcd for C<sub>10</sub>H<sub>11</sub>O<sub>2</sub>INa<sup>+</sup> 312.9696, Found 312.9696.

**IR (cm<sup>-1</sup>):** 1734, 1374, 1359, 1220, 1028, 848, 797, 561.

# <sup>1</sup>H NMR spectrum in CDCl<sub>3</sub>:

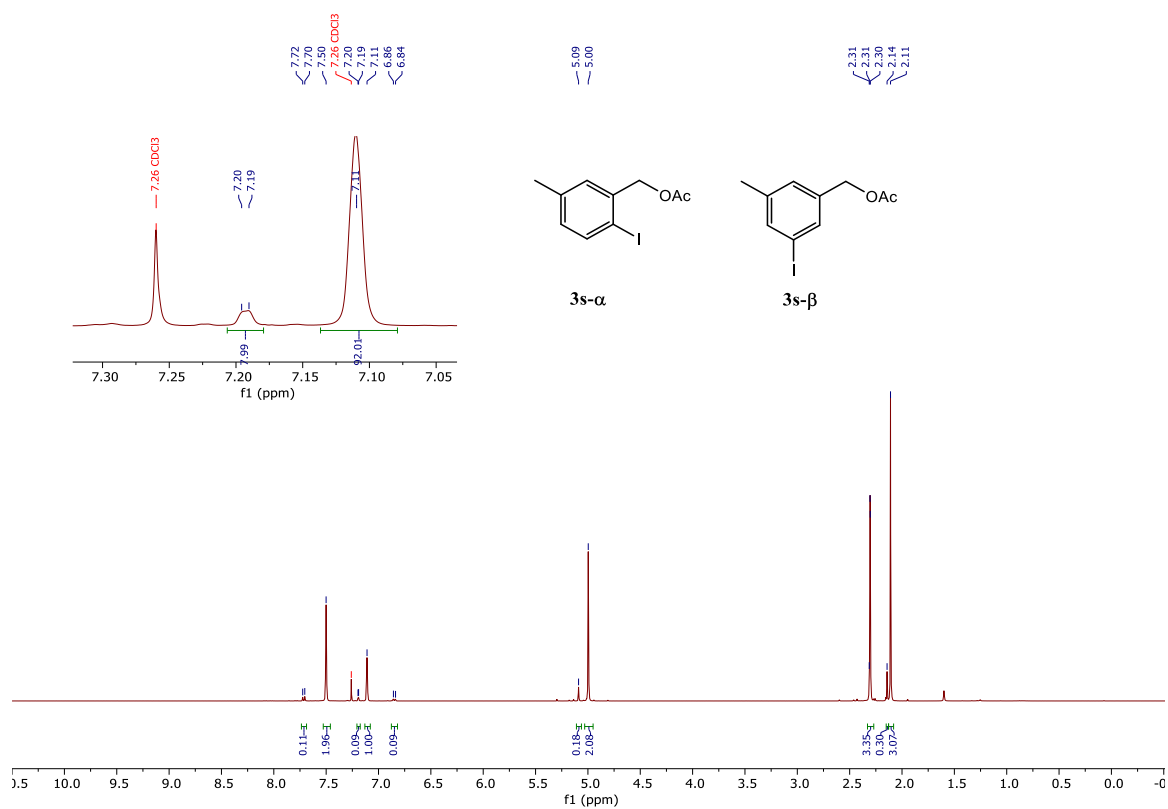

# <sup>13</sup>C NMR spectrum in CDCl<sub>3</sub>:

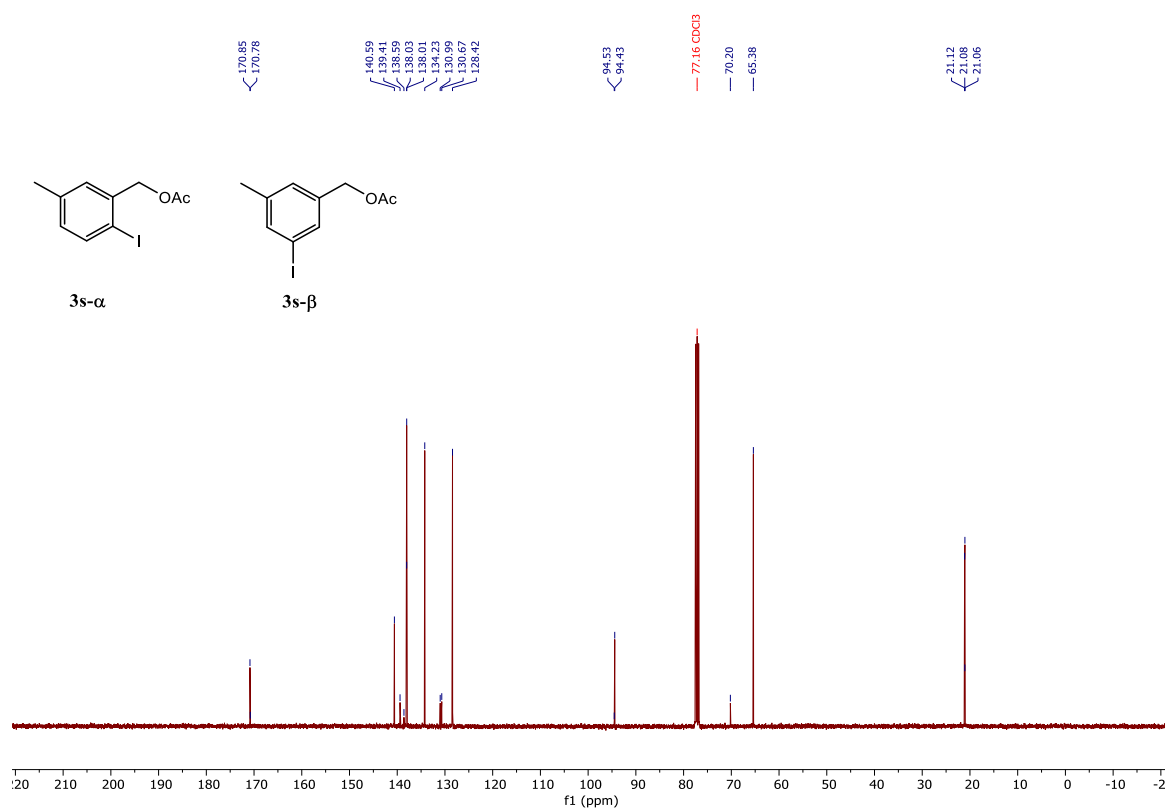

**2-(3-iodo-5-methylphenethyl)isoindoline-1,3-dione (3t)**

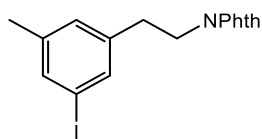

Following the general procedure B, using 1-iodo-2-nitrobenzene (**2**) (150 mg, 0.600 mmol, 3.0 equiv.), 2-(3-methylphenethyl)isoindoline-1,3-dione (**1t**) (53.1 mg, 0.200 mmol), and purification via silica column chromatography using pentane:CH<sub>2</sub>Cl<sub>2</sub> = 1:4 as the eluent, the target compound **3t** was obtained as a colorless liquid (54.0 mg, 69%).

**<sup>1</sup>H NMR (CDCl<sub>3</sub>, 400 MHz):**  $\delta$  = 7.86-7.80 (m, 2H), 7.74-7.69 (m, 2H), 7.39 (s, 2H), 7.03 (s, 1H), 3.90-3.82 (m, 2H), 2.91-2.82 (m, 2H), 2.25 (s, 3H) ppm.

**<sup>13</sup>C NMR (CDCl<sub>3</sub>, 100 MHz):**  $\delta$  = 168.2, 140.5, 140.2, 136.5, 135.0, 134.1, 132.2, 129.2, 123.4, 94.6, 39.1, 34.2, 21.0 ppm.

**HRMS (ESI pos) m/z:** Calcd for C<sub>17</sub>H<sub>14</sub>NO<sub>2</sub>INa<sup>+</sup> 413.9961, Found 413.9956.

**IR (cm<sup>-1</sup>):** 1771, 1704, 1433, 1395, 1359, 1087, 1009, 993, 869, 851, 714, 692.

**$^1\text{H}$  NMR spectrum in  $\text{CDCl}_3$ :**

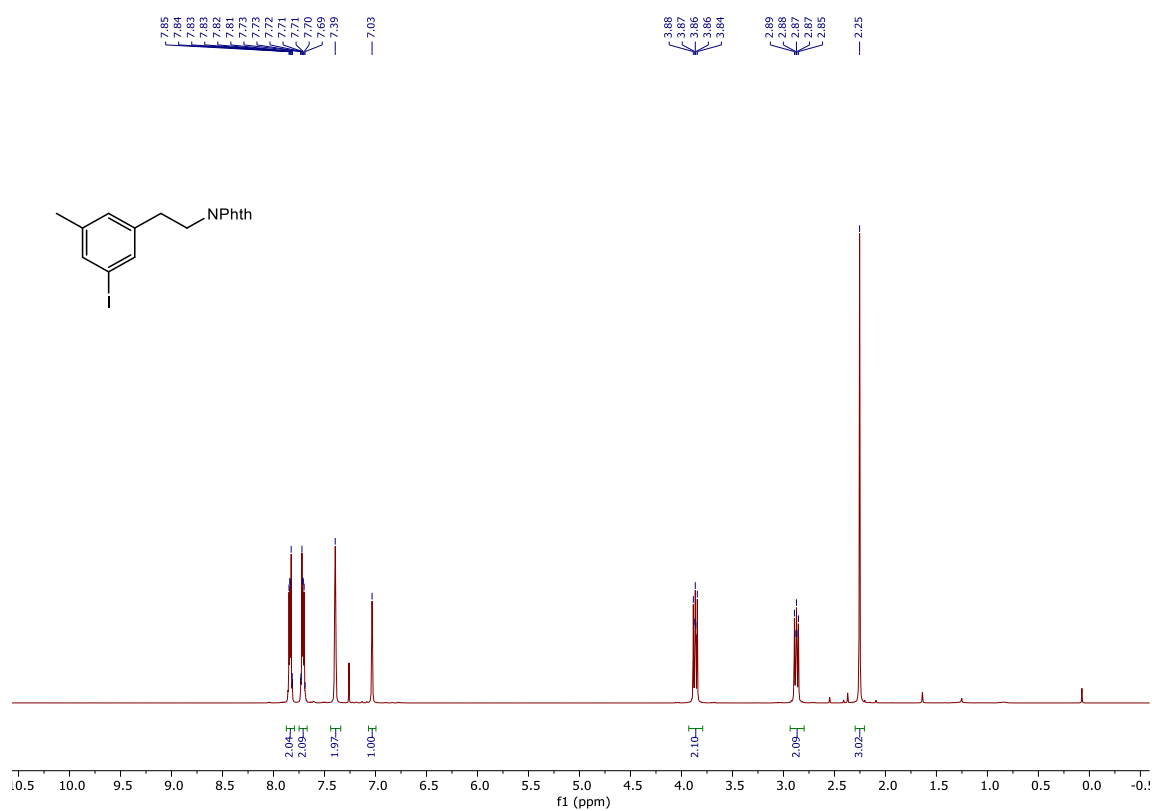

**$^{13}\text{C}$  NMR spectrum in  $\text{CDCl}_3$ :**

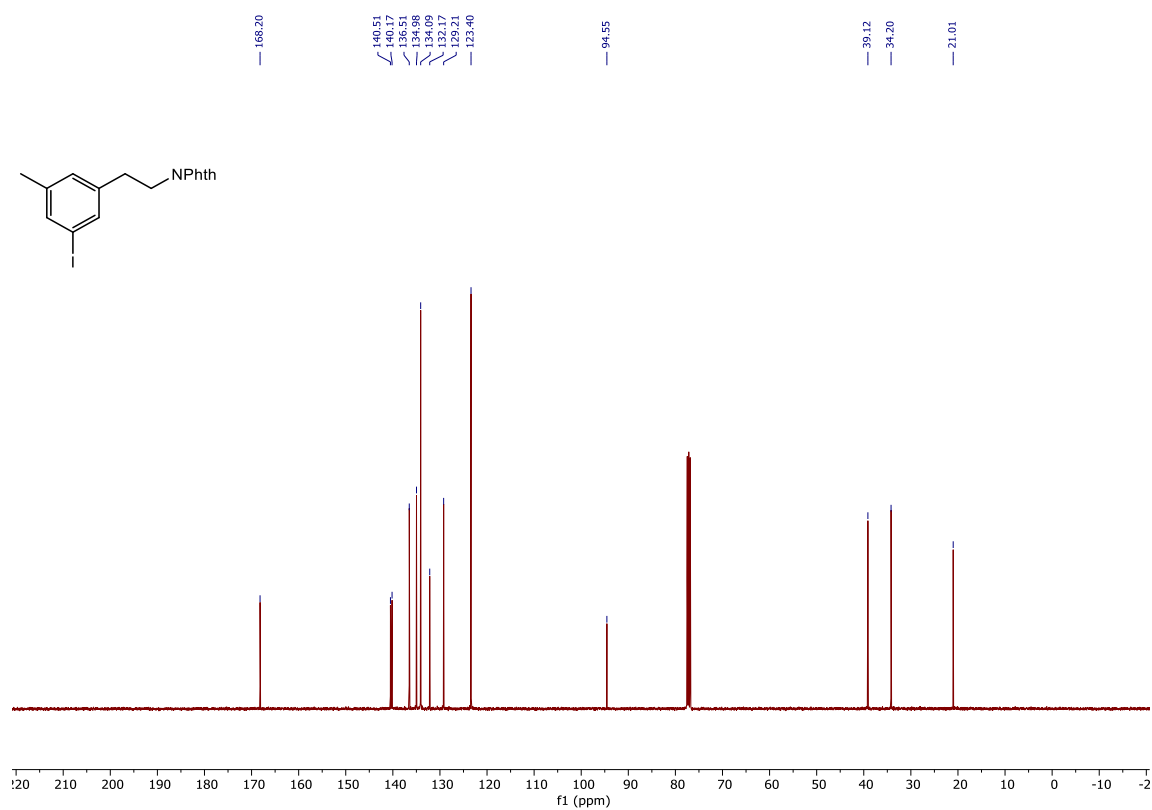

***N*-(3-iodo-5-methylphenethyl)dodecanamide (3u)**

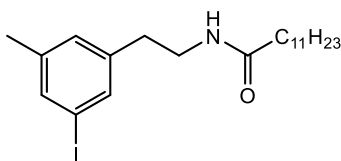

Following the general procedure B, using 1-iodo-2-nitrobenzene (**2**) (150 mg, 0.600 mmol, 3.0 equiv.), *N*-(3-methylphenethyl)dodecanamide (**1u**) (63.5 mg, 0.200 mmol), and purification via silica column chromatography using pentane:EtOAc = 3:1 as the eluent, the target compound **3u** was obtained as a colorless solid (50.0 mg, 56%).

**<sup>1</sup>H NMR (CDCl<sub>3</sub>, 400 MHz):**  $\delta$  = 7.41 (s, 1H), 7.34 (s, 1H), 6.95 (s, 1H), 5.48 (s, NH), 3.46 (q,  $J$  = 6.9 Hz, 2H), 2.71 (t,  $J$  = 6.9 Hz, 2H), 2.27 (s, 3H), 2.15-2.09 (m, 2H), 1.64-1.52 (m, 2H), 1.31-1.19 (m, 16H), 0.90-0.84 (m, 3H) ppm.

**<sup>13</sup>C NMR (CDCl<sub>3</sub>, 100 MHz):**  $\delta$  = 173.3, 141.3, 140.6, 136.3, 134.9, 129.2, 94.7, 40.5, 37.0, 35.3, 32.0, 29.8, 29.7, 29.6, 29.5(1), 29.4(6), 29.4, 25.9, 22.8, 21.1, 14.2 ppm.

**HRMS (ESI pos) m/z:** Calcd for C<sub>21</sub>H<sub>34</sub>NOINa<sup>+</sup> 466.1577, Found 466.1569.

**IR (cm<sup>-1</sup>):** 3291, 2917, 2850, 1635, 1559, 847, 799, 691, 566.

**$^1\text{H}$  NMR spectrum in  $\text{CDCl}_3$ :**

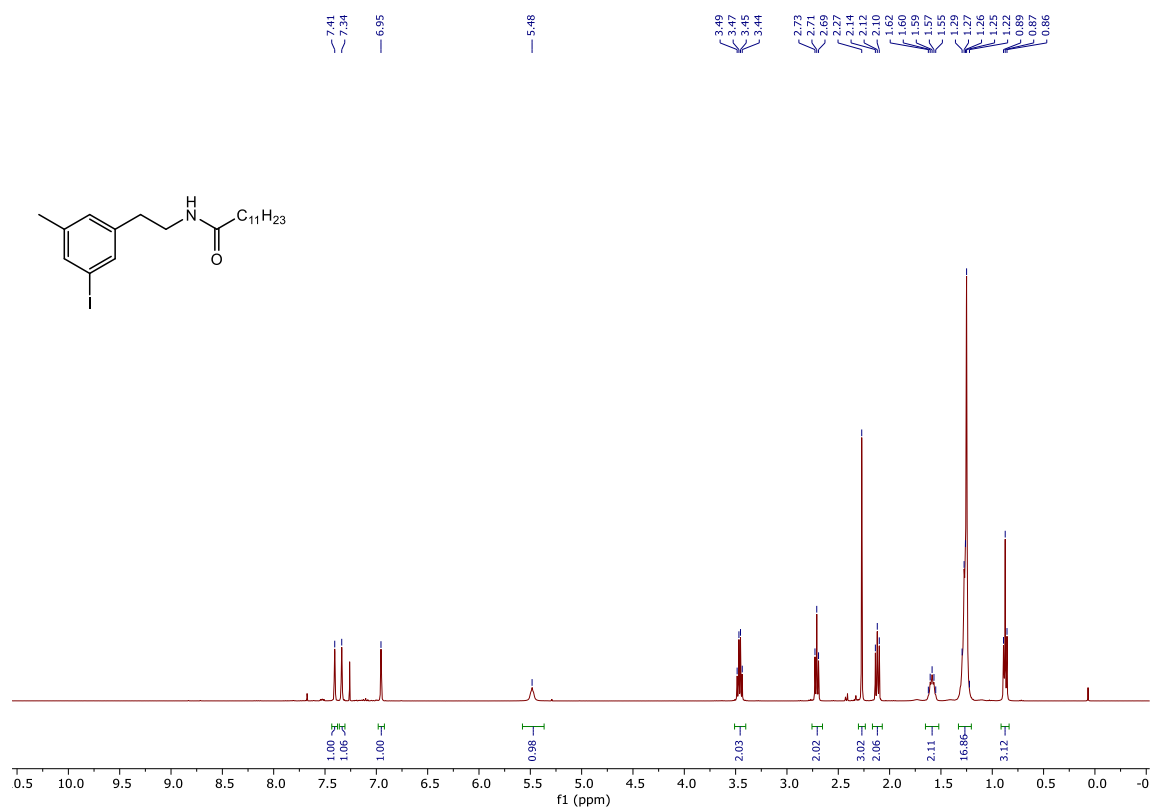

**$^{13}\text{C}$  NMR spectrum in  $\text{CDCl}_3$ :**

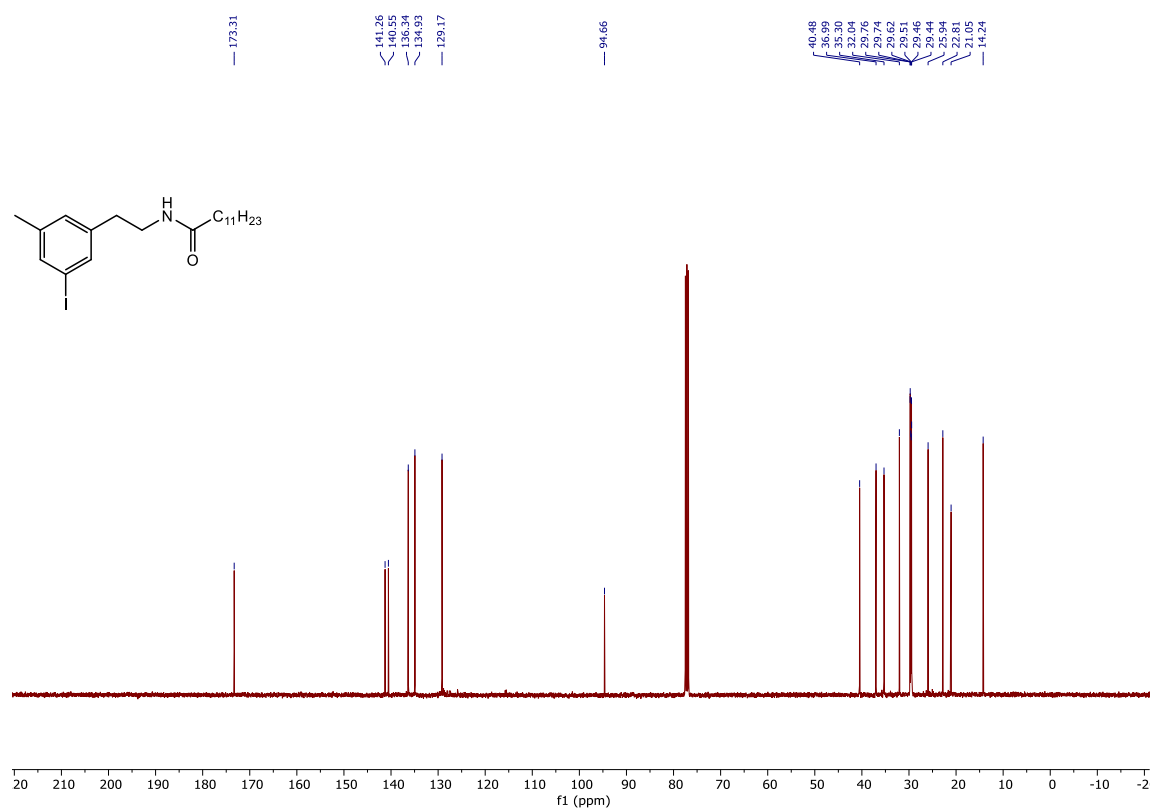

**ethyl 3-(2-iodo-5-methylphenyl)propanoate (3v- $\alpha$ ) and ethyl 3-(3-iodo-5-methylphenyl)propanoate (3v- $\beta$ )**

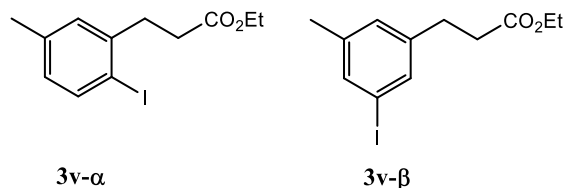

Following the general procedure B, using 1-iodo-2-nitrobenzene (**2**) (150 mg, 0.600 mmol, 3.0 equiv.), ethyl 3-(*m*-tolyl)propanoate (**1v**) (38.5 mg, 0.200 mmol), and purification via silica column chromatography using pentane:CH<sub>2</sub>Cl<sub>2</sub> = 9:1 as the eluent, the target compound **3v** was obtained as a colorless liquid (49.6 mg, 78%,  $\alpha$ : $\beta$  = 6:94).

**<sup>1</sup>H NMR (CDCl<sub>3</sub>, 400 MHz):**  $\delta$  = 7.67 (d, *J* = 8.0 Hz, 1H <sup>$\alpha$</sup> ), 7.38 (s, 1H <sup>$\beta$</sup> ), 7.36 (s, 1H <sup>$\beta$</sup> ), 7.07 (dd, *J* = 7.5, 1.8 Hz, 2H <sup>$\alpha$</sup> ), 6.97 (s, 1H <sup>$\beta$</sup> ), 6.72 (dd, *J* = 8.0, 1.8 Hz, 1H <sup>$\alpha$</sup> ), 4.20-4.08 (m, 2H <sup>$\alpha$</sup> +2H <sup>$\beta$</sup> ), 3.04-2.97 (m, 2H <sup>$\alpha$</sup> ), 2.85 (t, *J* = 7.7 Hz, 2H <sup>$\beta$</sup> ), 2.63-2.54 (m, 2H <sup>$\alpha$</sup> +2H <sup>$\beta$</sup> ), 2.27-2.26 (m, 3H <sup>$\alpha$</sup> +3H <sup>$\beta$</sup> ), 1.27-1.21 (m, 3H <sup>$\alpha$</sup> +3H <sup>$\beta$</sup> ) ppm.

**<sup>13</sup>C NMR (CDCl<sub>3</sub>, 100 MHz):**  $\delta$  = 172.7, 142.8, 140.4, 139.4, 136.1, 134.5, 130.6, 129.3, 128.8, 96.3, 94.5, 60.6, 35.9, 35.8, 34.7, 30.5, 21.1, 14.4 ppm.

**HRMS (ESI pos) *m/z*:** Calcd for C<sub>12</sub>H<sub>15</sub>O<sub>2</sub>INa<sup>+</sup> 341.0009, Found 341.0007.

**IR (cm<sup>-1</sup>):** 1730, 1559, 1507, 1457, 1374, 1244, 1180, 1155, 849, 552.

# <sup>1</sup>H NMR spectrum in CDCl<sub>3</sub>:

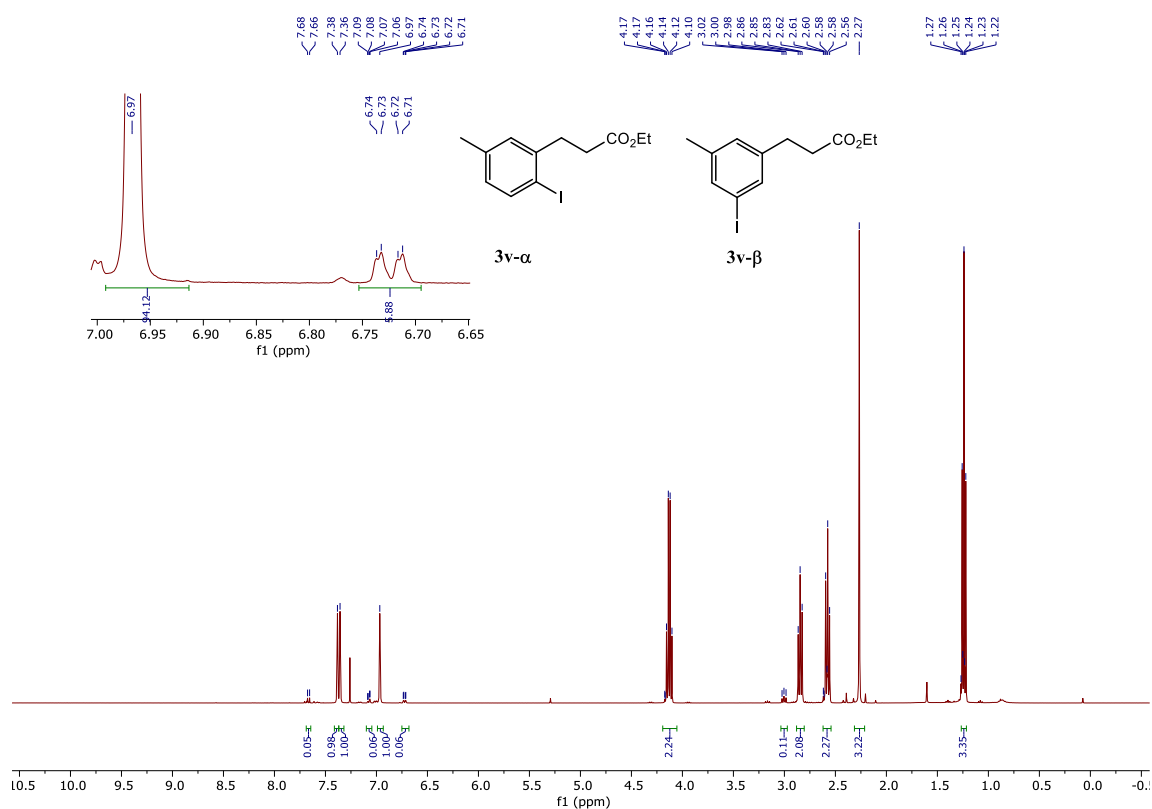

# <sup>13</sup>C NMR spectrum in CDCl<sub>3</sub>:

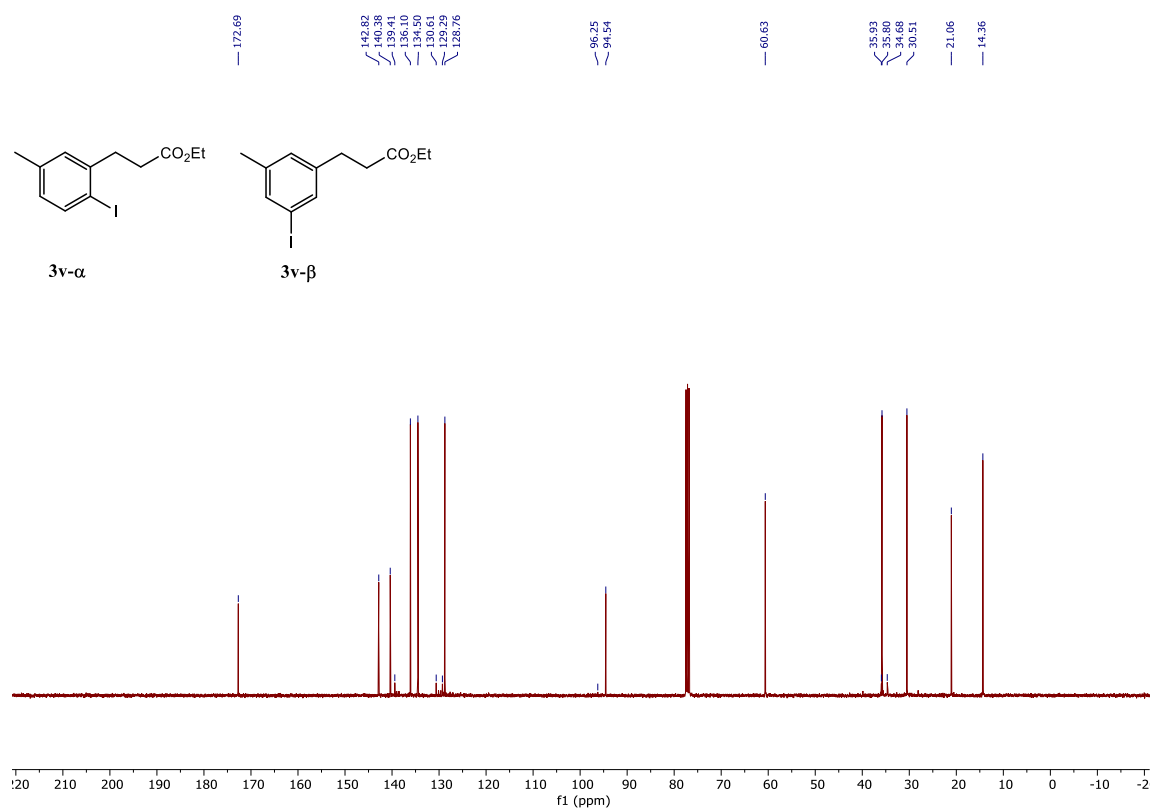



**5-iodo-1-methoxy-2,3-dimethylbenzene (3w)**

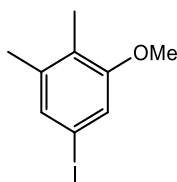

Following the general procedure B, using 1-iodo-2-nitrobenzene (**2**) (150 mg, 0.600 mmol, 3.0 equiv.), 1-methoxy-2,3-dimethylbenzene (**1w**) (27.2 mg, 0.200 mmol), and purification via silica column chromatography using pentane:CH<sub>2</sub>Cl<sub>2</sub> = 9:1 as the eluent, the target compound **3w** was obtained as a colorless liquid (32.5 mg, 62%).

**<sup>1</sup>H NMR (CDCl<sub>3</sub>, 400 MHz):**  $\delta$  = 7.14 (s, 1H), 7.00 (s, 1H), 3.79 (s, 3H), 2.21 (s, 3H), 2.08 (s, 3H) ppm.

**<sup>13</sup>C NMR (CDCl<sub>3</sub>, 100 MHz):**  $\delta$  = 158.2, 139.9, 131.2, 125.1, 117.3, 90.0, 55.9, 19.7, 11.6 ppm.

**HRMS (EI pos) m/z:** Calcd for C<sub>9</sub>H<sub>11</sub>OI<sup>+</sup> 261.9849, Found 261.9847.

**IR (cm<sup>-1</sup>):** 2981, 1570, 1473, 1457, 1397, 1299, 1258, 1113, 827, 560.

**$^1\text{H}$  NMR spectrum in  $\text{CDCl}_3$ :**

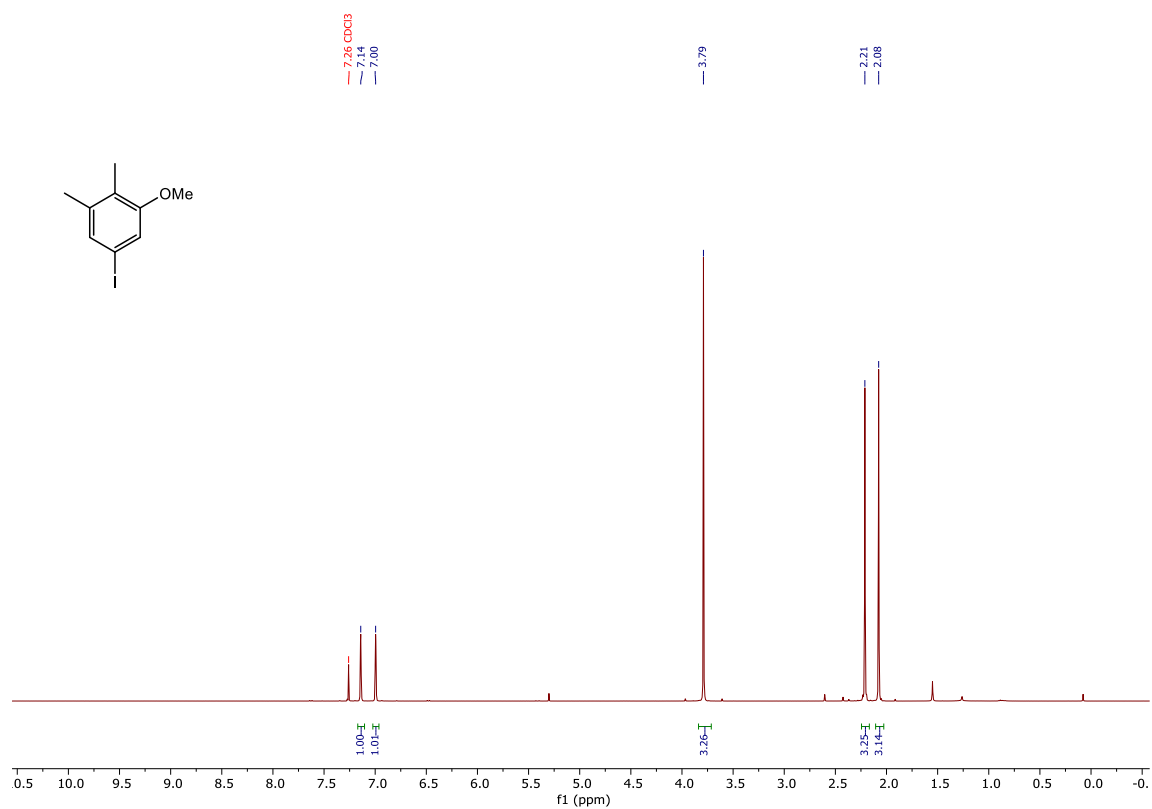

**$^{13}\text{C}$  NMR spectrum in  $\text{CDCl}_3$ :**

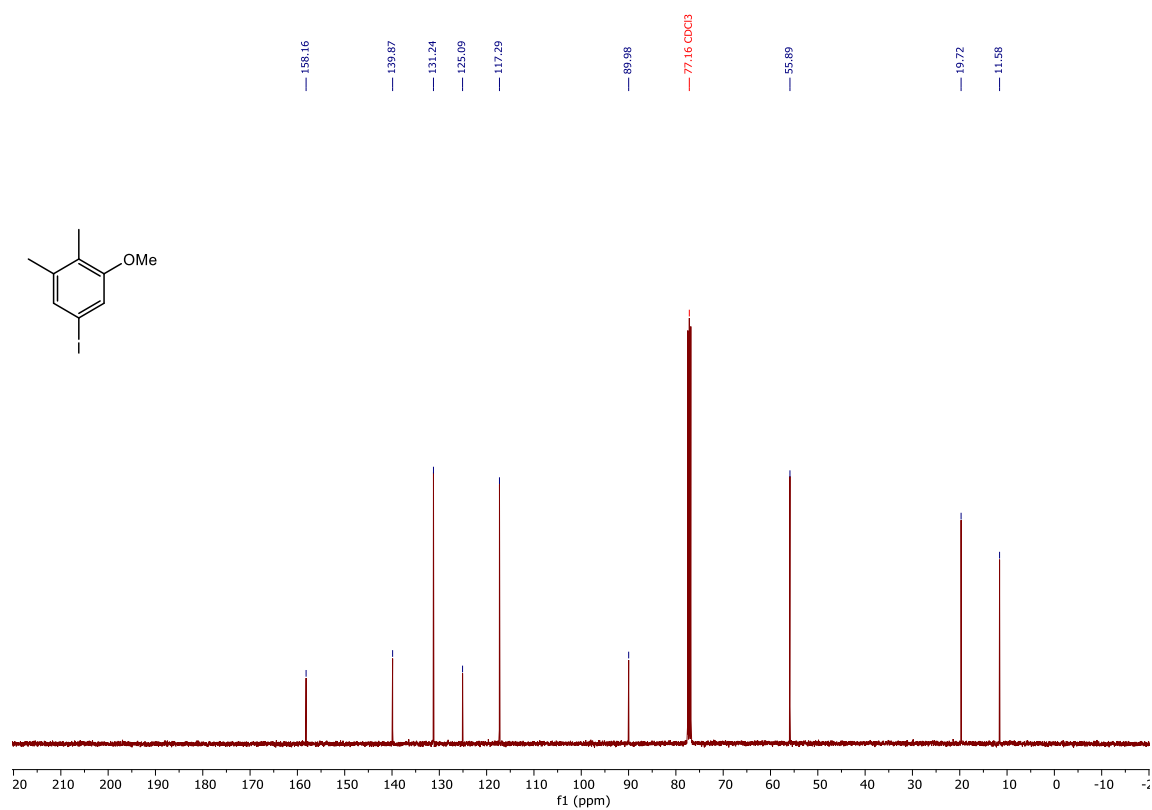

**1-fluoro-5-iodo-3-methoxy-2-methylbenzene (3x)**

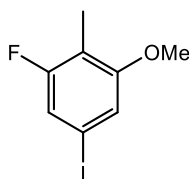

Following the general procedure B, using 1-iodo-2-nitrobenzene (**2**) (150 mg, 0.600 mmol, 3.0 equiv.), 1-fluoro-3-methoxy-2-methylbenzene (**1x**) (28.0 mg, 0.200 mmol), and purification via silica column chromatography using pentane:CH<sub>2</sub>Cl<sub>2</sub> = 19:1 as the eluent, the target compound **3x** was obtained as a colorless liquid (22.3 mg, 42%).

**<sup>1</sup>H NMR (CDCl<sub>3</sub>, 400 MHz):**  $\delta$  = 7.04 (d,  $J$  = 8.2 Hz, 1H), 6.92 (s, 1H), 3.81 (s, 3H), 2.06 (s, 3H) ppm.

**<sup>13</sup>C NMR (CDCl<sub>3</sub>, 100 MHz):**  $\delta$  = 161.4 (d,  $J$  = 247.1 Hz), 159.4 (d,  $J$  = 9.5 Hz), 117.4 (d,  $J$  = 26.2 Hz), 115.5 (d,  $J$  = 3.0 Hz), 114.1 (d,  $J$  = 19.3 Hz), 88.7 (d,  $J$  = 11.6 Hz), 56.2, 7.7 (d,  $J$  = 4.8 Hz) ppm.

**<sup>19</sup>F NMR (CDCl<sub>3</sub>, 375 MHz):**  $\delta$  = -115.1 ppm.

**HRMS (EI pos) m/z:** Calcd for C<sub>8</sub>H<sub>8</sub>OFI<sup>+</sup> 265.9598, Found 265.9598.

**IR (cm<sup>-1</sup>):** 1600, 1576, 1482, 1404, 1276, 1115, 833, 823, 557.

**$^1\text{H}$  NMR spectrum in  $\text{CDCl}_3$ :**

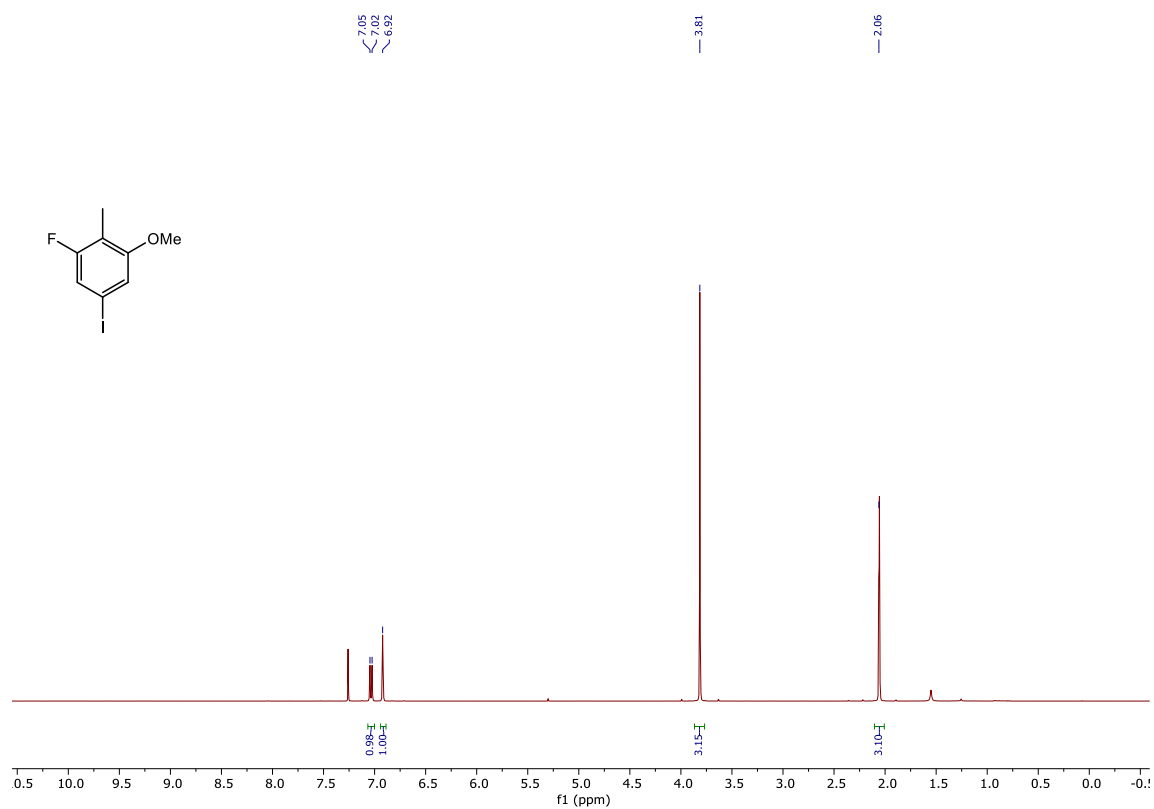

**$^{13}\text{C}$  NMR spectrum in  $\text{CDCl}_3$ :**

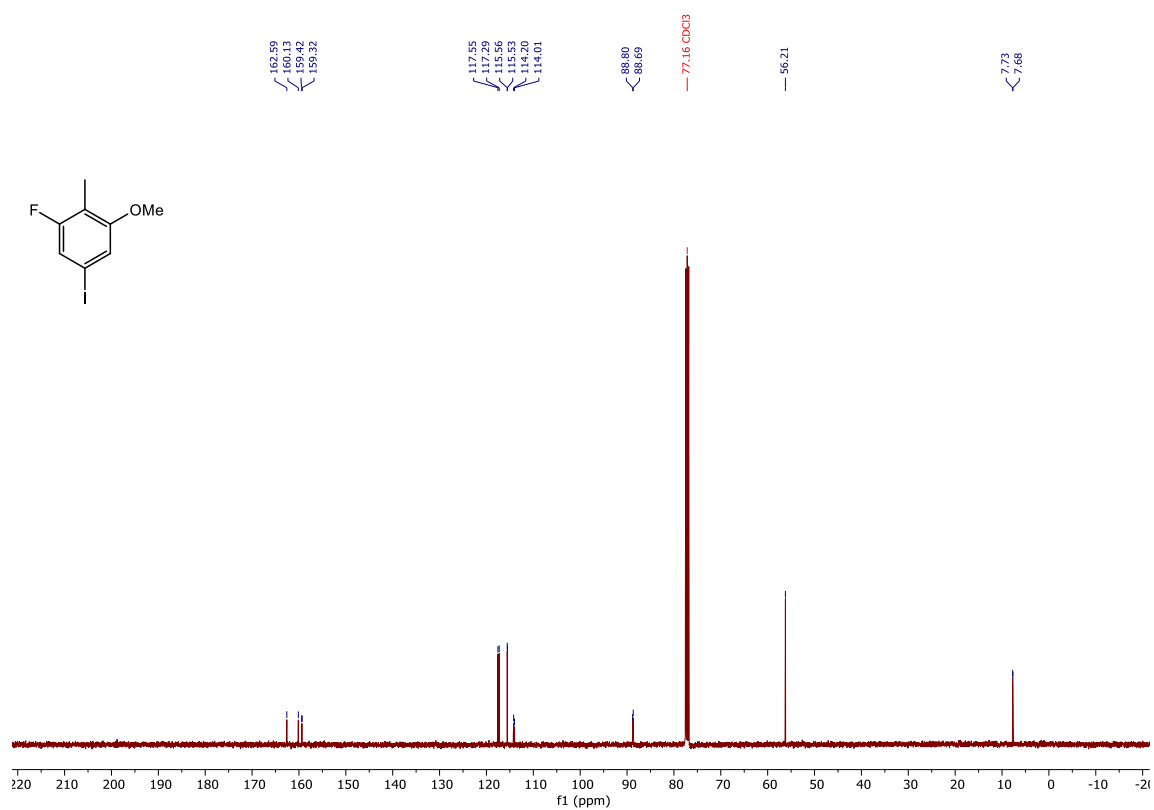

**$^{19}\text{F}$  NMR spectrum in  $\text{CDCl}_3$ :**

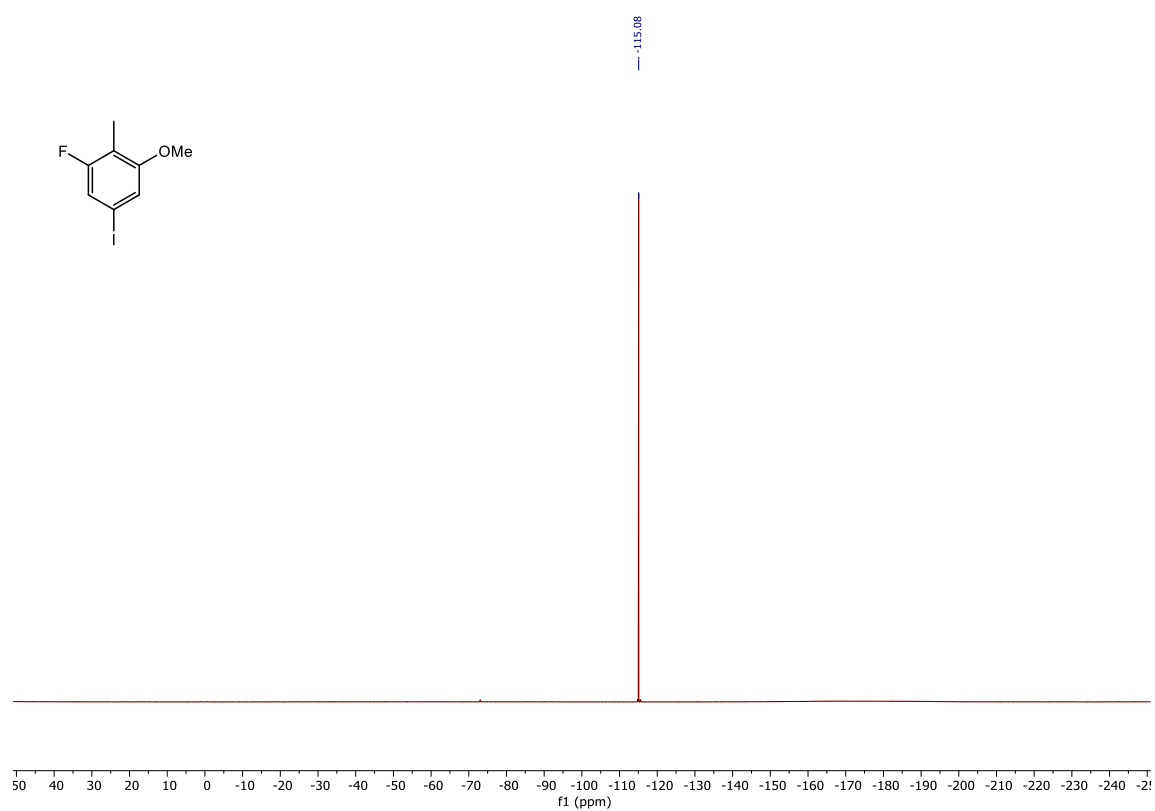

**methyl 4-iodo-2,6-dimethylbenzoate (3y)**

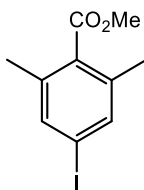

Following the general procedure B, using 1-iodo-2-nitrobenzene (**2**) (150 mg, 0.600 mmol, 3.0 equiv.), methyl 2,6-dimethylbenzoate (**1y**) (32.8 mg, 0.200 mmol), and purification via silica column chromatography using pentane:CH<sub>2</sub>Cl<sub>2</sub> = 1:1 as the eluent, the target compound **3y** was obtained as a colorless liquid (32.5 mg, 56%).

**<sup>1</sup>H NMR (CDCl<sub>3</sub>, 400 MHz):**  $\delta$  = 7.42 (s, 2H), 3.90 (s, 3H), 2.25 (s, 6H) ppm.

**<sup>13</sup>C NMR (CDCl<sub>3</sub>, 100 MHz):**  $\delta$  = 169.9, 137.2, 136.6, 133.5, 95.9, 52.2, 19.5 ppm.

**HRMS (ESI pos) m/z:** Calcd for C<sub>10</sub>H<sub>11</sub>O<sub>2</sub>INa<sup>+</sup> 312.9696, Found 312.9696.

**IR (cm<sup>-1</sup>):** 1726, 1576, 1457, 1262, 1122, 1081, 855, 835, 576.

**$^1\text{H}$  NMR spectrum in  $\text{CDCl}_3$ :**

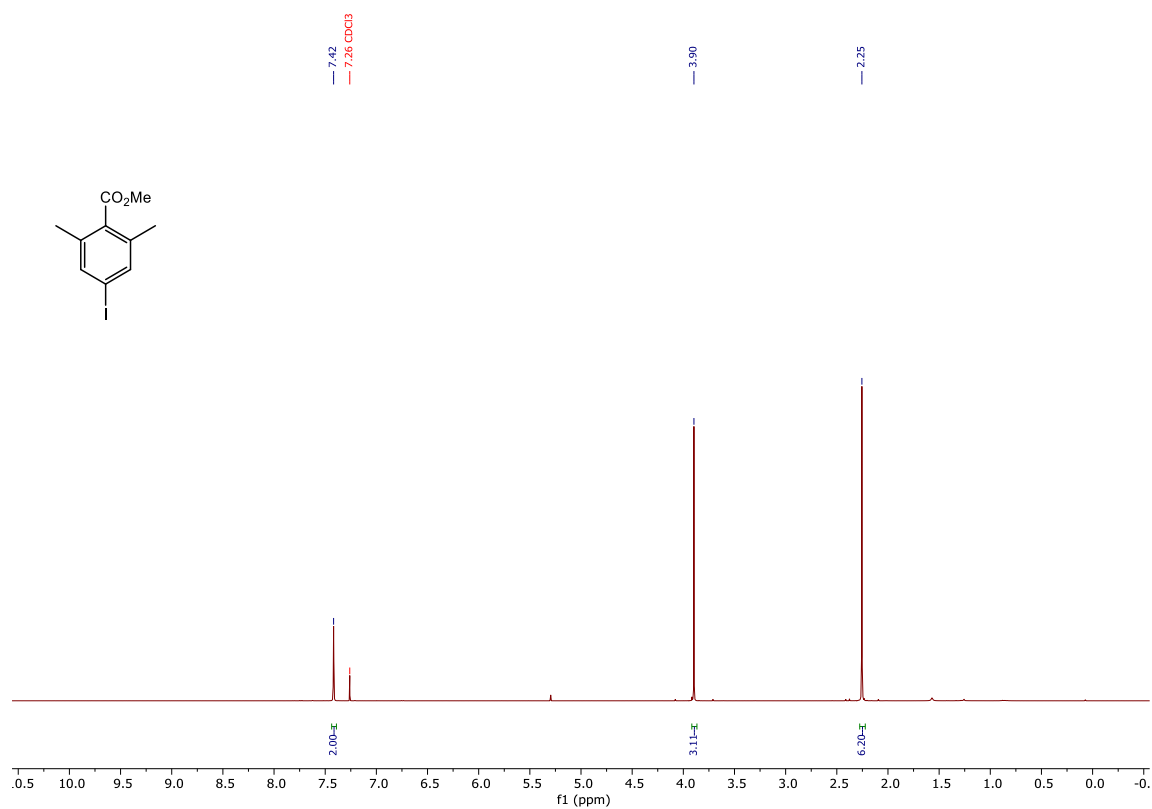

**$^{13}\text{C}$  NMR spectrum in  $\text{CDCl}_3$ :**

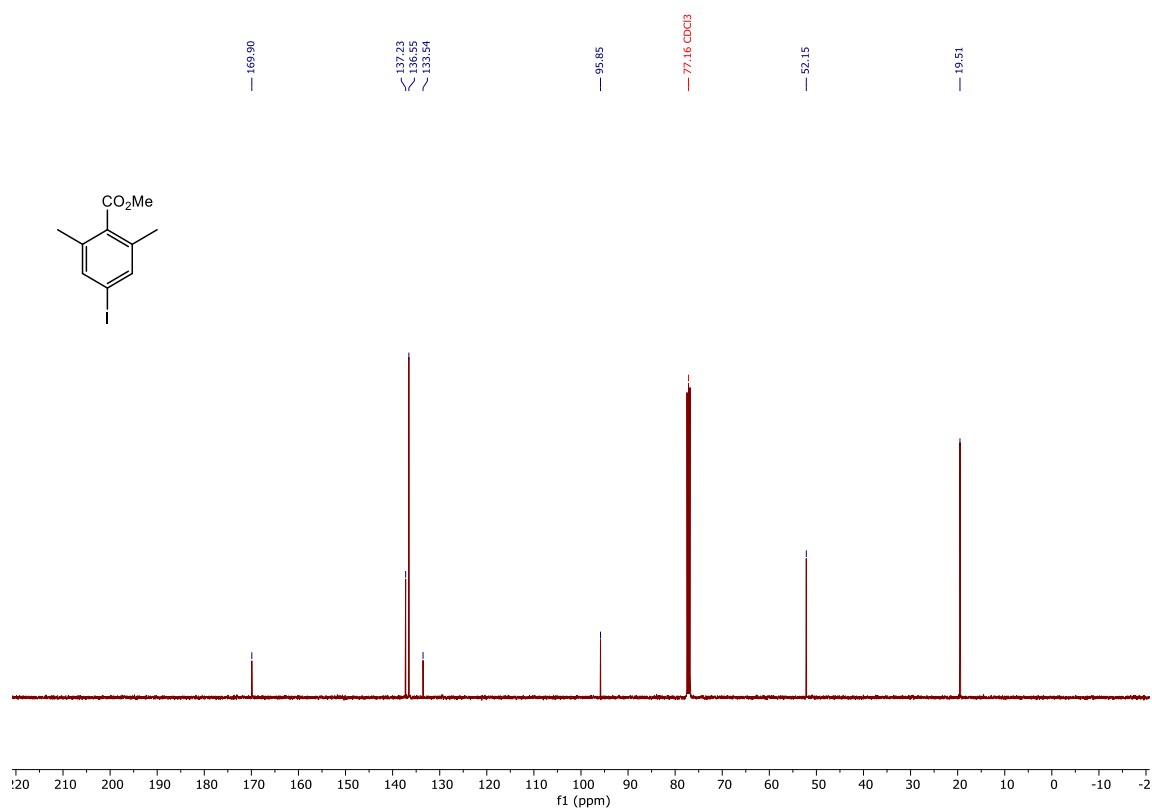

**methyl 4-iodo-2-methoxy-6-methylbenzoate (3z)**

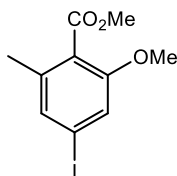

Following the general procedure B, using 1-iodo-2-nitrobenzene (**2**) (150 mg, 0.600 mmol, 3.0 equiv.), methyl 2-methoxy-6-methylbenzoate (**1z**) (36.0 mg, 0.200 mmol), and purification via silica column chromatography using pentane:CH<sub>2</sub>Cl<sub>2</sub> = 1:1 as the eluent, the target compound **3z** was obtained as a colorless liquid (23.3 mg, 38%).

**<sup>1</sup>H NMR (CDCl<sub>3</sub>, 400 MHz):**  $\delta$  = 7.19 (s, 1H), 7.08 (s, 1H), 3.89 (s, 3H), 3.80 (s, 3H), 2.23 (s, 3H) ppm.

**<sup>13</sup>C NMR (CDCl<sub>3</sub>, 100 MHz):**  $\delta$  = 168.3, 156.8, 138.3, 131.6, 123.6, 118.1, 95.8, 56.3, 52.4, 19.0 ppm.

**HRMS (EI pos) m/z:** Calcd for C<sub>10</sub>H<sub>11</sub>O<sub>3</sub>I<sup>+</sup> 305.9747, Found 305.9744.

**IR (cm<sup>-1</sup>):** 1730, 1570, 1457, 1264, 1121, 1080, 835, 556.



**$^1\text{H}$  NMR spectrum in  $\text{CDCl}_3$ :**

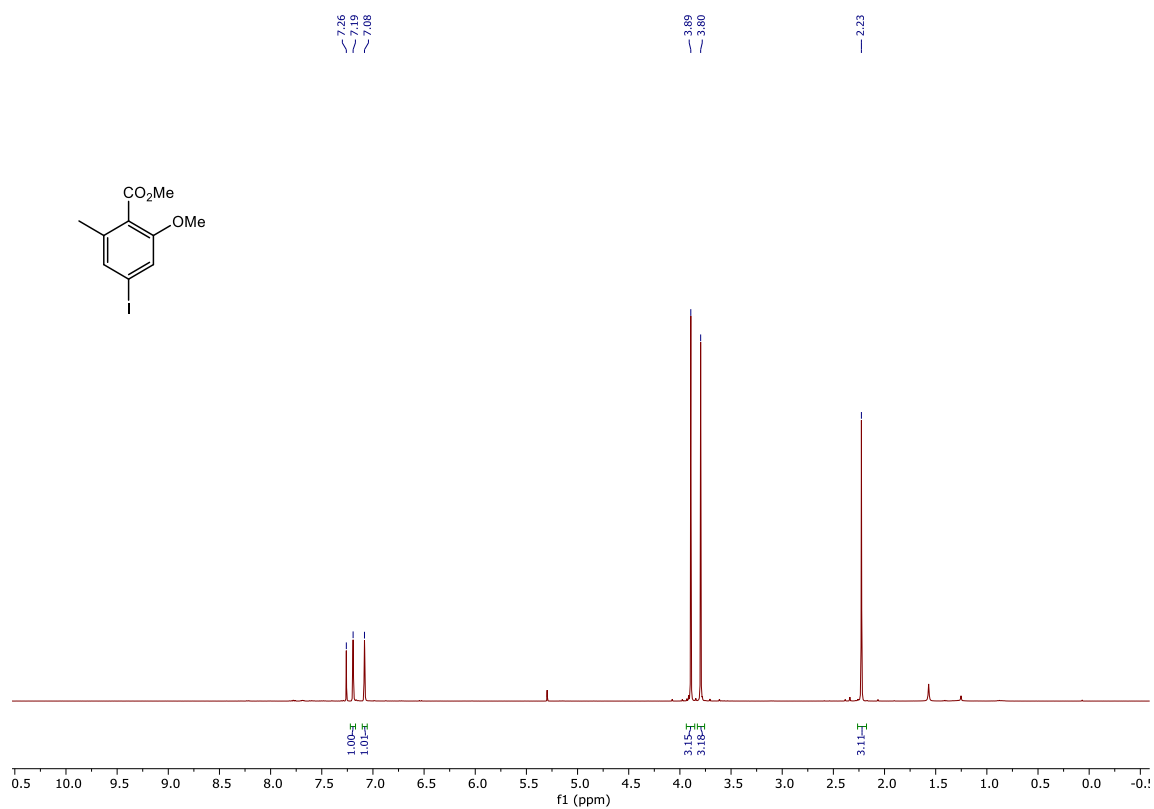

**$^{13}\text{C}$  NMR spectrum in  $\text{CDCl}_3$ :**

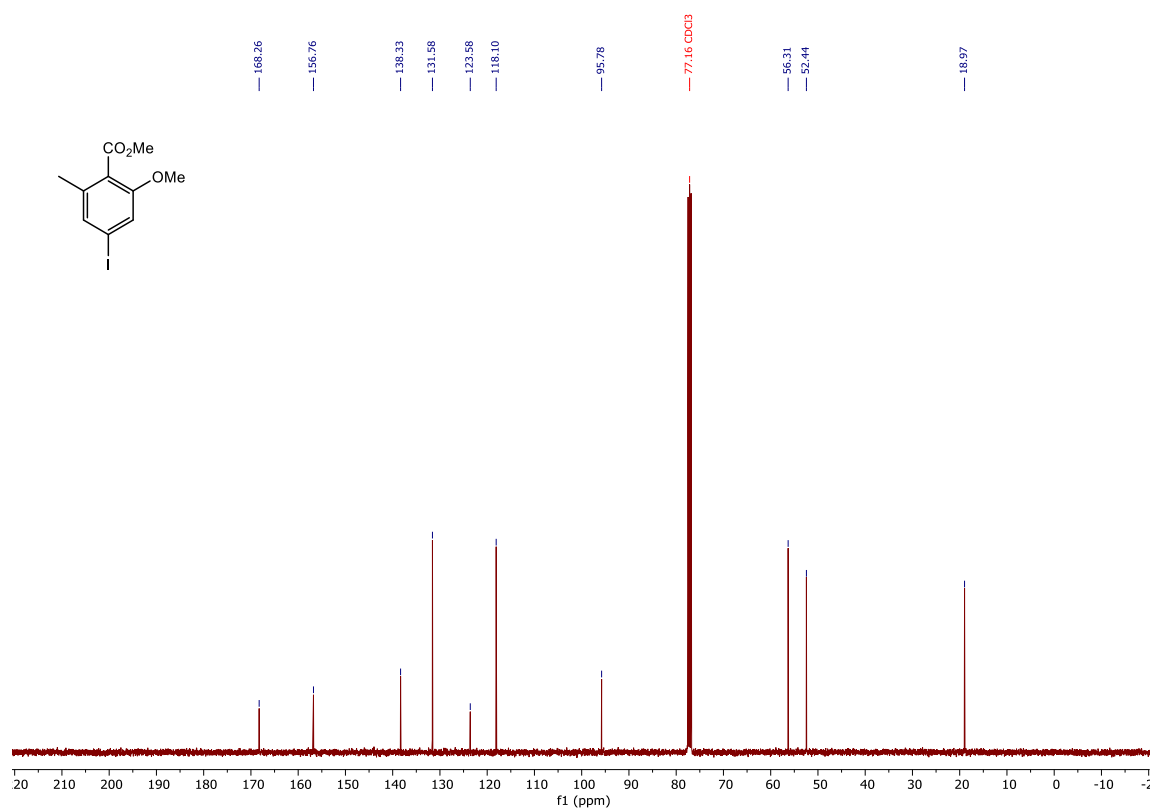

**methyl 4-iodo-2,6-dimethoxybenzoate (3aa)**

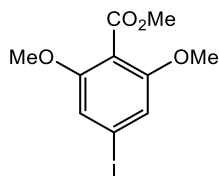

Following the general procedure B, using 1-iodo-2-nitrobenzene (**2**) (150 mg, 0.600 mmol, 3.0 equiv.), methyl 2,6-dimethoxybenzoate (**1aa**) (39.2 mg, 0.200 mmol), and purification via silica column chromatography using pentane:CH<sub>2</sub>Cl<sub>2</sub> = 1:4 as the eluent, the target compound **3aa** was obtained as a colorless liquid (14.2 mg, 22%).

**<sup>1</sup>H NMR (CDCl<sub>3</sub>, 400 MHz):**  $\delta$  = 6.90 (s, 2H), 3.89 (s, 3H), 3.80 (s, 6H) ppm.

**<sup>13</sup>C NMR (CDCl<sub>3</sub>, 100 MHz):**  $\delta$  = 166.4, 157.6, 114.0, 113.1, 95.9, 56.5, 52.7 ppm.

**HRMS (ESI pos) m/z:** Calcd for C<sub>10</sub>H<sub>11</sub>O<sub>4</sub>INa<sup>+</sup> 344.9594, Found 344.9592.

**IR (cm<sup>-1</sup>):** 1729, 1576, 1507, 1399, 1302, 1261, 1262, 1125, 1081, 835, 580.

**$^1\text{H}$  NMR spectrum in  $\text{CDCl}_3$ :**

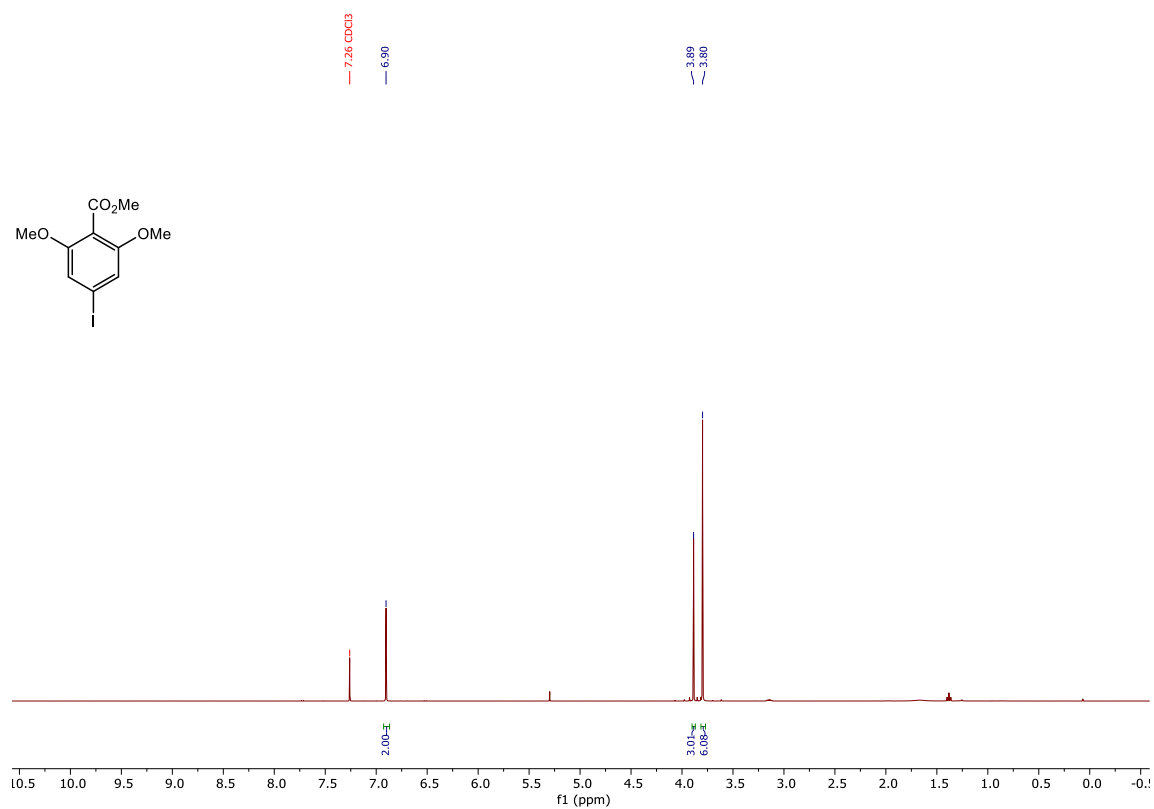

**$^{13}\text{C}$  NMR spectrum in  $\text{CDCl}_3$ :**

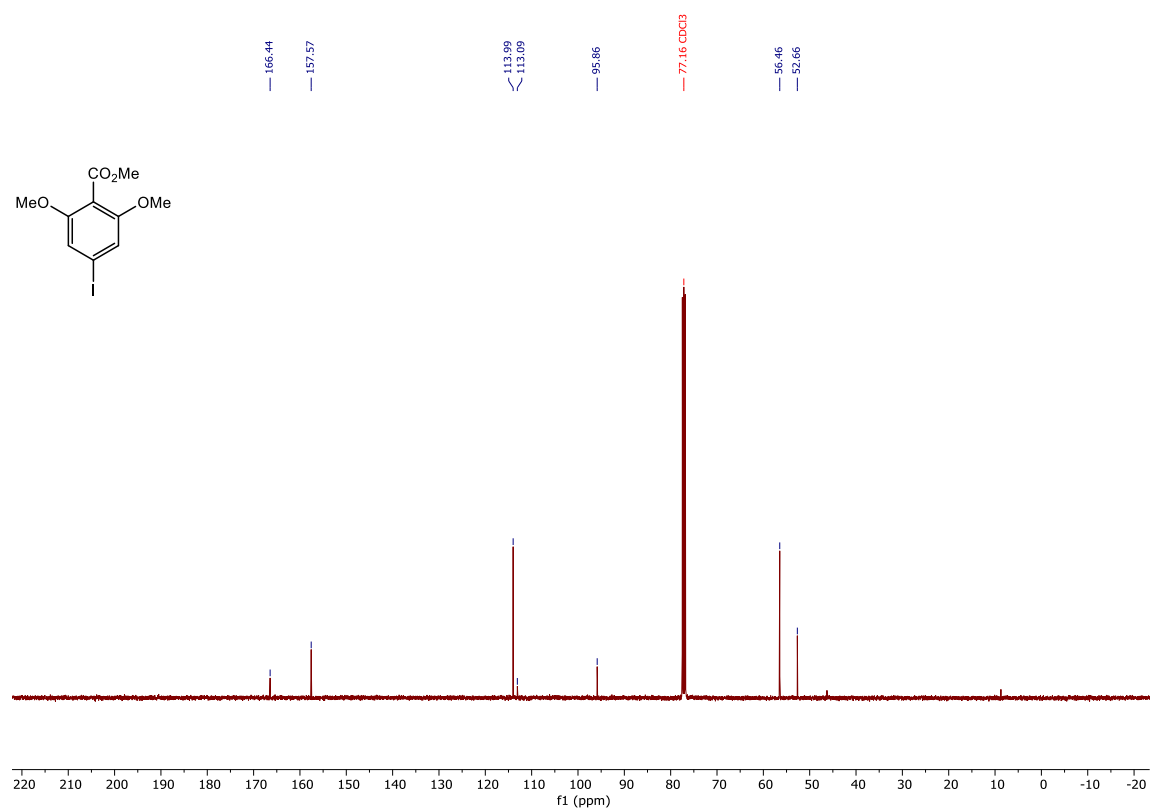

**1-(4-iodo-2,6-dimethylphenyl)ethan-1-one (3ab)**

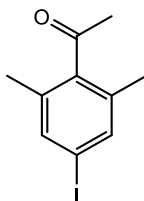

Following the general procedure B, using 1-iodo-2-nitrobenzene (**2**) (150 mg, 0.600 mmol, 3.0 equiv.), 1-(2,6-dimethylphenyl)ethan-1-one (**1ab**) (29.6 mg, 0.200 mmol), and purification via silica column chromatography using pentane:CH<sub>2</sub>Cl<sub>2</sub> = 1:4 as the eluent, the target compound **3ab** was obtained as a colorless liquid (28.5 mg, 52%). The assignment of the compound was achieved by comparison with the literature.<sup>11</sup>

**<sup>1</sup>H NMR (CDCl<sub>3</sub>, 400 MHz):**  $\delta$  = 7.40 (s, 2H), 2.44 (s, 3H), 2.19 (s, 6H) ppm.

**<sup>13</sup>C NMR (CDCl<sub>3</sub>, 100 MHz):**  $\delta$  = 207.5, 142.2, 136.7, 134.5, 94.6, 32.1, 18.9 ppm.

**$^1\text{H}$  NMR spectrum in  $\text{CDCl}_3$ :**

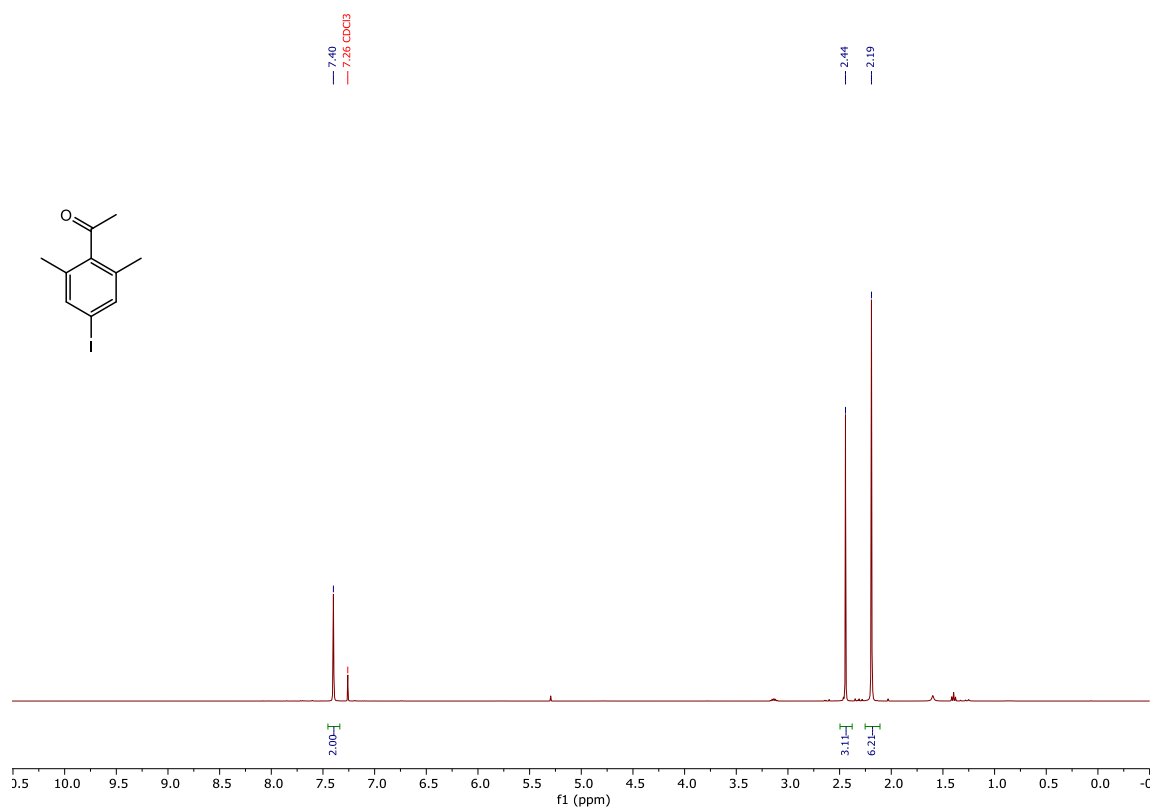

**$^{13}\text{C}$  NMR spectrum in  $\text{CDCl}_3$ :**

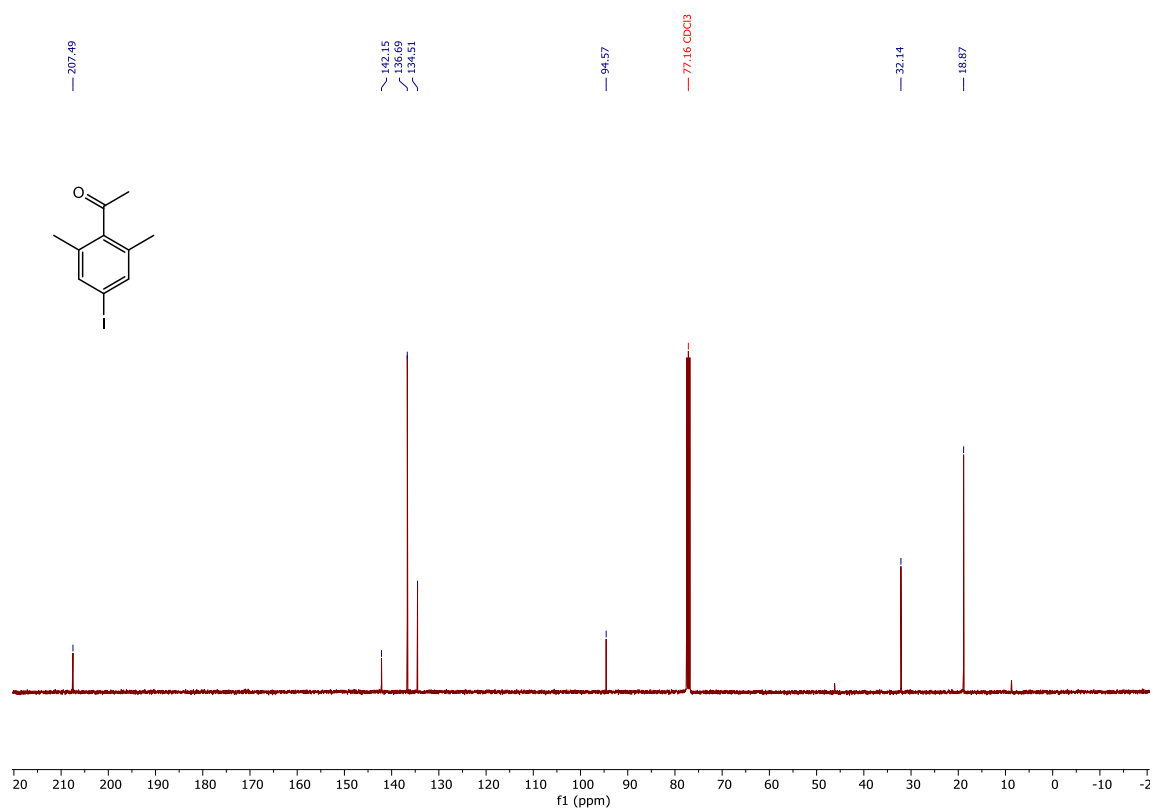

**5-iodo-1,3-diisopropyl-2-methoxybenzene (3ac)**

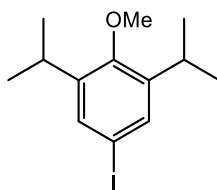

Following the general procedure B, using 1-iodo-2-nitrobenzene (**2**) (150 mg, 0.600 mmol, 3.0 equiv.), 1,3-diisopropyl-2-methoxybenzene (**1ac**) (38.5 mg, 0.200 mmol), and purification via silica column chromatography using pentane:CH<sub>2</sub>Cl<sub>2</sub> = 9:1 as the eluent, the target compound **3ac** was obtained as a colorless liquid (52.3 mg, 82%).

**<sup>1</sup>H NMR (CDCl<sub>3</sub>, 400 MHz):**  $\delta$  = 7.38 (s, 2H), 3.71 (s, 3H), 3.26 (hept,  $J$  = 6.9 Hz, 2H), 1.21 (d,  $J$  = 6.9 Hz, 12H) ppm.

**<sup>13</sup>C NMR (CDCl<sub>3</sub>, 100 MHz):**  $\delta$  = 154.7, 144.7, 133.6, 89.4, 62.4, 26.7, 24.1 ppm.

**HRMS (EI pos) m/z:** Calcd for C<sub>13</sub>H<sub>19</sub>OI<sup>+</sup> 318.0475, Found 318.0473.

**IR (cm<sup>-1</sup>):** 2962, 2931, 1458, 1425, 1325, 1199, 1167, 1010, 865, 817, 788, 700, 552.

**$^1\text{H}$  NMR spectrum in  $\text{CDCl}_3$ :**

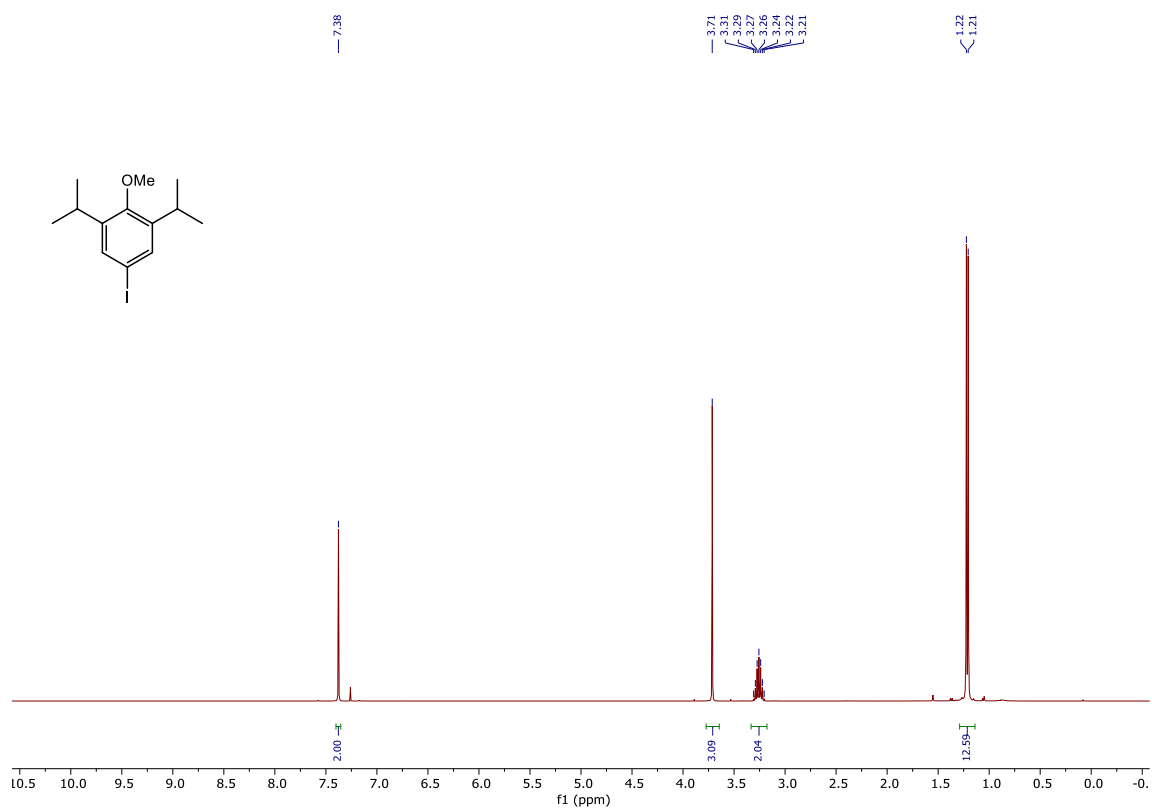

**$^{13}\text{C}$  NMR spectrum in  $\text{CDCl}_3$ :**

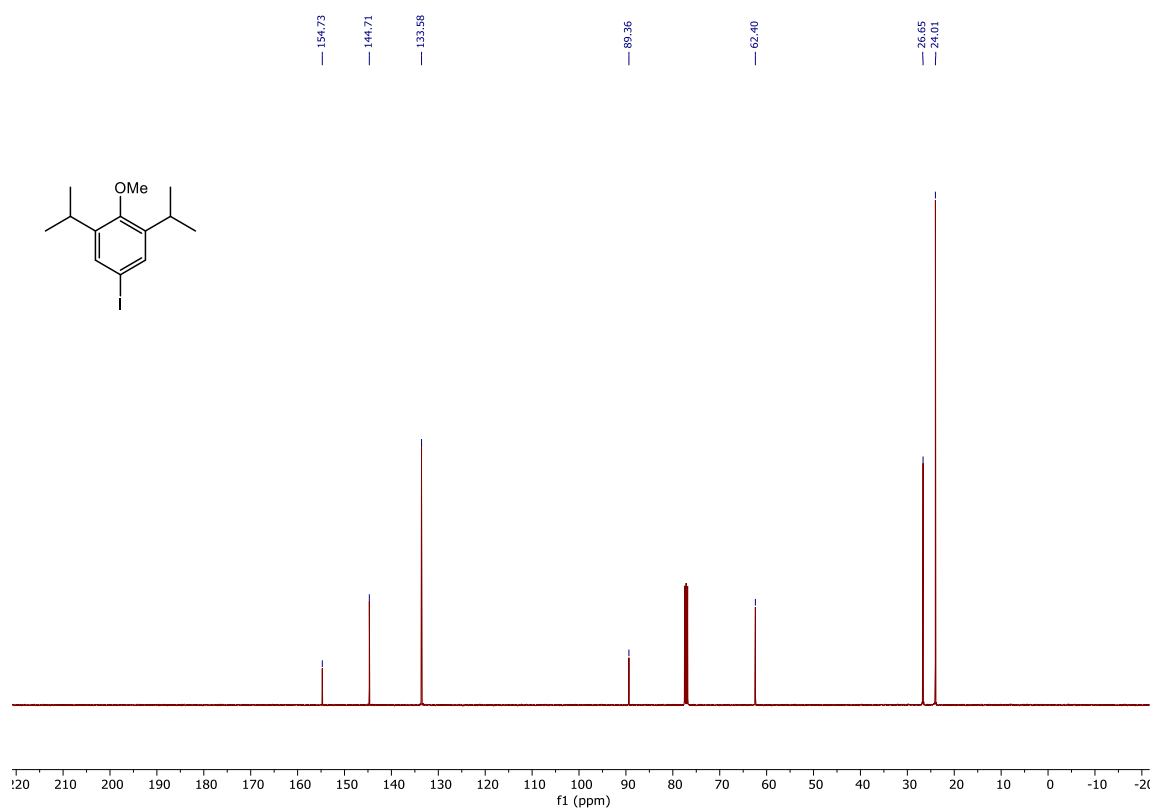

**4'-fluoro-3-iodo-5-methyl-1,1'-biphenyl (3ad- $\beta$ ) and 4'-fluoro-4-iodo-3-methyl-1,1'-biphenyl (3ad- $\gamma$ )**

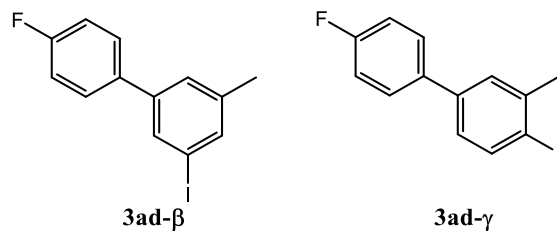

Following the general procedure B, using 1-iodo-2-nitrobenzene (**2**) (150 mg, 0.600 mmol, 3.0 equiv.), 4'-fluoro-3-methyl-1,1'-biphenyl (**1ad**) (37.2 mg, 0.200 mmol), and purification via silica column chromatography using pentane as the eluent, the target compound **3ad** was obtained as a colorless liquid (19.9 mg, 32%,  $\beta$ : $\gamma$  = 93:7).

**$^1\text{H}$  NMR (CDCl<sub>3</sub>, 600 MHz):**  $\delta$  = 7.85 (d,  $J$  = 8.1 Hz, 1H $^\gamma$ ), 7.68 (s, 1H $^\beta$ ), 7.52 (s, 1H $^\beta$ ), 7.52-7.46 (m, 2H $^\beta$ +2H $^\gamma$ ), 7.40 (d,  $J$  = 2.3 Hz, 1H $^\gamma$ ), 7.29 (s, 1H $^\beta$ ), 7.14-7.09 (m, 2H $^\beta$ +2H $^\gamma$ ), 7.04 (dd,  $J$  = 8.1, 2.3 Hz, 1H $^\gamma$ ), 2.49 (s, 3H $^\gamma$ ), 2.36 (s, 3H $^\beta$ ) ppm.

**$^{13}\text{C}$  NMR (CDCl<sub>3</sub>, 150 MHz):**  $\delta$  = 162.8 (d,  $J$  = 247.2 Hz), 142.4, 140.7, 137.0, 136.0 (d,  $J$  = 3.3 Hz), 133.3, 128.9 (d,  $J$  = 8.1 Hz), 127.4, 115.9 (d,  $J$  = 21.5 Hz), 94.9, 21.2 ppm.

**$^{19}\text{F}$  NMR (CDCl<sub>3</sub>, 564 MHz):**  $\delta$  = -114.92, -115.14 ppm.

**HRMS (EI pos) m/z:** Calcd for C<sub>13</sub>H<sub>10</sub>FI<sup>+</sup> 311.9811, Found 311.9813.



**$^1\text{H}$  NMR spectrum in  $\text{CDCl}_3$ :**

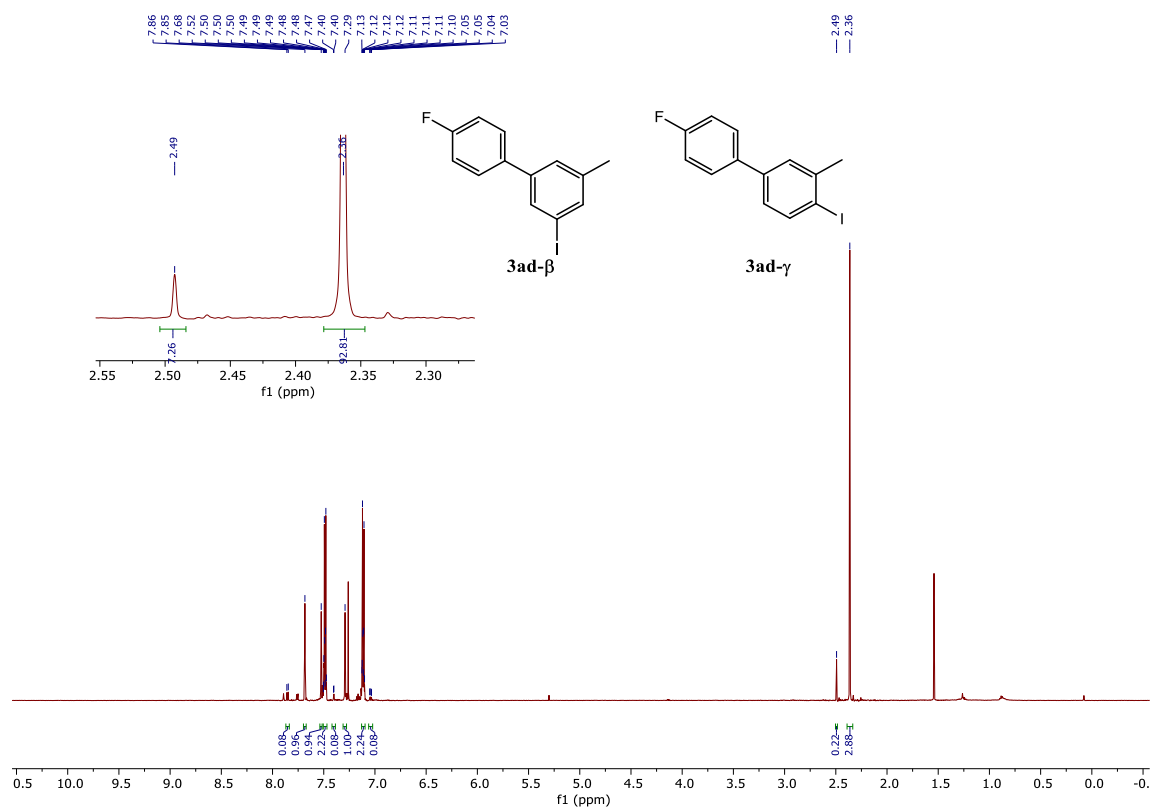

**$^{13}\text{C}$  NMR spectrum in  $\text{CDCl}_3$ :**

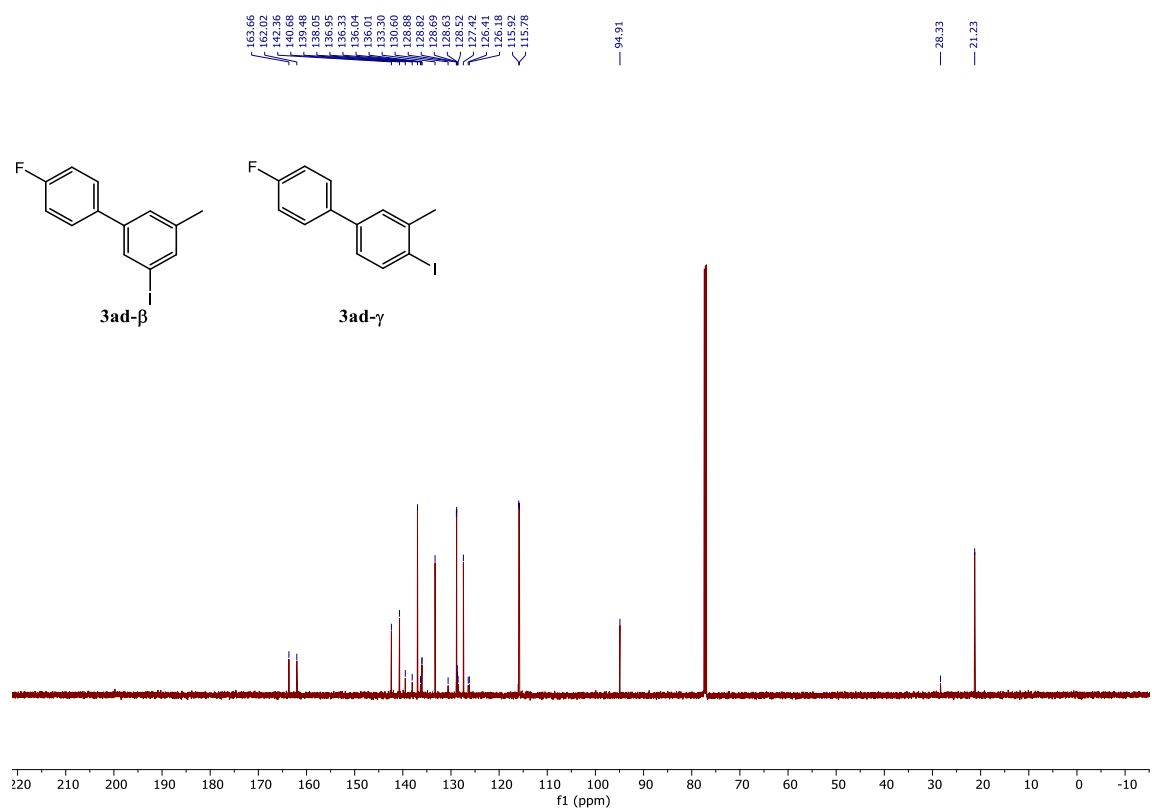

**$^{19}\text{F}$  NMR spectrum in  $\text{CDCl}_3$ :**

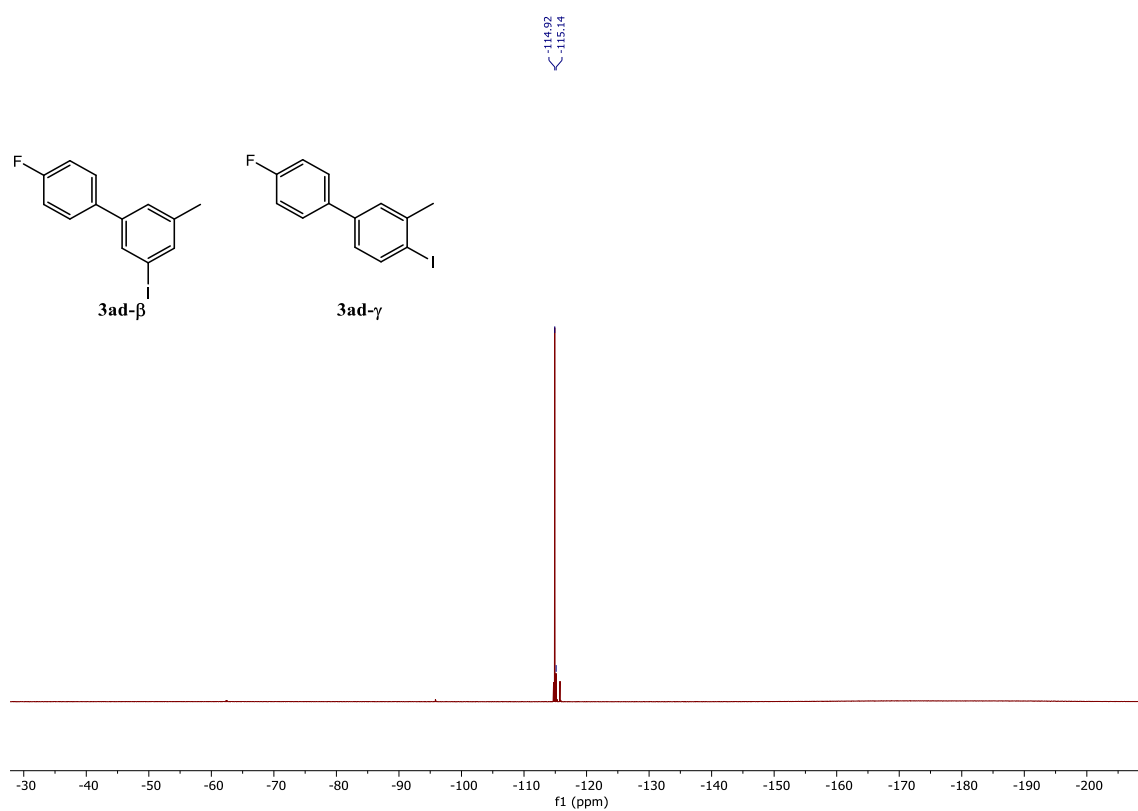

**3-iodo-5-methyl-4'-(trifluoromethyl)-1,1'-biphenyl (3ae- $\beta$ ) and 4-iodo-3-methyl-4'-(trifluoromethyl)-1,1'-biphenyl (3ae- $\gamma$ )**

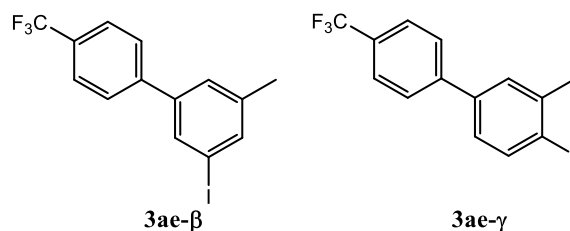

Following the general procedure B, using 1-iodo-2-nitrobenzene (**2**) (150 mg, 0.600 mmol, 3.0 equiv.), 3-methyl-4'-(trifluoromethyl)-1,1'-biphenyl (**1ae**) (47.2 mg, 0.200 mmol), and purification via silica column chromatography using pentane as the eluent, the target compound **3ae** was obtained as a colorless liquid (21.7 mg, 30%,  $\beta$ : $\gamma$  = 96:4).

**$^1\text{H}$  NMR (CDCl<sub>3</sub>, 600 MHz):**  $\delta$  = 7.90 (d,  $J$  = 8.1 Hz, 1H $^\gamma$ ), 7.73 (s, 1H $^\beta$ ), 7.71-7.61 (m, 4H $^\beta$ +4H $^\gamma$ ), 7.59 (s, 1H $^\beta$ ), 7.45 (d,  $J$  = 2.3 Hz, 1H $^\gamma$ ), 7.35 (s, 1H $^\beta$ ), 7.10 (dd,  $J$  = 8.1, 2.3 Hz, 1H $^\gamma$ ), 2.51 (s, 3H $^\gamma$ ), 2.38 (s, 3H $^\beta$ ) ppm.

**$^{13}\text{C}$  NMR (CDCl<sub>3</sub>, 150 MHz):**  $\delta$  = 143.4 (q,  $J$  = 1.2 Hz), 141.9, 140.9, 138.5 (q,  $J$  = 370.3 Hz), 137.9, 133.5, 130.0 (q,  $J$  = 32.6 Hz), 127.7, 127.6, 125.9 (q,  $J$  = 3.8 Hz), 95.0, 21.2 ppm.

**$^{19}\text{F}$  NMR (CDCl<sub>3</sub>, 564 MHz):**  $\delta$  = -62.5(0), -62.5(3) ppm.

**HRMS (EI pos) m/z:** Calcd for C<sub>14</sub>H<sub>10</sub>F<sub>3</sub>I<sup>+</sup> 361.9779, Found 361.9778.

**$^1\text{H}$  NMR spectrum in  $\text{CDCl}_3$ :**

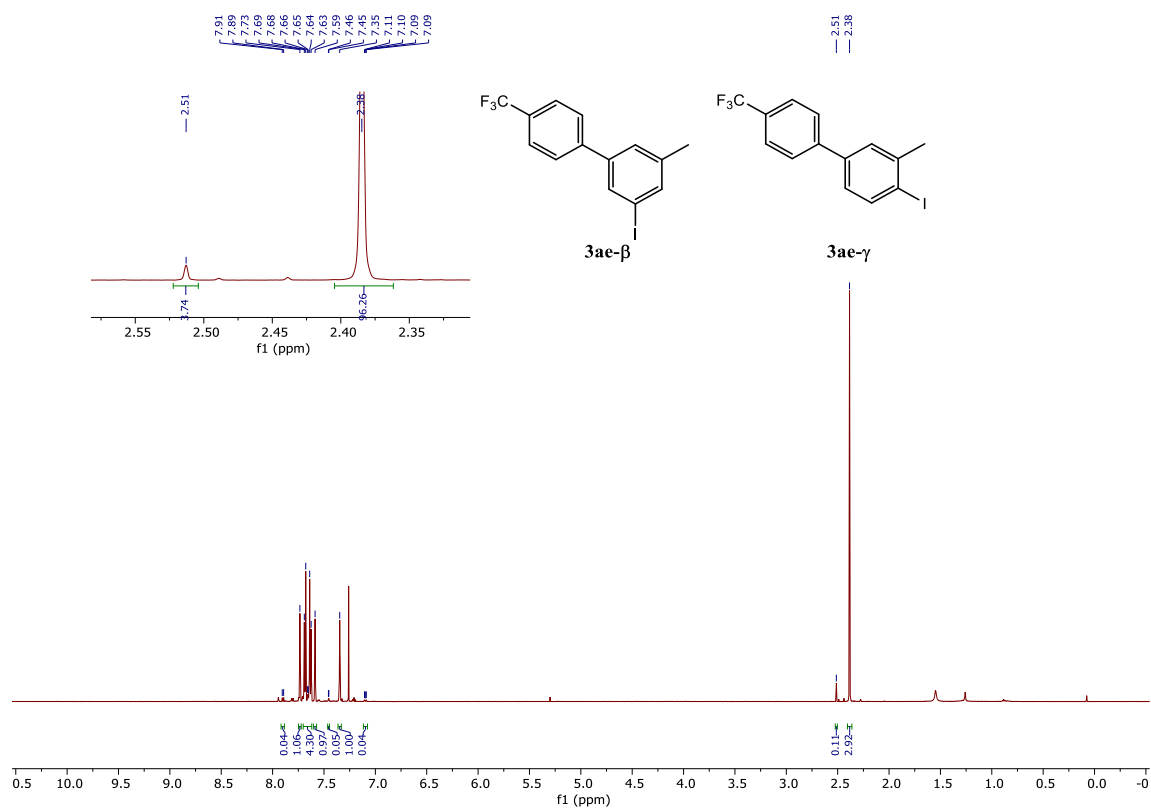

**$^{13}\text{C}$  NMR spectrum in  $\text{CDCl}_3$ :**

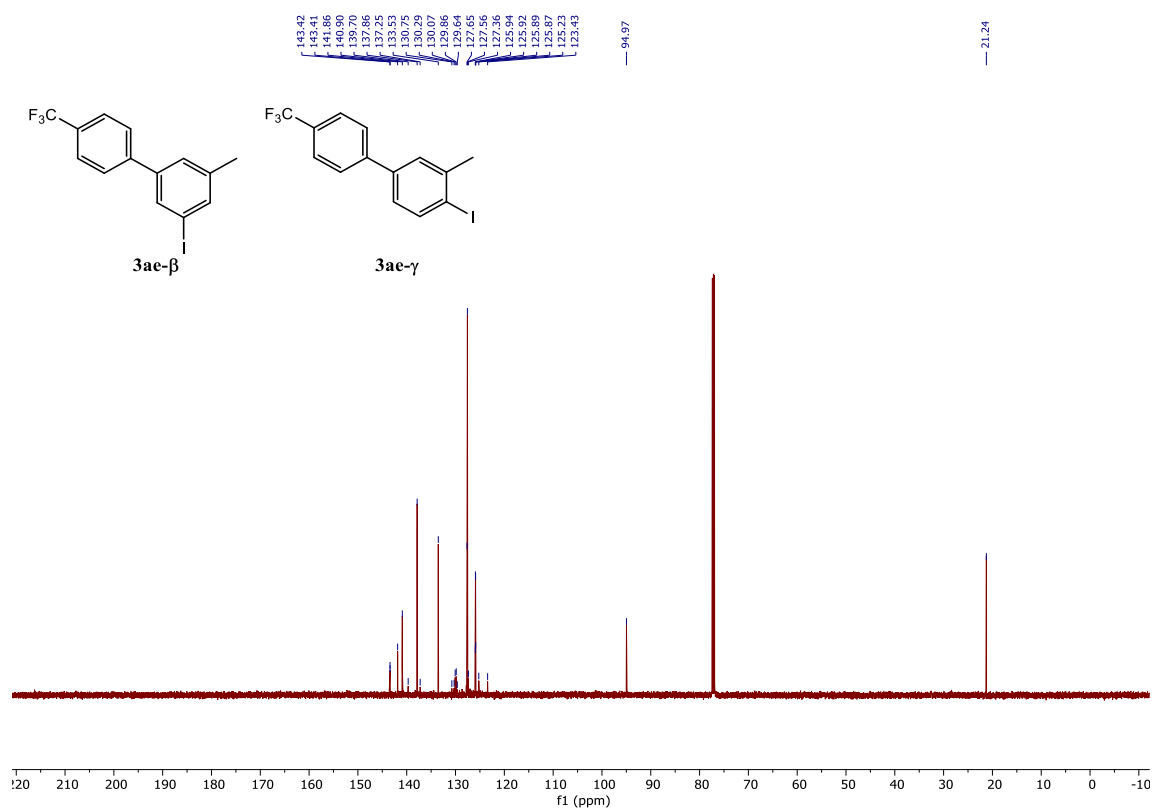

**$^{19}\text{F}$  NMR spectrum in  $\text{CDCl}_3$ :**

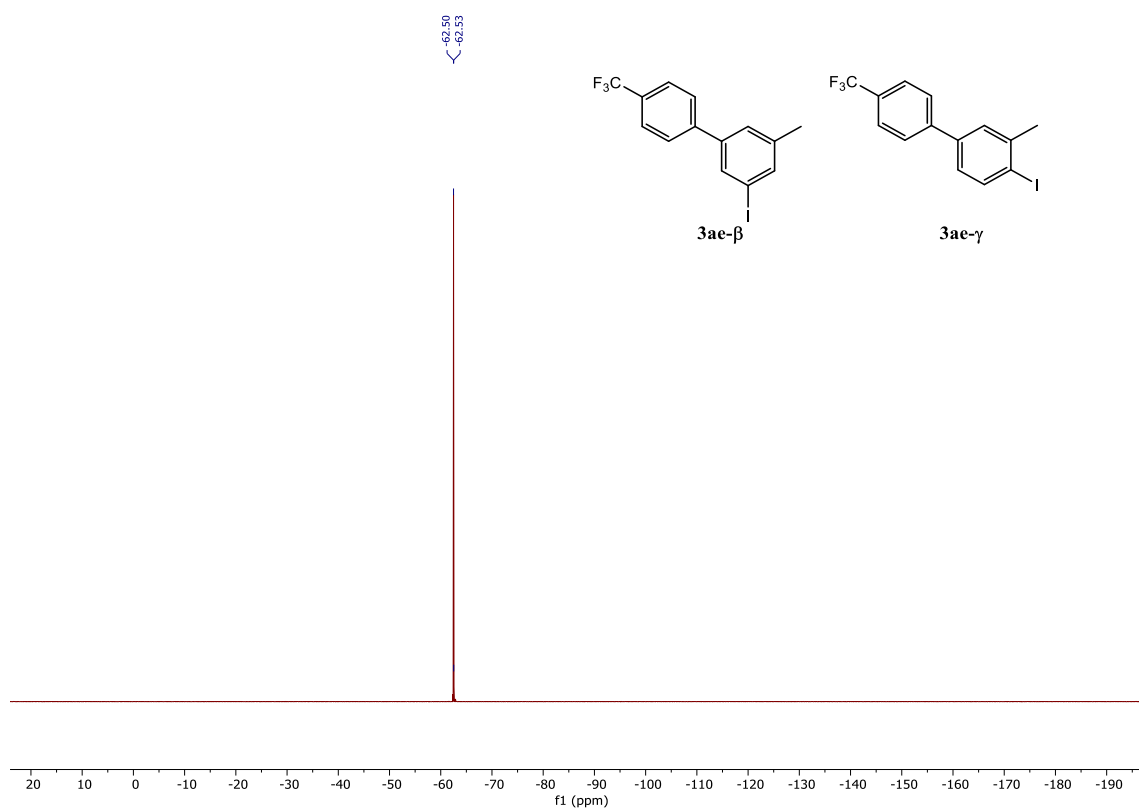

**methyl 5-iodo-2-methyl-4'-(trifluoromethoxy)-[1,1'-biphenyl]-3-carboxylate (3af)**

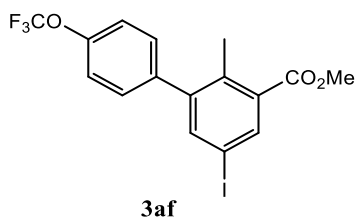

Following the general procedure B, using 1-iodo-2-nitrobenzene (**2**) (150 mg, 0.600 mmol, 3.0 equiv.), methyl 2-methyl-4'-(trifluoromethoxy)-[1,1'-biphenyl]-3-carboxylate (**1af**) (62.1 mg, 0.200 mmol), and purification via silica column chromatography using pentane:CH<sub>2</sub>Cl<sub>2</sub> = 3:2 as the eluent, the target compound **3af** was obtained as a colorless liquid (26.0 mg, 30%).

**<sup>1</sup>H NMR (CDCl<sub>3</sub>, 600 MHz):**  $\delta$  = 8.14 (d,  $J$  = 1.9 Hz, 1H), 7.67 (d,  $J$  = 1.9 Hz, 1H), 7.28 (s, 4H), 3.92 (s, 3H), 2.33 (s, 3H) ppm.

**<sup>13</sup>C NMR (CDCl<sub>3</sub>, 150 MHz):**  $\delta$  = 167.2, 148.9, 144.5, 141.7, 138.7, 138.3, 136.7, 133.3, 130.8, 121.0, 120.6 (d,  $J$  = 257.5 Hz), 89.8, 52.5, 18.3 ppm.

**<sup>19</sup>F NMR (CDCl<sub>3</sub>, 564 MHz):**  $\delta$  = -57.80 ppm.

**HRMS (ESI pos) m/z:** Calcd for C<sub>16</sub>H<sub>12</sub>O<sub>3</sub>F<sub>3</sub>INa<sup>+</sup> 458.9675, Found 458.9675.

**IR (cm<sup>-1</sup>):** 1730, 1559, 1507, 1257, 1206, 1165, 1079, 565.

**$^1\text{H}$  NMR spectrum in  $\text{CDCl}_3$ :**

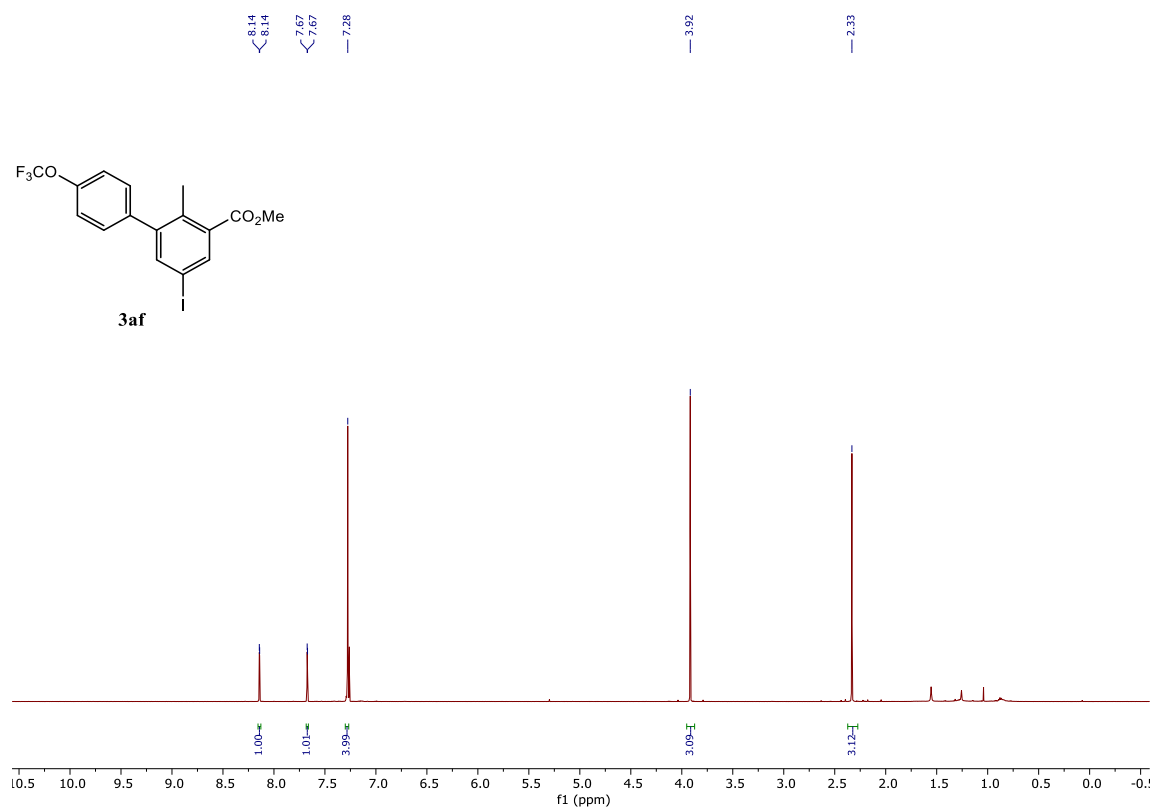

**$^{13}\text{C}$  NMR spectrum in  $\text{CDCl}_3$ :**

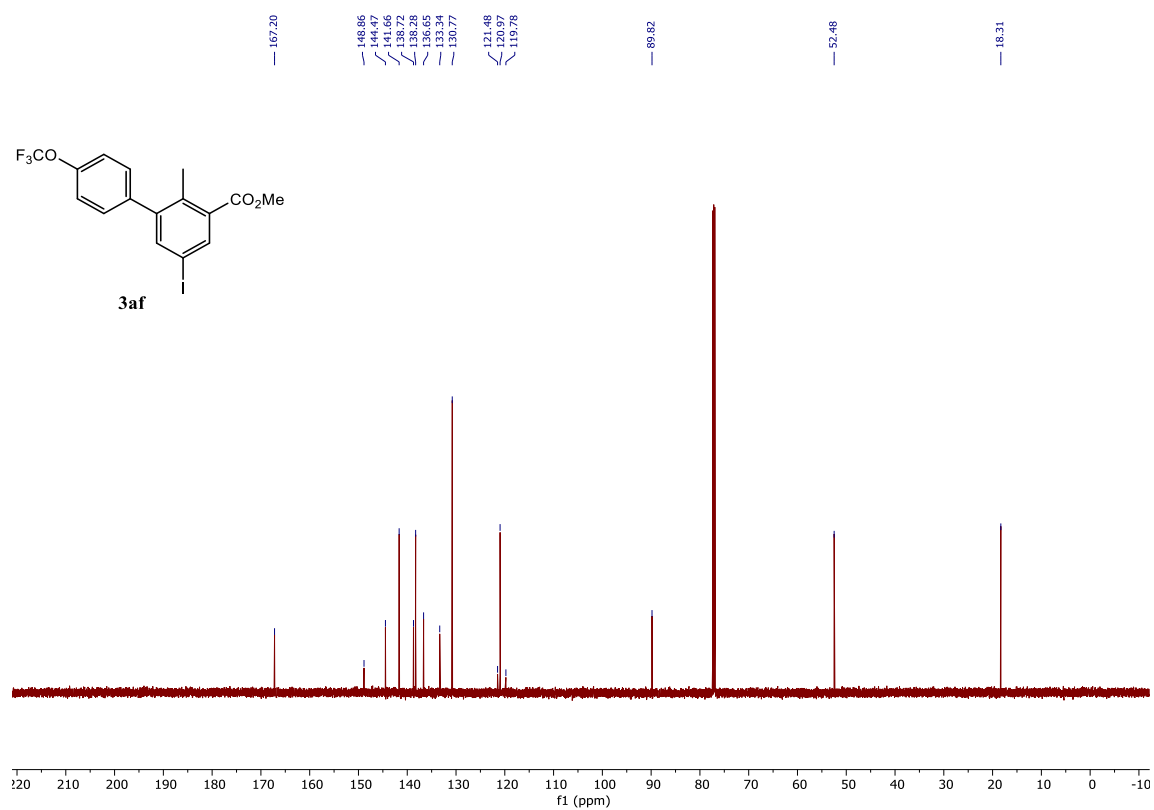

**$^{19}\text{F}$  NMR spectrum in  $\text{CDCl}_3$ :**

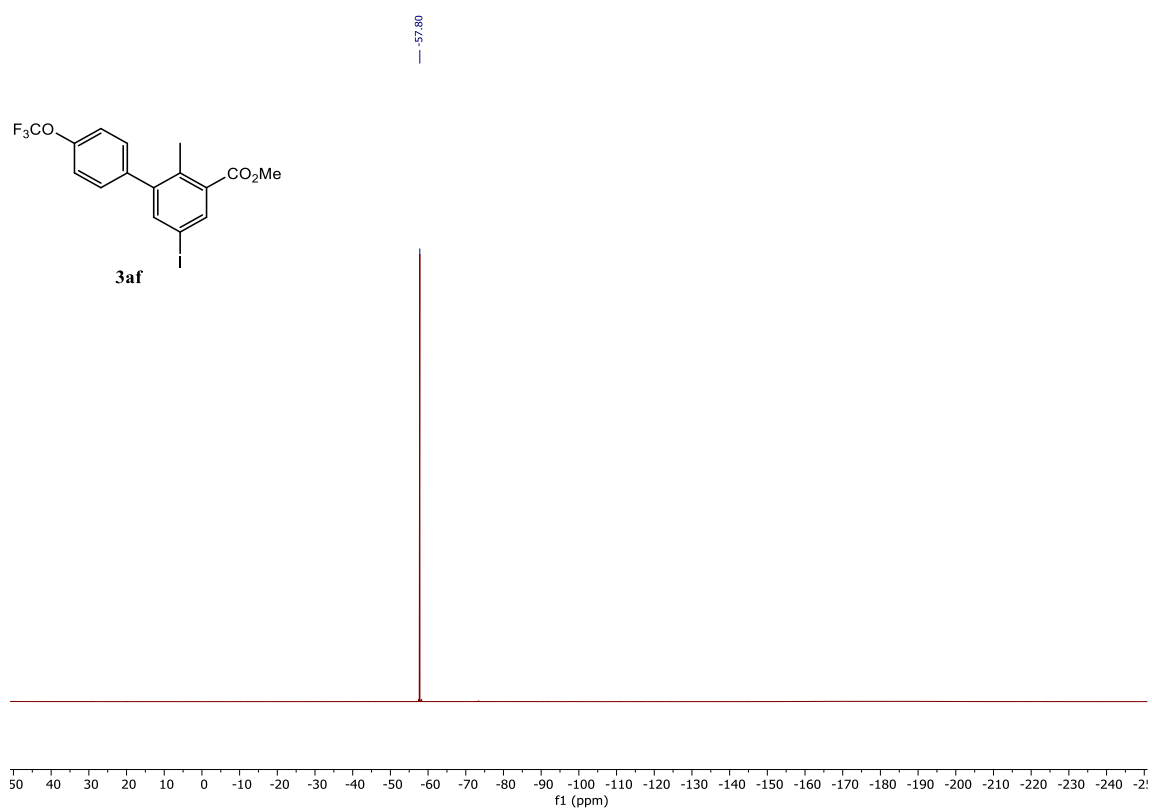



**methyl 2-(2-fluoro-3'-iodo-[1,1'-biphenyl]-4-yl)propanoate (3ag-meta) and methyl 2-(2-fluoro-4'-iodo-[1,1'-biphenyl]-4-yl)propanoate (3ag-para)**

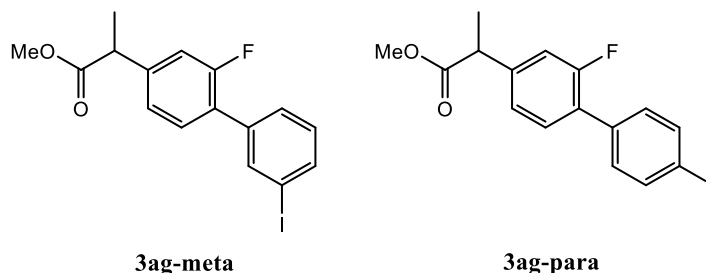

Following the general procedure B, using 1-iodo-2-nitrobenzene (**2**) (150 mg, 0.600 mmol, 3.0 equiv.), methyl 2-(2-fluoro-[1,1'-biphenyl]-4-yl)propanoate (**1ag**) (51.7 mg, 0.200 mmol), and purification via silica column chromatography using pentane:CH<sub>2</sub>Cl<sub>2</sub> = 2:1 as the eluent, the target compound **3ag** was obtained as a colorless oil (36.9 mg, 48%, m:p = 69:31).

**<sup>1</sup>H NMR (CDCl<sub>3</sub>, 600 MHz):**  $\delta$  = 7.88 (s, 1H<sup>m</sup>), 7.78-7.75 (m, 2H<sup>p</sup>), 7.71-7.68 (m, 1H<sup>m</sup>), 7.51-7.48 (m, 1H<sup>m</sup>), 7.37-7.33 (m, 1H<sup>m</sup>+1H<sup>p</sup>), 7.28-7.25 (m, 2H<sup>p</sup>), 7.19-7.09 (m, 3H<sup>m</sup>+2H<sup>p</sup>), 3.76 (q,  $J$  = 7.2 Hz, 1H<sup>m</sup>+1H<sup>p</sup>), 3.70 (s, 3H<sup>m</sup>+3H<sup>p</sup>), 1.53 (d,  $J$  = 7.2 Hz, 3H<sup>m</sup>+3H<sup>p</sup>) ppm.

**<sup>13</sup>C NMR (CDCl<sub>3</sub>, 100 MHz):**  $\delta$  = 174.5, 174.4, 159.6(8) (d,  $J$  = 249.0 Hz), 159.6(7) (d,  $J$  = 248.8 Hz), 142.7 (d,  $J$  = 7.7 Hz), 142.5 (d,  $J$  = 7.8 Hz), 137.9 (d,  $J$  = 2.9 Hz), 137.7(4), 137.7(2) (d,  $J$  = 1.2 Hz), 136.8, 130.9 (d,  $J$  = 3.1 Hz), 130.8 (d,  $J$  = 3.7 Hz), 130.6 (d,  $J$  = 3.7 Hz), 130.2, 129.1 (d,  $J$  = 2.9 Hz), 128.3 (d,  $J$  = 3.1 Hz), 126.9 (d,  $J$  = 13.4 Hz), 126.4 (d,  $J$  = 13.5 Hz), 123.8(3) (d,  $J$  = 3.4 Hz), 123.8(0) (d,  $J$  = 3.4 Hz), 115.5(3) (d,  $J$  = 23.5 Hz), 115.4(9) (d,  $J$  = 23.5 Hz), 94.4, 93.7, 52.4, 45.0(8), 45.0(7), 18.5 ppm.

**<sup>19</sup>F NMR (CDCl<sub>3</sub>, 564 MHz):**  $\delta$  = -117.3, -117.4 ppm.

**HRMS (ESI pos) m/z:** Calcd for C<sub>16</sub>H<sub>14</sub>O<sub>2</sub>FINa<sup>+</sup> 406.9915, Found 406.9914.

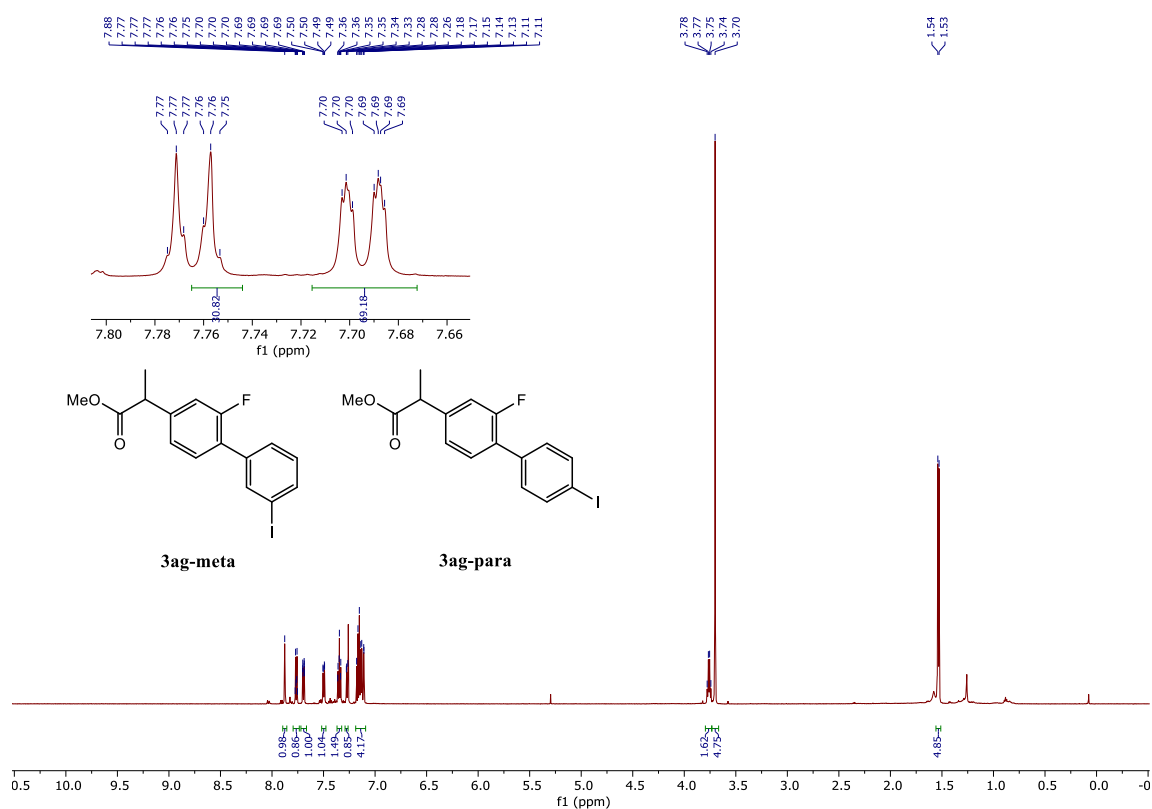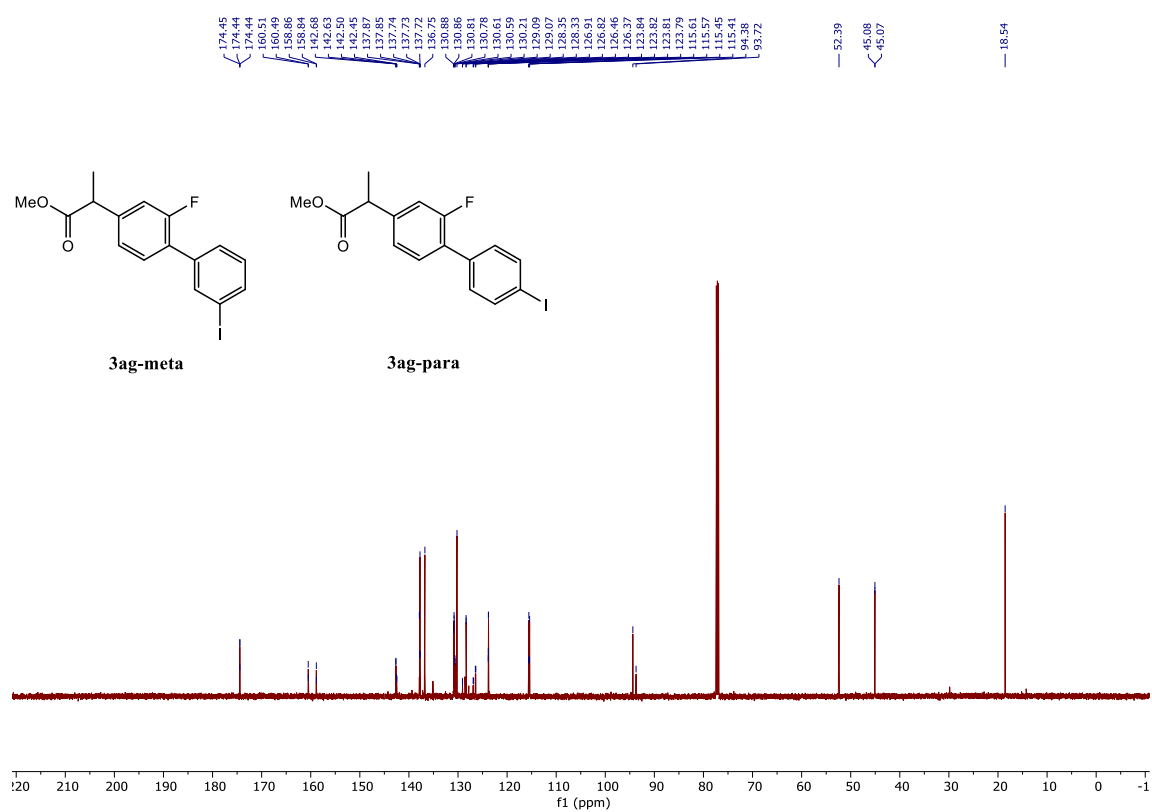

**$^{19}\text{F}$  NMR spectrum in  $\text{CDCl}_3$ :**

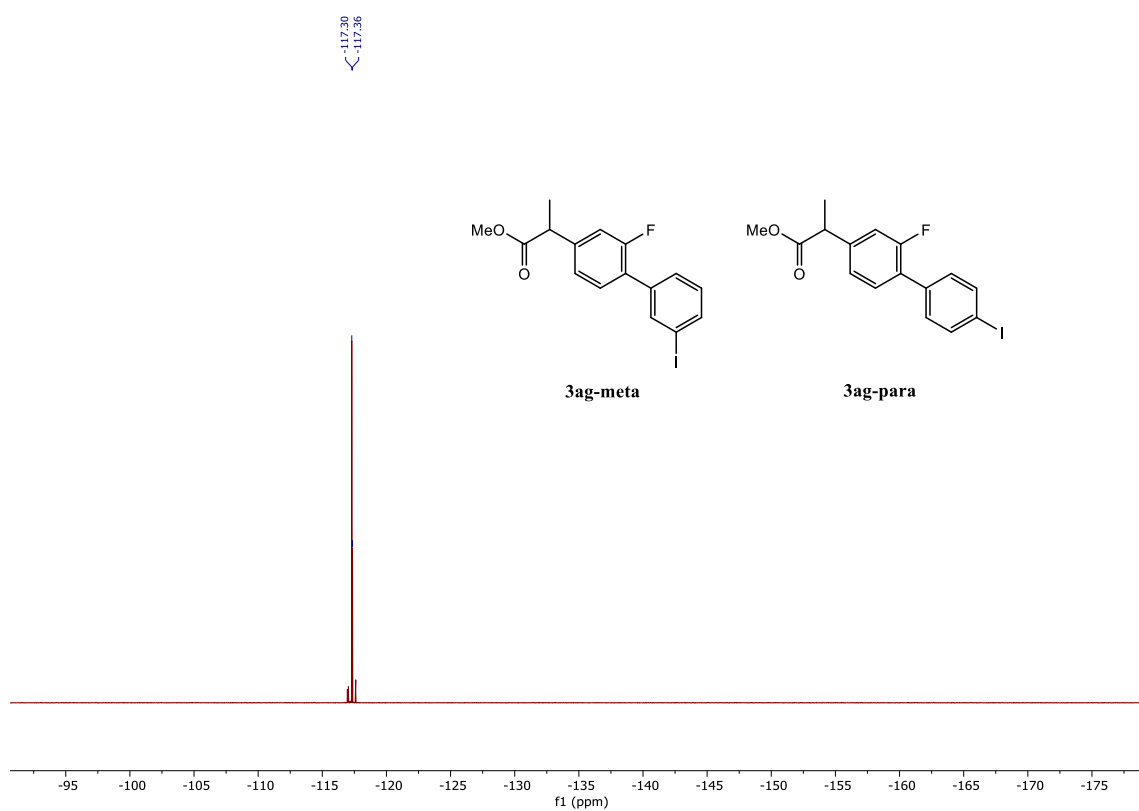

**methyl 3-iodo-5,6,7,8-tetrahydronaphthalene-1-carboxylate (3ah)**

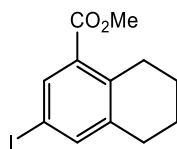

Following the general procedure B, using 1-iodo-2-nitrobenzene (**2**) (150 mg, 0.600 mmol, 3.0 equiv.), methyl 5,6,7,8-tetrahydronaphthalene-1-carboxylate (**1ah**) (38.0 mg, 0.200 mmol), and purification via silica column chromatography using pentane:CH<sub>2</sub>Cl<sub>2</sub> = 1:4 as the eluent, the target compound **3ah** was obtained as a colorless liquid (20.2 mg, 32%).

**<sup>1</sup>H NMR (CDCl<sub>3</sub>, 400 MHz):**  $\delta$  = 7.95 (d,  $J$  = 1.8 Hz, 1H), 7.55 (d,  $J$  = 1.8 Hz, 1H), 3.86 (s, 3H), 2.98 (t,  $J$  = 5.7 Hz, 2H), 2.76 (t,  $J$  = 5.7 Hz, 2H), 1.84-1.66 (m, 4H) ppm.

**<sup>13</sup>C NMR (CDCl<sub>3</sub>, 100 MHz):**  $\delta$  = 167.1, 141.6, 141.1, 138.5, 136.5, 132.2, 89.7, 52.2, 30.0, 27.6, 22.9, 22.3 ppm.

**HRMS (ESI pos) m/z:** Calcd for C<sub>12</sub>H<sub>13</sub>O<sub>2</sub>INa<sup>+</sup> 338.9852, Found 338.9854.

**IR (cm<sup>-1</sup>):** 2933, 1723, 1559, 1456, 1433, 1274, 1256, 1193, 1148, 1021, 819, 778, 556.

**$^1\text{H}$  NMR spectrum in  $\text{CDCl}_3$ :**

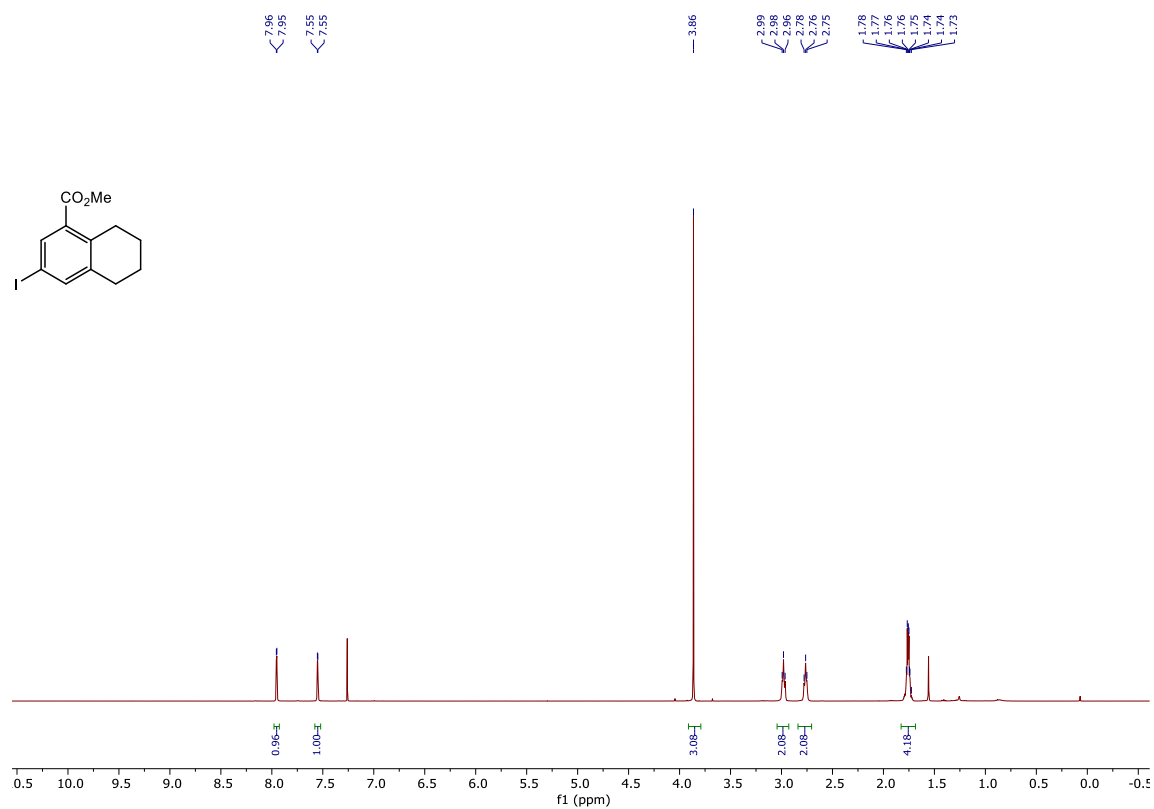

**$^{13}\text{C}$  NMR spectrum in  $\text{CDCl}_3$ :**

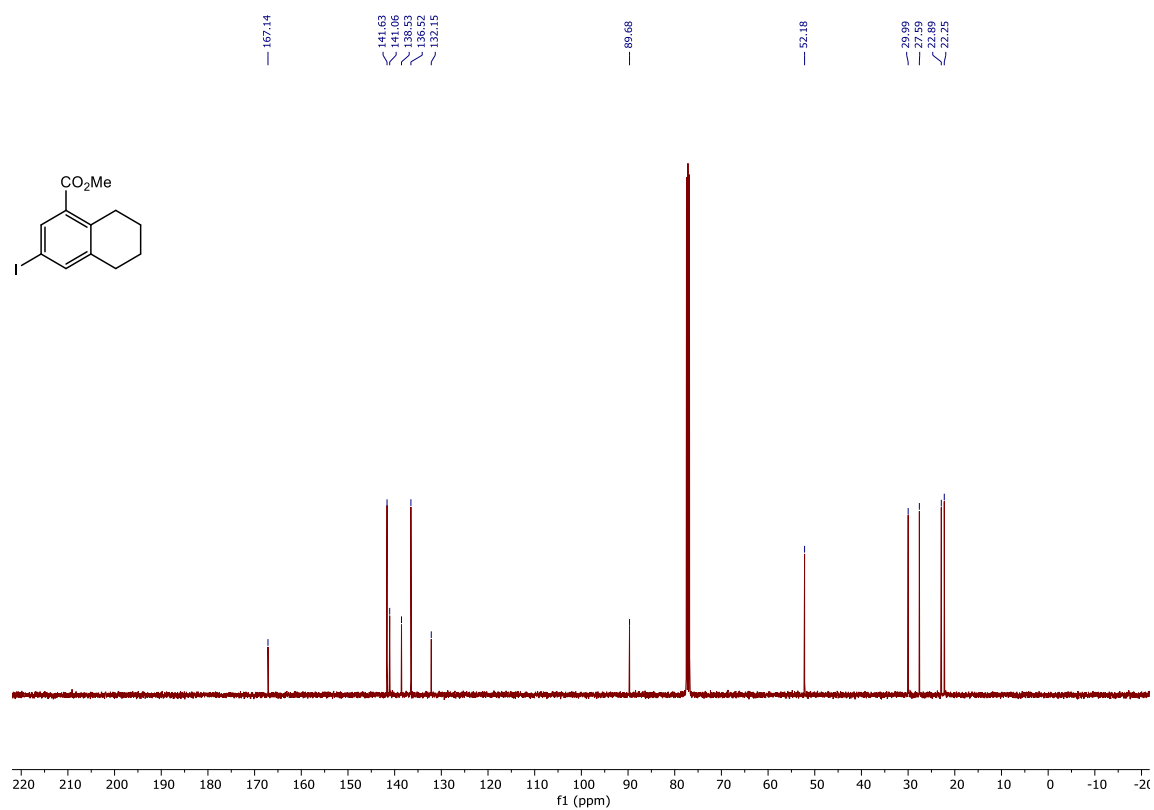

**4-(3-iodobenzyl)-3-propionyloxazolidin-2-one (3ai-meta) and 4-(4-iodobenzyl)-3-propionyloxazolidin-2-one (3ai-para)**

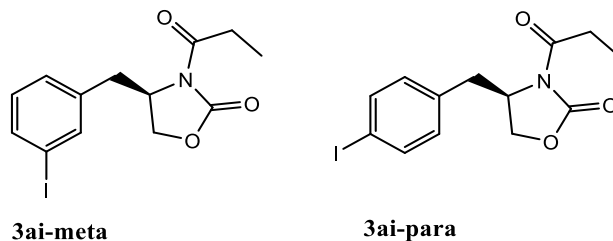

Following the general procedure B<sup>[a]</sup>, using 1-iodo-2-nitrobenzene (**2**) (100 mg, 0.400 mmol, 2.0 equiv.), 4-benzyl-3-propionyloxazolidin-2-one (**1ai**) (46.7 mg, 0.200 mmol), and purification via silica column chromatography using pentane:EtOAc = 4:1 as the eluent, the target compound **3ai** was obtained as a colorless oil (30.3 mg, 42%, m:p = 65:35).

**<sup>1</sup>H NMR (CDCl<sub>3</sub>, 400 MHz):**  $\delta$  = 7.68-7.64 (m, 2H<sup>p</sup>), 7.61 (dt,  $J$  = 7.8, 1.2 Hz, 1H<sup>m</sup>), 7.58 (s, 1H<sup>m</sup>), 7.18 (d,  $J$  = 7.8 Hz, 1H<sup>m</sup>), 7.07 (t,  $J$  = 7.8 Hz, 1H<sup>m</sup>), 6.99-6.93 (m, 2H<sup>p</sup>), 4.68-4.59 (m, 1H<sup>m</sup>+1H<sup>p</sup>), 4.26-4.18 (m, 1H<sup>m</sup>+1H<sup>p</sup>), 4.16-4.09 (m, 1H<sup>m</sup>+1H<sup>p</sup>), 3.28-3.20 (m, 1H<sup>m</sup>+1H<sup>p</sup>), 3.05-2.85 (m, 2H<sup>m</sup>+2H<sup>p</sup>), 2.77-2.67 (m, 1H<sup>m</sup>+1H<sup>p</sup>), 1.24-1.17 (m, 3H<sup>m</sup>+3H<sup>p</sup>) ppm.

**<sup>13</sup>C NMR (CDCl<sub>3</sub>, 100 MHz):**  $\delta$  = 174.2(3), 174.2(1), 153.5, 153.4, 138.5, 138.2, 137.9, 136.6, 135.1, 131.5, 130.8, 128.7, 95.0, 93.0, 66.2(9), 66.2(5), 55.1(0), 55.0(5), 37.6(3), 37.6(0), 29.3(2), 29.3(1), 8.4(3), 8.4(1) ppm.

**HRMS (ESI pos) m/z:** Calcd for C<sub>13</sub>H<sub>14</sub>NO<sub>3</sub>INa<sup>+</sup> 381.9911, Found 381.9908.

[a] Reaction was performed at 70 °C and 48 h reaction time.

# <sup>1</sup>H NMR spectrum in CDCl<sub>3</sub>:

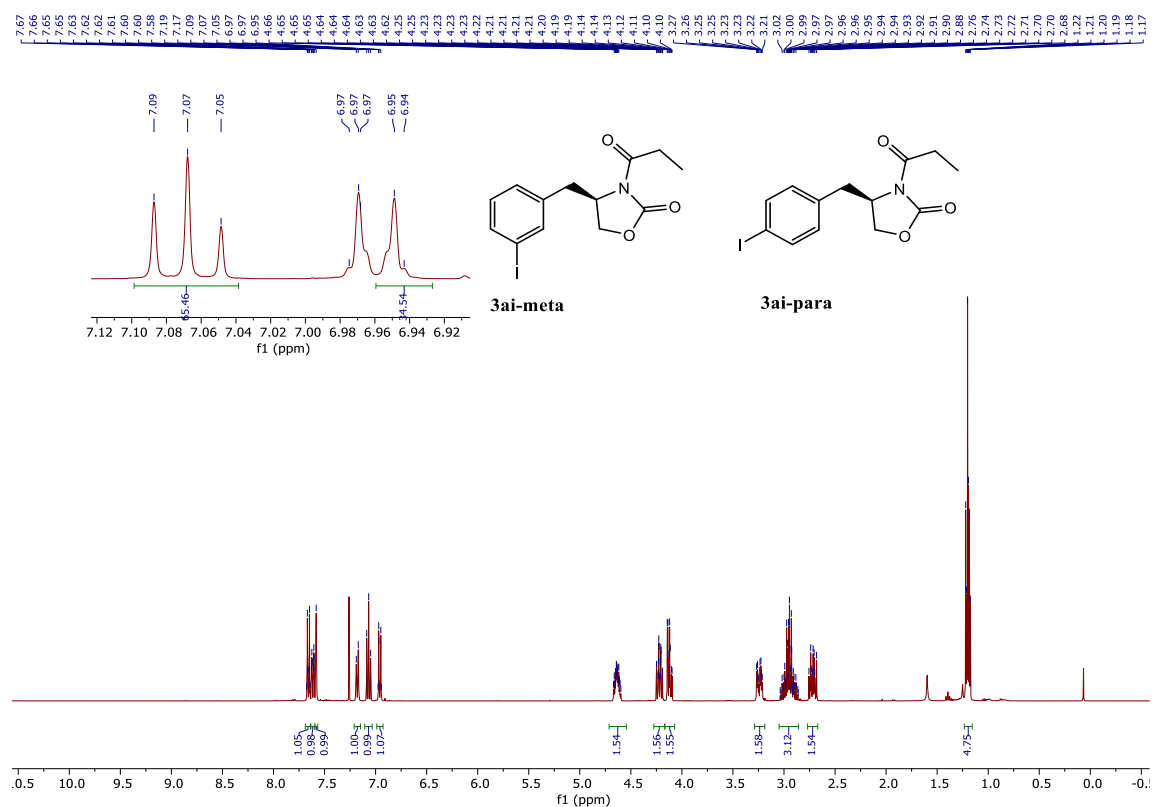

# <sup>13</sup>C NMR spectrum in CDCl<sub>3</sub>:

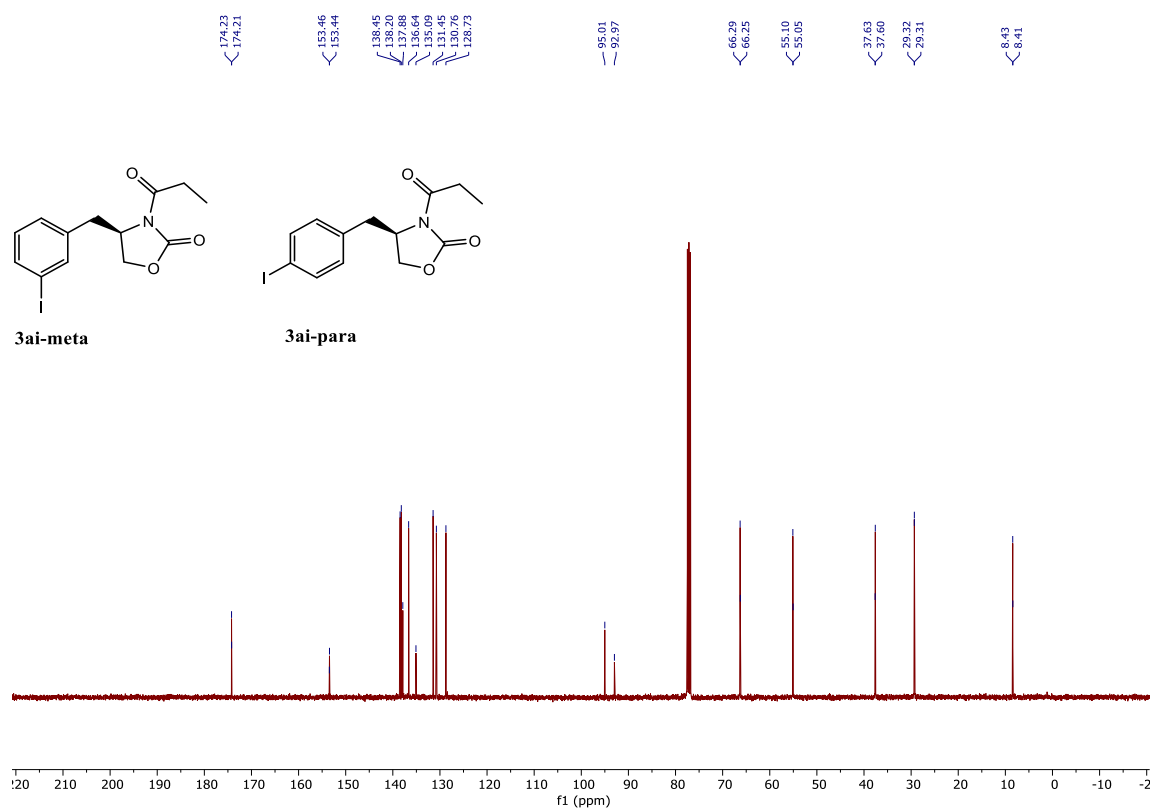

**methyl (*R*)-2-(1,3-dioxoisindolin-2-yl)-3-(3-iodophenyl)propanoate (**3aj-meta**) methyl (*R*)-2-(1,3-dioxoisindolin-2-yl)-3-(4-iodophenyl)propanoate (**3aj-para**)**

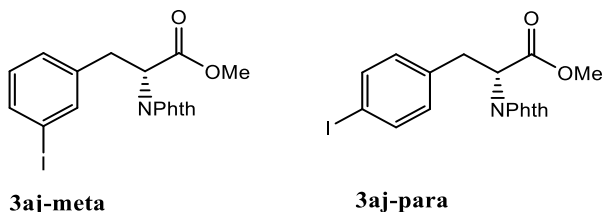

Following the general procedure B<sup>[a]</sup>, using 1-iodo-2-nitrobenzene (**2**) (100 mg, 0.400 mmol, 2.0 equiv.), methyl (*R*)-2-(1,3-dioxoisindolin-2-yl)-3-phenylpropanoate (**1aj**) (61.9 mg, 0.200 mmol), and purification via silica column chromatography using pentane:CH<sub>2</sub>Cl<sub>2</sub> = 1:4 as the eluent, the target compound **3aj** was obtained as a colorless oil (39.2 mg, 45%, m:p =64:36).

**<sup>1</sup>H NMR (CDCl<sub>3</sub>, 400 MHz):**  $\delta$  = 7.84-7.77 (m, 2H<sup>m</sup>+2H<sup>p</sup>), 7.74-7.68 (m, 2H<sup>m</sup>+2H<sup>p</sup>), 7.53-7.49 (m, 1H<sup>m</sup>+2H<sup>p</sup>), 7.47 (d, *J* = 7.8 Hz, 1H<sup>m</sup>), 7.14 (d, *J* = 7.8, 1H<sup>m</sup>), 6.96-6.89 (m, 1H<sup>m</sup>+2H<sup>p</sup>), 5.16-5.07 (m, 1H<sup>m</sup>+1H<sup>p</sup>), 3.79-3.74 (m, 3H<sup>m</sup>+3H<sup>p</sup>), 3.60-3.41 (m, 2H<sup>m</sup>+2H<sup>p</sup>) ppm.

**<sup>13</sup>C NMR (CDCl<sub>3</sub>, 100 MHz):**  $\delta$  = 169.2(2), 169.1(5), 167.6, 167.5, 139.3, 138.1, 137.8, 136.5, 136.2, 134.4, 131.7, 131.6, 131.0, 130.4, 128.2, 123.7, 94.5, 92.5, 53.1(1), 53.0(7), 53.0, 34.4, 34.3 ppm.

**HRMS (ESI pos) m/z:** Calcd for C<sub>18</sub>H<sub>14</sub>NO<sub>4</sub>INa<sup>+</sup> 457.9860, Found 457.9853.

[a] Reaction was performed at 70 °C and 48 h reaction time.



The figure displays the chemical structures of two diastereomers, 3aj-meta and 3aj-para, and their corresponding <sup>1</sup>H NMR spectrum in CDCl<sub>3</sub>.

**Chemical Structures:**

- 3aj-meta:** A chiral molecule with a (1S,2S)-1-((4-iodophenyl)methyl)-2-phenylpropan-1-ol derivative. It features a central chiral carbon bonded to a phenylthio group (NPhth), a methoxycarbonyl group (OMe), and a (4-iodophenyl)methyl group.
- 3aj-para:** A chiral molecule with a (1S,2S)-1-((4-iodophenyl)methyl)-2-phenylpropan-1-ol derivative. It features a central chiral carbon bonded to a phenylthio group (NPhth), a methoxycarbonyl group (OMe), and a (4-iodophenyl)methyl group.

**<sup>1</sup>H NMR Spectrum (CDCl<sub>3</sub>):**

The spectrum shows the following peaks (ppm) and integrations:

- 7.87, 7.81, 7.80, 7.79, 7.78, 7.76, 7.73, 7.72, 7.72, 7.72, 7.71, 7.71, 7.70, 7.70, 7.52, 7.51, 7.51, 7.50, 7.49, 7.48, 7.46, 7.13, 6.95, 6.93, 6.91 (Aromatic region, integration: 3.17, 2.17, 2.15, 1.01, 1.00, 2.14)
- 5.14, 5.11, 5.11, 5.10, 5.09, 5.08 (Aromatic region, integration: 1.56)
- 3.77, 3.77, 3.76, 3.58, 3.57, 3.56, 3.53, 3.53, 3.49, 3.49, 3.46, 3.45, 3.42 (Methoxy region, integration: 4.76, 3.23)

**3aj-meta**

**3aj-para**

169.22  
169.15  
167.56  
167.53

139.28  
138.09  
137.78  
136.72  
136.11  
134.37  
131.65  
131.64  
130.98  
130.96  
128.18  
123.73

94.52  
92.49

53.11  
53.07  
52.99

34.39  
34.34

f1 (ppm)

**methyl (*R*)-3-(2-iodophenyl)-2-((1*r*,4*R*)-4-isopropylcyclohexane-1-carboxamido)propanoate (3ak-ortho), methyl (*R*)-3-(3-iodophenyl)-2-((1*r*,4*R*)-4-isopropylcyclohexane-1-carboxamido)propanoate (3ak-meta) and methyl (*R*)-3-(4-iodophenyl)-2-((1*r*,4*R*)-4-isopropylcyclohexane-1-carboxamido)propanoate (3ak-para)**

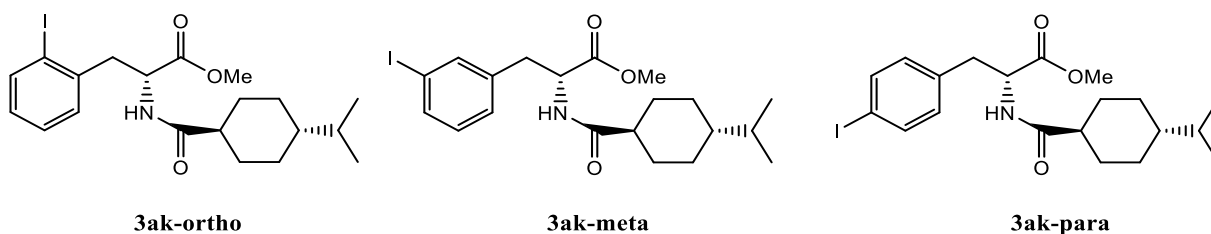

Following the general procedure B<sup>[a]</sup>, using 1-iodo-2-nitrobenzene (**2**) (100 mg, 0.400 mmol, 2.0 equiv.), methyl ((1*r*,4*R*)-4-isopropylcyclohexane-1-carbonyl)-D-phenylalaninate (**1ak**) (66.3 mg, 0.200 mmol), and purification via silica column chromatography using pentane:EtOAc = 4:1 as the eluent, the target compound **3ak** was obtained as a colorless solid (37.0 mg, 40%, o:m:p = 7:54:39).

**<sup>1</sup>H NMR (CDCl<sub>3</sub>, 400 MHz):**  $\delta$  = 7.63-7.53 (m, 1H<sup>m</sup>+2H<sup>p</sup>), 7.43 (s, 1H<sup>m</sup>), 7.31-7.20 (m, 2H<sup>o</sup>), 7.10-6.98 (m, 2H<sup>m</sup>+2H<sup>o</sup>), 6.84-6.79 (m, 2H<sup>p</sup>), 5.96-5.85 (m, 1NH<sup>o</sup>+1NH<sup>m</sup>+1NH<sup>p</sup>), 4.92-4.78 (m, 1H<sup>o</sup>+1H<sup>m</sup>+1H<sup>p</sup>), 3.78-3.68 (m, 3H<sup>o</sup>+3H<sup>m</sup>+3H<sup>p</sup>), 3.25-2.95 (m, 2H<sup>o</sup>+2H<sup>m</sup>+2H<sup>p</sup>), 2.09-1.71 (m, 5H<sup>o</sup>+5H<sup>m</sup>+5H<sup>p</sup>), 1.51-1.30 (m, 3H<sup>o</sup>+3H<sup>m</sup>+3H<sup>p</sup>), 1.15-0.90 (m, 3H<sup>o</sup>+3H<sup>m</sup>+3H<sup>p</sup>), 0.89-0.79 (m, 6H<sup>o</sup>+6H<sup>m</sup>+6H<sup>p</sup>) ppm.

**<sup>13</sup>C NMR (CDCl<sub>3</sub>, 100 MHz):**  $\delta$  = 175.7(4), 175.6(9), 172.1, 172.0, 138.7, 138.5, 137.7, 136.2, 135.8, 131.5, 130.3, 129.5, 128.6(4), 128.6(0), 127.2, 94.5, 92.7, 52.8(3), 52.7(9), 52.7, 52.6, 52.5, 52.4, 45.7, 45.6, 43.4, 43.3, 38.0, 37.5, 37.4, 32.9, 30.1, 29.9(4), 29.9(1), 29.6(4), 29.6(1), 29.1(4), 29.1(0), 29.0, 19.9 ppm.

**HRMS (ESI pos) m/z:** Calcd for C<sub>20</sub>H<sub>28</sub>NO<sub>3</sub>INa<sup>+</sup> 480.1006, Found 480.1002.

[a] Reaction was performed at 70 °C and 48 h reaction time.

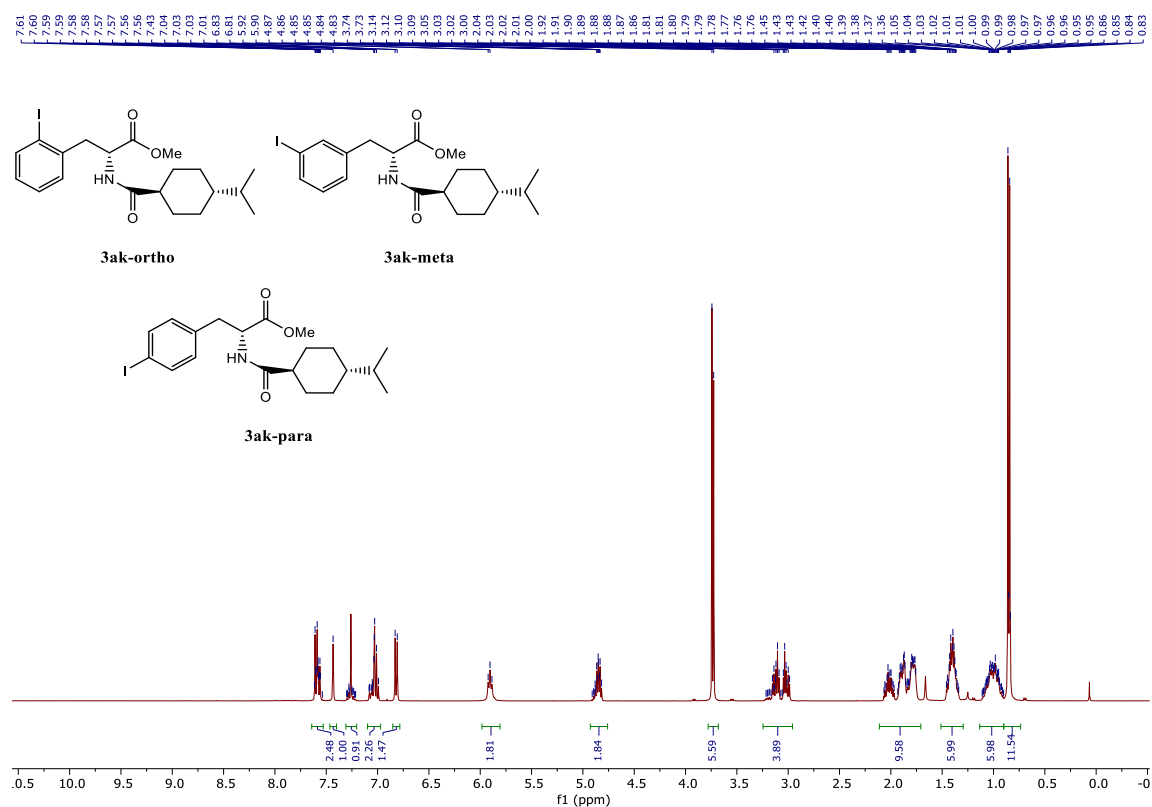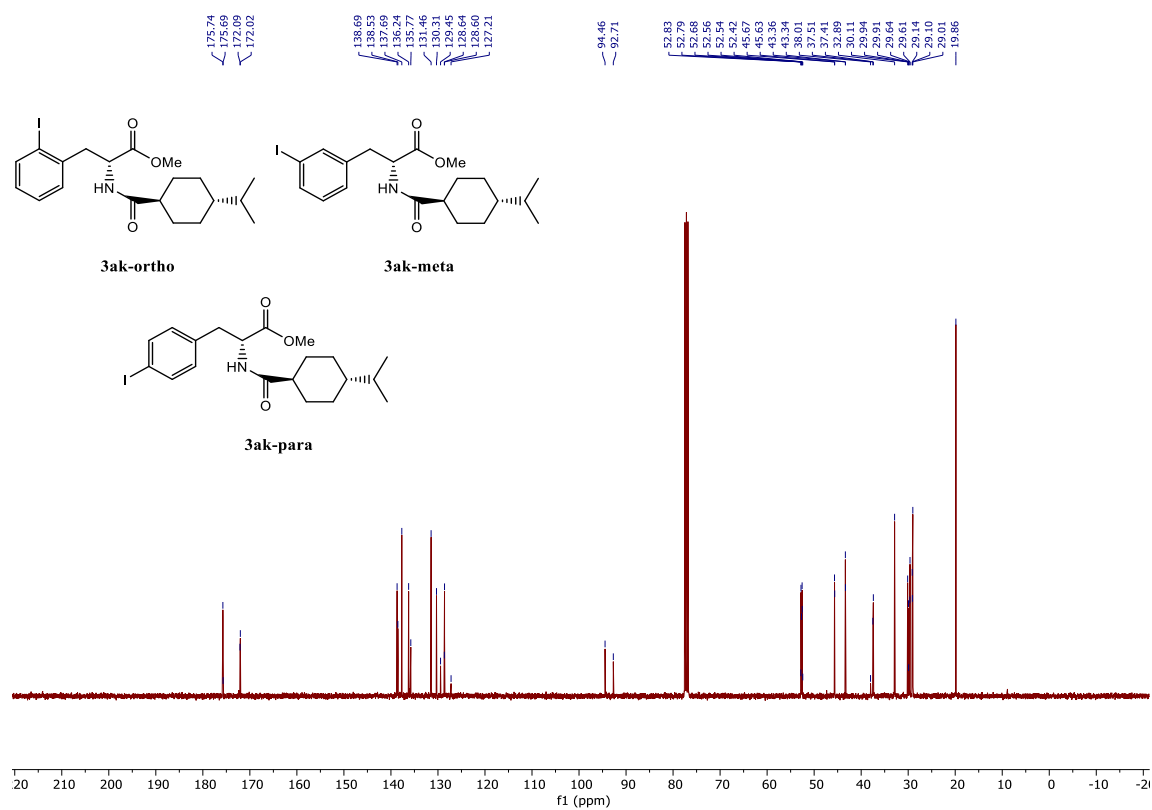

**1-iodo-2-(((1*R*,2*S*,5*R*)-2-isopropyl-5-methylcyclohexyl)oxy)-4-methylbenzene (3al- $\alpha$ ), 1-iodo-3-(((1*R*,2*S*,5*R*)-2-isopropyl-5-methylcyclohexyl)oxy)-5-methylbenzene (3al- $\beta$ ) and 1-iodo-4-(((1*R*,2*S*,5*R*)-2-isopropyl-5-methylcyclohexyl)oxy)-2-methylbenzene (3al- $\gamma$ )**

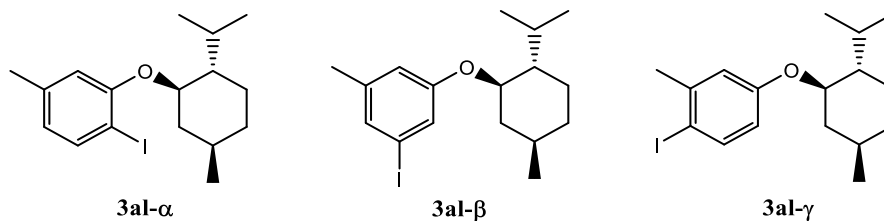

Following the general procedure B, using 1-iodo-2-nitrobenzene (**2**) (150 mg, 0.600 mmol, 3.0 equiv.), 1-(((1*R*,2*S*,5*R*)-2-isopropyl-5-methylcyclohexyl)oxy)-3-methylbenzene (**1al**) (49.3 mg, 0.200 mmol), and purification via silica column chromatography using pentane:CH<sub>2</sub>Cl<sub>2</sub> = 9:1 as the eluent, the target compound **3al** was obtained as a colorless liquid (43.2 mg, 58%,  $\alpha$ : $\beta$ : $\gamma$  = 10:84:6).

**<sup>1</sup>H NMR (CDCl<sub>3</sub>, 400 MHz):**  $\delta$  = 7.61(d,  $J$  = 7.9 Hz, 1H <sup>$\alpha$</sup> ), 7.35 (s, 1H <sup>$\gamma$</sup> ), 7.10 (s, 1H <sup>$\beta$</sup> ), 7.04 (s, 1H <sup>$\beta$</sup> ), 6.81 (d,  $J$  = 2.8 Hz, 1H <sup>$\gamma$</sup> ), 6.66 (s, 1H <sup>$\beta$</sup> ), 6.61 (d,  $J$  = 1.7 Hz, 1H <sup>$\alpha$</sup> ), 6.54-6.44 (m, 1H <sup>$\alpha$</sup> +1H <sup>$\gamma$</sup> ), 4.13-3.89 (m, 1H <sup>$\alpha$</sup> +1H <sup>$\beta$</sup> +1H <sup>$\gamma$</sup> ), 2.38 (s, 3H <sup>$\gamma$</sup> ), 2.31 (s, 3H <sup>$\alpha$</sup> ), 2.26 (s, 3H <sup>$\beta$</sup> ), 2.22-2.05 (m, 2H <sup>$\alpha$</sup> +2H <sup>$\beta$</sup> +2H <sup>$\gamma$</sup> ), 1.80-1.39 (m, 4H <sup>$\alpha$</sup> +4H <sup>$\beta$</sup> +4H <sup>$\gamma$</sup> ), 1.17-0.84 (m, 9H <sup>$\alpha$</sup> +9H <sup>$\beta$</sup> +9H <sup>$\gamma$</sup> ), 0.81-0.73 (m, 3H <sup>$\alpha$</sup> +3H <sup>$\beta$</sup> +3H <sup>$\gamma$</sup> ) ppm.

**<sup>13</sup>C NMR (CDCl<sub>3</sub>, 100 MHz):**  $\delta$  = 159.0, 159.8, 156.8, 142.6, 141.4, 139.7, 139.5, 139.2, 130.5, 123.1, 121.8, 118.0, 116.4, 115.1, 114.1, 94.5, 84.1, 78.9, 77.8, 48.2, 48.0, 47.0, 40.3, 34.6, 31.6, 31.5, 26.3, 26.2, 23.9, 23.7(1), 23.6(5), 22.3, 21.6, 21.2, 21.0(1), 20.9(9), 20.9, 16.8, 16.7(4), 16.6(9) ppm.

**HRMS (EI pos) m/z:** Calcd for C<sub>17</sub>H<sub>25</sub>OI<sup>+</sup> 372.0945, Found 372.0945.

# <sup>1</sup>H NMR spectrum in CDCl<sub>3</sub>:

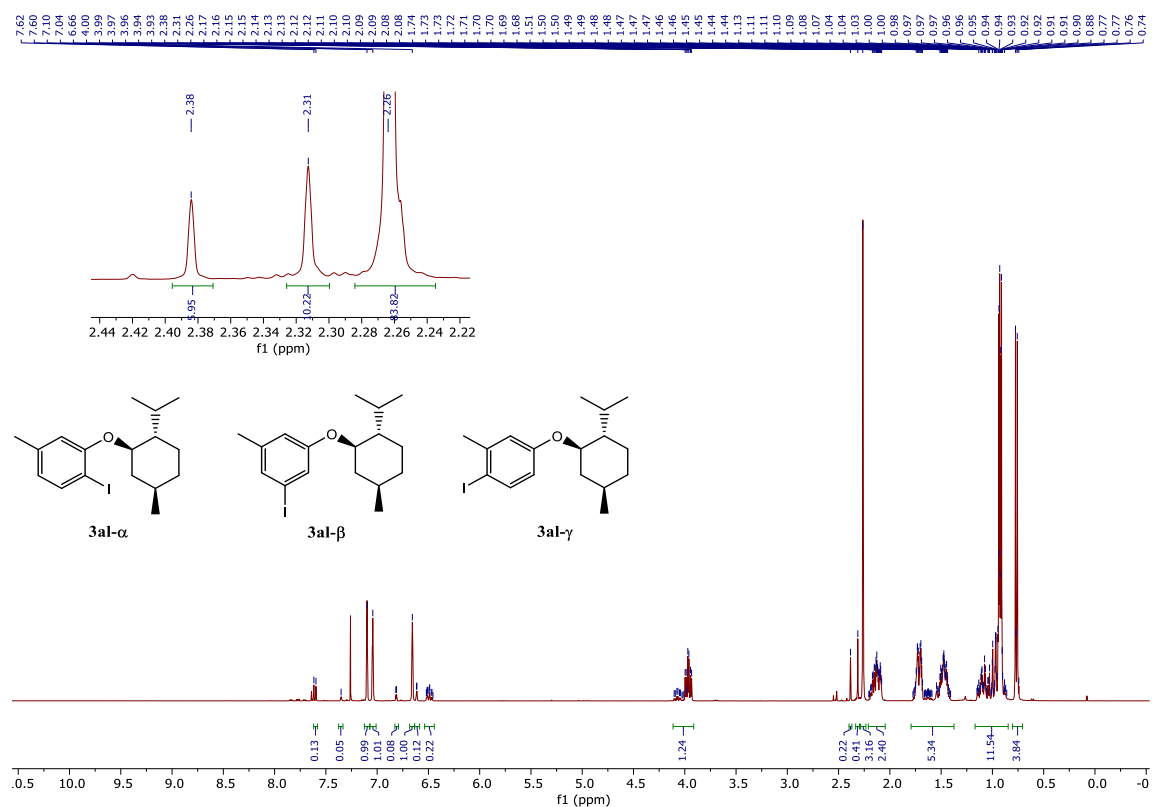

# <sup>13</sup>C NMR spectrum in CDCl<sub>3</sub>:

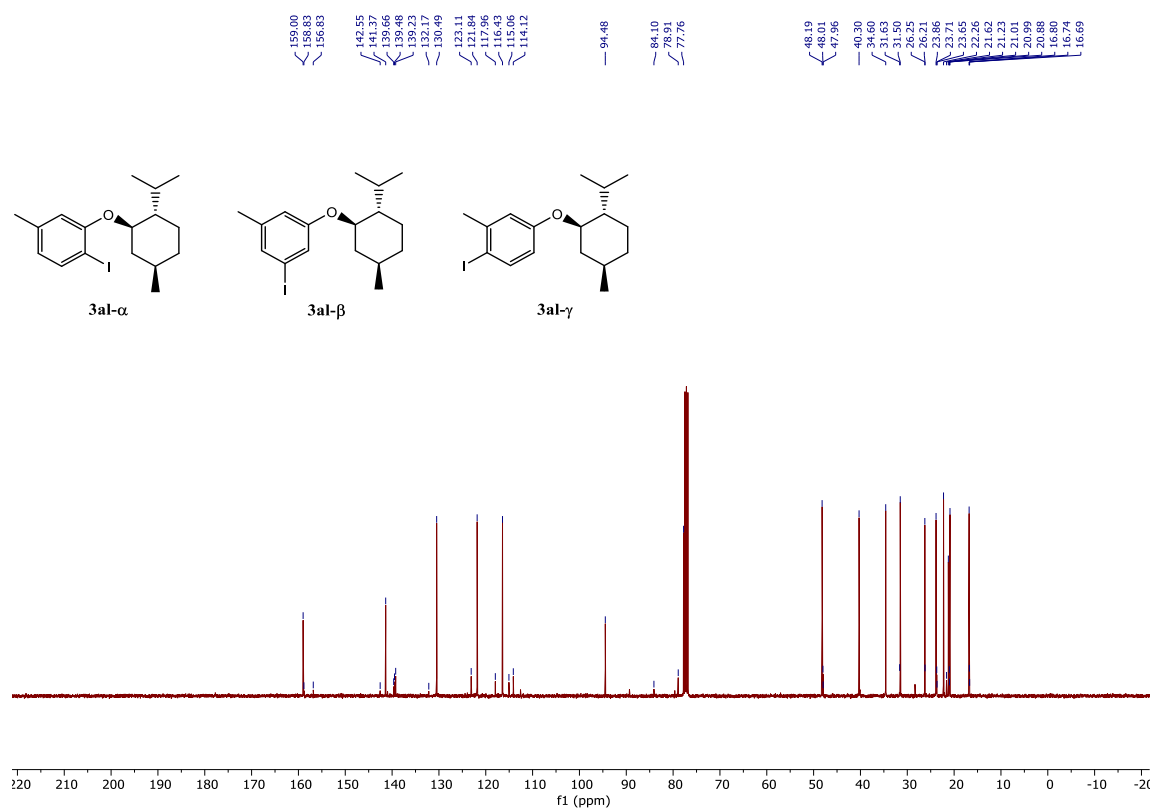

**1-iodo-2-((2-isopropyl-5-methylphenoxy)methyl)-4-methylbenzene (3am- $\alpha$ ), 2-((3-iodo-5-methylbenzyl)oxy)-1-isopropyl-4-methylbenzene (3am- $\beta$ ) and 1-iodo-5-isopropyl-2-methyl-4-((3-methylbenzyl)oxy)benzene (3am- $\alpha'$ )**

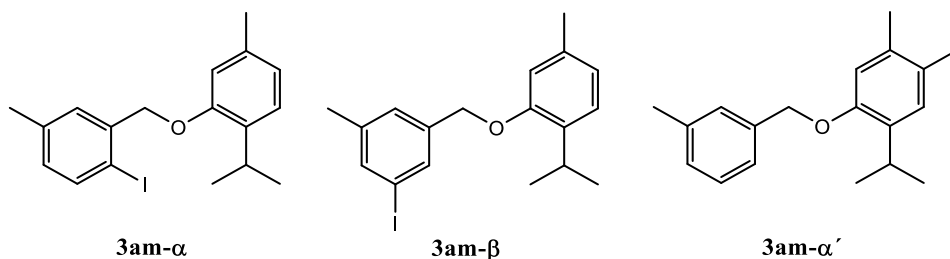

Following the general procedure B, using 1-iodo-2-nitrobenzene (**2**) (150 mg, 0.600 mmol, 3.0 equiv.), 1-isopropyl-4-methyl-2-((3-methylbenzyl)oxy)benzene (**1am**) (50.9 mg, 0.200 mmol), and purification via silica column chromatography using pentane:CH<sub>2</sub>Cl<sub>2</sub> = 9:1 as the eluent, the target compound **3am** was obtained as a colorless oil (30.4 mg, 40%,  $\alpha$ : $\beta$ : $\alpha'$  = 18:75:7).

**<sup>1</sup>H NMR (CDCl<sub>3</sub>, 400 MHz):**  $\delta$  = 7.74 (d,  $J$  = 8.0 Hz, 1H $^{\alpha}$ ), 7.61 (s, 1H $^{\beta}$ ), 7.59-7.56 (m, 2H $^{\alpha'}$ ), 7.51 (s, 1H $^{\beta}$ ), 7.41-7.37 (m, 1H $^{\alpha}$ ), 7.31-7.10 (m, 1H $^{\alpha}$ +2H $^{\beta}$ +3H $^{\alpha'}$ ), 6.87 (d,  $J$  = 8.0, 2.1 Hz, 1H $^{\alpha}$ ), 6.83-6.73 (m, 2H $^{\alpha}$ +1H $^{\beta}$ +1H $^{\alpha'}$ ), 6.71 (s, 1H $^{\beta}$ ), 5.03-4.91 (m, 2H $^{\alpha}$ +2H $^{\beta}$ +2H $^{\alpha'}$ ), 3.49-3.23 (m, 1H $^{\alpha}$ +1H $^{\beta}$ +1H $^{\alpha'}$ ), 2.41-2.29 (m, 6H $^{\alpha}$ +6H $^{\beta}$ +6H $^{\alpha'}$ ), 1.29-1.18 (m, 6H $^{\alpha}$ +6H $^{\beta}$ +6H $^{\alpha'}$ ) ppm.

**<sup>13</sup>C NMR (CDCl<sub>3</sub>, 100 MHz):**  $\delta$  = 155.8, 155.7, 140.5, 139.9, 139.6, 139.1, 138.5, 137.5, 136.6, 136.5, 134.6, 134.5, 133.3, 130.4, 129.6, 127.3, 126.2, 126.1, 121.8(6), 121.8(5), 113.0, 112.9, 94.5, 93.2, 74.2, 69.3, 26.7(3), 26.7(0), 23.1, 23.0, 22.8, 21.5(2), 21.5(0), 21.3, 21.2 ppm.

**HRMS (ESI pos) m/z:** Calcd for C<sub>18</sub>H<sub>21</sub>OINa<sup>+</sup> 403.0529, Found 403.0530.

**$^1\text{H}$  NMR spectrum in  $\text{CDCl}_3$ :**

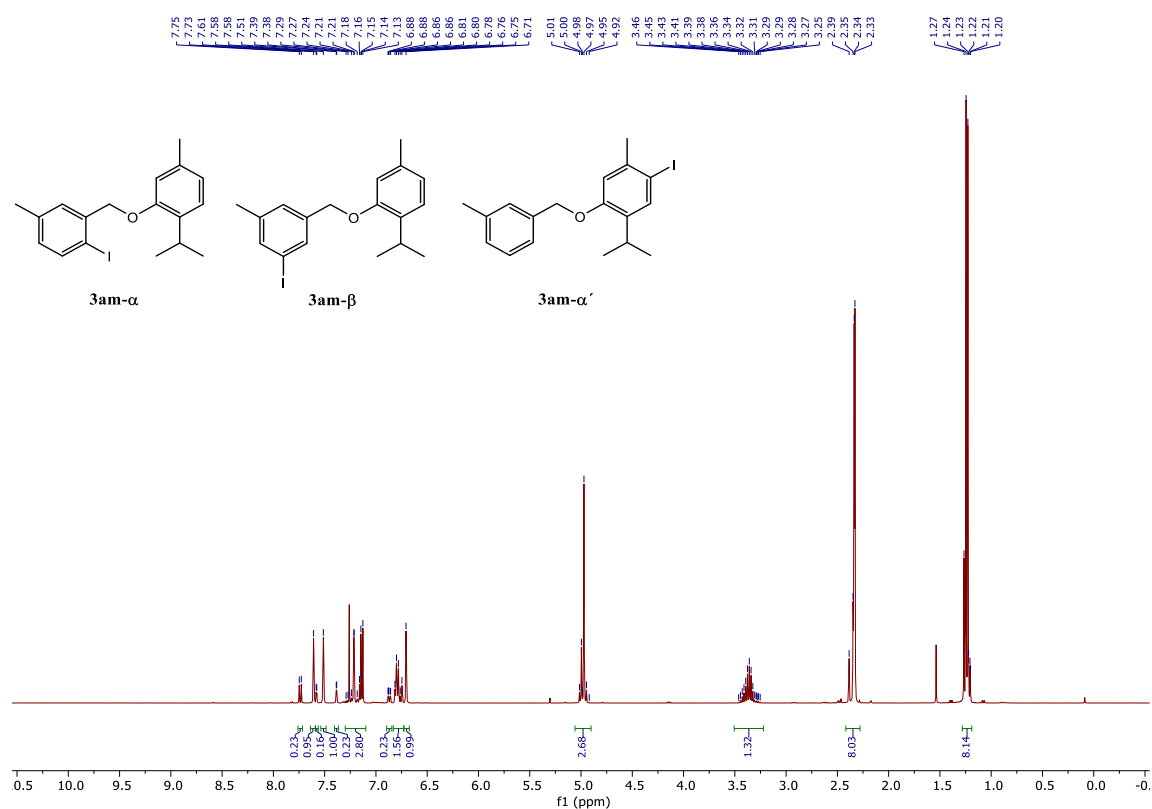

**$^{13}\text{C}$  NMR spectrum in  $\text{CDCl}_3$ :**

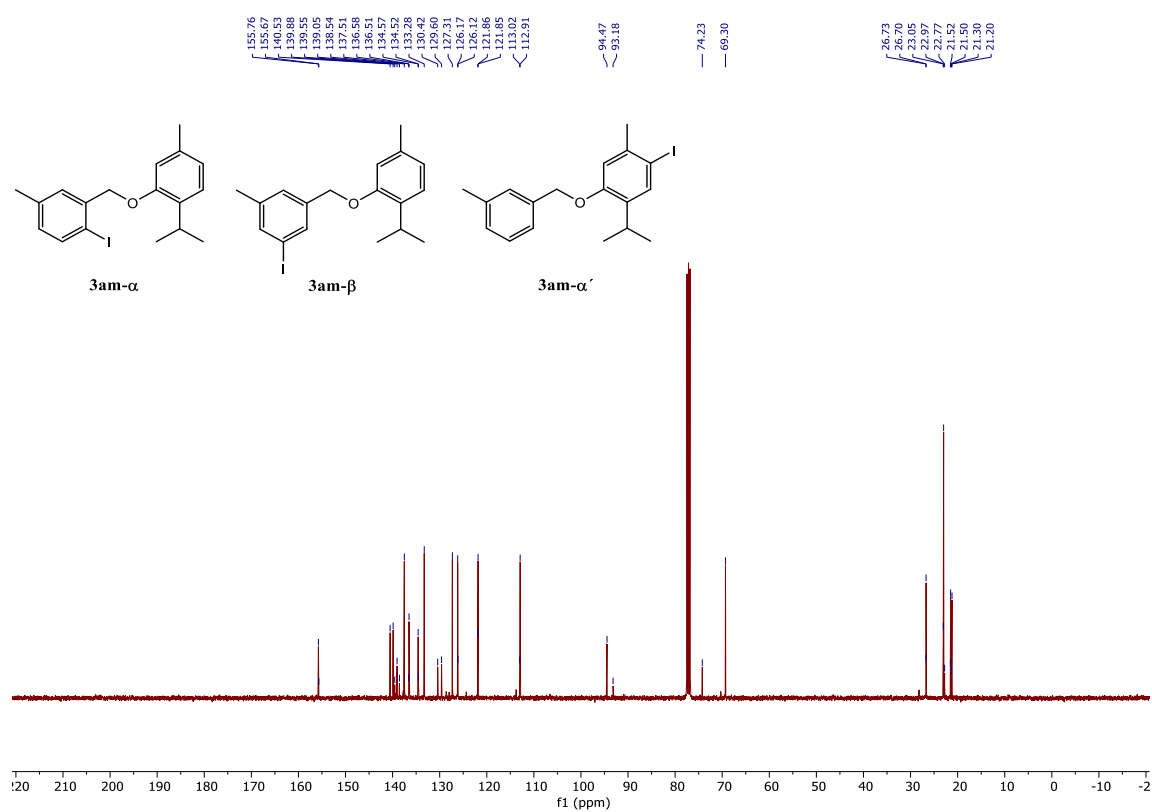

### Scheme S43: Unsuccessful Entries of the C–H Iodination

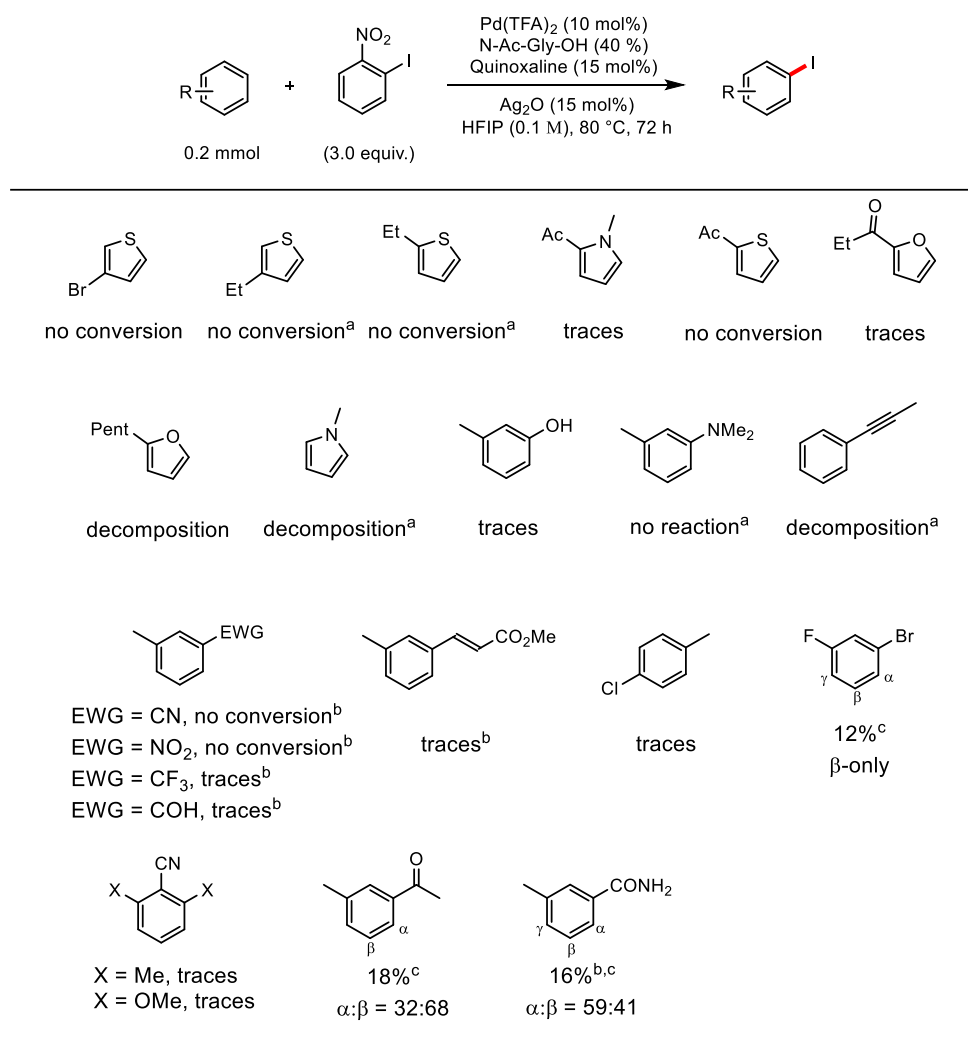

<sup>a</sup>I-Reagent = 2.0 equiv.; 70 °C, 48 h

<sup>b</sup>I-Reagent = 4.0 equiv.; AgNO<sub>3</sub> (30 mol%), 100 °C

<sup>c</sup>Isolated Yield



## 5 Comparison of Isolated Selectivity and Selectivity of Crude Reaction Mixture (Selected Examples)

| Code | Structure                                                                           | Selectivity of Isolated Compound | Selectivity from Crude Reaction Mixture |
|------|-------------------------------------------------------------------------------------|----------------------------------|-----------------------------------------|
| 3a   | 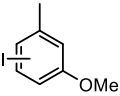   | $\beta$ -only                    | $\alpha:\beta:\gamma = 12:85:3$         |
| 3b   |    | $\beta$ -only                    | $\beta$ -only                           |
| 3c   |    | m:p = 68:32                      | m:p = 69:31                             |
| 3d   |    | m:p = 72:28                      | m:p = 73:27                             |
| 3e   |  | m:p = 82:18                      | m:p = 78:22                             |
| 3f   |  | m:p = 62:38                      | m:p = 59:41                             |
| 3i   |  | $\beta$ -only                    | $\beta$ -only                           |
| 3k   |  | $\beta:\beta' = 38:62$           | $\beta:\beta' = 37:63$                  |
| 3l   |  | $\beta$ -only                    | $\beta$ -only                           |
| 3m   |  | $\beta$ -only                    | $\beta$ -only                           |

| Code | Structure                                                                           | Selectivity of Isolated Compound | Selectivity from Crude Reaction Mixture |
|------|-------------------------------------------------------------------------------------|----------------------------------|-----------------------------------------|
| 3n   | 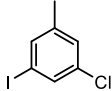   | $\beta$ -only                    | $\beta$ -only                           |
| 3o   |    | $\beta$ -only                    | $\beta$ -only                           |
| 3r   |    | $\alpha:\beta = 20:80$           | $\alpha:\beta = 23:77$                  |
| 3s   |    | $\alpha:\beta = 8:92$            | $\alpha:\beta = 8:92$                   |
| 3t   |   | $\beta$ -only                    | $\beta$ -only                           |
| 3v   |  | $\alpha:\beta = 6:94$            | $\alpha:\beta = 5:95$                   |
| 3w   |  | $\beta$ -only                    | $\beta$ -only                           |
| 3x   |  | $\beta$ -only                    | $\beta$ -only                           |
| 3y   |  | $\beta$ -only                    | $\beta$ -only                           |
| 3ab  |  | $\beta$ -only                    | $\beta$ -only                           |

| Code | Structure | Selectivity of Isolated Compound         | Selectivity from Crude Reaction Mixture  |
|------|-----------|------------------------------------------|------------------------------------------|
| 3ac  |           | $\beta$ -only                            | $\beta$ -only                            |
| 3ag  |           | m:p = 69:31                              | m:p = 68:32                              |
| 3ah  |           | $\beta$ -only                            | $\beta$ -only                            |
| 3al  |           | $\alpha$ : $\beta$ : $\gamma$ = 10:84:6  | $\alpha$ : $\beta$ : $\gamma$ = 4:92:4   |
| 3am  |           | $\alpha$ : $\beta$ : $\alpha'$ = 18:75:7 | $\alpha$ : $\beta$ : $\alpha'$ = 19:79:3 |

A comparison of the regioselectivities resulting from the iodination reaction (crude reaction mixture) and the regioselectivities obtained after isolation of the iodinated product determined by GC-FID analysis confirms that the values are nearly identical to one another. No influence or change has been caused by solely isolating/removing one isomer during the purification procedure leading to falsely good regioselectivities. Hence, the regioselectivities shown for the respective scope entries can be considered direct and intrinsic results produced by the reaction conditions.

## GC-data of selected examples

### Method Information:

#### 1) Standard method

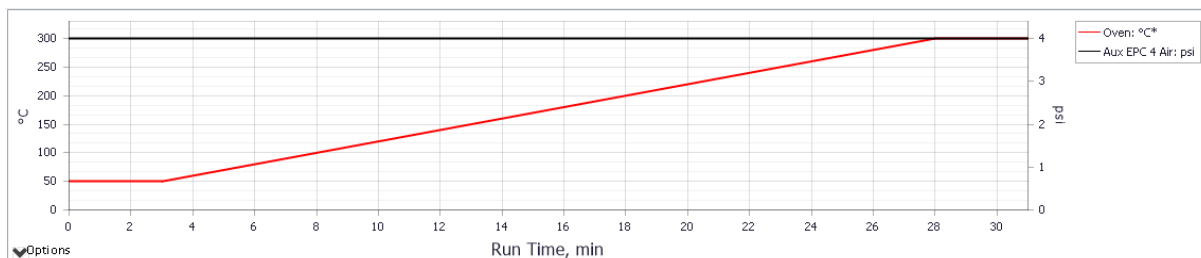

|             | Rate<br>°C/min | Value<br>°C | Hold Time<br>min | Run Time<br>min |
|-------------|----------------|-------------|------------------|-----------------|
| ► (Initial) |                | 50          | 3                | 3               |
| Ramp 1      | 10             | 300         | 3                | 31              |
| •           |                |             |                  |                 |

Post Run: 50 °C

Post Run Time: 0 min

#### 2) Method for separation of compound **3a**

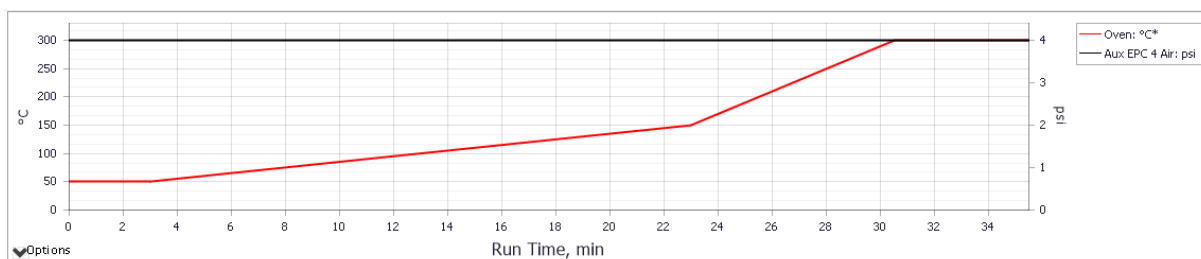

|             | Rate<br>°C/min | Value<br>°C | Hold Time<br>min | Run Time<br>min |
|-------------|----------------|-------------|------------------|-----------------|
| ► (Initial) |                | 50          | 3                | 3               |
| Ramp 1      | 5              | 150         | 0                | 23              |
| Ramp 2      | 20             | 300         | 5                | 35.5            |
| •           |                |             |                  |                 |

Post Run: 50 °C

Post Run Time: 0 min

### 3) Method for separation of compound **3c**

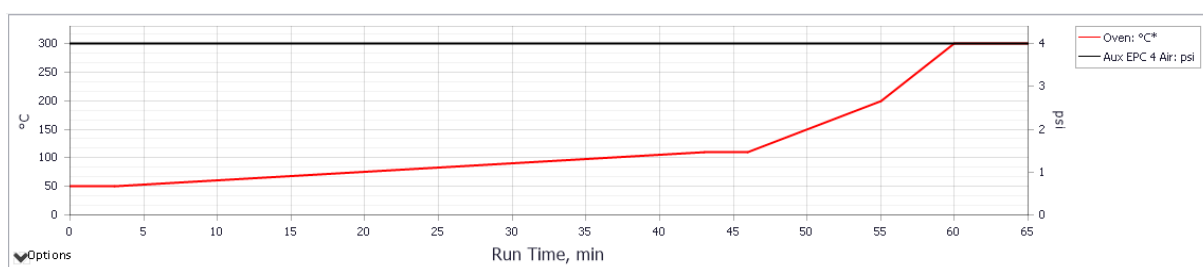

|             | Rate<br>°C/min | Value<br>°C | Hold Time<br>min | Run Time<br>min |
|-------------|----------------|-------------|------------------|-----------------|
| ► (Initial) |                | 50          | 3                | 3               |
| Ramp 1      | 1.5            | 110         | 3                | 46              |
| Ramp 2      | 10             | 200         | 0                | 55              |
| Ramp 3      | 20             | 300         | 5                | 65              |
| •           |                |             |                  |                 |

Post Run: 50 °C

Post Run Time: 0 min

### 4) Method for the separation of compound **3f**

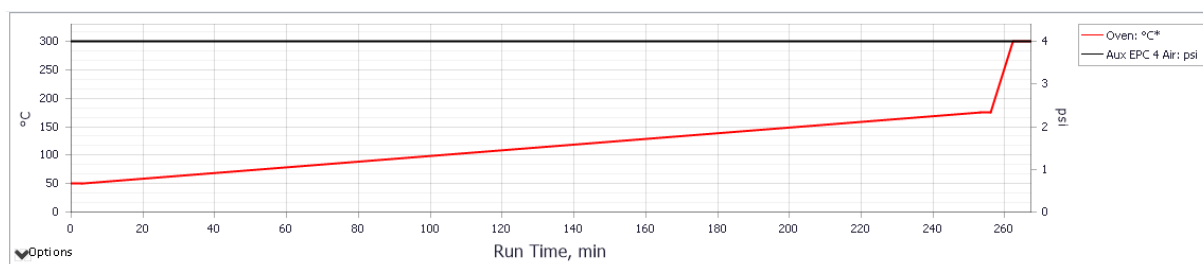

|             | Rate<br>°C/min | Value<br>°C | Hold Time<br>min | Run Time<br>min |
|-------------|----------------|-------------|------------------|-----------------|
| ► (Initial) |                | 50          | 3                | 3               |
| Ramp 1      | 0.5            | 175         | 3                | 256             |
| Ramp 2      | 20             | 300         | 5                | 267.25          |
| •           |                |             |                  |                 |

Post Run: 50 °C

Post Run Time: 0 min

**1-iodo-2-methoxy-4-methylbenzene (3a- $\alpha$ ), 1-iodo-3-methoxy-5-methylbenzene (3a- $\beta$ ) and 1-iodo-4-methoxy-2-methylbenzene (3a- $\gamma$ ): GC-FID trace of crude reaction mixture**

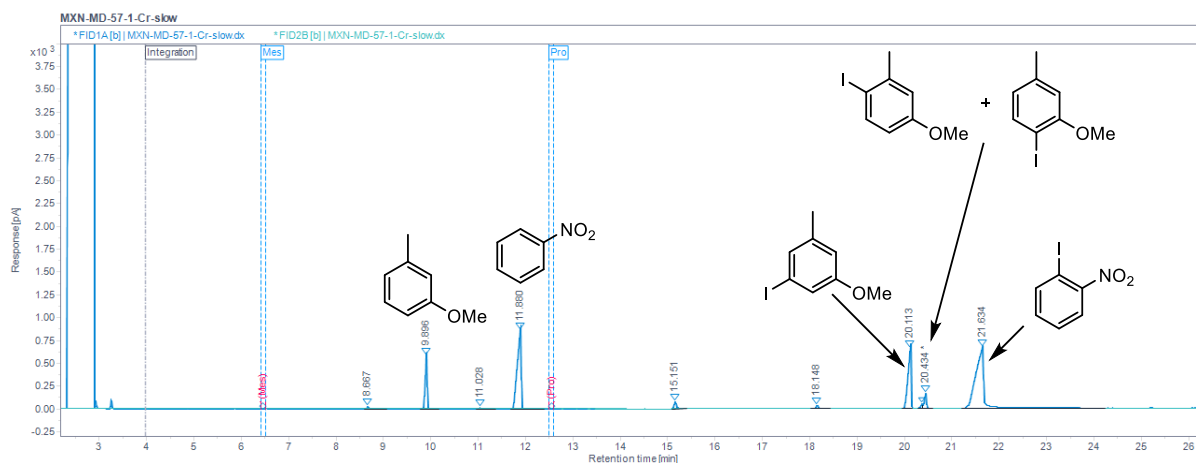

**1-iodo-2-methoxy-4-methylbenzene (3a- $\alpha$ ), 1-iodo-3-methoxy-5-methylbenzene (3a- $\beta$ ) and 1-iodo-4-methoxy-2-methylbenzene (3a- $\gamma$ ): GC-FID trace of crude reaction mixture (close-up)**

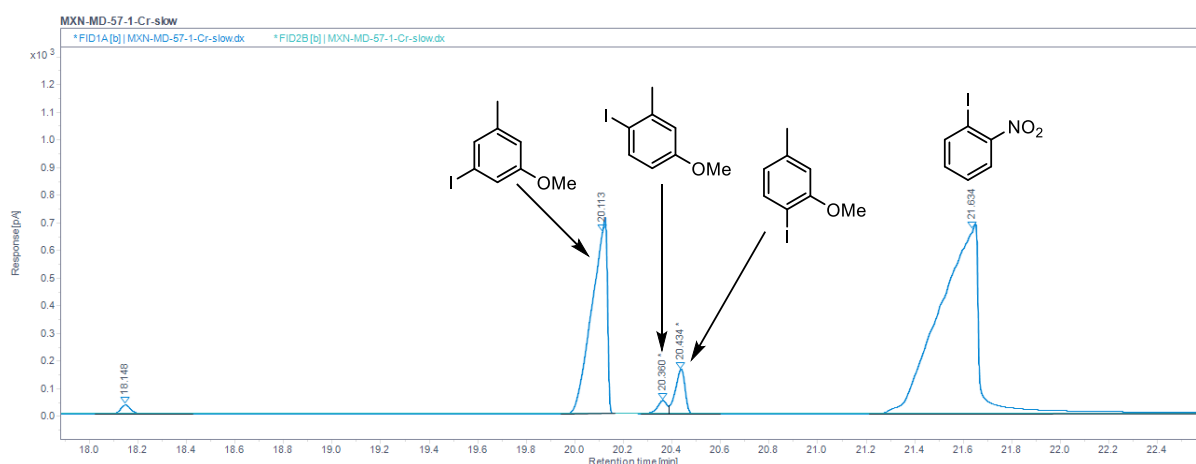

**1-iodo-2-methoxy-4-methylbenzene (3a- $\alpha$ ), 1-iodo-3-methoxy-5-methylbenzene (3a- $\beta$ ) and 1-iodo-4-methoxy-2-methylbenzene (3a- $\gamma$ ): GC-FID trace of isolated compound**

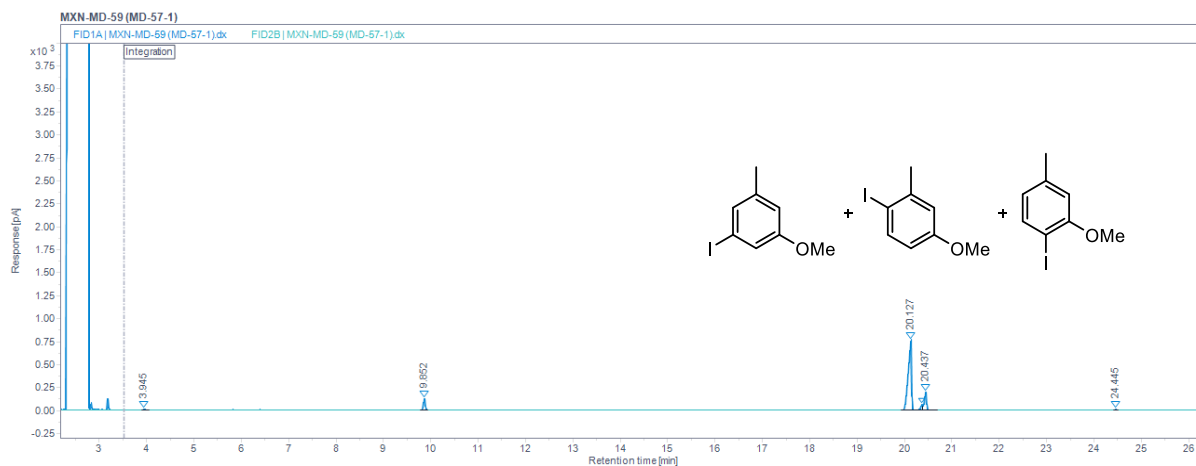

**1-iodo-2-methoxy-4-methylbenzene (3a- $\alpha$ ), 1-iodo-3-methoxy-5-methylbenzene (3a- $\beta$ ) and 1-iodo-4-methoxy-2-methylbenzene (3a- $\gamma$ ): GC-FID trace of isolated compound (close-up)**

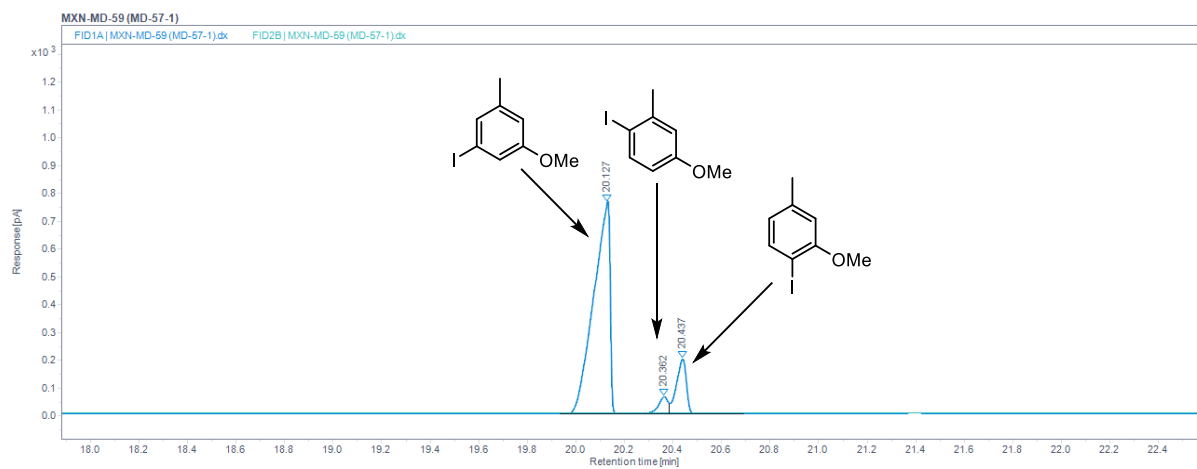

## 2-iodonaphthalene (3b): GC-FID trace of crude reaction mixture

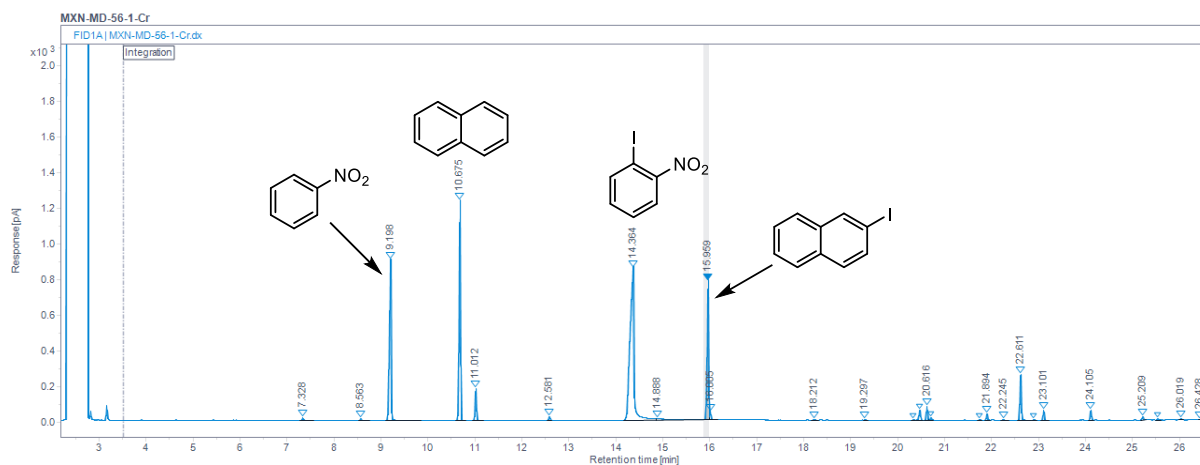

## 2-iodonaphthalene (3b): GC-FID trace of isolated compound

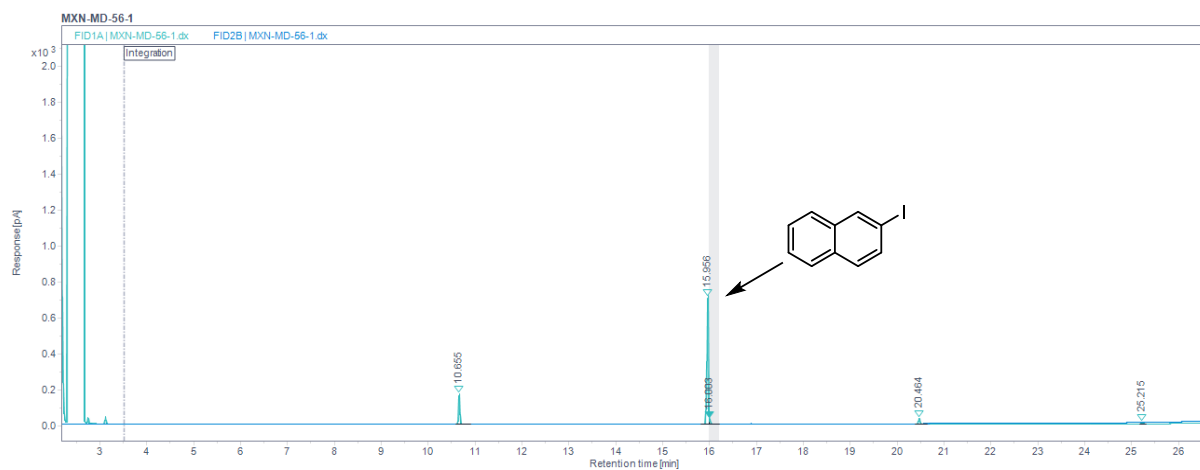



**1-iodo-3-methylbenzene (3c-meta) and 1-iodo-4-methylbenzene (3c-para): GC-FID trace of crude reaction mixture**

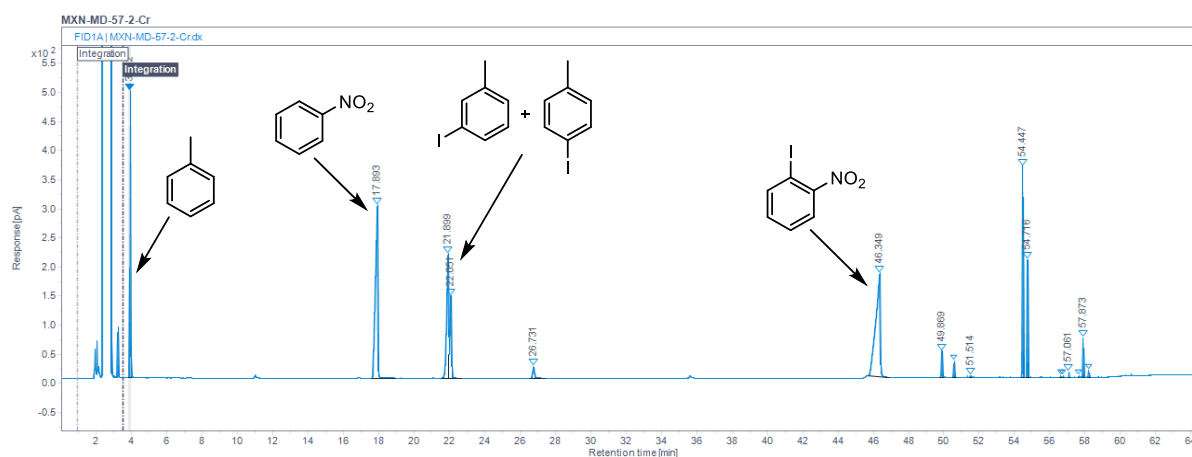

**1-iodo-3-methylbenzene (3c-meta) and 1-iodo-4-methylbenzene (3c-para): GC-FID trace of crude reaction mixture (close-up)**

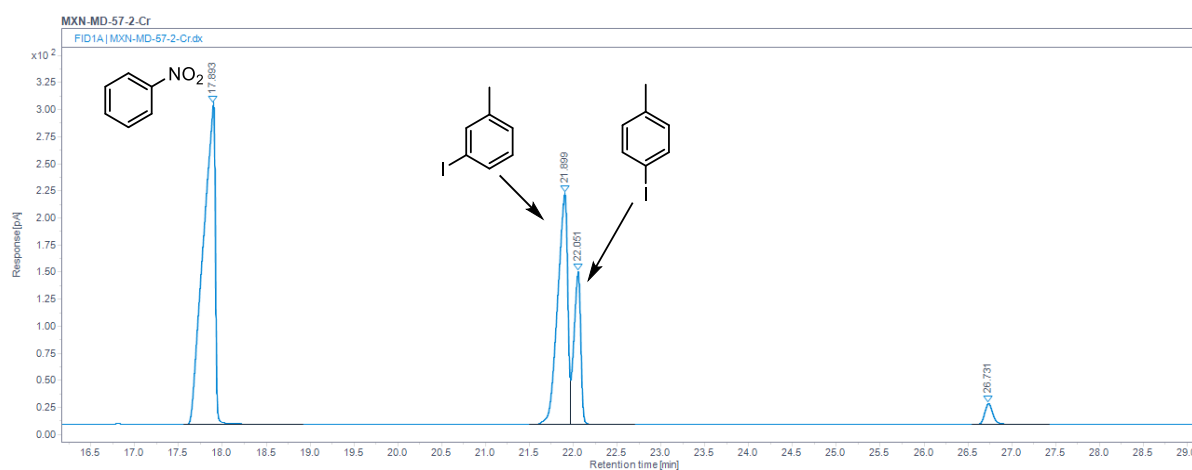

**1-iodo-3-methylbenzene (3c-meta) and 1-iodo-4-methylbenzene (3c-para): GC-FID trace of isolated compound**

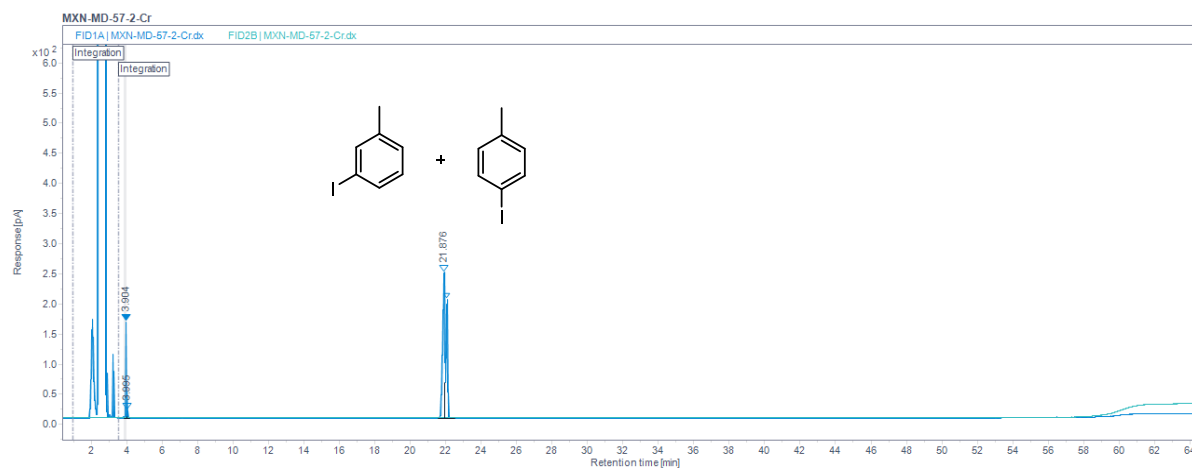

**1-iodo-3-methylbenzene (3c-meta) and 1-iodo-4-methylbenzene (3c-para): GC-FID trace of isolated compound (close-up)**

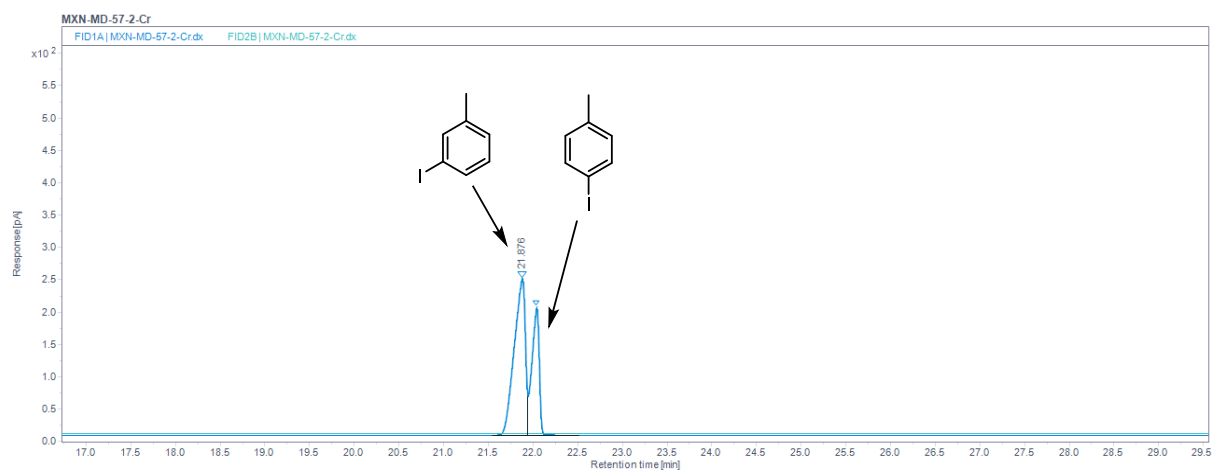

**1-iodo-3-propylbenzene (3d-meta) and 1-iodo-4-propylbenzene (3d-para): GC-FID trace of crude reaction mixture**

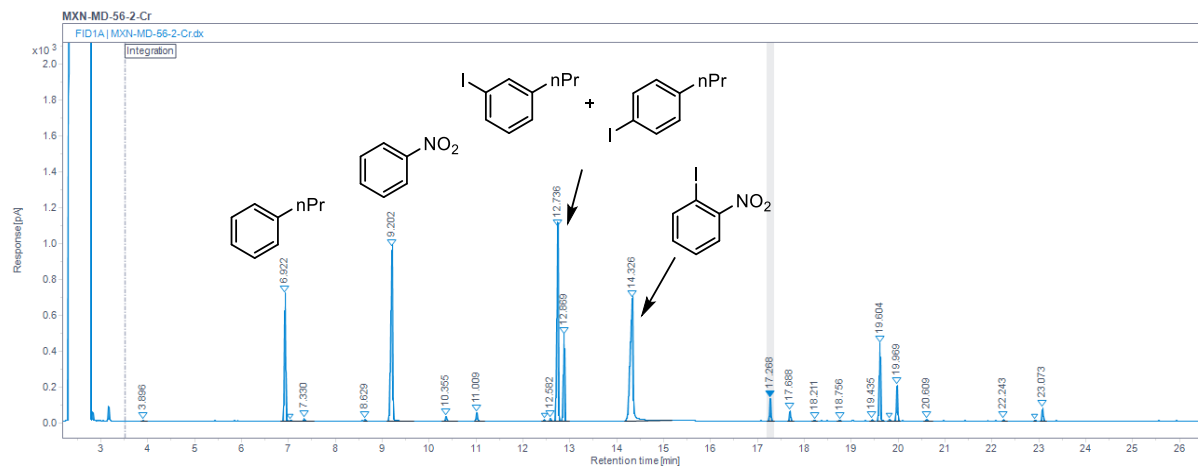

**1-iodo-3-propylbenzene (3d-meta) and 1-iodo-4-propylbenzene (3d-para): GC-FID trace of isolated compound**

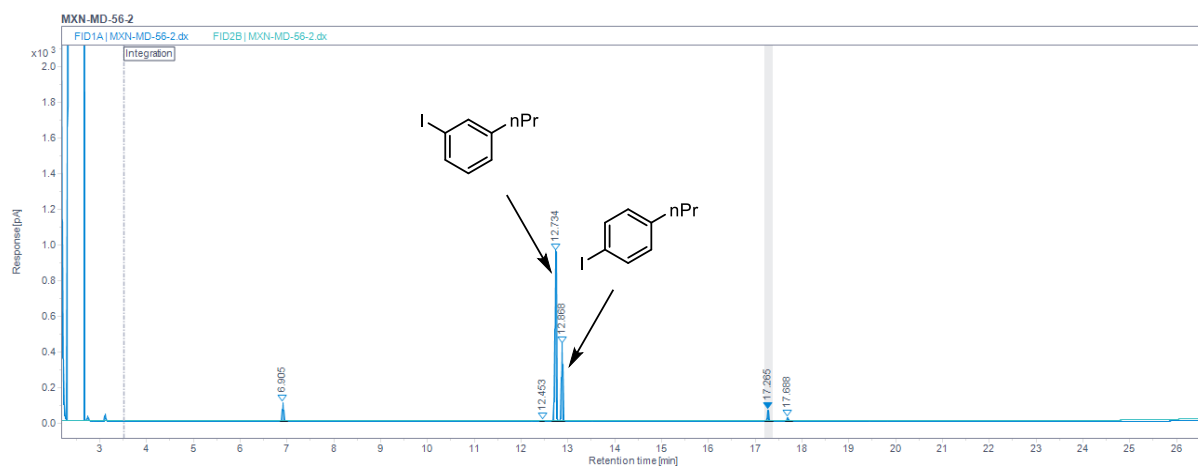

***tert*-butyl(3-iodophenyl)dimethylsilane (3e-meta) and *tert*-butyl(4-iodophenyl)dimethylsilane (3e-para): GC-FID trace of crude reaction mixture**

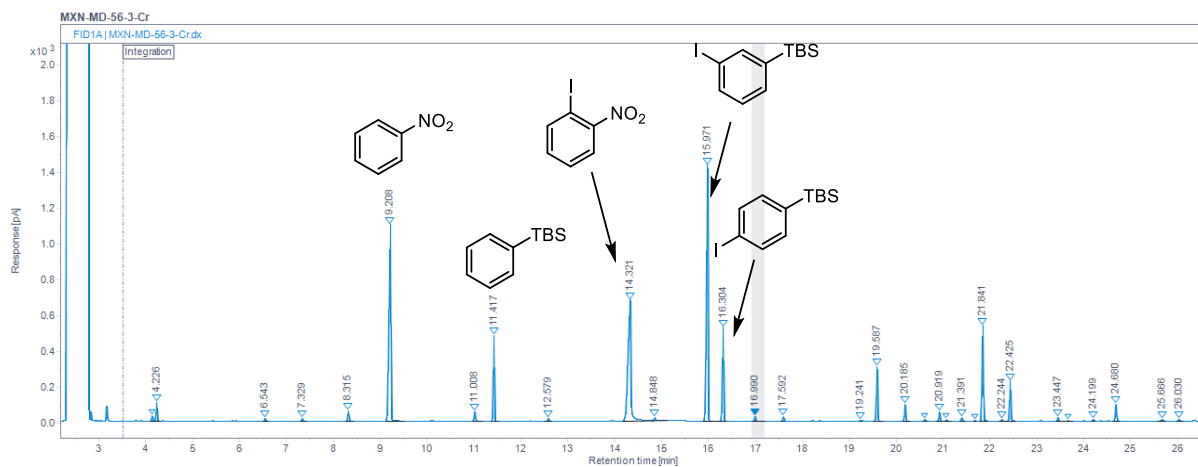

***tert*-butyl(3-iodophenyl)dimethylsilane (3e-meta) and *tert*-butyl(4-iodophenyl)dimethylsilane (3e-para): GC-FID trace of isolated compound**

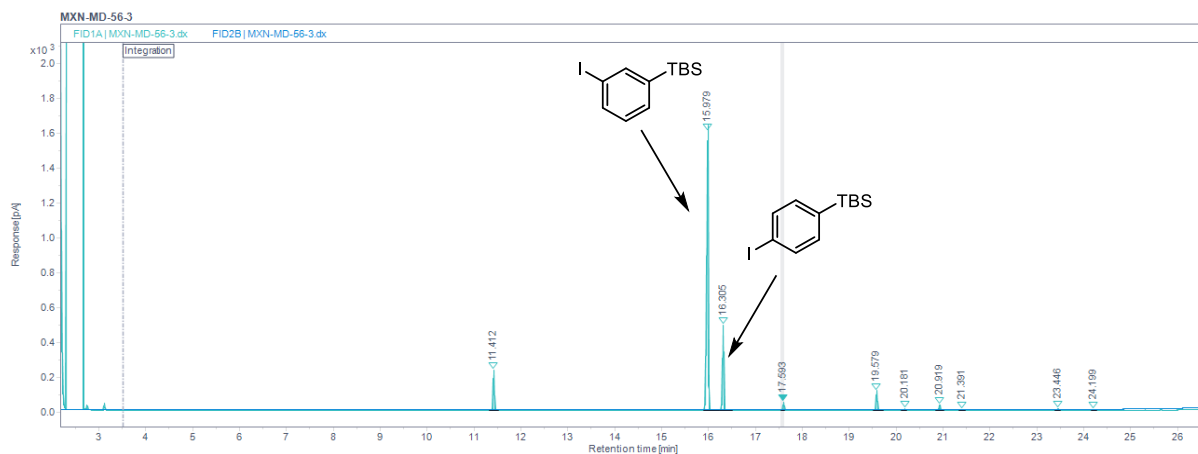

**1-chloro-3-iodobenzene (3f-meta) and 1-chloro-4-iodobenzene (3f-para): GC-FID trace of crude reaction mixture**

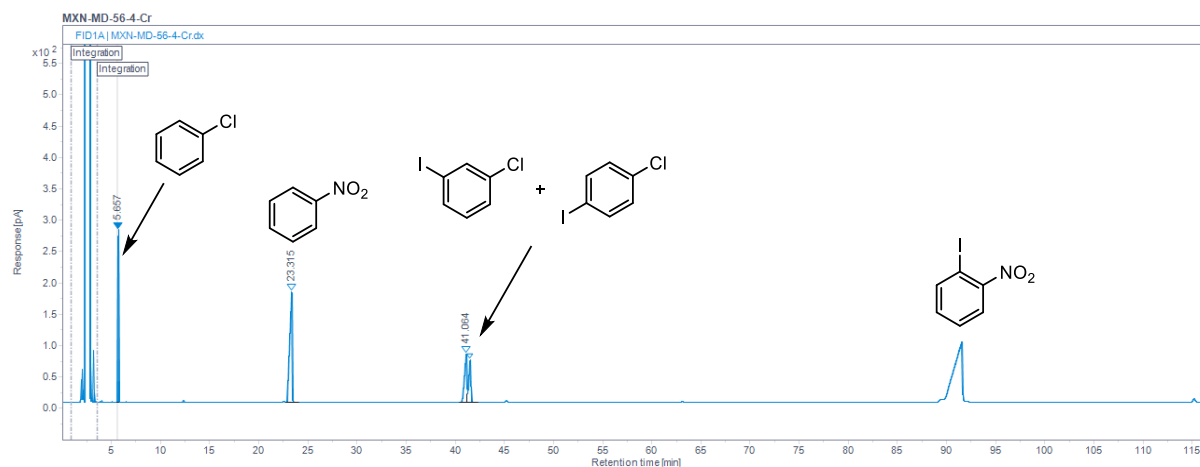

**1-chloro-3-iodobenzene (3f-meta) and 1-chloro-4-iodobenzene (3f-para): GC-FID trace of crude reaction mixture (close-up).**

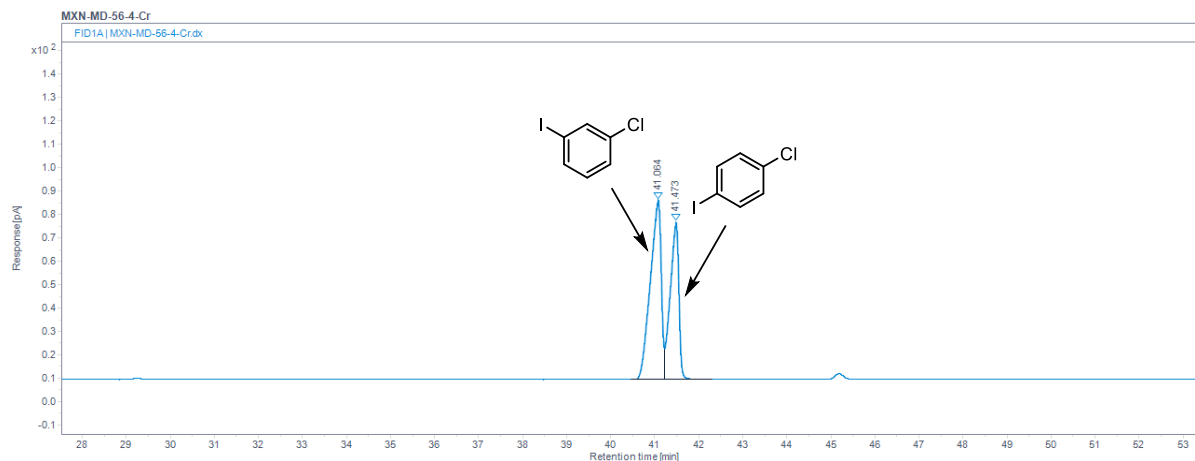

**1-chloro-3-iodobenzene (3f-meta) and 1-chloro-4-iodobenzene (3f-para): GC-FID trace of isolated compound (close-up).**

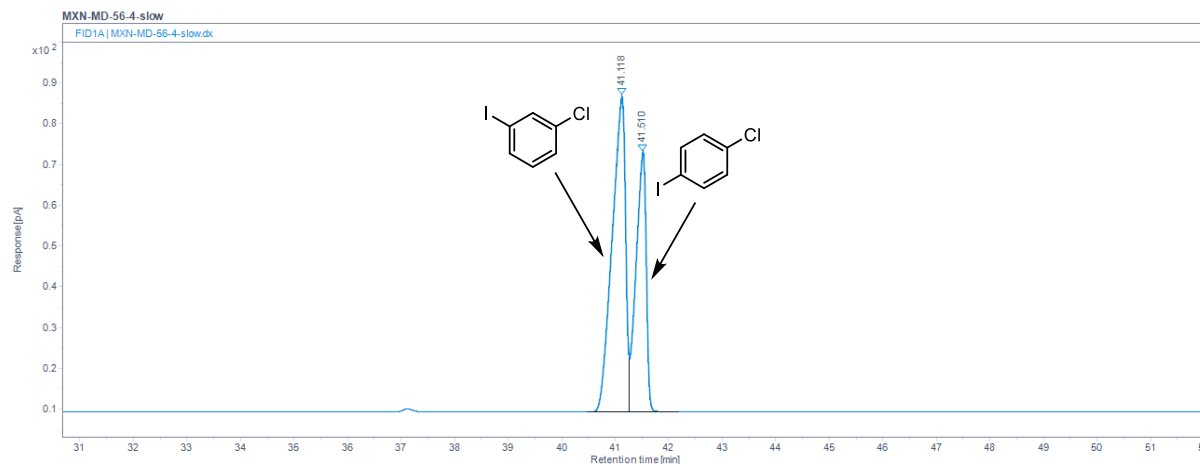

### 4-iodo-1,2-dimethylbenzene (3i): GC-FID trace of crude reaction mixture

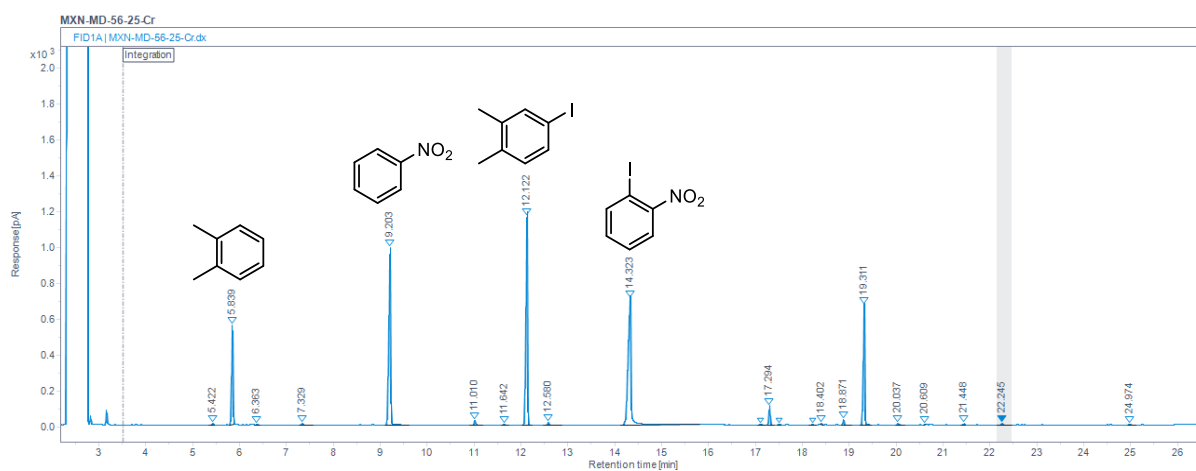

### 4-iodo-1,2-dimethylbenzene (3i): GC-FID trace of isolated compound

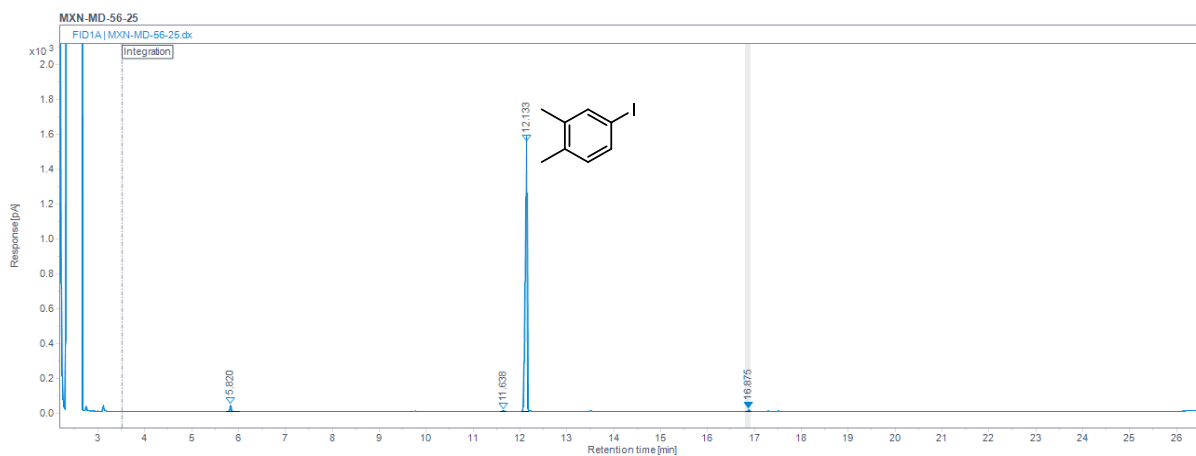

**ethyl 4-iodo-2-methylbenzoate (3k-β) and ethyl 5-iodo-2-methylbenzoate (3k-β'): GC-FID trace of crude reaction mixture**

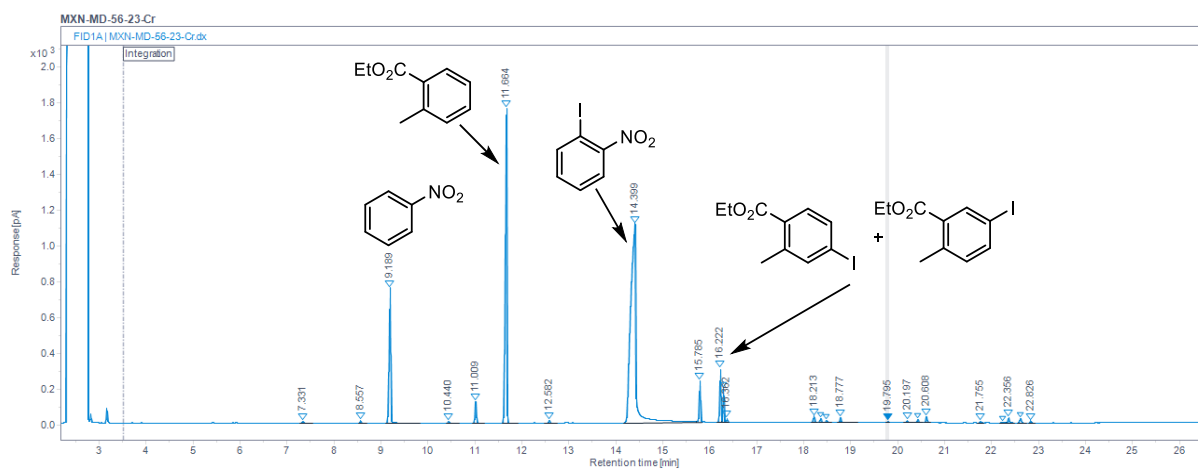

**ethyl 4-iodo-2-methylbenzoate (3k-β) and ethyl 5-iodo-2-methylbenzoate (3k-β'): GC-FID trace of crude reaction mixture (close-up)**

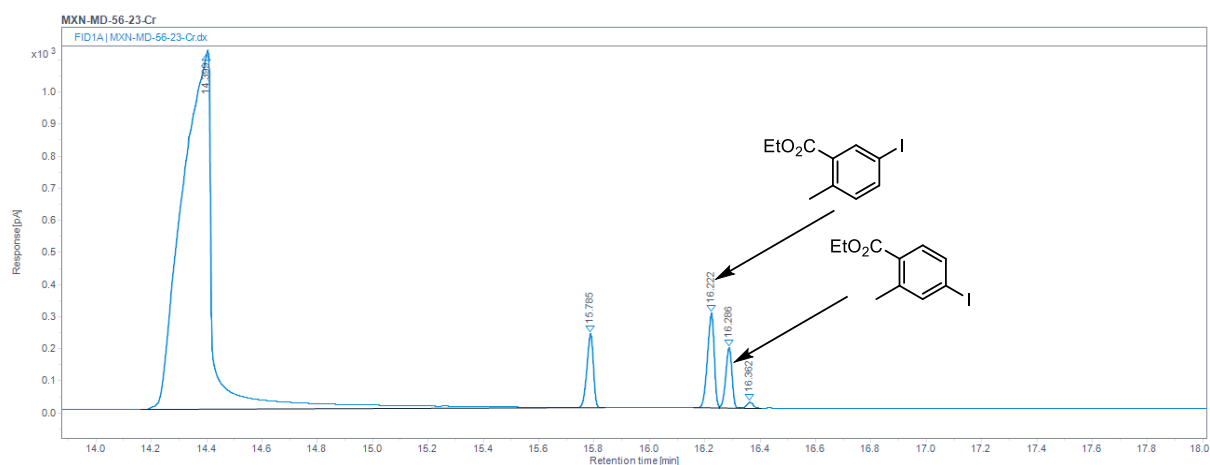

**ethyl 4-iodo-2-methylbenzoate (3k-β) and ethyl 5-iodo-2-methylbenzoate (3k-β'): GC-FID trace of isolated compound**

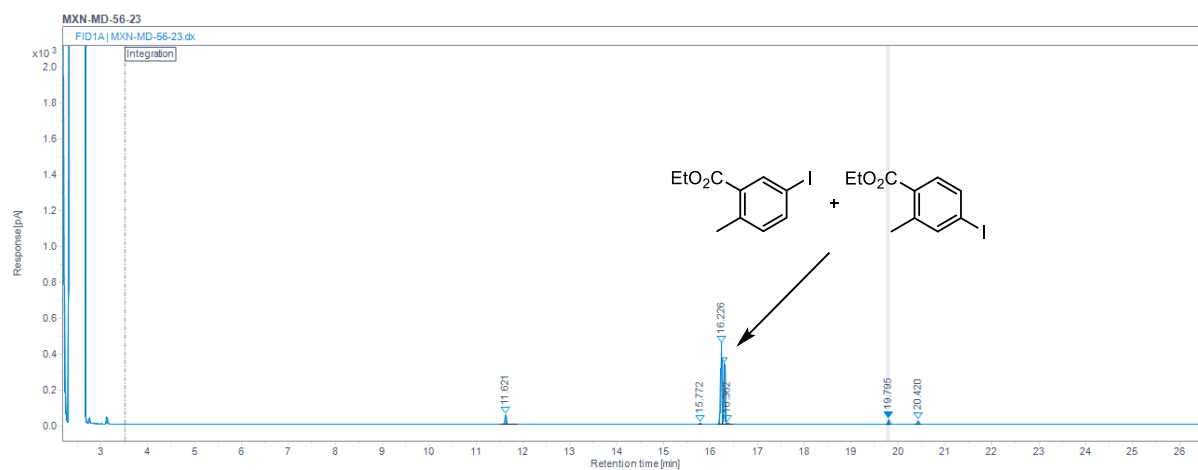

**ethyl 4-iodo-2-methylbenzoate (3k- $\beta$ ) and ethyl 5-iodo-2-methylbenzoate (3k- $\beta'$ ): GC-FID trace of isolated compound (close-up)**

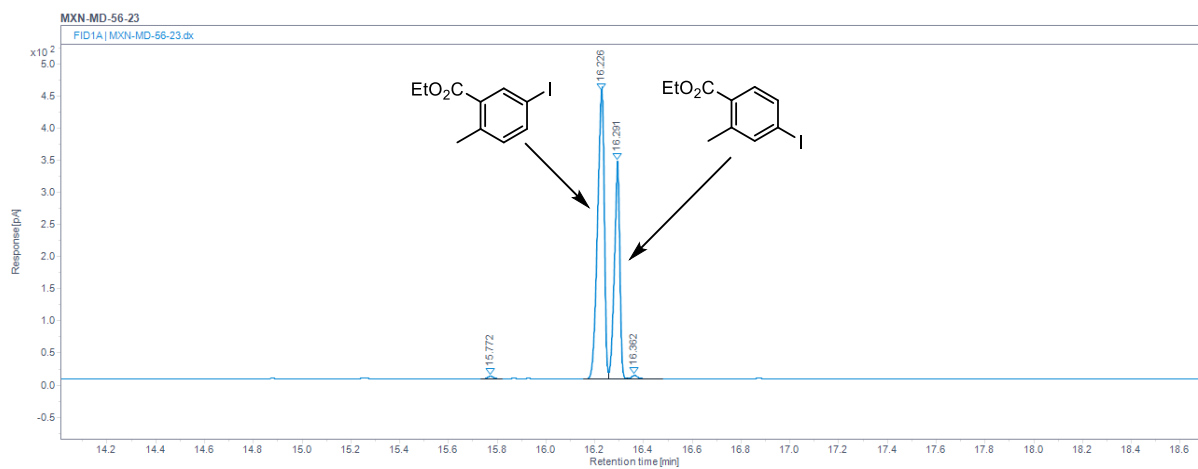



### 1-iodo-3,5-dimethylbenzene (3l): GC-FID trace of crude reaction mixture

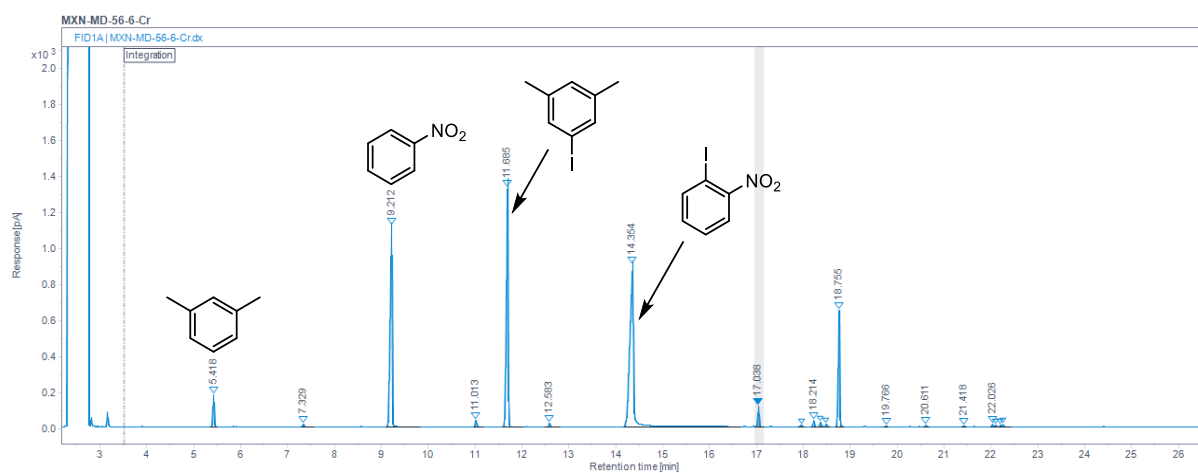

### 1-iodo-3,5-dimethylbenzene (3l): GC-FID trace of isolated compound

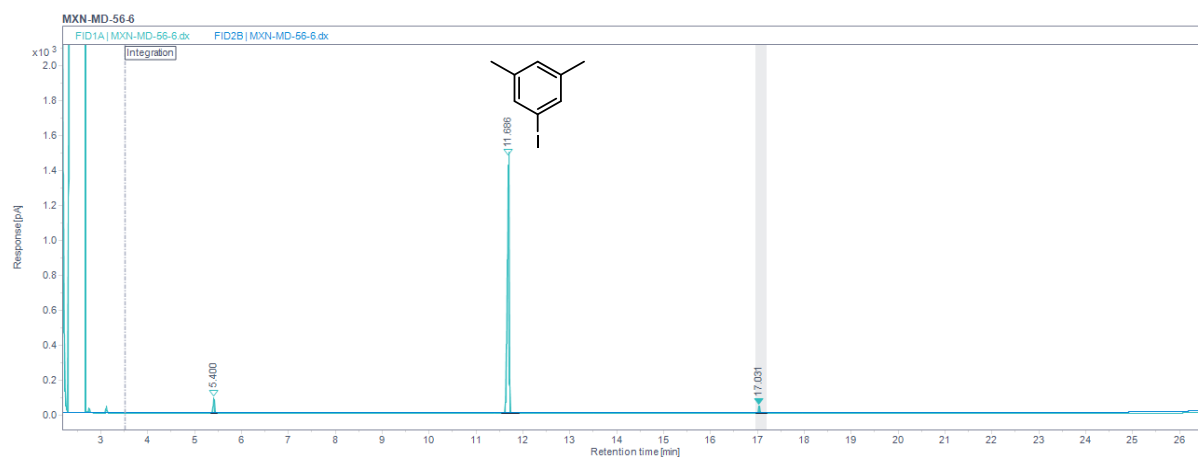

### 1-fluoro-3-iodo-5-methylbenzene (3m): GC-FID trace of crude reaction mixture

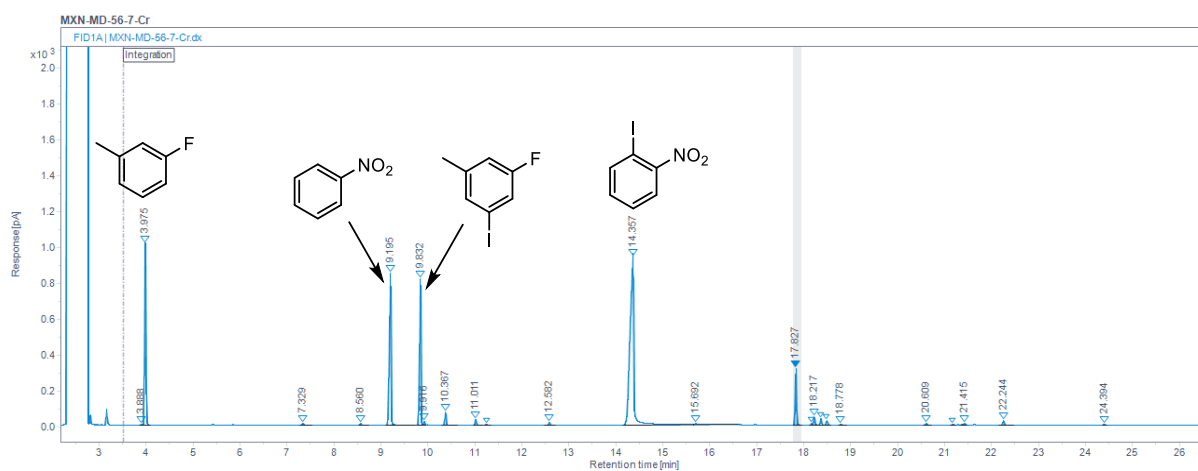

### 1-fluoro-3-iodo-5-methylbenzene (3m): GC-FID trace of isolated compound

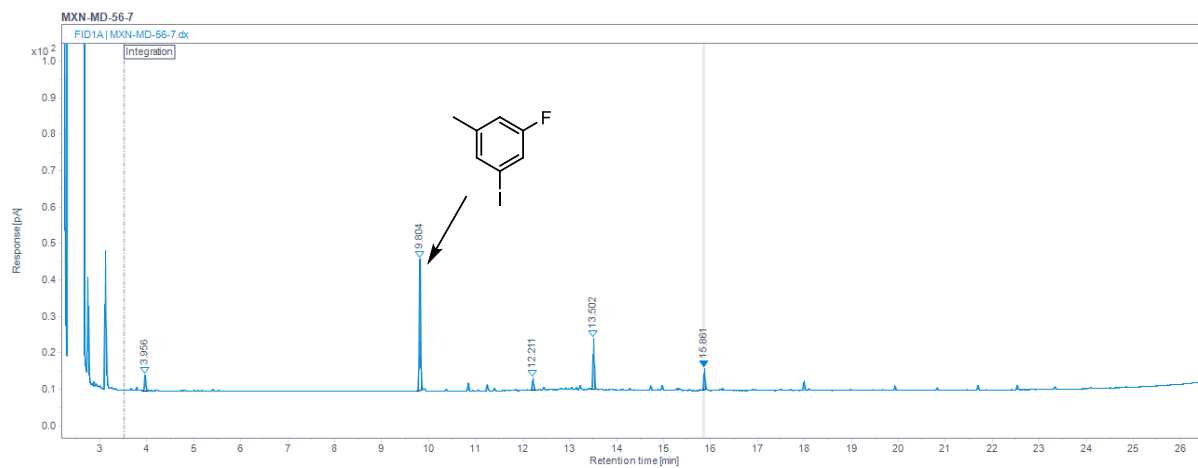

### 1-chloro-3-iodo-5-methylbenzene (3n): GC-FID trace of crude reaction mixture

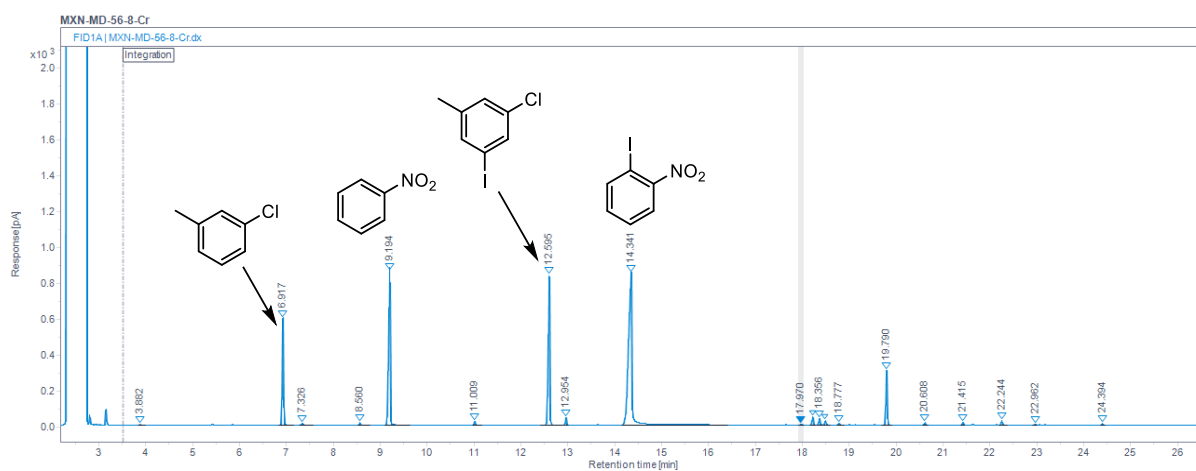

### 1-chloro-3-iodo-5-methylbenzene (3n): GC-FID trace of isolated compound

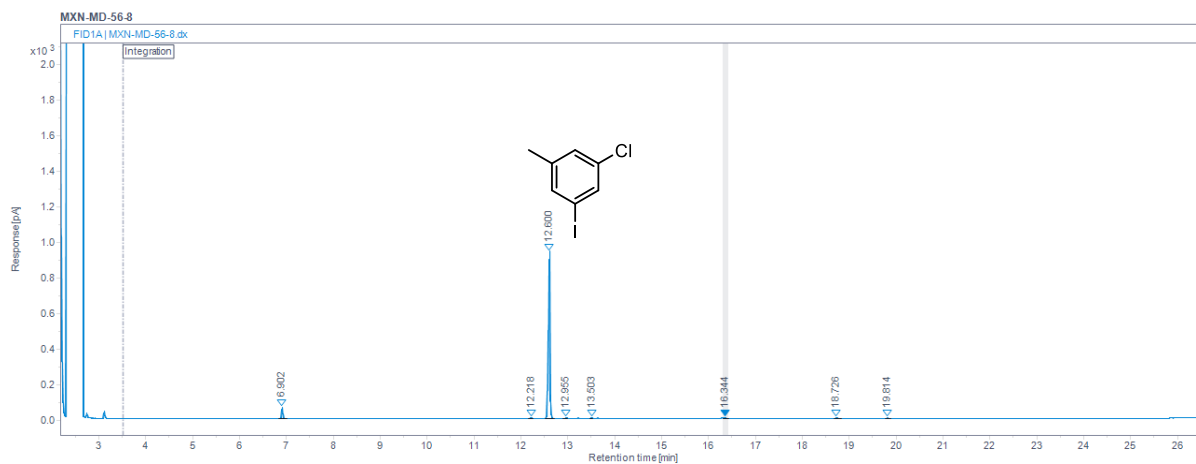

### 1-bromo-3-iodo-5-methylbenzene (3o): GC-FID trace of crude reaction mixture

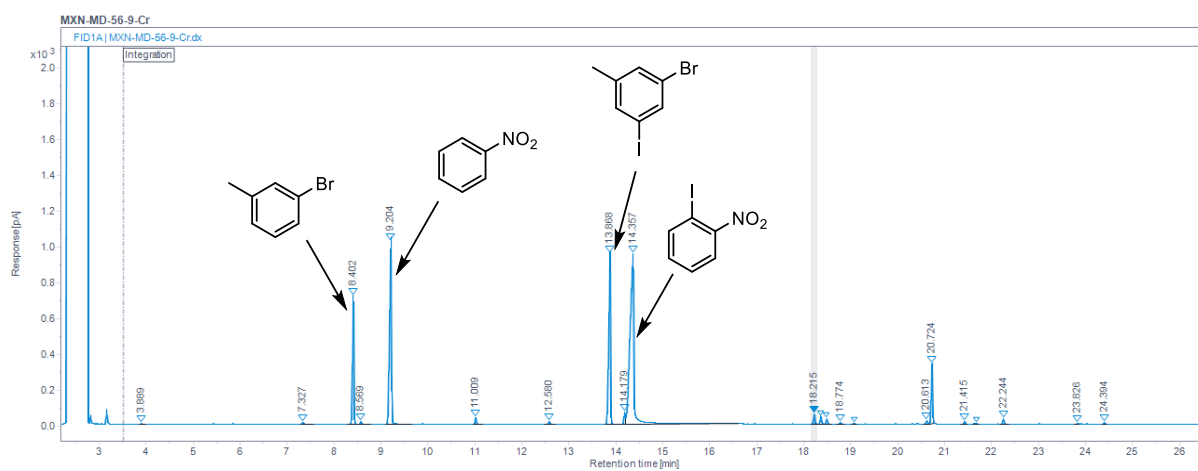

### 1-bromo-3-iodo-5-methylbenzene (3o): GC-FID trace of isolated compound

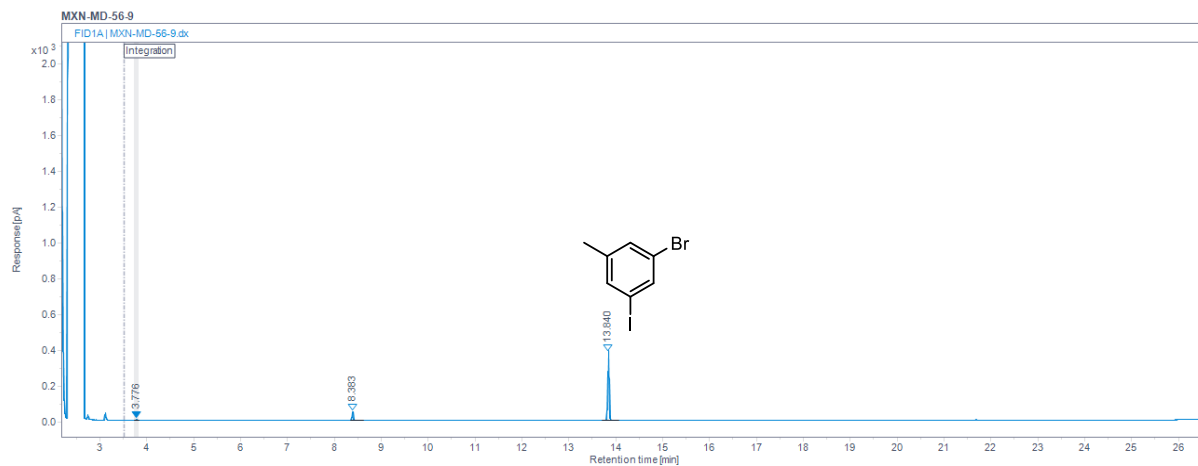

**1-iodo-2-(2-methoxyethyl)-4-methylbenzene (3r- $\alpha$ ) and 1-iodo-3-(2-methoxyethyl)-5-methylbenzene (3r- $\beta$ ): GC-FID trace of crude reaction mixture**

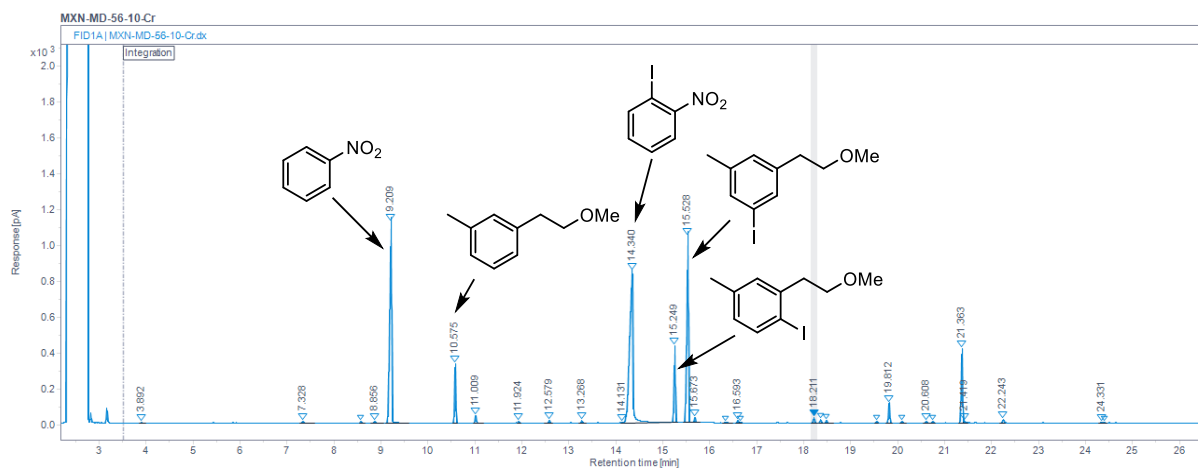

**1-iodo-2-(2-methoxyethyl)-4-methylbenzene (3r- $\alpha$ ) and 1-iodo-3-(2-methoxyethyl)-5-methylbenzene (3r- $\beta$ ): GC-FID trace of isolated compound**

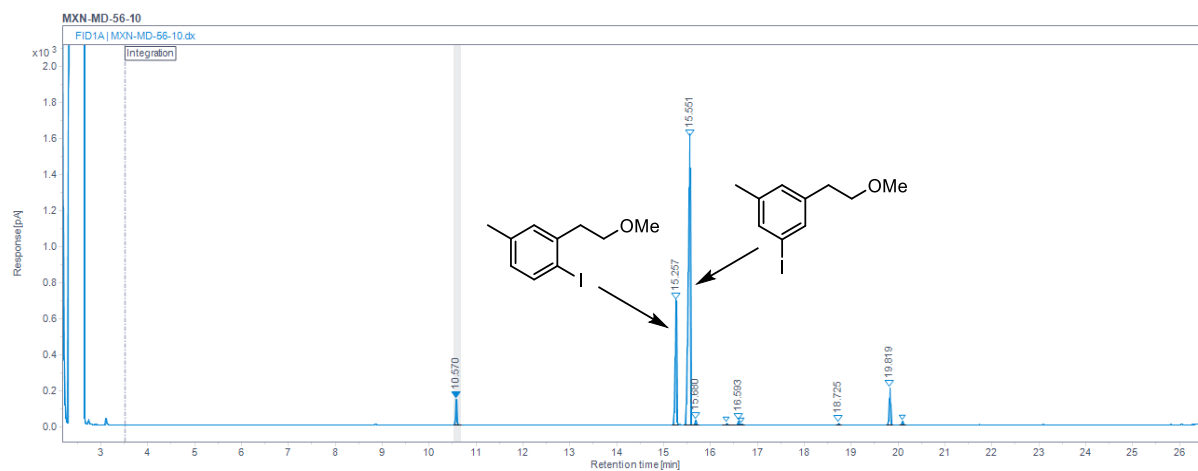

**2-iodo-5-methylbenzyl acetate (3s- $\alpha$ ) and 3-iodo-5-methylbenzyl acetate (3s- $\beta$ ): GC-FID trace of crude reaction mixture**

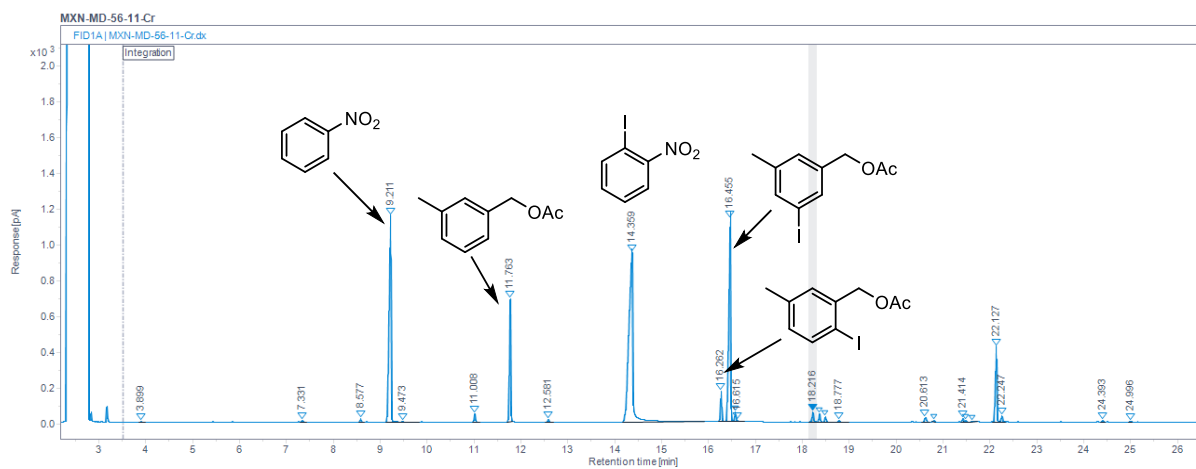

**2-iodo-5-methylbenzyl acetate (3s- $\alpha$ ) and 3-iodo-5-methylbenzyl acetate (3s- $\beta$ ): GC-FID trace of isolated compound**

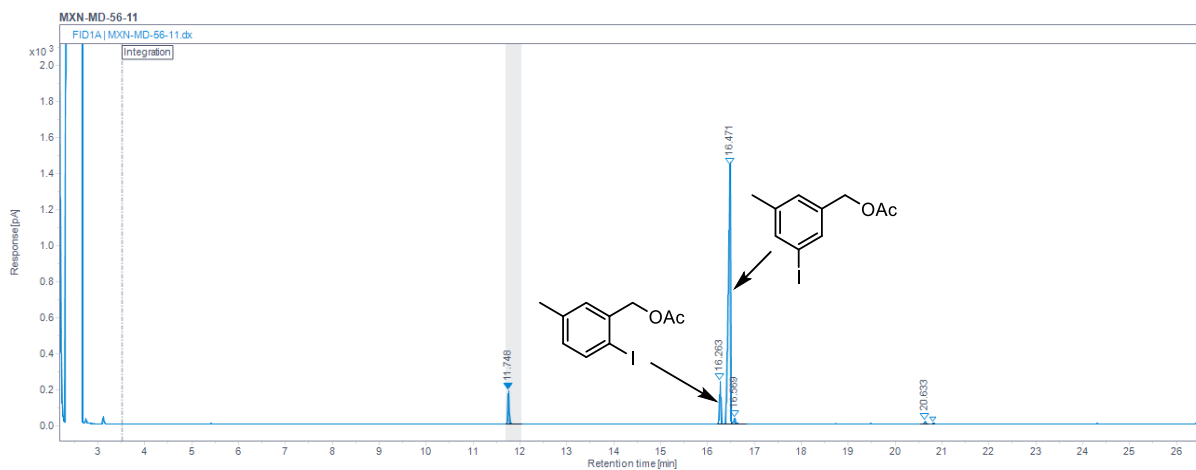

**2-(3-iodo-5-methylphenethyl)isoindoline-1,3-dione (3t): GC-FID trace of crude reaction mixture**

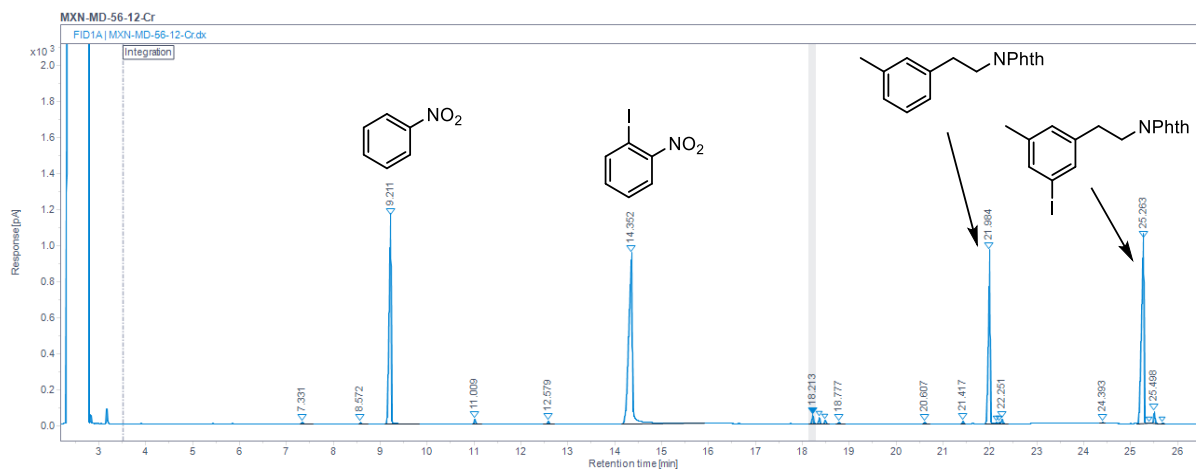

**2-(3-iodo-5-methylphenethyl)isoindoline-1,3-dione (3t): GC-FID trace of isolated compound**

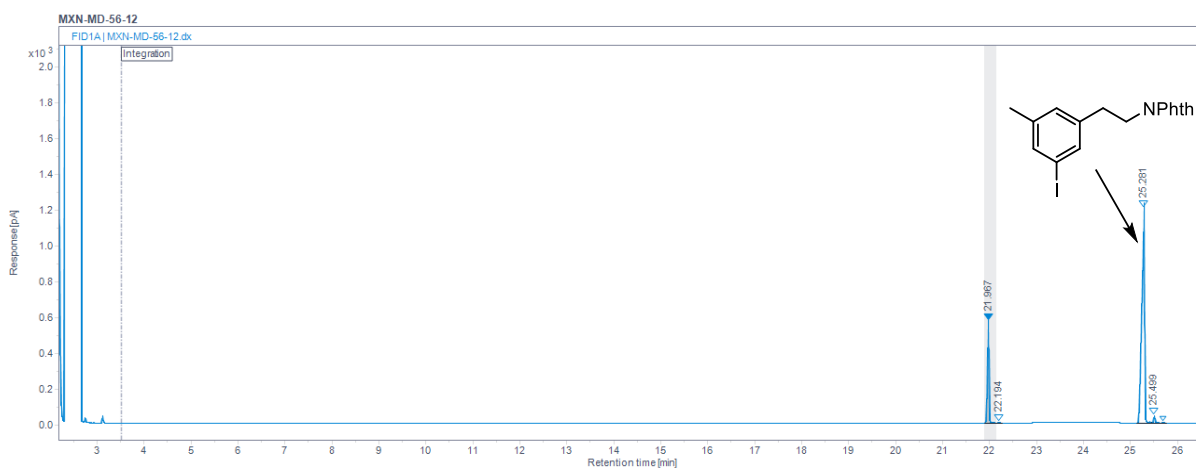

**ethyl 3-(2-iodo-5-methylphenyl)propanoate (3v- $\alpha$ ) and ethyl 3-(3-iodo-5-methylphenyl)propanoate (3v- $\beta$ ): GC-FID trace of crude reaction mixture**

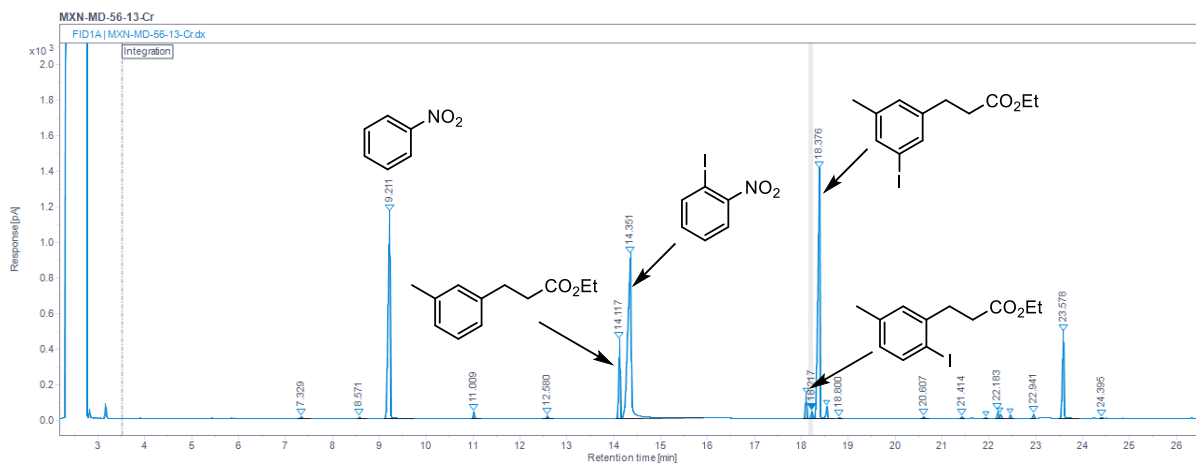

**ethyl 3-(2-iodo-5-methylphenyl)propanoate (3v- $\alpha$ ) and ethyl 3-(3-iodo-5-methylphenyl)propanoate (3v- $\beta$ ): GC-FID trace of isolated compound**

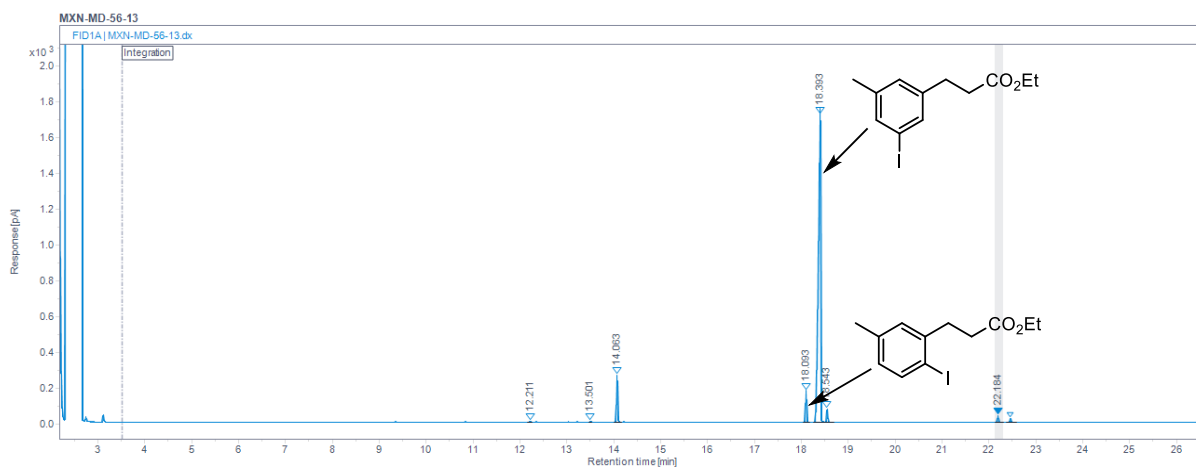



### 5-iodo-1-methoxy-2,3-dimethylbenzene (3w): GC-FID trace of crude reaction mixture

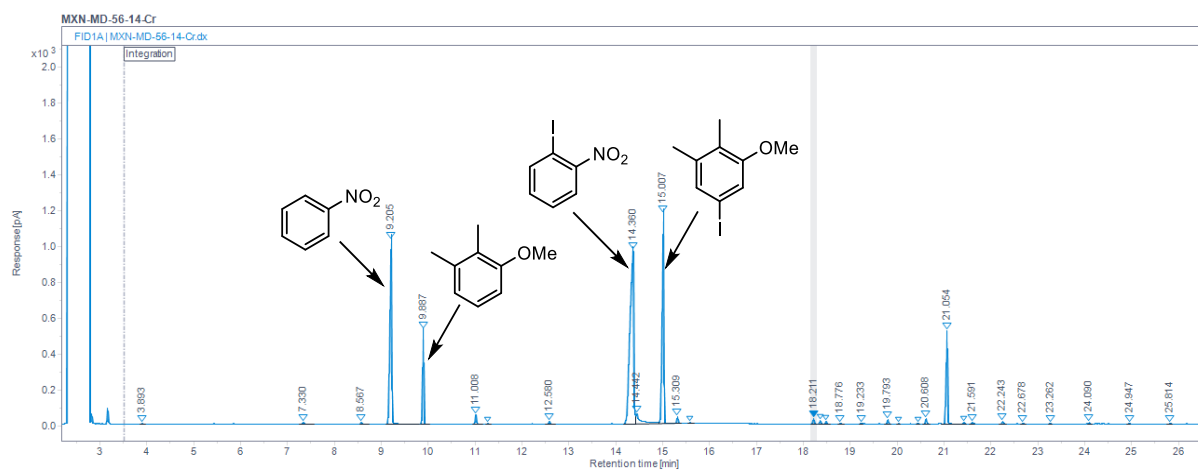

### 5-iodo-1-methoxy-2,3-dimethylbenzene (3w): GC-FID trace of isolated compound

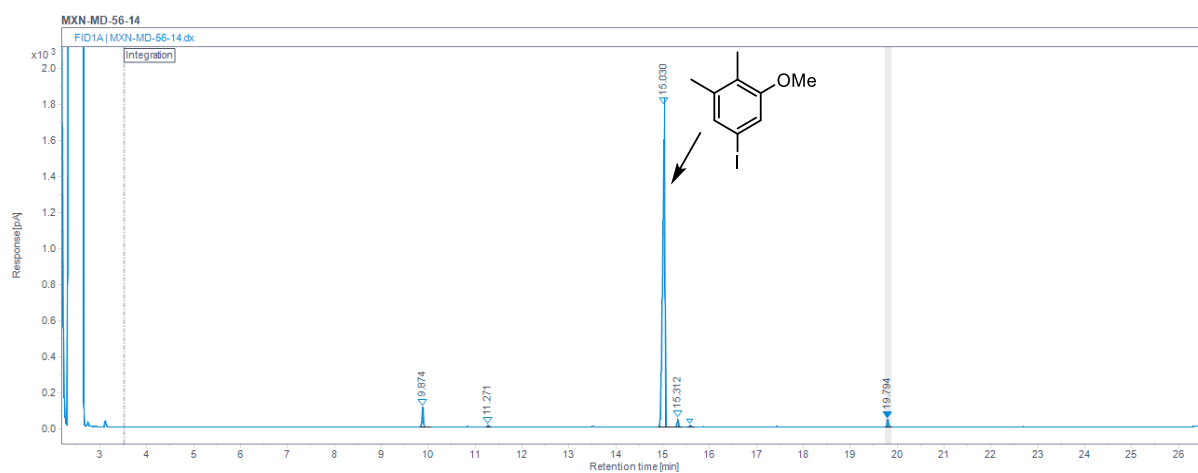

**1-fluoro-5-iodo-3-methoxy-2-methylbenzene (3x): GC-FID trace of crude reaction mixture**

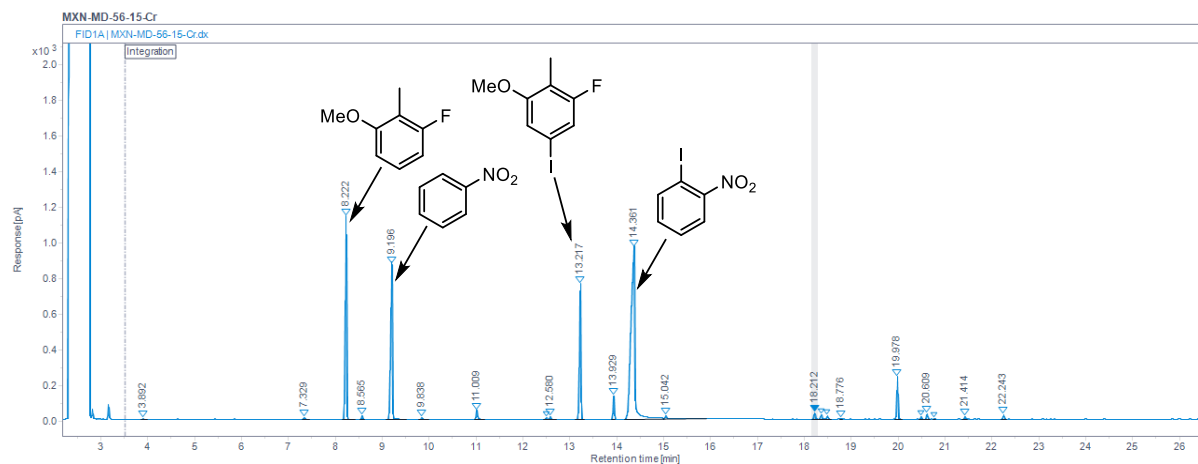

**1-fluoro-5-iodo-3-methoxy-2-methylbenzene (3x): GC-FID trace of isolated compound**

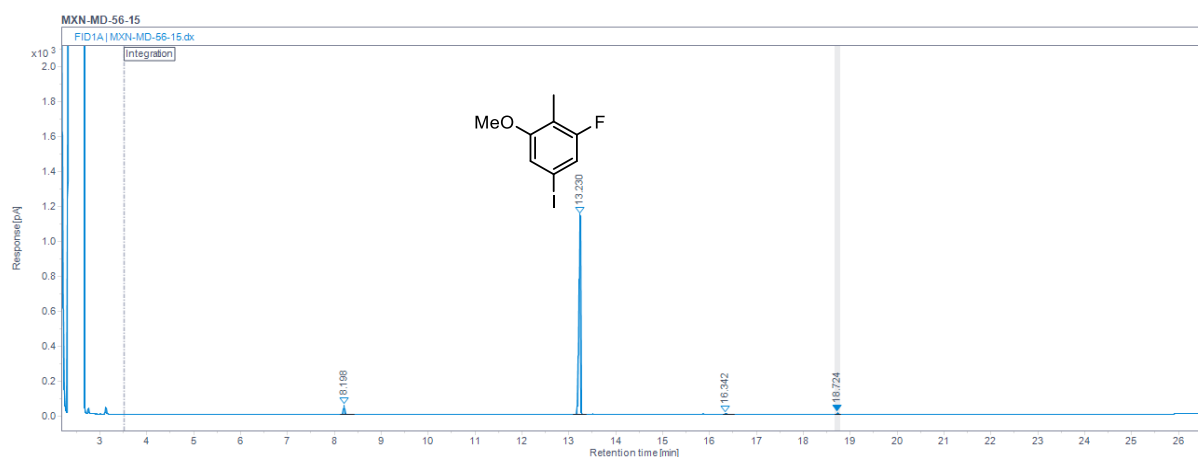

**methyl 4-iodo-2,6-dimethylbenzoate (3y): GC-FID trace of crude reaction mixture**

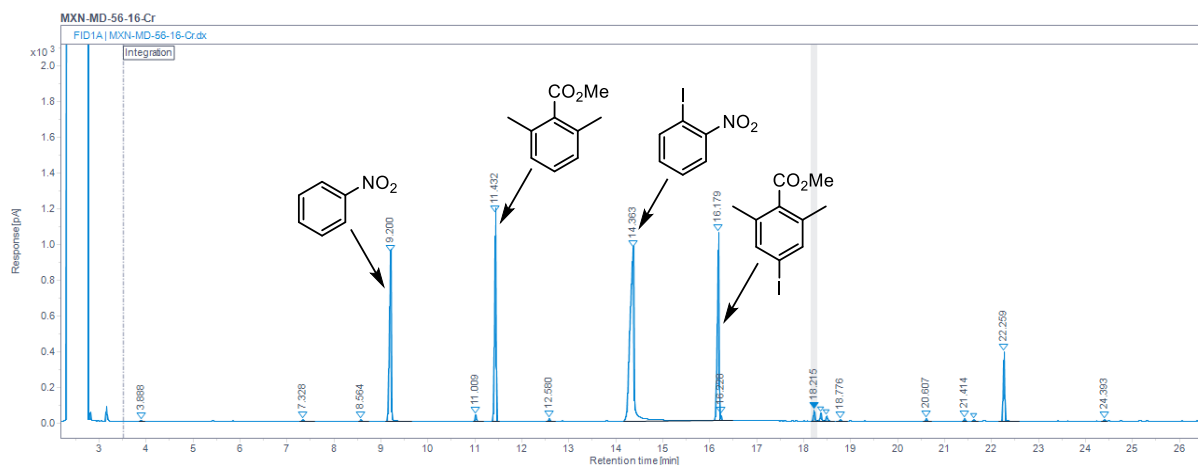

**methyl 4-iodo-2,6-dimethylbenzoate (3y): GC-FID trace of isolated compound**

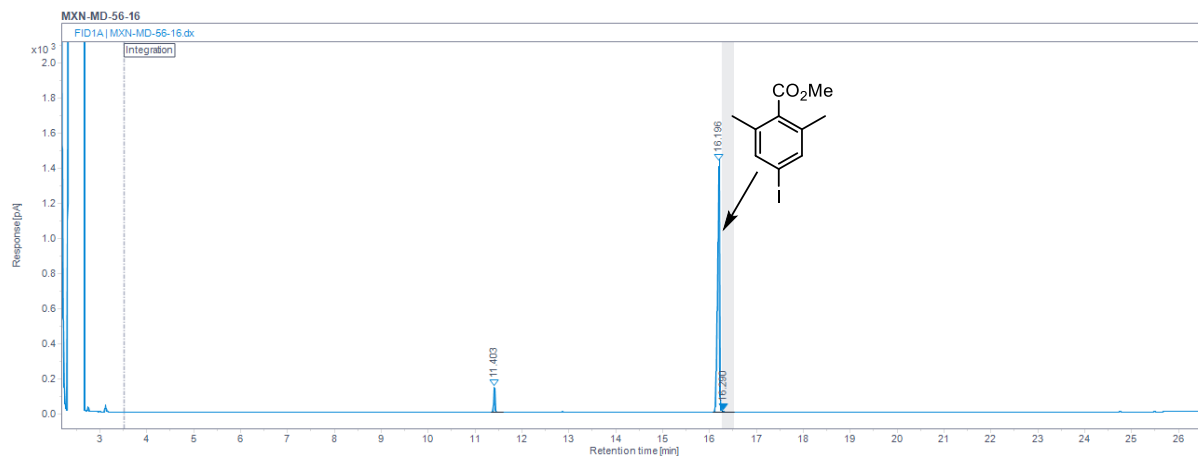

### 1-(4-iodo-2,6-dimethylphenyl)ethan-1-one (3ab): GC-FID trace of crude reaction mixture

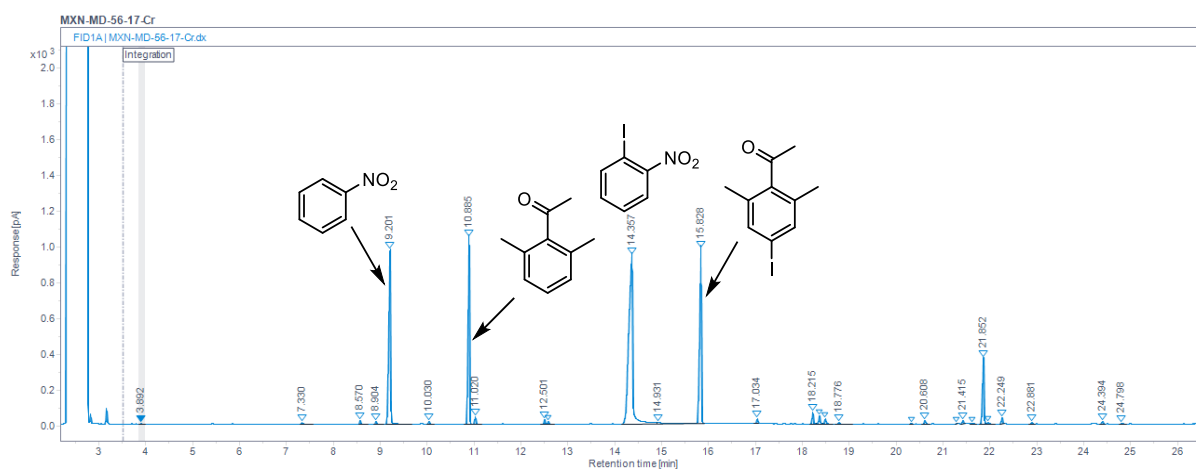

### 1-(4-iodo-2,6-dimethylphenyl)ethan-1-one (3ab): GC-FID trace of isolated compound

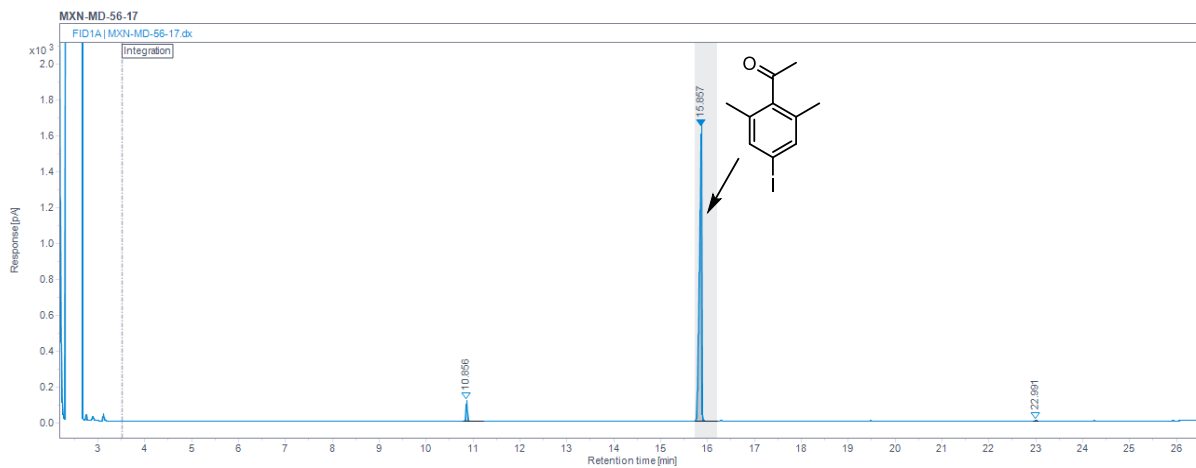

### 5-iodo-1,3-diisopropyl-2-methoxybenzene (3ac): GC-FID trace of crude reaction mixture

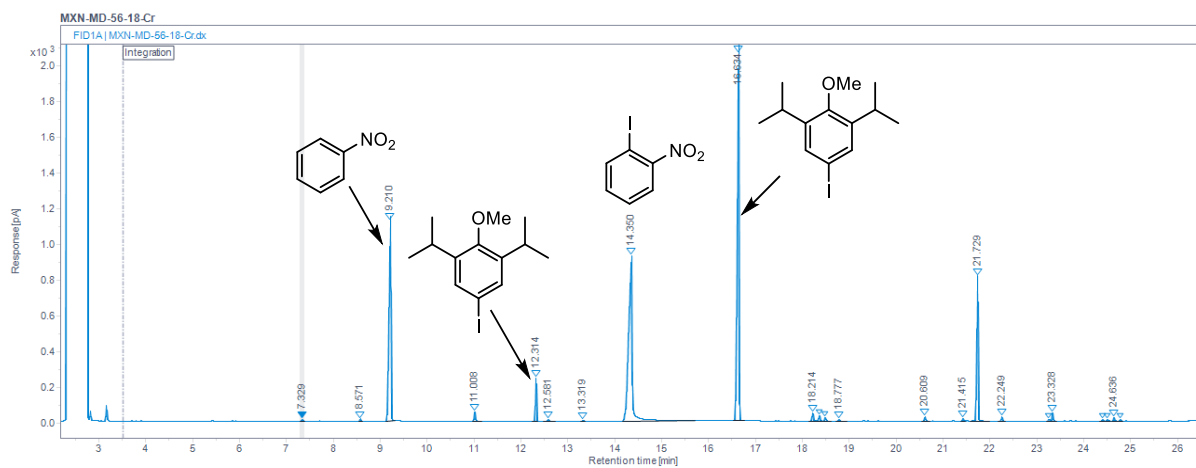

### 5-iodo-1,3-diisopropyl-2-methoxybenzene (3ac): GC-FID trace of isolated compound

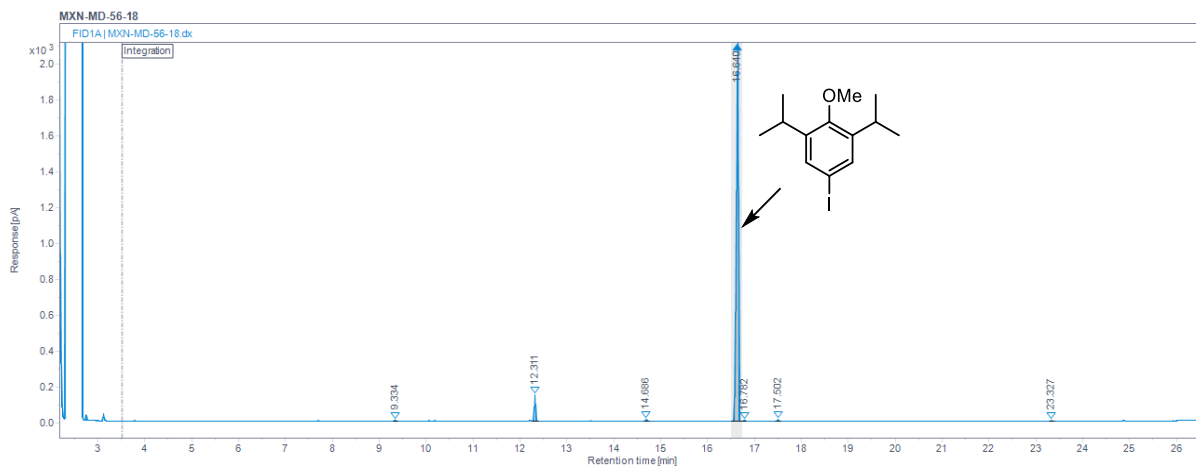

**methyl 2-(2-fluoro-3'-iodo-[1,1'-biphenyl]-4-yl)propanoate (3ag-meta) and methyl 2-(2-fluoro-4'-iodo-[1,1'-biphenyl]-4-yl)propanoate (3ag-para): GC-FID trace of crude reaction mixture**

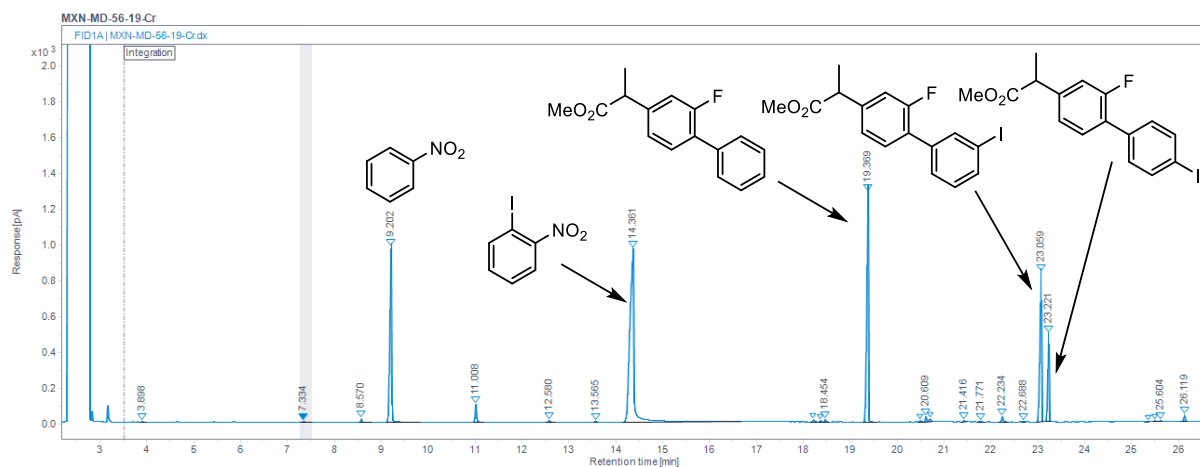

**methyl 2-(2-fluoro-3'-iodo-[1,1'-biphenyl]-4-yl)propanoate (3ag-meta) and methyl 2-(2-fluoro-4'-iodo-[1,1'-biphenyl]-4-yl)propanoate (3ag-para): GC-FID trace of isolated compound**

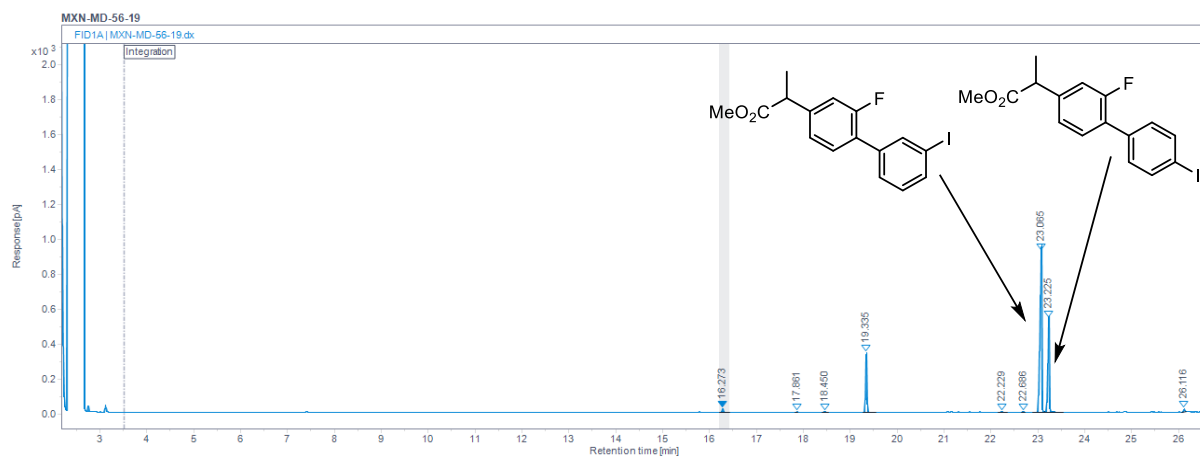

**methyl 3-iodo-5,6,7,8-tetrahydronaphthalene-1-carboxylate (3ah): GC-FID trace of crude reaction mixture**

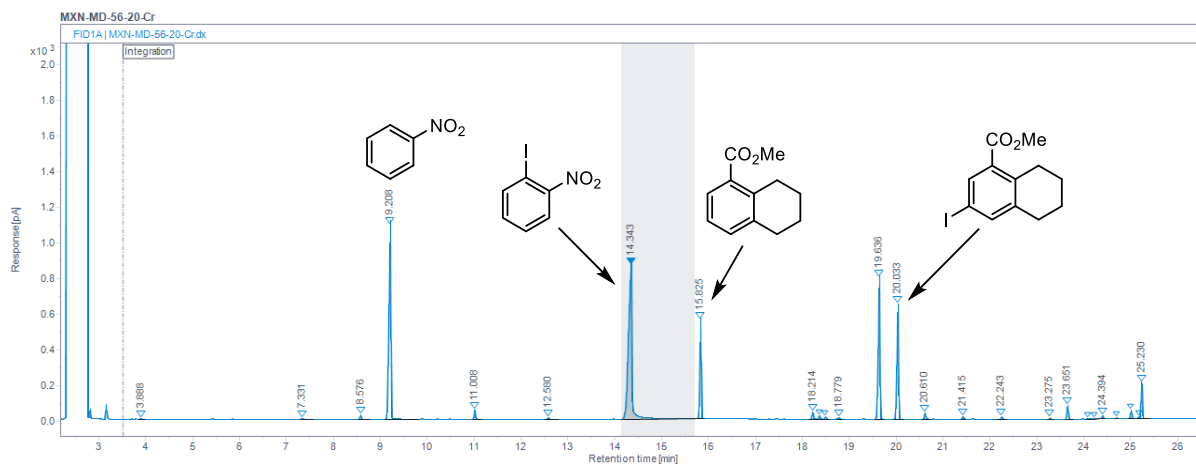

**methyl 3-iodo-5,6,7,8-tetrahydronaphthalene-1-carboxylate (3ah): GC-FID trace of isolated compound**

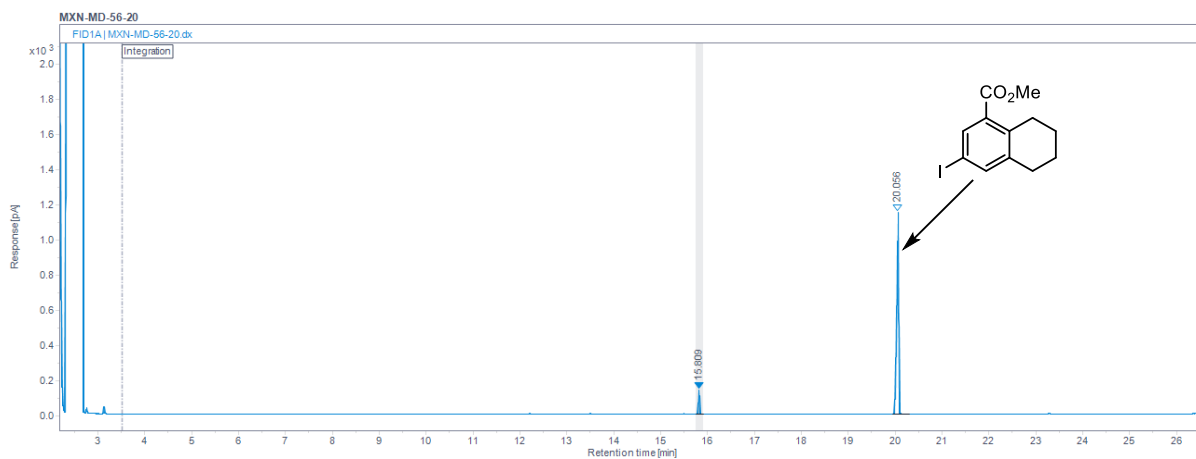

**1-iodo-2-(((1*R*,2*S*,5*R*)-2-isopropyl-5-methylcyclohexyl)oxy)-4-methylbenzene (3al- $\alpha$ ), 1-iodo-3-(((1*R*,2*S*,5*R*)-2-isopropyl-5-methylcyclohexyl)oxy)-5-methylbenzene (3al- $\beta$ ) and 1-iodo-4-(((1*R*,2*S*,5*R*)-2-isopropyl-5-methylcyclohexyl)oxy)-2-methylbenzene (3al- $\gamma$ ): GC-FID trace of crude reaction mixture**

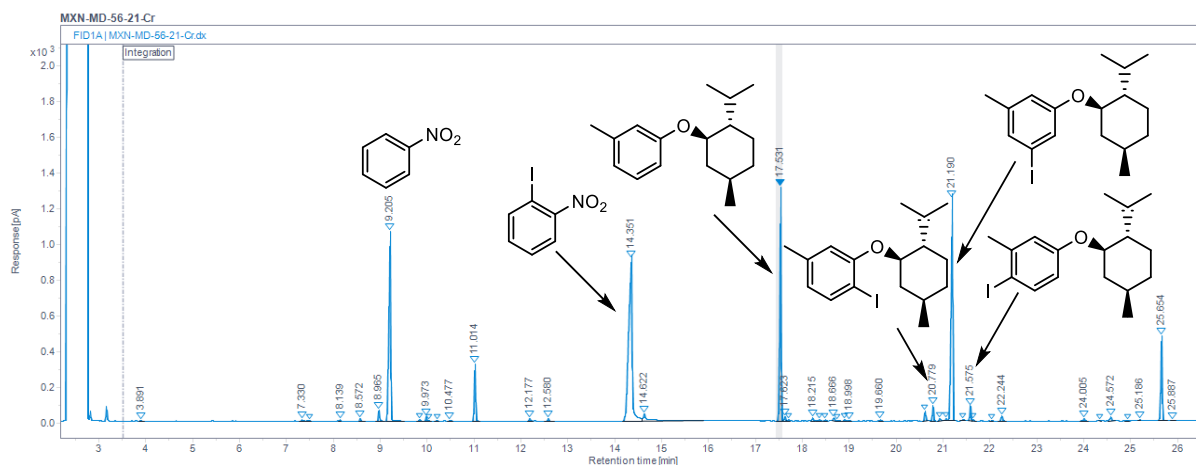

**1-iodo-2-(((1*R*,2*S*,5*R*)-2-isopropyl-5-methylcyclohexyl)oxy)-4-methylbenzene (3al- $\alpha$ ), 1-iodo-3-(((1*R*,2*S*,5*R*)-2-isopropyl-5-methylcyclohexyl)oxy)-5-methylbenzene (3al- $\beta$ ) and 1-iodo-4-(((1*R*,2*S*,5*R*)-2-isopropyl-5-methylcyclohexyl)oxy)-2-methylbenzene (3al- $\gamma$ ): GC-FID trace of isolated compound**

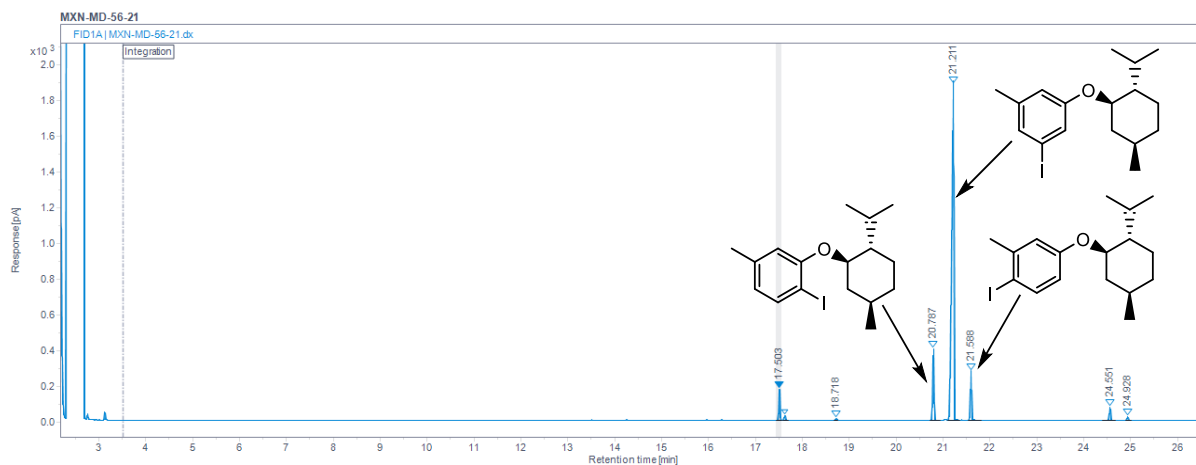



**1-iodo-2-((2-isopropyl-5-methylphenoxy)methyl)-4-methylbenzene (3am- $\alpha$ ), 2-((3-iodo-5-methylbenzyl)oxy)-1-isopropyl-4-methylbenzene (3am- $\beta$ ) and 1-iodo-5-isopropyl-2-methyl-4-((3-methylbenzyl)oxy)benzene (3am- $\alpha'$ ): GC-FID trace of crude reaction mixture**

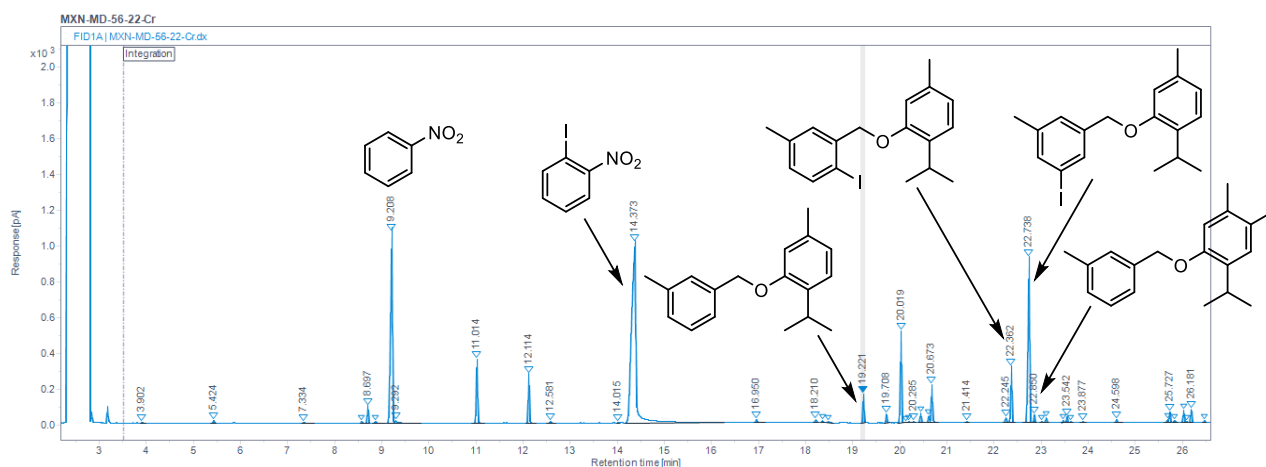

**1-iodo-2-((2-isopropyl-5-methylphenoxy)methyl)-4-methylbenzene (3am- $\alpha$ ), 2-((3-iodo-5-methylbenzyl)oxy)-1-isopropyl-4-methylbenzene (3am- $\beta$ ) and 1-iodo-5-isopropyl-2-methyl-4-((3-methylbenzyl)oxy)benzene (3am- $\alpha'$ ): GC-FID trace of isolated compound**

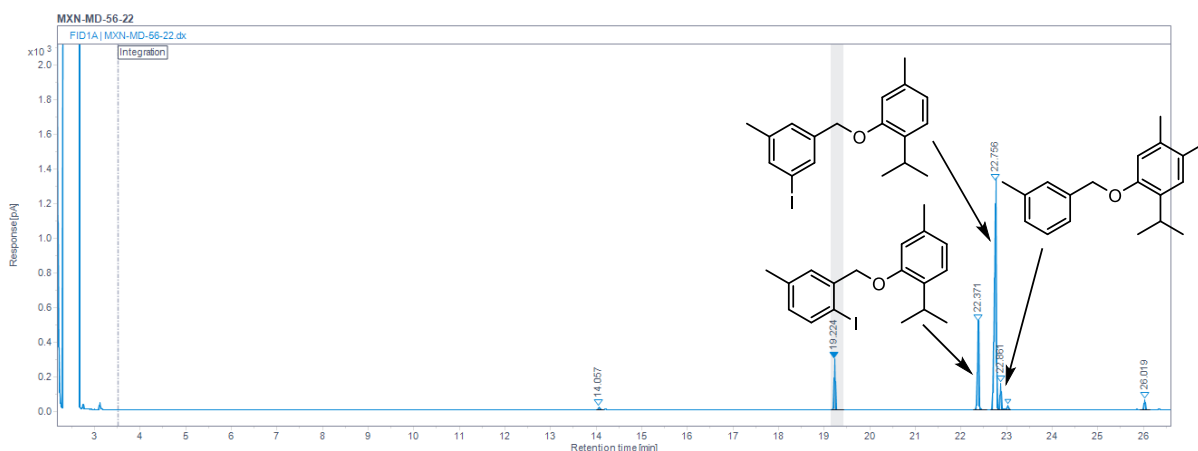

## 6 Preliminary Mechanistic Studies

### General procedure C: Kinetic Analysis by Initial Rates

Reactions for determining initial rates were conducted in an oven-dried 10 mL Schlenk tube to which a Teflon-coated magnetic stirring bar was added. The Schlenk tube was evacuated and backfilled with argon. A stock solution was prepared with the solvent and the ligands. An aliquot (1.0 mL) was used to dispense Ac-Gly-OH (4.68 mg, 0.040 mmol, 0.4 equiv), quinoxaline (1.95 mg, 0.015 mmol, 0.15 equiv) and HFIP (1.0 mL) to each vial. The reaction vial was charged with Ag<sub>2</sub>O (3.48 mg, 0.015 mmol, 0.15 equiv) or AgNO<sub>3</sub> (10.2 mg, 0.030 mmol, 0.3 equiv.), ortho-xylene (**1i**) (10.6 mg, 0.100 mmol), 1-iodo-2-nitrobenzene (**2**) (50.0 mg, 0.200 mmol, 2.0 equiv.), and the catalyst stock solution (1.0 mL). The reaction vessel was tightly sealed with a screw cap and placed into a preheated aluminum metal block with a tightly fitting recess on a magnetic stirrer with 1000 rotations per minute. After the reaction time, which was precisely measured by a timer, the reaction mixture was quickly cooled to -78 °C in an acetone/dry ice bath for approximately 2 minutes until frozen solid.

After letting the reaction mixture warm up to room temperature, 1,3,5-trimethylbenzene (6.9 mg, 0.058 mmol) was added to the vial and the reaction mixture was diluted with ethyl acetate (2 mL). After thorough mixing, an aliquot (500 µL) of the resulting solution was filtered over a short silica column using ethyl acetate as the eluent and the filtrate collected in a 2 mL vial. All yields given for the determination of initial rates result from GC-FID analysis of the crude reaction mixture using 1,3,5-trimethylbenzene as internal standard. The yields were used to obtain the initial rates and standard errors using the linear fit tool of the OriginPro 2022 program.<sup>12</sup> For each initial rate 5 individual experiments were conducted with a reaction time of 20, 40, 60, 80 and 100 minutes for ortho-xylene (**1i**). The initial rates were then plotted against the varied reagent.

## Scrambling Experiments

In order to elucidate the nature of the reaction being either a process where the product formation is kinetically or thermodynamically controlled, scrambling experiments have been performed.

**Scheme S44:** Iodination of m-cresol methyl ether (**1a**) with addition of p-iodotoluene (**3c**)

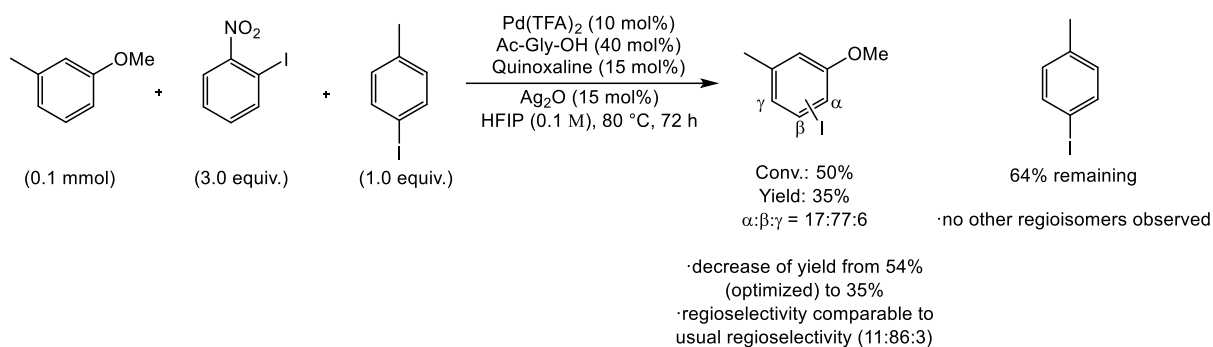

**Scheme S45:** Iodination of toluene (**1c**) with addition of iodinated m-cresole methyl ether **3a-α**.

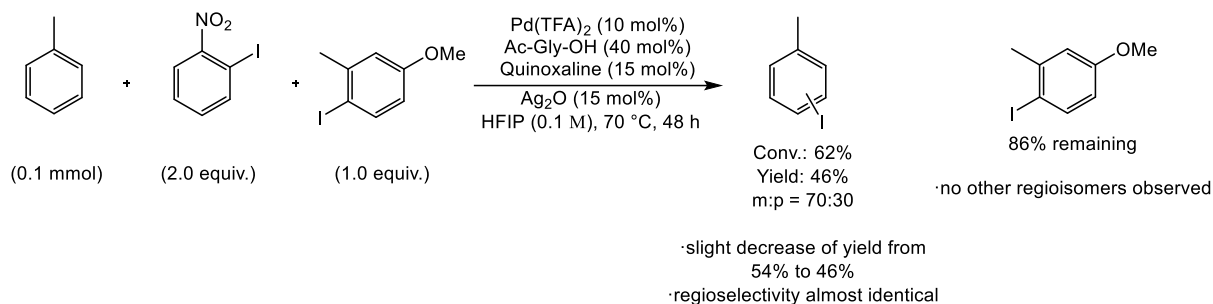

**Scheme S46:** Reaction subjecting toluene (**1c**) and meta- or para-iodotoluene (**3c**) to reaction conditions without I-Reagent **2**.

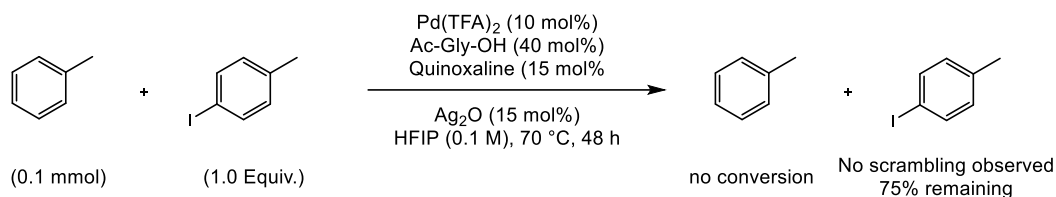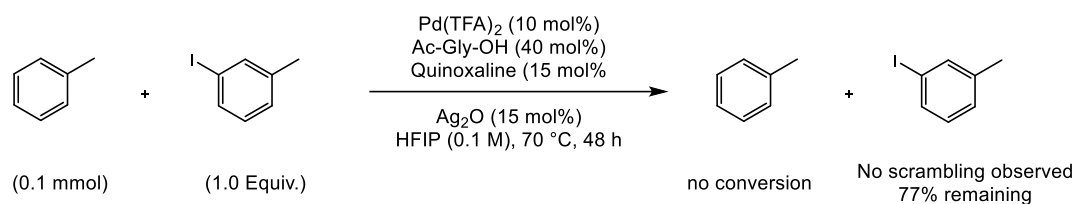

**Scheme S47:** Reaction subjecting *p*-iodotoluene (**3c**) to reaction conditions.

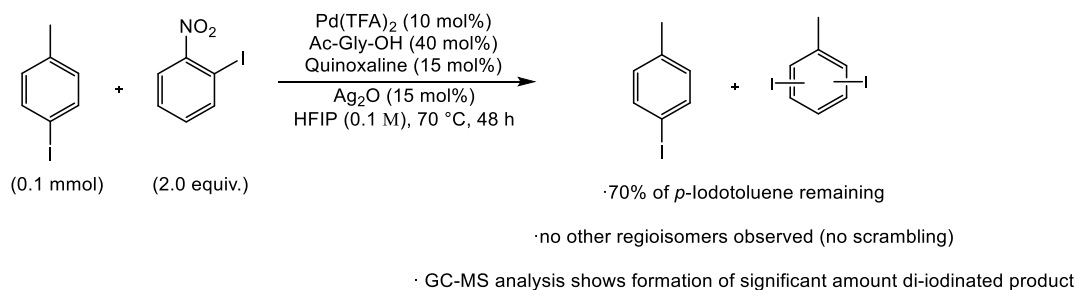

**Scheme S48:** Reaction subjecting iodinated *m*-cresol methyl ether **3a- $\alpha$**  to reaction conditions.

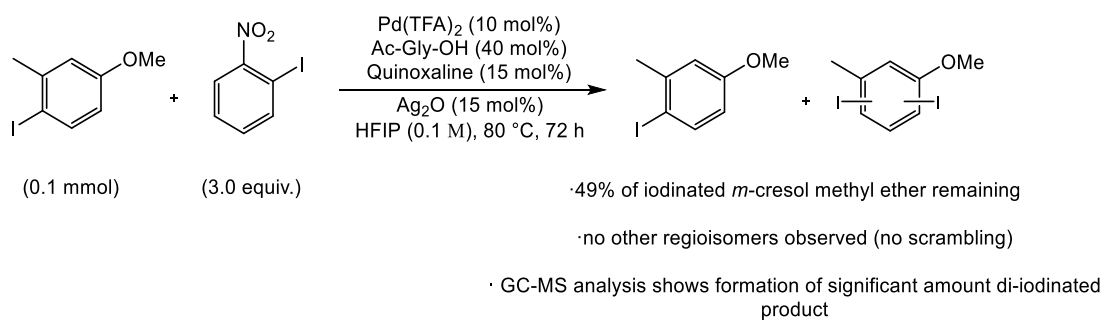

**Scheme S49:** Reaction subjecting mixture of iodinated product **3c** to reaction conditions.

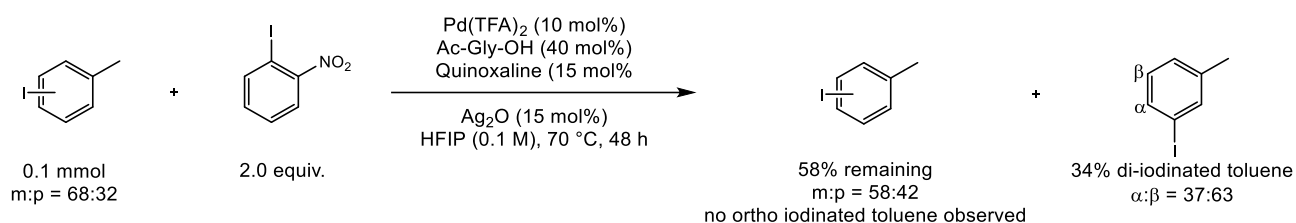

## Kinetic Isotope Experiments

Before performing the KIE studies, we began by monitoring the reaction of *o*-xylene (**1i**) over the course of the first 160 minutes, in order to determine the range in which initial rate data could be obtained.

**Scheme S50:** Reaction conditions for investigation of reaction course.

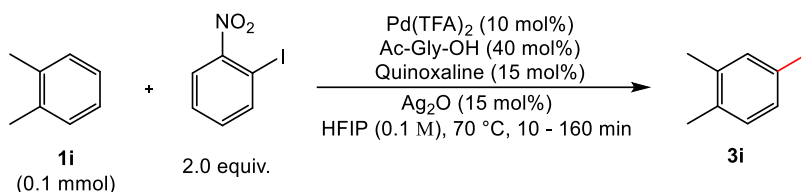

**Table 1.** Reaction analysis in the first 160 minutes using *o*-xylene.

| Entry | arene                              | reaction time (min) | conversion (%) | yield (%) | product (mmol) |
|-------|------------------------------------|---------------------|----------------|-----------|----------------|
| 1     | <i>ortho</i> -xylene ( <b>1i</b> ) | 10                  | 1.1            | 0.4       | 0.00035        |
| 2     | <i>ortho</i> -xylene ( <b>1i</b> ) | 20                  | 1.8            | 1.4       | 0.00143        |
| 3     | <i>ortho</i> -xylene ( <b>1i</b> ) | 40                  | 4.1            | 3.4       | 0.00346        |
| 4     | <i>ortho</i> -xylene ( <b>1i</b> ) | 80                  | 8.6            | 6.3       | 0.00635        |
| 5     | <i>ortho</i> -xylene ( <b>1i</b> ) | 160                 | 11.1           | 8.5       | 0.00843        |

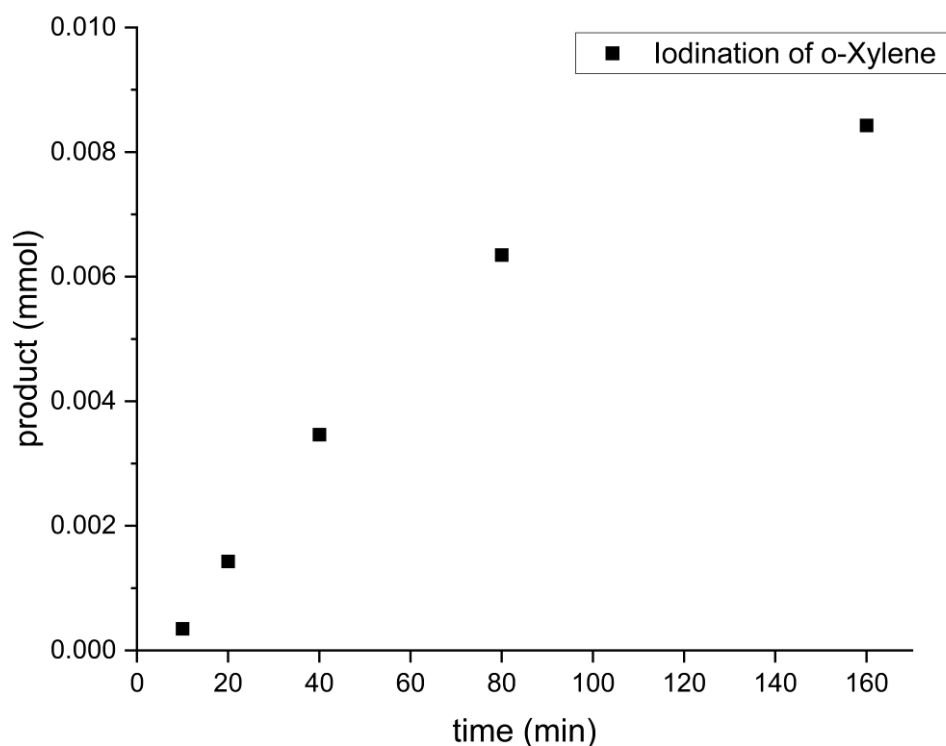

**Figure 1:** Reaction profile over the first 160 min with substrate **1i** to determine the linear range and establish the suitability of initial rate measurements for KIE studies. All reactions conducted with substrate (0.1 mmol), iodine reagent (2.0 equiv.), Ag<sub>2</sub>O (15 mol%) in HFIP (1.0 mL) at 70 °C.

The data in Figure 1 shows that for o-xylene (**1i**) parallel KIE studies can be performed using initial rate kinetic measurements with linear approximation, since no substantial induction period is observed, and the reaction shows a near linear kinetic behavior in the first 100 minutes of the reaction.

**Scheme S51:** Reaction conditions for parallel kinetic isotope experiments.

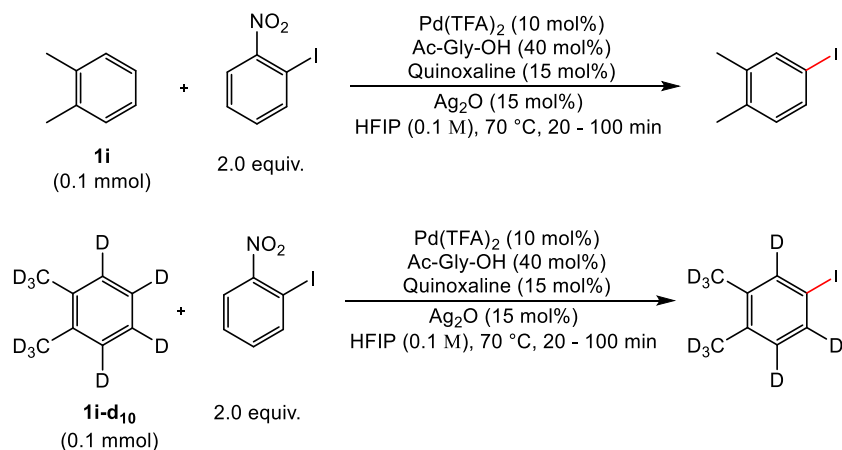

The initial rates for the parallel experiments were determined following the general procedure C. Deuterium kinetic isotope effects (KIEs) were determined by dividing the initial rate of **1i** ( $k_H$ ) by the initial rate of **1i-d<sub>10</sub>** ( $k_D$ ).

| Entry | arene                                                             | reaction time (min) | conversion (%) | yield (%) | product (mmol) |
|-------|-------------------------------------------------------------------|---------------------|----------------|-----------|----------------|
| 1     | <i>ortho</i> -xylene ( <b>1i</b> )                                | 20                  | 2.1            | 1.0       | 0.0010         |
| 2     | <i>ortho</i> -xylene ( <b>1i</b> )                                | 40                  | 3.4            | 3.0       | 0.0030         |
| 3     | <i>ortho</i> -xylene ( <b>1i</b> )                                | 60                  | 6.3            | 5.5       | 0.0054         |
| 4     | <i>ortho</i> -xylene ( <b>1i</b> )                                | 80                  | 7.8            | 6.1       | 0.0060         |
| 5     | <i>ortho</i> -xylene ( <b>1i</b> )                                | 100                 | 9.8            | 7.9       | 0.0079         |
| 6     | <i>ortho</i> -xylene-d <sub>10</sub> ( <b>1i-d<sub>10</sub></b> ) | 20                  | 0.9            | 0.3       | 0.0003         |
| 7     | <i>ortho</i> -xylene-d <sub>10</sub> ( <b>1i-d<sub>10</sub></b> ) | 40                  | 1.9            | 1.3       | 0.0013         |
| 8     | <i>ortho</i> -xylene-d <sub>10</sub> ( <b>1i-d<sub>10</sub></b> ) | 60                  | 2.8            | 2.0       | 0.0020         |
| 9     | <i>ortho</i> -xylene-d <sub>10</sub> ( <b>1i-d<sub>10</sub></b> ) | 80                  | 4.1            | 2.8       | 0.0028         |
| 10    | <i>ortho</i> -xylene-d <sub>10</sub> ( <b>1i-d<sub>10</sub></b> ) | 100                 | 6.1            | 4.1       | 0.0041         |

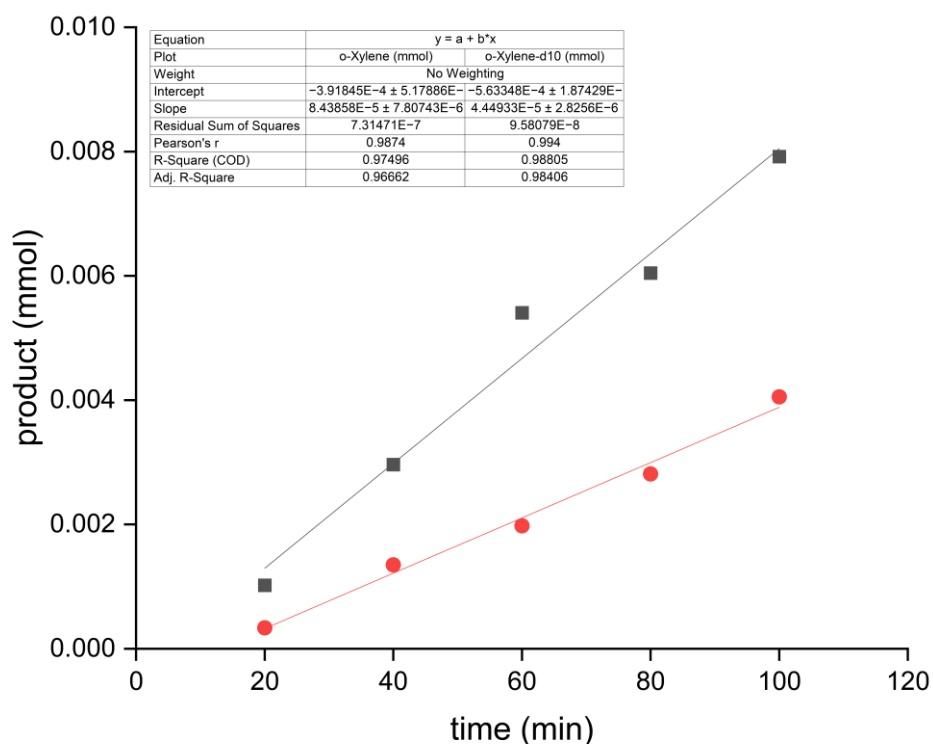

**Figure 2:** Plot of iodinated product (mmol) versus time (min) for *ortho*-xylene (**1i**) (black squares) and *ortho*-xylene-d<sub>10</sub> (**1i-d<sub>10</sub>**) (red circles).



**Equation:**  $KIE = \frac{k_H}{k_D} = \frac{8.44 \times 10^{-5} \pm 7.81 \times 10^{-6}}{4.45 \times 10^{-5} \pm 2.83 \times 10^{-6}} = 1.90 \pm 0.28$

**Scheme S52:** Reaction conditions for competition kinetic isotope experiments.

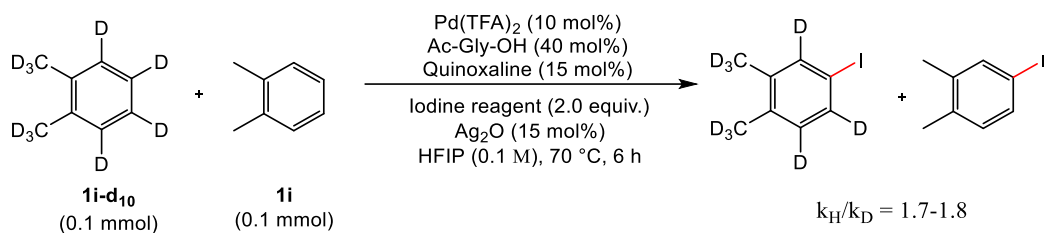

The initial rates for the competition experiments were determined following the general procedure C using *ortho*-xylene (**1i**) (10.6 mg, 0.100 mmol, 1.0 equiv.) and *ortho*-xylene-d<sub>10</sub> (**1i-d<sub>10</sub>**) (11.6 mg, 0.100 mmol, 1.0 equiv.) as the arene. The product ratio was determined by GC-FID analysis.

**Table 3.** Competition kinetic isotope experiments.

| Entry | arene                                                             | reaction time (min) | conversion (%) | yield (%) | product (mmol) |
|-------|-------------------------------------------------------------------|---------------------|----------------|-----------|----------------|
| 1     | <i>ortho</i> -xylene ( <b>1i</b> )                                | 6 h                 | 16.0           | 12.1      | 0.0119         |
| 2     | <i>ortho</i> -xylene-d <sub>10</sub> ( <b>1i-d<sub>10</sub></b> ) | 6 h                 | 7.2            | 6.8       | 0.0069         |

The kinetic isotope effects observed indicate that the C–H activation step is at least in part rate-limiting.

Following the general procedure A, using Ethyl benzoate **1h-d<sub>5</sub>** (15.5 mg, 0.100 mmol) as the arene, the reaction was stirred at 100 °C for the indicated time, cooled down in liquid nitrogen, and then allowed to warm to room temperature. The deuterium percentages for the starting material were calculated by mass spectrometric analysis using GC-MS and Universal Mass Calculator.<sup>1</sup>

Our H/D-exchange experiments demonstrate that the C–H activation is a reversible process, causing a substantial H/D exchange in the absence of the iodinating reagent (B). The degree of H/D exchange in remaining starting material is significantly reduced in the presence of the iodinating reagent (C). This indicates that the reversion of the C–H activation step, while in principle possible, is outcompeted by product formation under the reaction conditions.

**Scheme S53:** Reversibility experiments using deuterated Ethyl benzoate (**1h-d<sub>5</sub>**).

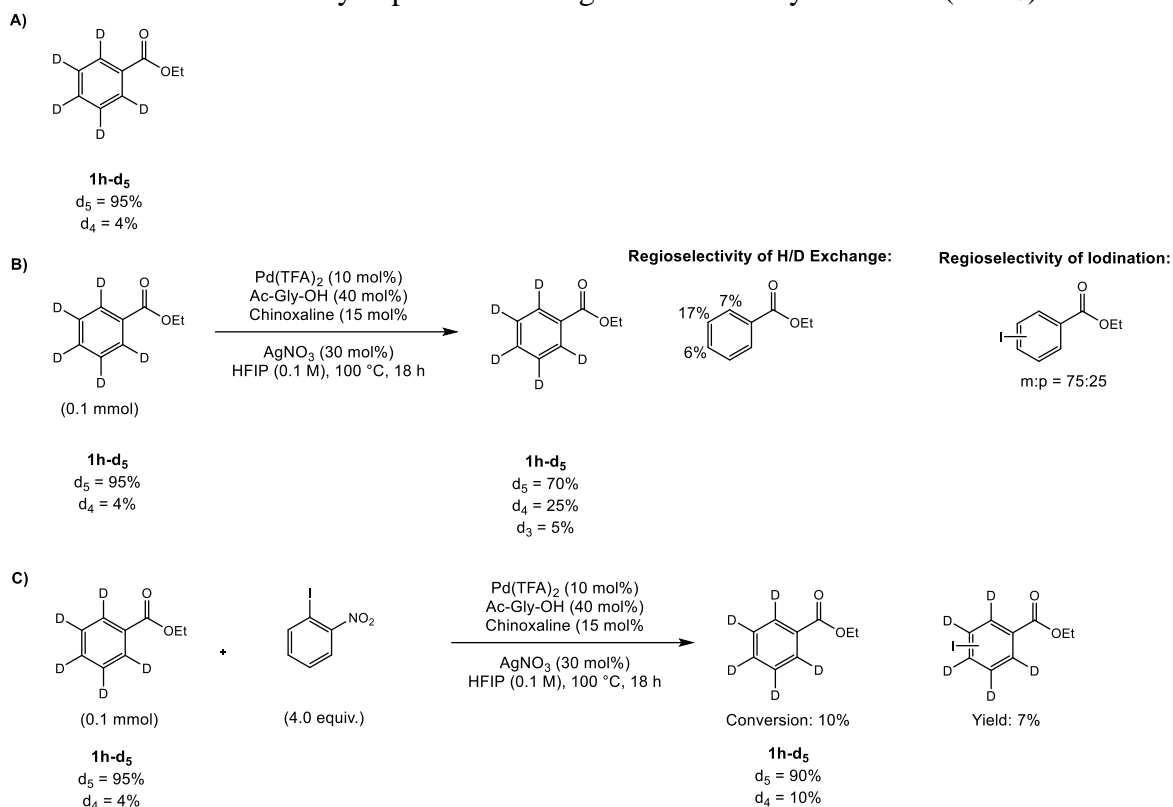

<sup>1</sup> The Universal Mass Calculator software package (V. 3.8.0.4) was developed by Dr. Matthias Letzel (WWU). The isotope pattern fitting was conducted with the module LabelChecker, which accounts for the natural abundance of all relevant isotopes.

A)

## LabelChecker Results

Formula: C7 H5 O  
Mass (monoisotopic): 105.03

Difference Value: 0.000688  
Error Sum: 0.026  
Error (%): 0.254

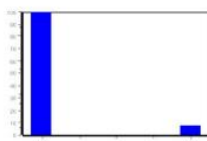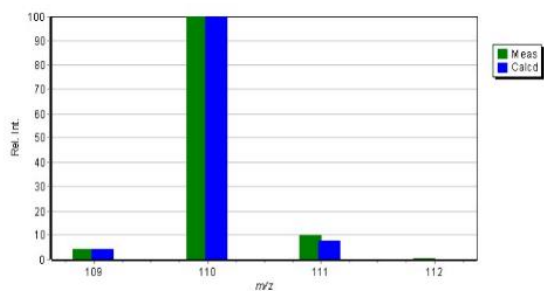

Deuterium: 0-fold (%): 0.00 0.00  
Deuterium: 1-fold (%): 0.00 0.00  
Deuterium: 2-fold (%): 0.04 0.03  
Deuterium: 3-fold (%): 0.15 0.14  
Deuterium: 4-fold (%): 4.05 4.43  
Deuterium: 5-fold (%): 100.00 95.39  
Label Atom Sum: 4.95 (99.04%)

Isotope List used for fitting data:

| m/z    | Intensity |
|--------|-----------|
| 107.00 | 98        |
| 108.00 | 423       |
| 109.00 | 12774     |
| 110.00 | 275053    |
| 111.00 | 28036     |
| 112.00 | 2379      |

B)

## LabelChecker Results

Formula: C7 H5 O  
Mass (monoisotopic): 105.03

Difference Value: 0.000376  
Error Sum: 0.019  
Error (%): 0.232

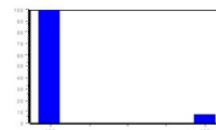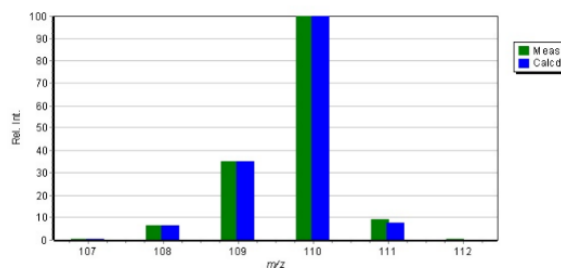

Deuterium: 0-fold (%): 0.03 0.02  
Deuterium: 1-fold (%): 0.13 0.09  
Deuterium: 2-fold (%): 0.84 0.58  
Deuterium: 3-fold (%): 6.79 4.73  
Deuterium: 4-fold (%): 35.79 24.93  
Deuterium: 5-fold (%): 100.00 69.65  
Label Atom Sum: 4.03 (92.68%)

Isotope List used for fitting data:

| m/z    | Intensity |
|--------|-----------|
| 105.00 | 42        |
| 106.00 | 209       |
| 107.00 | 1312      |
| 108.00 | 10620     |
| 109.00 | 56241     |
| 110.00 | 159144    |
| 111.00 | 15071     |
| 112.00 | 1276      |

C)

## LabelChecker Results

Formula: C7 H5 O  
Mass (monoisotopic): 105.03

Difference Value: 0.000490  
Error Sum: 0.022  
Error (%): 0.214

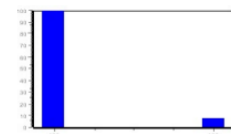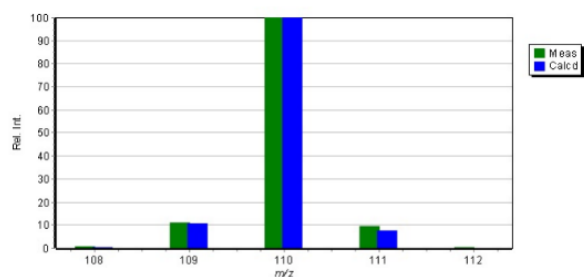

Deuterium: 0-fold (%): 0.00 0.00  
Deuterium: 1-fold (%): 0.02 0.02  
Deuterium: 2-fold (%): 0.00 0.00  
Deuterium: 3-fold (%): 0.79 0.70  
Deuterium: 4-fold (%): 10.89 9.75  
Deuterium: 5-fold (%): 100.00 89.53  
Label Atom Sum: 4.89 (97.75%)

Isotope List used for fitting data:

| m/z    | Intensity |
|--------|-----------|
| 105.00 | 249       |
| 106.00 | 272       |
| 107.00 | 391       |
| 108.00 | 3165      |
| 109.00 | 39693     |
| 110.00 | 361501    |
| 111.00 | 35316     |
| 112.00 | 2941      |

# <sup>1</sup>H of D5-Ethylbenzoate (1h-d5)

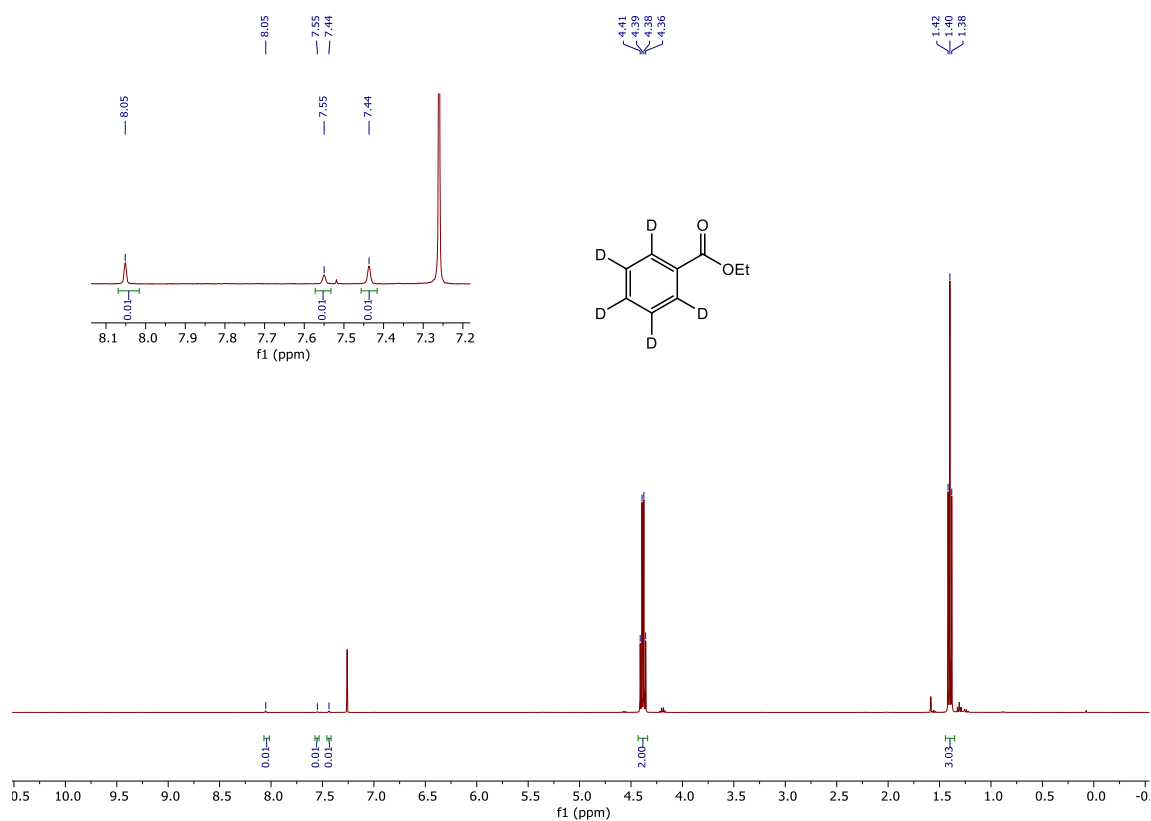

# <sup>1</sup>H of D5-Ethylbenzoate (1h-d5) after Reaction without I-Reagent

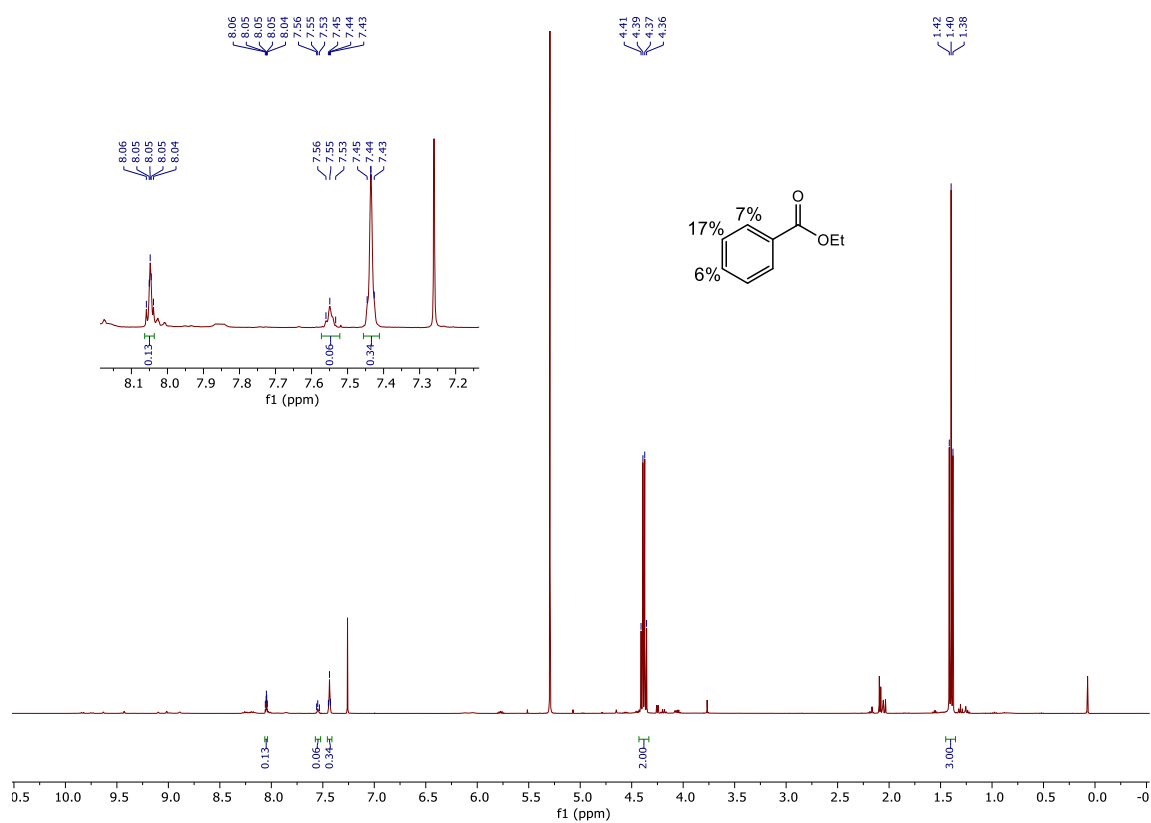

## Order in Arene

**Scheme S54:** Initial rate method to determine the order in *ortho*-xylene (**1i**).

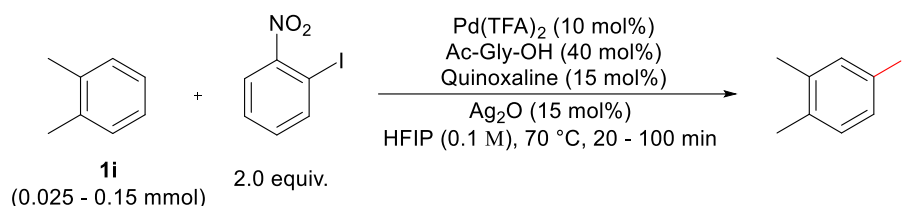

General reaction procedure C was used with the following modifications: The amount of *ortho*-xylene (**1i**) (3.25 - 18.4  $\mu$ L, 0.025 - 0.150 mmol, 0.25 - 1.50 equiv) was varied. The initial rates and the corresponding standard error were plotted as a function of concentration of the varied reagent. A non-linear least squares fit ( $y = A \cdot x^B$ ) was applied with  $y$  = initial rate,  $x$  = concentration of the varied reagent,  $A$  = rate constant and  $B$  = reaction order in varied reagent (**Figure 4**).<sup>13</sup>

**Table 4.** Initial rate method to determine the order in *ortho*-xylene (**1i**).

| Entry | Amount of <i>ortho</i> -xylene<br>( <b>1i</b> ) (mmol) | reaction<br>time (min) | yield<br>(%) <sup>[a]</sup> | product<br>(mmol) |
|-------|--------------------------------------------------------|------------------------|-----------------------------|-------------------|
| 1     | 0.025 mmol                                             | 20                     | 0.5%                        | 0.00047           |
| 2     | 0.025 mmol                                             | 40                     | 1.1%                        | 0.00108           |
| 3     | 0.025 mmol                                             | 60                     | 2.2%                        | 0.00216           |
| 4     | 0.025 mmol                                             | 80                     | 2.4%                        | 0.00240           |
| 5     | 0.025 mmol                                             | 100                    | 3.5%                        | 0.00349           |
| 6     | 0.05 mmol                                              | 20                     | 0.6%                        | 0.00064           |
| 7     | 0.05 mmol                                              | 40                     | 2.1%                        | 0.00208           |
| 8     | 0.05 mmol                                              | 60                     | 3.1%                        | 0.00305           |
| 9     | 0.05 mmol                                              | 80                     | 3.4%                        | 0.00338           |
| 10    | 0.05 mmol                                              | 100                    | 4.4%                        | 0.00436           |
| 11    | 0.1 mmol                                               | 20                     | 1.4%                        | 0.00137           |
| 12    | 0.1 mmol                                               | 40                     | 3.0%                        | 0.00299           |
| 13    | 0.1 mmol                                               | 60                     | 3.9%                        | 0.00385           |
| 14    | 0.1 mmol                                               | 80                     | 5.0%                        | 0.00496           |
| 15    | 0.1 mmol                                               | 100                    | 6.2%                        | 0.00620           |
| 16    | 0.125 mmol                                             | 20                     | 1.2%                        | 0.00121           |
| 17    | 0.125 mmol                                             | 40                     | 3.6%                        | 0.00355           |
| 18    | 0.125 mmol                                             | 60                     | 4.6%                        | 0.00460           |
| 19    | 0.125 mmol                                             | 80                     | 6.1%                        | 0.00614           |
| 20    | 0.125 mmol                                             | 100                    | 7.6%                        | 0.00759           |
| 21    | 0.15 mmol                                              | 20                     | 1.6%                        | 0.00156           |
| 22    | 0.15 mmol                                              | 40                     | 4.2%                        | 0.00420           |
| 23    | 0.15 mmol                                              | 60                     | 5.7%                        | 0.00574           |
| 24    | 0.15 mmol                                              | 80                     | 7.1%                        | 0.00708           |
| 25    | 0.15 mmol                                              | 100                    | 8.9%                        | 0.00888           |

[a] The yield has been normalized for an *ortho*-xylene (**1i**) amount of 0.1 mmol.

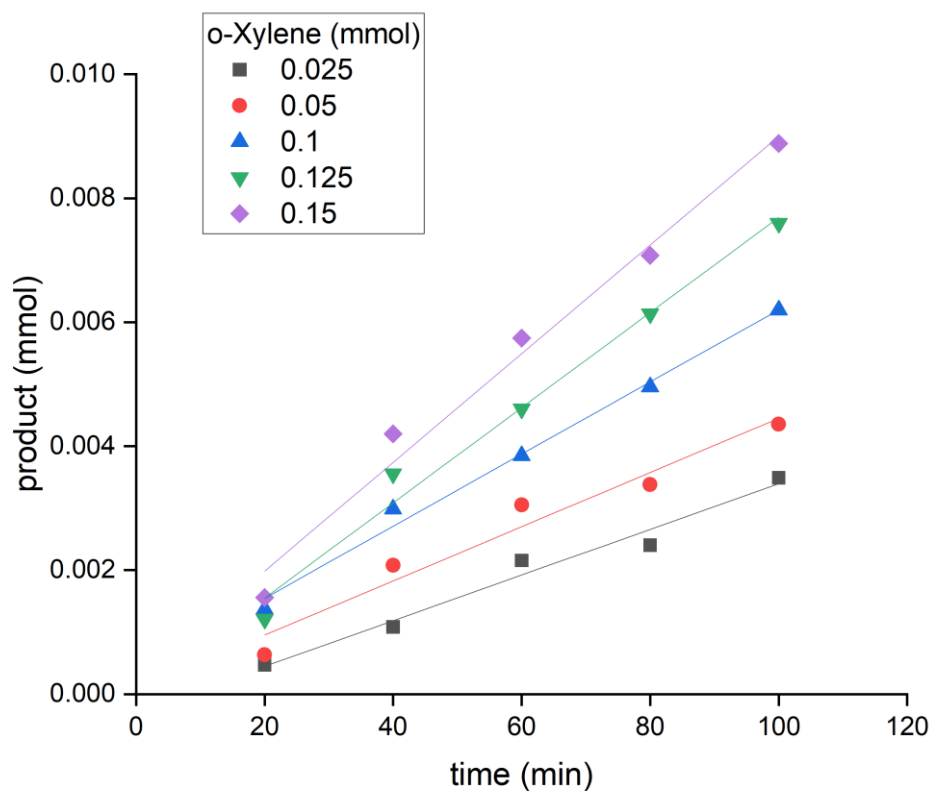

| Equation                | y = a + b*x            |                         |                         |                         |                         |
|-------------------------|------------------------|-------------------------|-------------------------|-------------------------|-------------------------|
| Plot                    | 0.025 mmol arene       | 0.05 mmol arene         | 0.1 mmol arene          | 0.125 mmol arene        | 0.15 mmol arene         |
| Weight                  | No Weighting           |                         |                         |                         |                         |
| Intercept               | -2.8571E-4 ± 2.2666E-4 | 7.81654E-5 ± 3.47405E-4 | 3.82404E-4 ± 2.05307E-4 | 1.4678E-5 ± 3.53507E-4  | 2.32756E-4 ± 4.27625E-4 |
| Slope                   | 3.67843E-5 ± 3.4171E-6 | 4.37171E-5 ± 5.23732E-6 | 5.81708E-5 ± 3.09512E-6 | 7.67488E-5 ± 5.32932E-6 | 8.76537E-5 ± 6.44669E-6 |
| Residual Sum of Squares | 1.40119E-7             | 3.29155E-7              | 1.14957E-7              | 3.40819E-7              | 4.98718E-7              |
| Pearson's r             | 0.9873                 | 0.97914                 | 0.99578                 | 0.99284                 | 0.99198                 |
| R-Square (COD)          | 0.97476                | 0.95872                 | 0.99158                 | 0.98574                 | 0.98403                 |
| Adj. R-Square           | 0.96635                | 0.94496                 | 0.98877                 | 0.98099                 | 0.97871                 |

**Figure 3:** Plot of product (mmol) versus time (min) following general reaction procedure C with linear fits for arene = 0.025 mmol (black), 0.05 mmol (red), 0.1 mmol (blue), 0.125 mmol (green), and 0.15 mmol (pink).

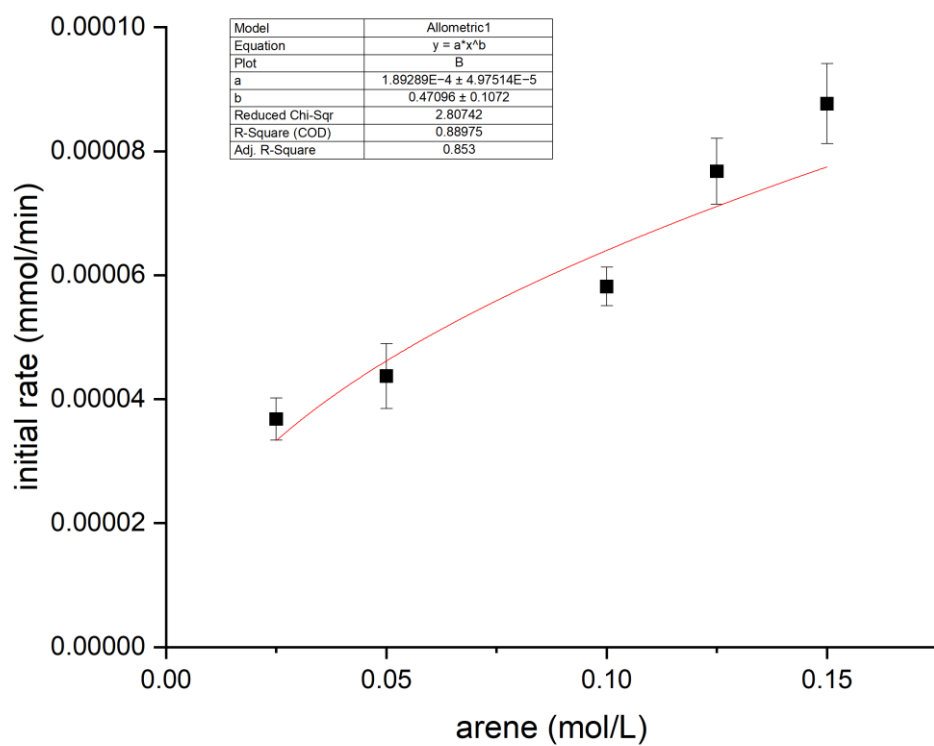

**Figure 4:** Plot of initial rate (mmol/min) versus arene (mmol) with exponential fit to  $y = a \cdot x^b$  where  $b$  = reaction order.

## Order in I-Reagent

**Scheme S55:** Initial rate method to determine the order in iodinating reagent.

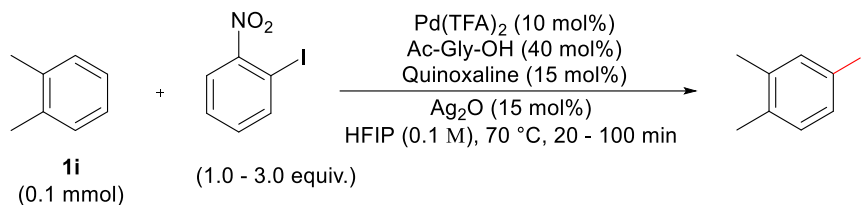

General reaction procedure C was used with the following modifications: The amount of I-Reagent (24.9 – 74.7 mg, 0.1 - 0.3 mmol, 1.00 – 3.00 equiv) was varied.

**Table 5.** Initial rate method to determine the order in iodinating reagent.

| Entry | Amount of I-Reagent<br>(mmol) | reaction<br>time (min) | yield<br>(%) <sup>[a]</sup> | product<br>(mmol) |
|-------|-------------------------------|------------------------|-----------------------------|-------------------|
| 1     | 0.1 mmol                      | 20                     | 0.6%                        | 0,00062           |
| 2     | 0.1 mmol                      | 40                     | 2.1%                        | 0,00210           |
| 3     | 0.1 mmol                      | 60                     | 3.3%                        | 0,00325           |
| 4     | 0.1 mmol                      | 80                     | 4.2%                        | 0,00415           |
| 5     | 0.1 mmol                      | 100                    | 5.5%                        | 0,00549           |
| 6     | 0.15 mmol                     | 20                     | 0.8%                        | 0,00077           |
| 7     | 0.15 mmol                     | 40                     | 2.0%                        | 0,00204           |
| 8     | 0.15 mmol                     | 60                     | 3.3%                        | 0,00325           |
| 9     | 0.15 mmol                     | 80                     | 4.4%                        | 0,00443           |
| 10    | 0.15 mmol                     | 100                    | 5.8%                        | 0,00583           |
| 11    | 0.2 mmol                      | 20                     | 1.1%                        | 0,00108           |
| 12    | 0.2 mmol                      | 40                     | 3.2%                        | 0,00324           |
| 13    | 0.2 mmol                      | 60                     | 4.8%                        | 0,00479           |
| 14    | 0.2 mmol                      | 80                     | 5.6%                        | 0,00562           |
| 15    | 0.2 mmol                      | 100                    | 7.1%                        | 0,00707           |
| 16    | 0.25 mmol                     | 20                     | 1.0%                        | 0,00104           |
| 17    | 0.25 mmol                     | 40                     | 3.3%                        | 0,00326           |
| 18    | 0.25 mmol                     | 60                     | 3.8%                        | 0,00378           |
| 19    | 0.25 mmol                     | 80                     | 5.7%                        | 0,00573           |
| 20    | 0.25 mmol                     | 100                    | 6.1%                        | 0,00608           |
| 21    | 0.3 mmol                      | 20                     | 1.6%                        | 0,00156           |
| 22    | 0.3 mmol                      | 40                     | 3.8%                        | 0,00375           |
| 23    | 0.3 mmol                      | 60                     | 5.7%                        | 0,00569           |
| 24    | 0.3 mmol                      | 80                     | 6.4%                        | 0,00639           |
| 25    | 0.3 mmol                      | 100                    | 7.3%                        | 0,00732           |



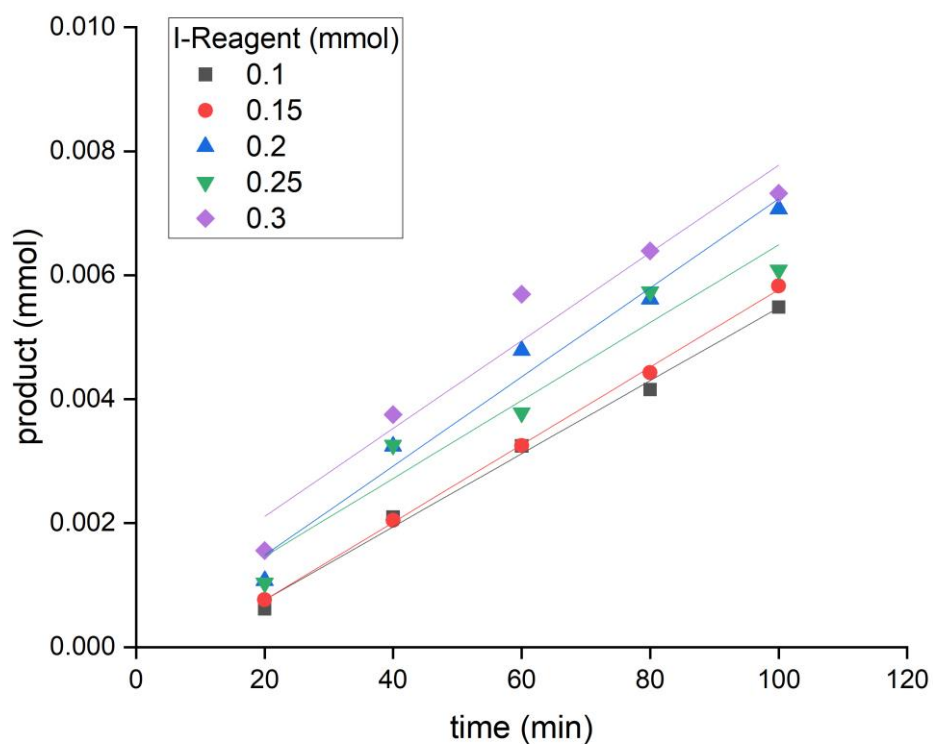

| Equation                | y = a + b*x             |                          |                         |                         |                         |
|-------------------------|-------------------------|--------------------------|-------------------------|-------------------------|-------------------------|
| Plot                    | 1.0 equiv. I-Reagent    | 1.5 equiv. I-Reagent     | 2.0 equiv. I-Reagent    | 2.5 equiv. I-Reagent    | 3.0 equiv. I-Reagent    |
| Weight                  | No Weighting            |                          |                         |                         |                         |
| Intercept               | -4,1711E-4 ± 1,74378E-4 | -4,89455E-4 ± 6,63917E-5 | 4,89267E-5 ± 4,335E-4   | 2,09273E-4 ± 5,82792E-4 | 6,94894E-4 ± 6,42144E-4 |
| Slope                   | 5,89567E-5 ± 2,62885E-6 | 6,25645E-5 ± 1,00089E-6  | 7,18296E-5 ± 6,53526E-6 | 6,28169E-5 ± 8,78592E-6 | 7,08304E-5 ± 9,68069E-6 |
| Residual Sum of Squares | 8,29302E-8              | 1,20214E-8               | 5,12515E-7              | 9,26309E-7              | 1,12459E-6              |
| Pearson's r             | 0,99703                 | 0,99962                  | 0,98781                 | 0,97189                 | 0,97311                 |
| R-Square (COD)          | 0,99407                 | 0,99923                  | 0,97577                 | 0,94457                 | 0,94693                 |
| Adj. R-Square           | 0,99209                 | 0,99898                  | 0,96769                 | 0,92609                 | 0,92925                 |

**Figure 5:** Plot of product (mmol) versus time (min) following general reaction procedure C with linear fits for I-Reagent = 0.10 mmol (black), 0.15 mmol (red), 0.20 mmol (blue), 0.25 mmol (green), and 0.30 mmol (pink).

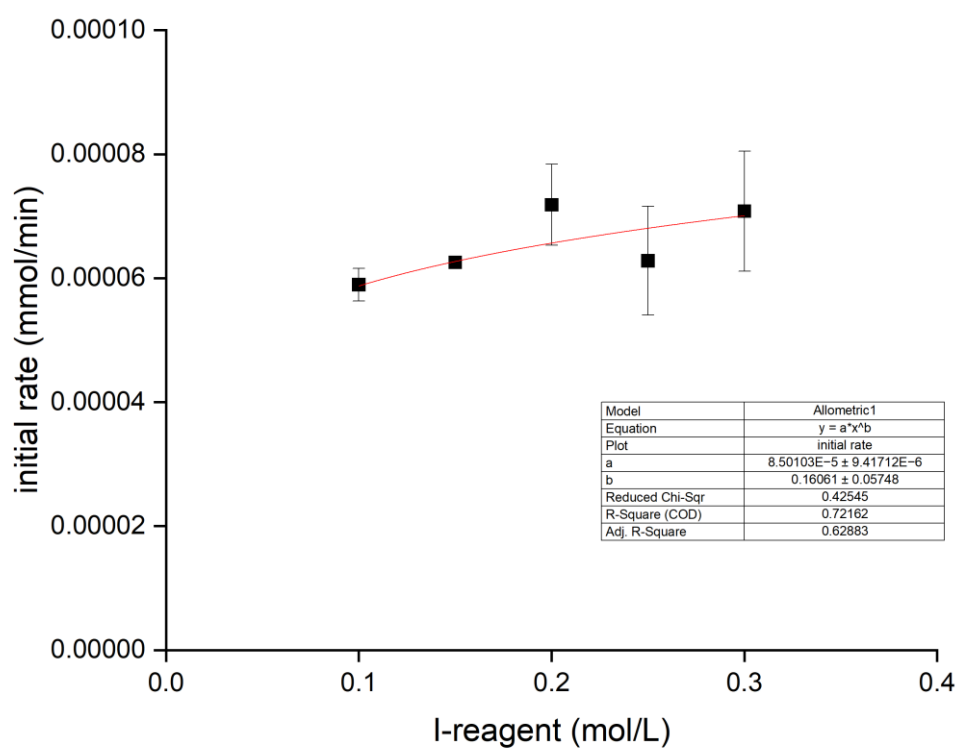

**Figure 6:** Plot of initial rate (mmol/min) versus I-reagent (mmol) with exponential fit to  $y = a \cdot x^b$  where  $b$  = reaction order.

## GC-MS traces: Iodination of 1-methoxy-3-methylbenzene (1a) and toluene (1c)

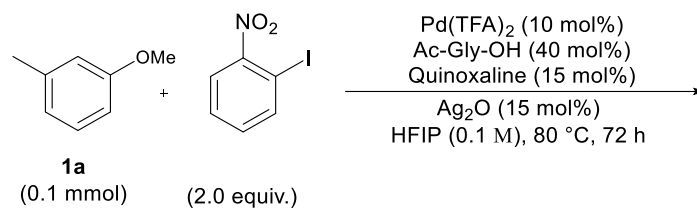

## 1-iodo-2-methoxy-4-methylbenzene (3a- $\alpha$ ), 1-iodo-3-methoxy-5-methylbenzene (3a- $\beta$ ) and 1-iodo-4-methoxy-2-methylbenzene (3a- $\gamma$ ): GC-MS trace of crude reaction mixture

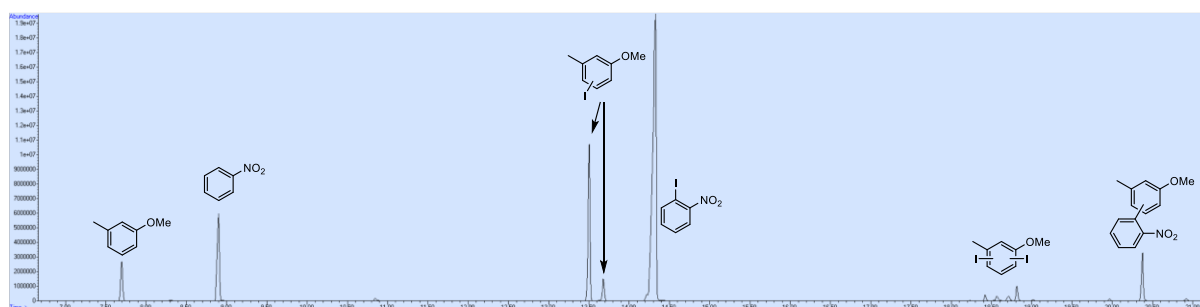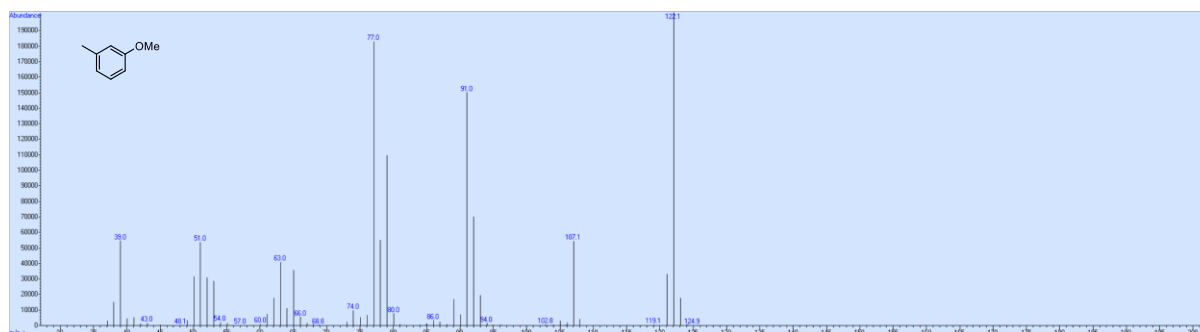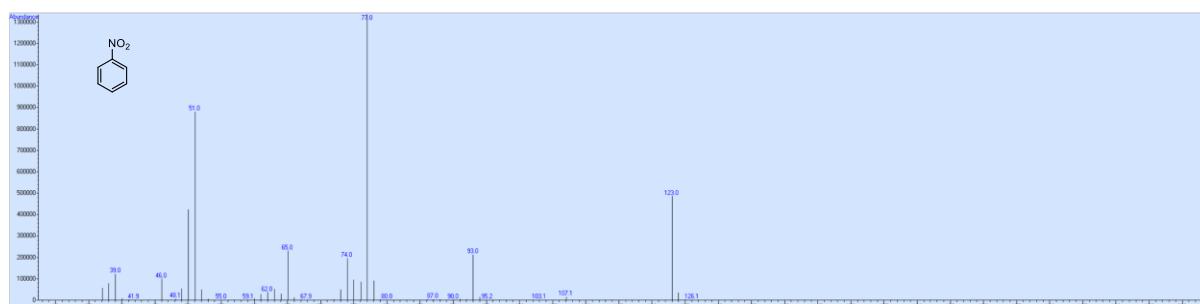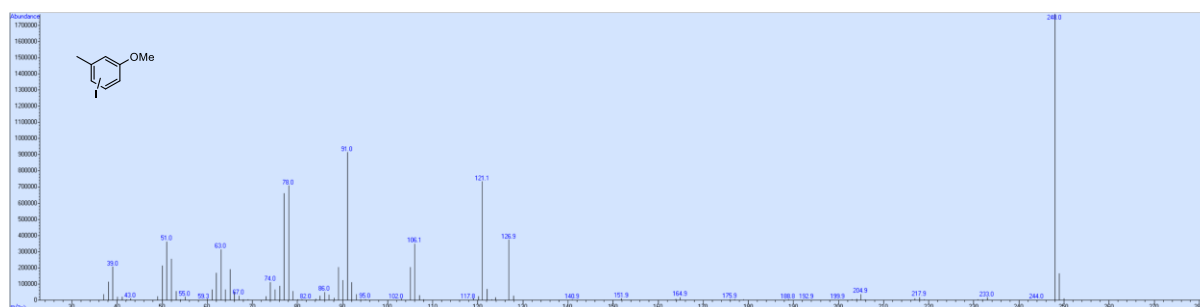

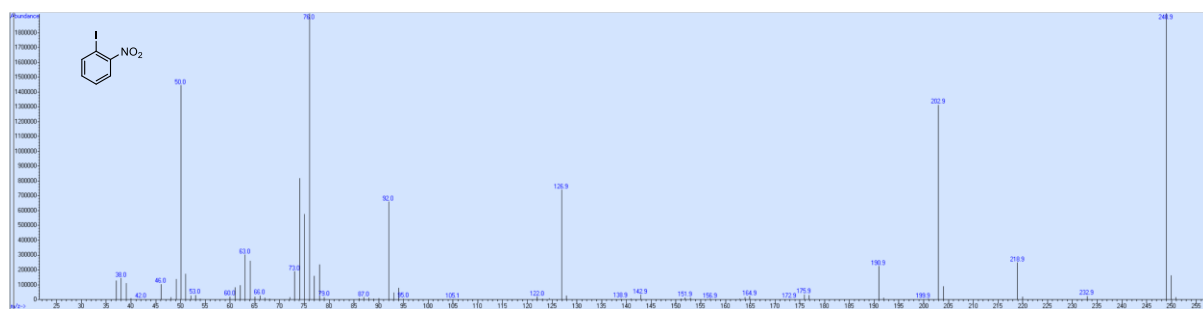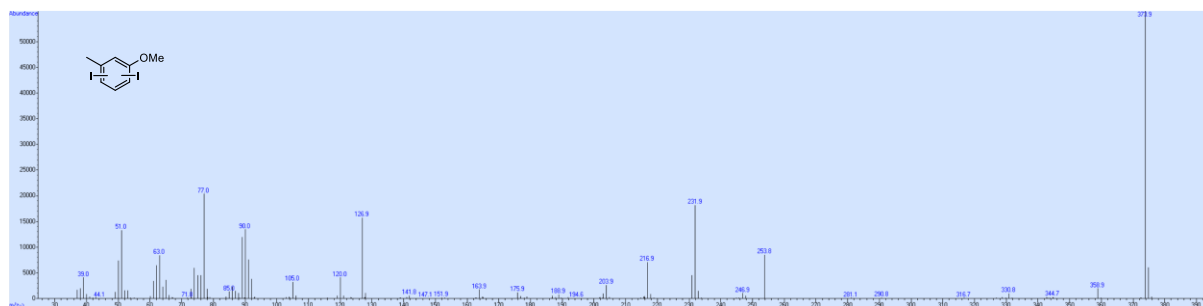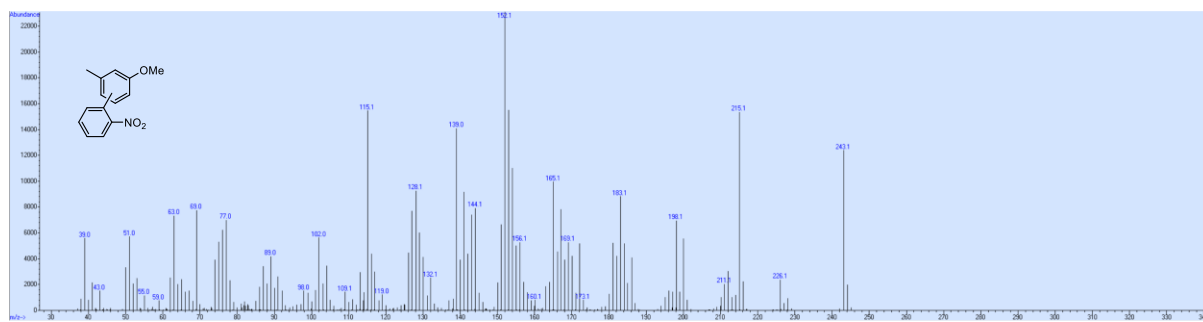

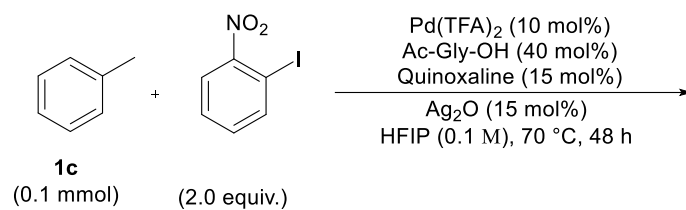

**1-iodo-3-methylbenzene (3c-meta) and 1-iodo-4-methylbenzene (3c-para): GC-MS trace of crude reaction mixture**

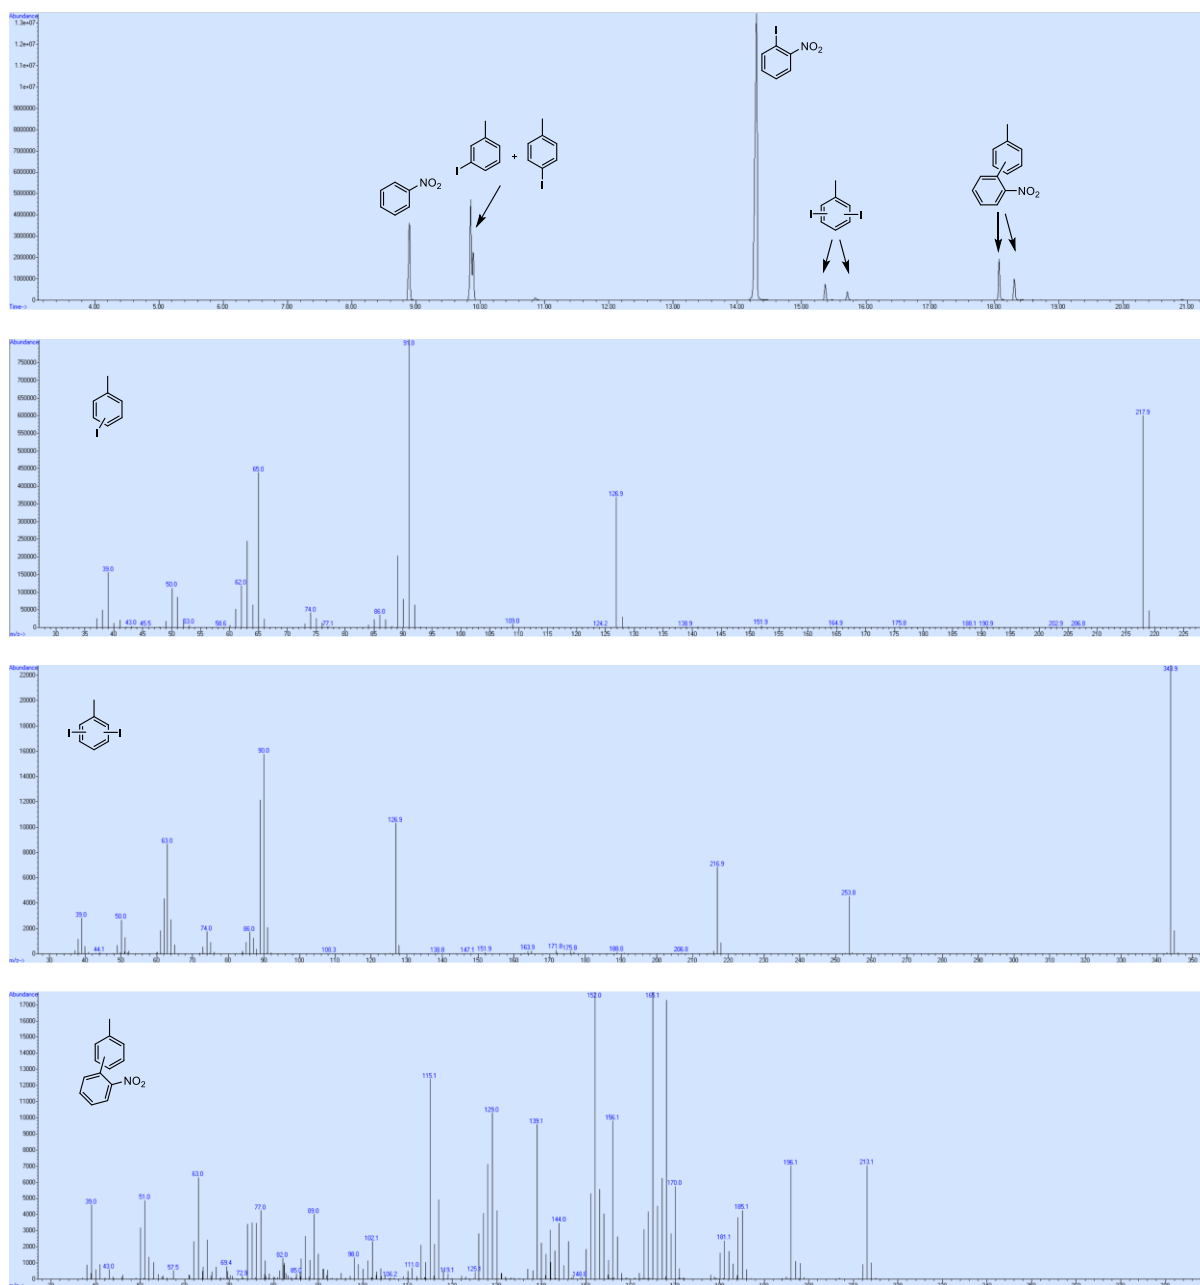

## Expanded mechanistic discussion

In order to elucidate whether the product formation is kinetically or thermodynamically controlled, scrambling experiments were performed. Note: The schemes from the scrambling experiments above have been included for clarity reasons.

We started our investigation with the reaction of substrates **1a** and **1c** under the respective optimized reaction conditions using 1-iodo-2-nitrobenzene (**2**) (Schemes **S44** and **S45**).

In each case we added an isomerically pure iodinated arene (**p-3c** in Scheme **S44** and  **$\gamma$ -3a** in **S45**) derived from another substrate. Importantly, this experimental setup guarantees that the reaction is ongoing and that thus the catalytically active species are proven to be formed. This is evidenced by the formation of the expected product with comparable yields and selectivities as without the added aryl iodide. Note: A thermodynamically controlled reaction would imply that the regioselectivities obtained in our scope studies are the result of an equilibrium in which all product regioisomers can be converted into the other regioisomers by intermediately being converted back to the starting material. Consequently, the added isomerically pure aryl iodides should likewise be converted into regioisomeric mixtures with the same ratios observed during the scope studies. Specifically, in **S44** meta-iodotoluene is expected to form in large quantities. Likewise, the addition of  **$\gamma$ -3a** in **S45** should result in the formation of the other more stable isomers  **$\alpha$ -3a** and  **$\beta$ -3a**.

**Scheme S44:** Iodination of m-cresol methyl ether (**1a**) with addition of p-iodotoluene (**3c**)

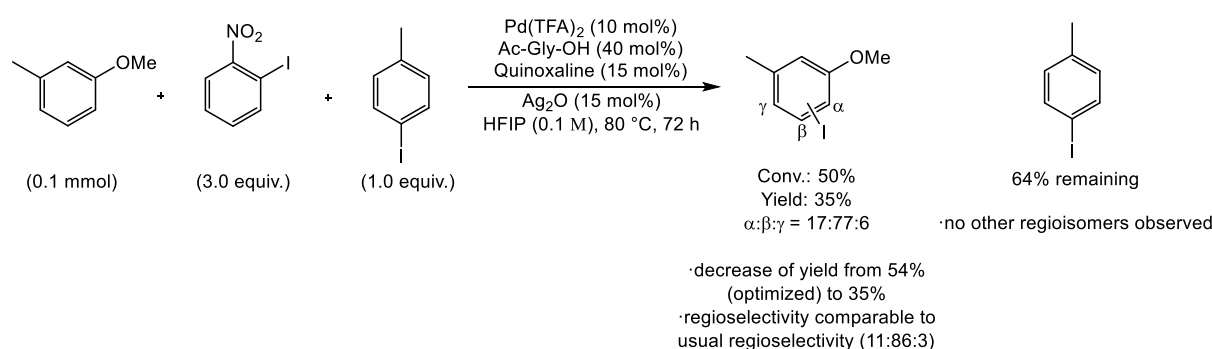

**Scheme S45:** Iodination of toluene (**1c**) with addition of iodinated m-cresol methyl ether **γ-3a**.

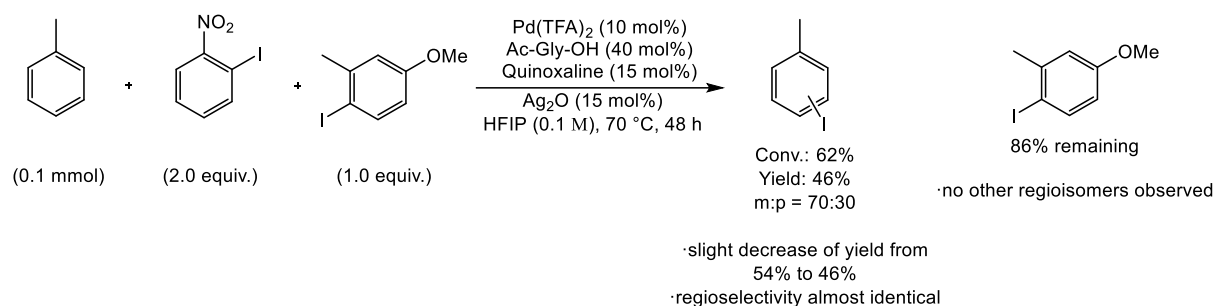

However, while the iodination of the arenes **1a** (S43) and **1c** (S44) delivered the respective iodinated arenes with almost identical results to the scope studies, the GC-FID analysis of these reactions showed no isomerization of the added iodoarenes. This observation allows to exclude an equilibrium between products and starting materials under our reaction conditions, thereby also ruling out a thermodynamically controlled process.

To further corroborate to this conclusion, we performed reactions where we subjected toluene (**1c**) along with either *para*-iodotoluene (**p-3c**) or *meta*-iodotoluene (**m-3c**) to the reaction conditions (Scheme S46). This reaction design would demonstrate if the catalyst system is capable of inducing a reversible reaction in the absence of iodine reagent **2** leading to a regioisomeric mixture of meta- and para-iodotoluene.

**Scheme S46:** Reaction subjecting toluene (**1c**) and meta- or para-iodotoluene (**3c**) to reaction conditions without I-Reagent **2**.

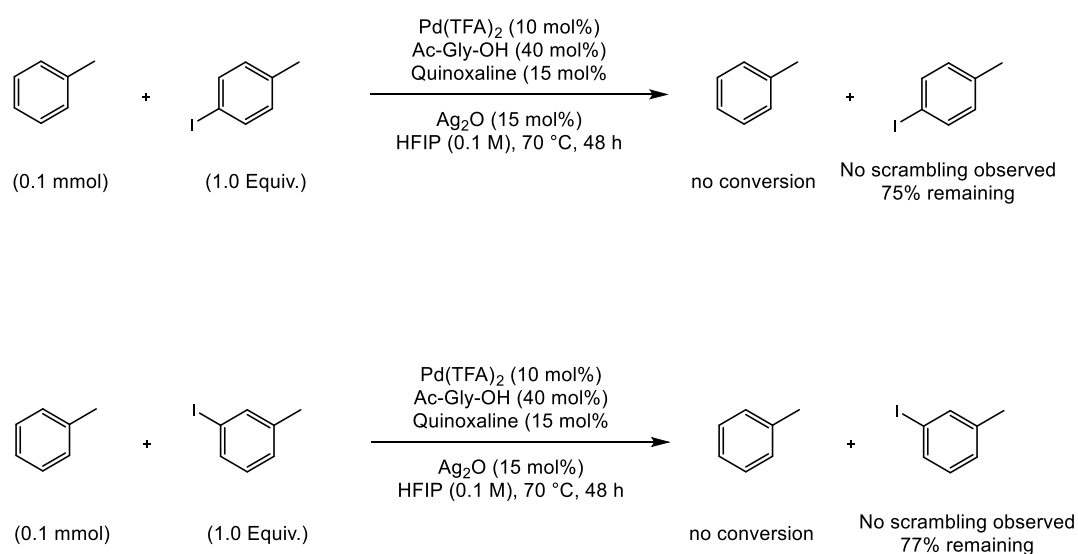

An analysis of the crude reaction mixture did not show any signs of scrambling of the iodine atom to other positions in the arene. Most of the aryl iodide remained unconverted.

To further investigate the reaction with regards to the presence of a possible equilibrium of isomers, isomerically pure molecules **p-3c** and  **$\gamma$ -3a** were subjected to the reaction conditions with iodine reagent **2** to identify whether these reaction conditions would induce an equilibration between the aryl iodide isomers (Schemes **S47** and **S48**).

**Scheme S47:** Reaction subjecting *p*-iodotoluene (**3c**) to reaction conditions.

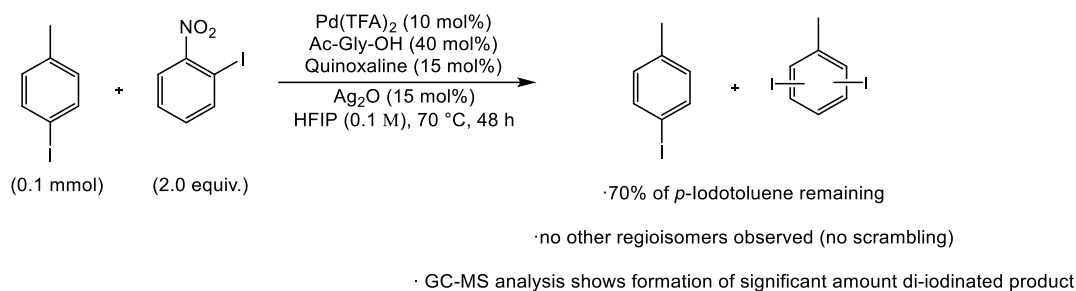

**Scheme S48:** Reaction subjecting iodinated *m*-cresol methyl ether  **$\gamma$ -3a** to reaction conditions.

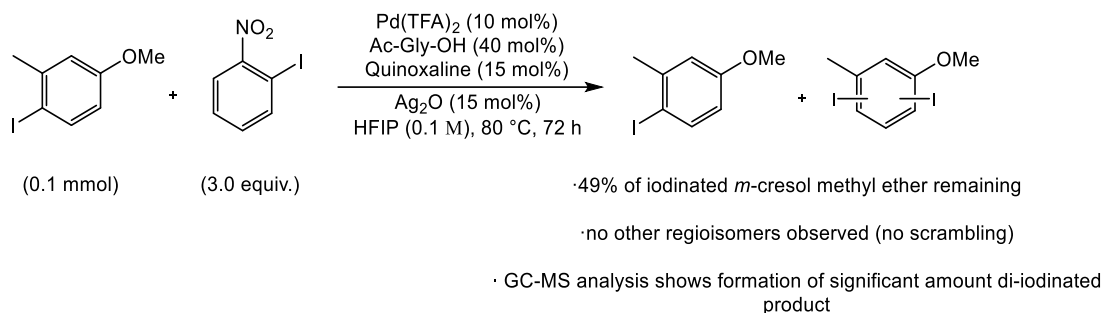

Other regioisomers of the respective iodoarenes were not observed. However, we could observe that di-iodination can occur and consume some of the starting aryl iodide. In addition to these experiments a product mixture of *m*:*p* = 68:32 resulting from the iodination of toluene (**1c**) was subjected to the reaction conditions (Scheme **S49**). The formation of *ortho*-iodinated toluene as well as a variation of the isomeric distribution would suggest the presence of an equilibrium with the formation of *ortho* iodinated product being kinetically slower.



**Scheme S49:** Reaction subjecting mixture of iodinated product **3c** to reaction conditions.

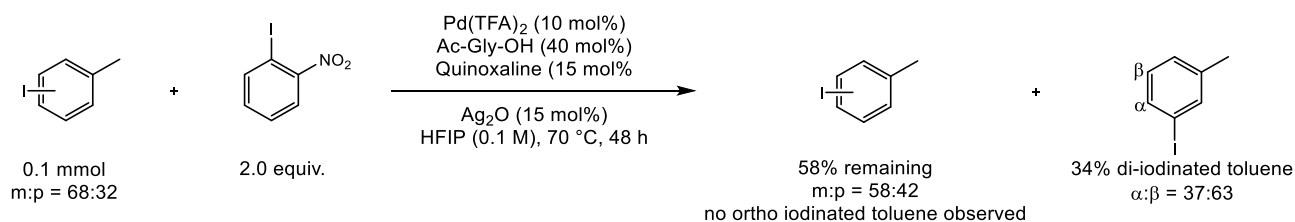

A thorough analysis of the reaction outcome showed that a significant amount of the product mixture **3c** was further iodinated to diiodinated toluene either forming 3,5- or 3,4-diiodinated toluene. This caused the variation of isomeric distribution of mixture **3c**. No ortho iodinated toluene was formed.

In summary, the lack of equilibria as well as the preservation of added isomerically pure iodoarenes unambiguously excludes a thermodynamically controlled process, conversely demonstrating that the process is kinetically controlled.

Having stated the nature of this reaction being kinetically controlled, at least one of the mechanistic steps must be irreversible (Scheme **S56**).

We therefore started to investigate the reversibility of the reaction steps as well as their analysis as to whether they are selectivity and/or rate determining.

**Scheme S56:** Possible mechanism of the isodesmic C–H iodination.

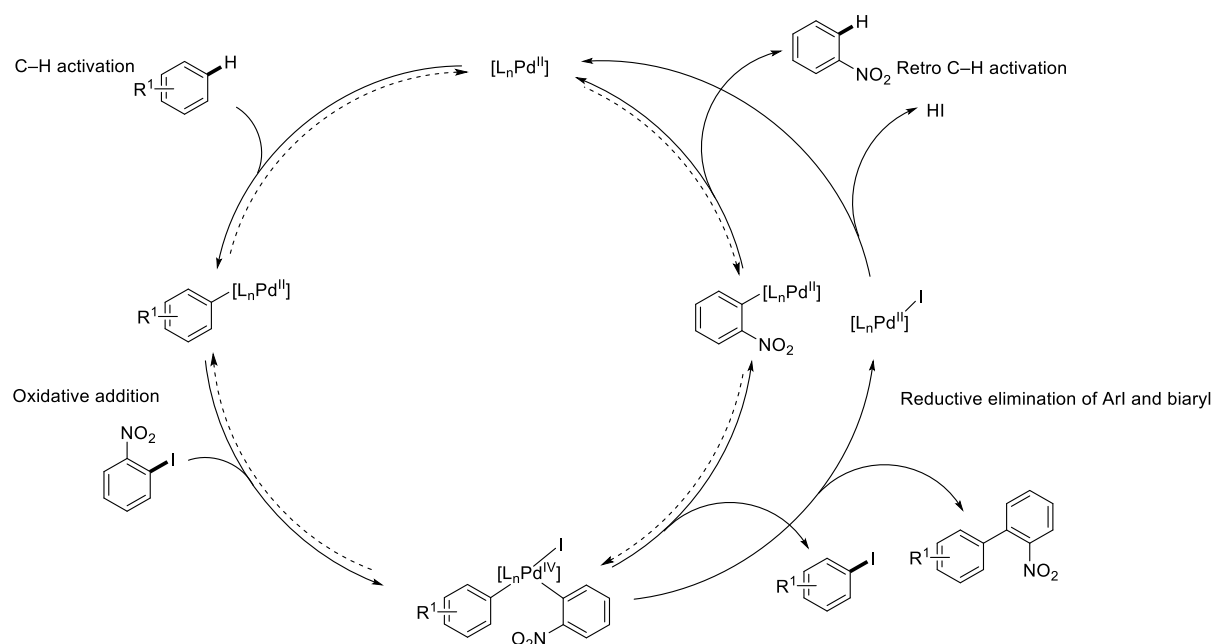

By inspecting the above scrambling experiments, it can be seen that under the reaction conditions and related conditions, the C–H activation of simple arenes is possible. Likewise the

reductive elimination from an intermediate Pd(IV) species with two aryl substituents and an iodide ligand must be feasible as evidenced by the product formation. Consequently, the absence of scrambling in all of the above cases can only be explained by the conclusion that our catalyst system does not engage in an oxidative addition with simple aryl iodides under the reaction conditions while the oxidative addition can occur with reagent **2**, in which this step is particularly favored, thus rendering the overall process unidirectional (Note: Iodoarenes with an electron-withdrawing substituent in ortho position like the iodine reagent **2** used in this transformation are known for their ease of OA on a Pd(II) complex leading to a Pd(IV) species<sup>14</sup>).

This leads to the identification of the reductive elimination as an irreversible step of our catalytic cycle. Additionally, the subsequent retro-C–H activation to give nitrobenzene is expected to be irreversible, since our previous studies have shown that our catalysts do not engage in the C–H activation of such very electron-poor substrates.

The investigation of the turnover-limiting step(s) and the selectivity determining step(s) will be discussed separately:

#### 1) Turnover-limiting step(s)

KIE (kinetic isotope effect) experiments were performed using o-xylene (**1i**) and deuterated o-xylene (**1i-d<sub>10</sub>**) indicating that the C–H activation step is at least in part turnover-limiting (parallel KIE =  $1.9 \pm 0.3$ , competition KIE = 1.7-1.8). Reversibility experiments using deuterated ethylbenzoate (**1h-d<sub>5</sub>**) confirm that the C–H activation step is in principle reversible, but that substantially less retro-C–H activation occurs in the presence of reagent, when product formation is feasible. To gain further insight regarding the turnover-limiting step(s), kinetic orders with respect to arene **1i** (0.5) and iodine reagent **2** (0.2) were determined suggesting that the C–H activation step is the main but not the only turnover-limiting step.

Fractional orders indicate that several steps are close to one another in energy barrier and thus contribute to the overall rate. The order in arene confirms that the C–H activation is one of the steps with the highest activation barrier, but that further steps with competitively high barriers exist in the overall cycle. The order of 0.2 in reagent **2** indicates that either the oxidative addition (OA) of the iodine reagent or the reductive elimination (RE) leading to the iodinated product also contribute to the overall rate. These two steps constitute analogous reactions and, when seen from the perspective of the Pd(IV)-intermediate, are two analogous REs. Considering that reagent **2** is particularly prone to undergo OA, the reverse will conversely be disfavored. In contrast, our experiments show that the OA of simple aryl iodides does not occur, rendering the

reverse RE a highly favorable step. Considering the Bell-Evans-Polanyi principle, the more favorable of two analogous reactions is expected to have the lower barrier. Thus, the RE step of our process is expected to be lower in activation energy than the retro-OA. For this reason, once the Pd(IV)-intermediate has formed, it is expected to proceed to product formation rather than reverting back to the C–H-activated substrate. This leads to the conclusion that the OA step of our catalytic cycle occurs irreversibly, since the subsequent steps are lower in activation barrier. Overall, based on our experimental data and concepts from basic physical organic chemistry, we can conclude that the C–H activation and oxidative addition steps are the turnover-limiting steps of our catalytic cycle.

## 2) Selectivity determining step(s)

Reversibility experiments were performed using deuterated substrate **1h-d<sub>5</sub>** and subjecting it to the reaction conditions with and without iodine reagent **2**. Significant H/D exchange occurred omitting reagent **2** which indicates the reversibility of the C–H activation step. The regioselectivity of the de-deuteration proves deuterium loss also in the ortho position of **1h-d<sub>5</sub>** which demonstrates that the ortho position can undergo C–H activation using our catalyst system. This observation suggests that ortho iodination is most likely suppressed in the following steps.

The meta- and para C–H activated species presumably undergo OA with iodine reagent **2** faster than the ortho C–H activated species, allowing the latter to equilibrate back to the starting material and undergo C–H activation in another position. Another important factor regarding the regioselectivity of the iodination process is, that biaryls form as by-products (see SI pp. 181-183). Once the key Pd(IV) intermediate has formed, its regioisomeric forms could vary in their preference for aryl iodide formation vs. biaryl formation. In this sense, the reductive elimination step inherently contributes to the observed overall selectivity. For ortho-C–H activated intermediates it can furthermore be conceived that the barrier for the RE could become similar to the one of the retro-OA, thus allowing some ortho-C–H activated compound to return to the substrate and undergo C–H activation in another position. It should be noted that the comparison of regioselectivities between the deuterium-labelling experiments and the iodination of ethyl benzoate show the same m:p ratio, such that the above effects likely contribute to suppressing the formation of sterically hindered isomers, but do not seem to exert an influence on the ratio between varied sterically accessible positions, in which the C–H activation seems to be the dominant source of selectivity. Finally it should be noted that the observed selectivities closely resemble the regioselectivities observed with our catalyst system

in related transformations strongly suggest the C–H activation via a dual ligand based Pd(II) species rather than via a Pd(IV) species as major contributor to the overall selectivities.

**Scheme S57:** Properties of the reaction steps.

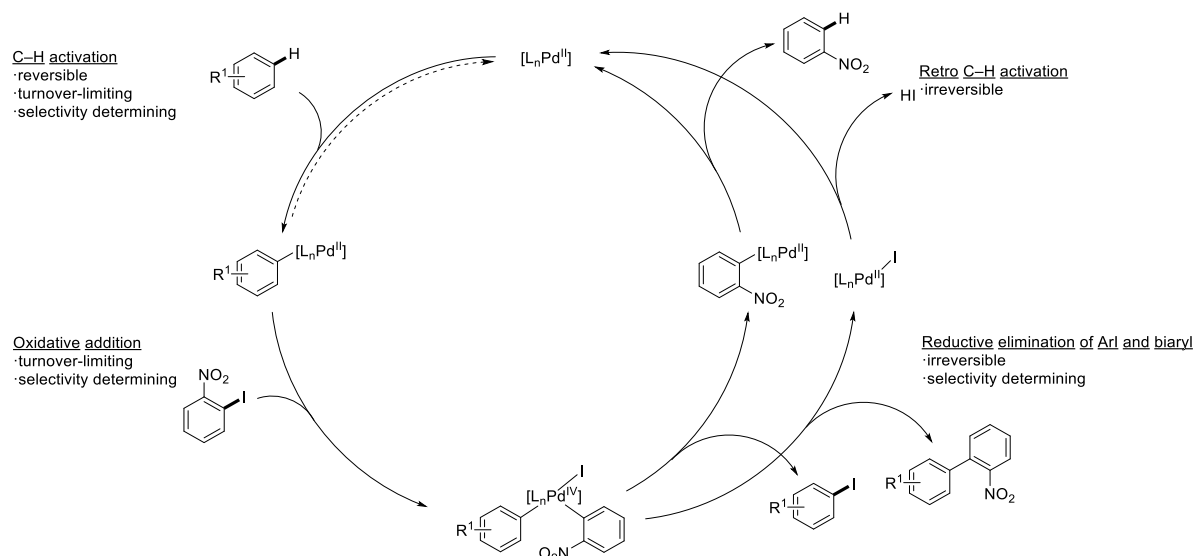

Regarding the rate- and selectivity-determining steps of the catalytic cycle, it is worth considering the effect of the Ag-additive. As shown in Schemes S32 and S33, the yield substantially drops and the regioselectivity changes favoring the electron-rich positions when no Ag is present. Two rationalizations are in principle possible: a) the observation could be indicative of Ag playing a role in the main rate- and selectivity-determining step, i.e. the C–H activation, or b) the Ag could be involved in another part of the catalytic cycle, which is not rate-/selectivity-determining in the presence of silver (or only contributes to a minor degree), but becomes the rate-/selectivity-determining step in the absence of Ag.<sup>15</sup> Several considerations lead us to favor the latter rationalization: Firstly, we have previously conducted extensive mechanistic studies on a related catalyst system, in which the Ag was demonstrated not to be part of the catalytic mode of action.<sup>16</sup> The related selectivities observed for the C–H activation step in the two studies and the similarity between the catalyst systems implies analogous catalytically active species and thus a C–H activation without the involvement of silver. From the discussion above regarding the rate- and selectivity-determining steps it can be concluded that the second step contributing to rate and selectivity is the oxidative addition step. An influence of the Ag-additive on the efficiency of this step would be in line with all observations within this study, as well as our own mechanistic data and the known influence of silver additives on this step.<sup>17</sup> This also agrees with the observation from Scheme S20 that using aryl iodide reagents with a lower tendency to undergo oxidative addition leads to analogous losses in yield and shifts in regioselectivity. We thus interpret the role of silver to affect the

oxidative addition part of the reaction mechanism in such way that the C–H activation remains the main selectivity-determining step while in its absence the oxidative addition contributes stronger and the overall process becomes less efficient, leading to the observed changes in yield and selectivity. Finally, besides these “active” roles of the Ag-additive, it must be considered that such an additive together with the reaction solvent HFIP forms a buffer with substantially altered solvent properties and proton activities, such that the positive effect observed on any stages of the catalytic cycle could well be explained by an indirect influence rather than a direct involvement of silver ions.

## 7 References

- (1) G. R. Fulmer, A. J. M. Miller, N. H. Sherden, H. E. Gottlieb, A. Nudelman, B. M. Stoltz, J. E. Bercaw, K. I. Goldberg, *Organometallics* **2010**, *29*, 2176.
- (2) R. K. Harris, E. D. Becker, S. M. Cabral de Menezes, R. Goodfellow, P. Granger, *Solid State Nucl. Magn. Reson.* **2002**, *22*, 458.
- (3) B. M. Partridge, J. F. Hartwig, *Org. Lett.* **2013**, *15*, 140; G. J. P. Perry, J. M. Quibell, A. Panigrahi, I. Larrosa, *J. Am. Chem. Soc.* **2017**, *139*, 11527.
- (4) H. Yang, Y. Li, M. Jiang, J. Wang, H. Fu, *Chem. Eur. J.* **2011**, *17*, 5652.
- (5) P. Klein, V. D. Lechner, T. Schimmel, L. Hintermann, *Chem. Eur. J.* **2020**, *26*, 176.
- (6) S. Mukhopadhyay, S. Batra, *Chem. Eur. J.* **2018**, *24*, 14622.
- (7) M. Jiang, H. Yang, Y. Jin, L. Ou, H. Fu, *Synlett* **2018**, *29*, 1572.
- (8) A. A. Cant, R. Bhalla, S. L. Pimlott, A. Sutherland, *Chem. Commun.* **2012**, *48*, 3993.
- (9) M. Bergström, G. Suresh, V. R. Naidu, C. R. Unelius, *Eur. J. Org. Chem.* **2017**, 3234.
- (10) H. O. Sintim, E.T. Kool, *Angew. Chem. Int. Ed.* **2006**, *45*, 1974.
- (11) J. Al-Ka'bi, J. A. Farooqi, P. H. Gore, A. M. G. Nassar, E. F. Saad, E. L. Short, D. N. Waters, *J. Chem. Soc. Perkin Trans. II* **1988**, 943-950.
- (12) *OriginPro*, OriginLab Corporation, Northampton, MA, USA.
- (13) A. K. Cook, M. S. Sanford, *J. Am. Chem. Soc.* **2015**, *137*, 3109.
- (14) E. Motti, N. Della Ca', S. Deledda, E. Fava, F. Panciroli, M. Catellani, *Chem. Commun.* **2010**, *46*, 4291; X.-C. Wang, W. Gong, L.-Z. Fang, R. Y. Zhu, S. Li, K. M. Engle, J.-Q. Yu, *Nature* **2015**, *519*, 334; Z. Dong, J. Wang, G. Dong, *J. Am. Chem. Soc.* **2015**, *137*, 5887; S. Li, H. Wang, Y. Weng, G. Li, *Angew. Chem. Int. Ed.* **2019**, *58*, 18502.
- (15) R. Evans, J. Sampson, L. Wang, L. Lückemeier, B. P. Carrow, *Chem. Commun.* **2021**, *57*, 9076-9079.
- (16) P. Wedi, M. Farizyan, K. Bergander, C. Mück-Lichtenfeld, M. van Gemmeren, *Angew. Chem. Int. Ed.* **2021**, *60*, 15641-15649.
- (17) N. Zhao, X. Jin, Y. Dang, *Chin. Chem. Lett.* **2021**, *32*, 3980-3983.
